# Supplementary material for: Modeling of the thermal properties of SARS-CoV-2 S-protein
Source: Front Mol Biosci. 2022 Sep 27;9:953064. doi: 10.3389/fmolb.2022.953064 (PMC9550926; doi:10.3389/fmolb.2022.953064)
Supplement: Supplementary file 1 [file Table1.XLS]

## Sheet: MC-MC Hbonds
Time(ns)	mc3	mc20	mc37	mc60	mc70	mc80	mc95
0	1311	1284	1299	1260	1250	1252	1281
0.1	1270	1230	1244	1242	1205	1209	1199
0.2	1267	1259	1255	1212	1228	1222	1198
0.3	1253	1275	1232	1206	1197	1227	1180
0.4	1263	1233	1242	1224	1214	1209	1188
0.5	1249	1233	1247	1243	1222	1250	1168
0.6	1281	1244	1240	1259	1227	1229	1209
0.7	1247	1266	1246	1248	1227	1221	1213
0.8	1277	1245	1237	1248	1228	1218	1206
0.9	1267	1234	1252	1249	1237	1228	1197
1	1252	1257	1238	1270	1225	1203	1196
1.1	1241	1264	1238	1251	1220	1224	1207
1.2	1267	1252	1248	1248	1215	1227	1202
1.3	1243	1266	1252	1258	1226	1238	1195
1.4	1249	1239	1238	1219	1246	1232	1202
1.5	1252	1249	1227	1259	1211	1228	1234
1.6	1235	1255	1237	1256	1214	1228	1200
1.7	1260	1246	1263	1271	1236	1215	1196
1.8	1261	1255	1229	1241	1218	1225	1209
1.9	1255	1256	1249	1241	1234	1218	1240
2	1261	1239	1236	1243	1212	1225	1222
2.1	1272	1243	1234	1251	1249	1235	1221
2.2	1270	1248	1226	1256	1218	1228	1202
2.3	1281	1282	1220	1269	1216	1227	1196
2.4	1257	1249	1253	1261	1213	1239	1188
2.5	1235	1241	1226	1231	1212	1225	1203
2.6	1264	1254	1261	1244	1230	1252	1207
2.7	1280	1245	1259	1245	1197	1237	1213
2.8	1266	1263	1223	1233	1214	1213	1202
2.9	1261	1250	1233	1243	1188	1201	1226
3	1254	1247	1258	1246	1218	1227	1204
3.1	1255	1236	1235	1233	1204	1249	1199
3.2	1272	1266	1247	1240	1211	1237	1193
3.3	1284	1241	1235	1249	1186	1207	1193
3.4	1274	1268	1247	1228	1228	1236	1229
3.5	1258	1257	1219	1233	1210	1222	1182
3.6	1262	1277	1240	1232	1201	1242	1215
3.7	1258	1250	1221	1221	1213	1222	1220
3.8	1271	1248	1232	1217	1184	1240	1206
3.9	1254	1247	1234	1230	1204	1243	1209
4	1255	1245	1250	1245	1189	1218	1206
4.1	1260	1239	1244	1233	1253	1217	1193
4.2	1255	1270	1242	1230	1229	1248	1215
4.3	1253	1256	1249	1248	1218	1238	1198
4.4	1251	1271	1252	1259	1206	1218	1229
4.5	1249	1260	1222	1249	1217	1221	1217
4.6	1252	1250	1229	1240	1243	1207	1210
4.7	1266	1274	1261	1248	1210	1229	1228
4.8	1240	1267	1219	1231	1240	1238	1228
4.9	1272	1257	1242	1236	1233	1224	1205
5	1257	1260	1223	1238	1204	1242	1191
5.1	1274	1250	1247	1254	1216	1222	1221
5.2	1258	1265	1242	1255	1213	1213	1201
5.3	1257	1261	1269	1219	1226	1231	1211
5.4	1263	1258	1245	1240	1207	1231	1217
5.5	1254	1259	1254	1252	1223	1232	1202
5.6	1246	1245	1266	1248	1209	1217	1206
5.7	1270	1271	1257	1226	1231	1234	1208
5.8	1267	1252	1262	1236	1226	1239	1236
5.9	1267	1255	1244	1258	1251	1250	1220
6	1258	1250	1242	1262	1224	1239	1219
6.1	1264	1261	1240	1221	1250	1216	1227
6.2	1256	1256	1232	1241	1227	1218	1201
6.3	1268	1266	1240	1239	1218	1239	1240
6.4	1248	1276	1227	1256	1225	1225	1213
6.5	1249	1266	1247	1252	1210	1239	1216
6.6	1245	1281	1247	1227	1211	1218	1217
6.7	1261	1266	1235	1270	1230	1243	1223
6.8	1249	1263	1241	1261	1210	1225	1226
6.9	1266	1237	1258	1245	1230	1224	1214
7	1273	1255	1238	1240	1214	1225	1216
7.1	1253	1249	1249	1246	1222	1215	1241
7.2	1258	1255	1248	1243	1215	1250	1197
7.3	1234	1263	1241	1251	1223	1203	1223
7.4	1256	1251	1275	1236	1222	1212	1221
7.5	1254	1271	1243	1230	1236	1224	1191
7.6	1248	1277	1233	1267	1225	1245	1203
7.7	1267	1244	1233	1240	1252	1228	1236
7.8	1241	1255	1247	1273	1253	1220	1214
7.9	1246	1260	1235	1259	1231	1240	1216
8	1271	1263	1250	1258	1248	1244	1244
8.1	1276	1252	1245	1257	1236	1247	1218
8.2	1272	1258	1285	1248	1232	1234	1233
8.3	1274	1244	1258	1253	1203	1217	1217
8.4	1242	1266	1264	1246	1219	1254	1221
8.5	1272	1262	1271	1253	1215	1228	1184
8.6	1265	1253	1260	1226	1230	1231	1192
8.7	1245	1273	1261	1223	1241	1238	1209
8.8	1256	1273	1267	1237	1237	1234	1223
8.9	1257	1270	1246	1255	1223	1240	1211
9	1285	1254	1263	1260	1246	1205	1205
9.1	1253	1269	1262	1234	1251	1252	1216
9.2	1256	1237	1245	1223	1245	1223	1217
9.3	1250	1274	1269	1269	1240	1228	1201
9.4	1257	1282	1249	1236	1238	1214	1208
9.5	1249	1262	1248	1236	1248	1201	1216
9.6	1249	1265	1256	1263	1258	1243	1212
9.7	1271	1263	1244	1251	1236	1232	1206
9.8	1272	1279	1245	1249	1249	1242	1237
9.9	1272	1258	1236	1247	1229	1232	1225
10	1267	1279	1257	1281	1244	1208	1203
10.1	1266	1247	1249	1245	1225	1204	1216
10.2	1254	1268	1261	1235	1229	1214	1222
10.3	1266	1261	1235	1230	1220	1239	1216
10.4	1268	1243	1240	1257	1205	1245	1210
10.5	1271	1275	1245	1253	1236	1219	1215
10.6	1260	1278	1240	1272	1244	1251	1213
10.7	1247	1254	1265	1232	1229	1233	1209
10.8	1260	1269	1230	1240	1230	1248	1226
10.9	1250	1273	1241	1261	1233	1230	1222
11	1270	1263	1249	1262	1218	1237	1213
11.1	1280	1256	1244	1266	1238	1231	1233
11.2	1262	1262	1252	1229	1231	1257	1225
11.3	1280	1271	1242	1233	1219	1215	1222
11.4	1272	1270	1233	1244	1236	1232	1217
11.5	1272	1256	1280	1255	1235	1249	1230
11.6	1228	1253	1222	1266	1237	1235	1245
11.7	1252	1270	1280	1259	1224	1229	1235
11.8	1250	1286	1229	1244	1231	1214	1214
11.9	1286	1284	1227	1251	1210	1233	1220
12	1259	1275	1270	1264	1235	1235	1229
12.1	1266	1272	1240	1277	1234	1249	1245
12.2	1254	1275	1254	1250	1204	1262	1243
12.3	1238	1253	1235	1251	1225	1235	1239
12.4	1259	1273	1246	1242	1233	1230	1215
12.5	1258	1264	1261	1253	1201	1226	1204
12.6	1256	1263	1273	1239	1247	1243	1248
12.7	1257	1257	1209	1254	1237	1249	1234
12.8	1270	1291	1261	1230	1238	1236	1239
12.9	1257	1278	1233	1240	1222	1203	1235
13	1269	1267	1224	1257	1229	1243	1192
13.1	1271	1280	1258	1259	1232	1223	1229
13.2	1282	1262	1229	1260	1219	1237	1226
13.3	1276	1267	1229	1223	1224	1239	1215
13.4	1257	1259	1252	1251	1243	1225	1210
13.5	1256	1269	1262	1232	1222	1233	1223
13.6	1259	1276	1260	1251	1231	1262	1235
13.7	1262	1264	1234	1240	1226	1253	1206
13.8	1263	1279	1269	1258	1218	1240	1217
13.9	1260	1278	1247	1247	1229	1248	1244
14	1244	1259	1246	1255	1232	1223	1245
14.1	1274	1267	1242	1237	1238	1226	1230
14.2	1260	1256	1255	1239	1227	1235	1230
14.3	1265	1261	1255	1219	1238	1237	1211
14.4	1258	1268	1242	1243	1231	1230	1237
14.5	1259	1259	1241	1275	1229	1225	1208
14.6	1284	1257	1248	1222	1224	1233	1268
14.7	1260	1290	1244	1234	1241	1232	1212
14.8	1255	1304	1247	1228	1248	1247	1210
14.9	1251	1289	1280	1260	1235	1225	1232
15	1267	1253	1235	1231	1228	1234	1206
15.1	1264	1271	1254	1250	1212	1212	1214
15.2	1271	1253	1271	1247	1214	1235	1219
15.3	1257	1259	1239	1257	1249	1240	1227
15.4	1251	1242	1274	1242	1223	1220	1234
15.5	1267	1265	1286	1232	1212	1221	1217
15.6	1255	1271	1252	1223	1214	1260	1229
15.7	1238	1254	1260	1234	1243	1226	1224
15.8	1256	1264	1256	1234	1203	1245	1231
15.9	1266	1254	1262	1243	1238	1222	1224
16	1251	1255	1257	1252	1225	1241	1233
16.1	1252	1249	1251	1226	1227	1218	1218
16.2	1260	1268	1260	1226	1211	1252	1206
16.3	1273	1254	1278	1240	1239	1243	1252
16.4	1282	1256	1290	1249	1243	1225	1211
16.5	1266	1274	1277	1238	1236	1248	1245
16.6	1268	1271	1262	1265	1215	1221	1207
16.7	1261	1282	1250	1254	1247	1242	1233
16.8	1239	1240	1266	1254	1224	1232	1215
16.9	1238	1260	1268	1249	1238	1230	1216
17	1266	1262	1272	1254	1227	1236	1208
17.1	1270	1255	1259	1251	1231	1236	1227
17.2	1262	1285	1265	1235	1236	1213	1215
17.3	1279	1270	1264	1205	1225	1220	1228
17.4	1256	1255	1283	1238	1228	1205	1219
17.5	1269	1272	1277	1199	1226	1215	1210
17.6	1253	1256	1263	1238	1221	1208	1232
17.7	1252	1290	1247	1239	1235	1233	1209
17.8	1278	1264	1269	1232	1207	1217	1201
17.9	1284	1252	1259	1240	1212	1232	1239
18	1271	1263	1282	1253	1208	1232	1222
18.1	1272	1253	1259	1228	1234	1254	1214
18.2	1247	1251	1253	1238	1221	1226	1192
18.3	1254	1250	1237	1227	1229	1203	1232
18.4	1263	1262	1249	1223	1220	1240	1227
18.5	1275	1252	1260	1251	1201	1193	1237
18.6	1267	1252	1251	1238	1230	1268	1200
18.7	1260	1251	1267	1252	1207	1226	1206
18.8	1266	1236	1274	1248	1207	1234	1211
18.9	1250	1258	1260	1229	1208	1219	1226
19	1261	1257	1280	1255	1218	1209	1217
19.1	1258	1267	1265	1261	1229	1211	1240
19.2	1276	1270	1275	1233	1194	1240	1211
19.3	1246	1269	1297	1244	1248	1226	1232
19.4	1272	1262	1254	1239	1236	1242	1225
19.5	1275	1260	1282	1235	1237	1245	1221
19.6	1260	1267	1274	1247	1220	1230	1249
19.7	1273	1265	1282	1251	1222	1230	1230
19.8	1268	1266	1252	1222	1234	1208	1229
19.9	1258	1274	1248	1244	1236	1234	1208
20	1255	1259	1259	1227	1245	1226	1222
20.1	1246	1250	1259	1217	1238	1208	1240
20.2	1254	1268	1251	1227	1209	1187	1242
20.3	1248	1247	1257	1229	1208	1203	1220
20.4	1248	1272	1240	1260	1214	1223	1223
20.5	1251	1295	1276	1227	1196	1217	1218
20.6	1264	1244	1254	1206	1219	1210	1217
20.7	1254	1270	1270	1240	1230	1185	1210
20.8	1278	1276	1263	1247	1195	1213	1200
20.9	1283	1267	1250	1233	1213	1227	1216
21	1264	1249	1265	1244	1231	1253	1238
21.1	1262	1249	1252	1223	1264	1205	1233
21.2	1249	1293	1253	1239	1229	1219	1212
21.3	1266	1282	1260	1256	1208	1210	1247
21.4	1254	1276	1260	1236	1229	1208	1220
21.5	1272	1259	1238	1259	1224	1225	1216
21.6	1266	1265	1247	1254	1217	1209	1221
21.7	1270	1245	1255	1254	1213	1215	1223
21.8	1267	1267	1257	1248	1220	1230	1206
21.9	1255	1270	1222	1232	1222	1229	1212
22	1264	1254	1254	1248	1224	1217	1190
22.1	1254	1257	1233	1233	1186	1200	1174
22.2	1242	1265	1234	1216	1206	1203	1236
22.3	1256	1251	1269	1255	1214	1237	1233
22.4	1252	1247	1234	1235	1208	1212	1217
22.5	1262	1246	1253	1228	1204	1218	1225
22.6	1233	1283	1235	1249	1239	1222	1206
22.7	1256	1278	1253	1237	1216	1213	1190
22.8	1274	1254	1259	1262	1222	1197	1193
22.9	1268	1258	1243	1246	1214	1200	1201
23	1279	1264	1236	1267	1207	1201	1202
23.1	1256	1249	1258	1249	1246	1213	1217
23.2	1267	1264	1257	1247	1237	1207	1208
23.3	1258	1245	1231	1253	1233	1222	1214
23.4	1269	1255	1232	1235	1208	1203	1201
23.5	1250	1241	1231	1206	1219	1246	1206
23.6	1261	1285	1246	1229	1240	1223	1206
23.7	1259	1280	1210	1247	1233	1200	1231
23.8	1254	1260	1266	1241	1225	1197	1225
23.9	1261	1248	1242	1211	1229	1219	1222
24	1272	1257	1272	1234	1224	1173	1201
24.1	1280	1243	1262	1242	1230	1200	1231
24.2	1258	1264	1248	1244	1233	1200	1201
24.3	1281	1257	1248	1229	1200	1217	1222
24.4	1237	1259	1239	1233	1242	1228	1198
24.5	1255	1268	1249	1237	1253	1206	1203
24.6	1265	1258	1240	1236	1230	1221	1209
24.7	1253	1265	1236	1207	1228	1221	1222
24.8	1247	1254	1240	1247	1224	1190	1216
24.9	1267	1268	1267	1263	1222	1224	1234
25	1249	1293	1257	1230	1231	1233	1219
25.1	1255	1269	1223	1255	1217	1220	1214
25.2	1276	1245	1249	1264	1211	1214	1212
25.3	1258	1259	1245	1249	1255	1220	1224
25.4	1265	1244	1242	1251	1221	1209	1218
25.5	1264	1244	1244	1243	1213	1183	1229
25.6	1266	1269	1249	1217	1226	1224	1228
25.7	1264	1232	1228	1247	1213	1223	1222
25.8	1264	1266	1236	1249	1185	1198	1243
25.9	1247	1256	1217	1233	1230	1221	1273
26	1280	1246	1242	1227	1218	1237	1239
26.1	1282	1250	1237	1220	1215	1199	1212
26.2	1228	1265	1237	1239	1215	1218	1246
26.3	1243	1254	1258	1227	1237	1210	1220
26.4	1258	1266	1249	1248	1211	1217	1214
26.5	1274	1280	1253	1224	1215	1205	1235
26.6	1249	1252	1237	1251	1200	1255	1233
26.7	1254	1232	1263	1236	1224	1250	1221
26.8	1254	1255	1230	1229	1216	1226	1247
26.9	1269	1257	1266	1225	1220	1216	1241
27	1261	1278	1244	1229	1218	1213	1226
27.1	1260	1264	1245	1233	1203	1186	1238
27.2	1265	1274	1258	1246	1234	1205	1216
27.3	1278	1244	1257	1232	1212	1220	1234
27.4	1266	1260	1248	1239	1220	1216	1244
27.5	1275	1263	1259	1218	1205	1228	1222
27.6	1248	1276	1242	1236	1227	1219	1243
27.7	1276	1272	1249	1256	1234	1215	1247
27.8	1263	1270	1253	1220	1221	1214	1243
27.9	1251	1271	1260	1225	1200	1207	1239
28	1257	1270	1270	1233	1214	1215	1212
28.1	1250	1280	1251	1236	1239	1224	1231
28.2	1256	1266	1230	1255	1214	1201	1236
28.3	1270	1279	1248	1240	1219	1201	1232
28.4	1257	1266	1253	1214	1200	1213	1219
28.5	1268	1277	1250	1250	1203	1228	1229
28.6	1247	1281	1264	1214	1202	1225	1221
28.7	1263	1275	1251	1242	1178	1220	1201
28.8	1259	1266	1248	1253	1202	1205	1218
28.9	1270	1269	1229	1229	1227	1187	1233
29	1261	1276	1234	1218	1220	1202	1232
29.1	1253	1267	1250	1240	1232	1200	1227
29.2	1260	1283	1253	1251	1207	1214	1220
29.3	1243	1286	1286	1214	1199	1221	1227
29.4	1266	1270	1257	1236	1212	1207	1200
29.5	1260	1269	1277	1222	1217	1223	1213
29.6	1242	1252	1227	1240	1218	1225	1191
29.7	1226	1245	1254	1234	1198	1215	1203
29.8	1225	1273	1258	1238	1238	1231	1212
29.9	1279	1265	1275	1226	1222	1211	1213
30	1262	1271	1263	1237	1228	1227	1223
30.1	1256	1256	1260	1222	1225	1213	1208
30.2	1244	1267	1244	1209	1227	1223	1207
30.3	1250	1266	1245	1193	1222	1220	1219
30.4	1257	1275	1230	1226	1196	1192	1226
30.5	1257	1288	1259	1221	1207	1189	1204
30.6	1275	1268	1256	1212	1216	1211	1188
30.7	1256	1261	1237	1231	1246	1193	1220
30.8	1262	1279	1236	1211	1223	1193	1215
30.9	1242	1266	1268	1235	1234	1215	1231
31	1260	1269	1247	1212	1238	1211	1231
31.1	1272	1262	1257	1244	1261	1201	1224
31.2	1266	1286	1241	1239	1237	1180	1207
31.3	1241	1278	1239	1257	1226	1195	1215
31.4	1257	1268	1230	1253	1239	1213	1229
31.5	1236	1300	1239	1244	1215	1213	1202
31.6	1245	1260	1239	1225	1253	1198	1223
31.7	1258	1258	1234	1247	1219	1215	1227
31.8	1239	1279	1234	1225	1239	1214	1232
31.9	1275	1280	1240	1234	1224	1226	1224
32	1260	1255	1242	1241	1225	1205	1220
32.1	1261	1256	1258	1249	1205	1224	1209
32.2	1268	1256	1249	1243	1217	1222	1212
32.3	1271	1272	1234	1250	1213	1221	1207
32.4	1260	1293	1279	1238	1227	1196	1194
32.5	1259	1254	1264	1250	1218	1241	1218
32.6	1245	1285	1219	1260	1255	1230	1257
32.7	1260	1282	1261	1246	1253	1224	1218
32.8	1256	1261	1253	1244	1221	1232	1237
32.9	1260	1269	1276	1248	1234	1219	1205
33	1254	1255	1255	1244	1231	1234	1227
33.1	1232	1267	1235	1251	1216	1244	1202
33.2	1275	1255	1257	1247	1217	1227	1225
33.3	1263	1278	1264	1240	1230	1245	1241
33.4	1247	1246	1246	1238	1234	1206	1229
33.5	1264	1271	1262	1237	1212	1216	1219
33.6	1287	1268	1269	1241	1207	1240	1217
33.7	1263	1265	1255	1246	1229	1254	1213
33.8	1271	1270	1236	1244	1225	1224	1223
33.9	1266	1272	1279	1243	1241	1227	1237
34	1268	1288	1268	1246	1227	1189	1221
34.1	1263	1262	1238	1245	1239	1223	1210
34.2	1262	1285	1233	1222	1234	1229	1212
34.3	1249	1260	1236	1212	1229	1208	1236
34.4	1285	1263	1230	1230	1230	1215	1222
34.5	1271	1257	1264	1240	1201	1237	1240
34.6	1272	1255	1272	1244	1236	1213	1207
34.7	1264	1269	1246	1232	1202	1239	1231
34.8	1265	1286	1229	1253	1248	1251	1232
34.9	1258	1272	1256	1247	1239	1226	1214
35	1283	1268	1253	1250	1204	1221	1244
35.1	1260	1267	1273	1220	1238	1221	1223
35.2	1284	1265	1261	1259	1240	1201	1242
35.3	1293	1266	1272	1254	1222	1222	1209
35.4	1265	1270	1266	1242	1219	1213	1256
35.5	1263	1258	1264	1234	1206	1196	1239
35.6	1263	1297	1255	1228	1221	1203	1217
35.7	1275	1264	1240	1244	1219	1217	1242
35.8	1264	1266	1269	1248	1200	1217	1240
35.9	1285	1269	1247	1229	1230	1224	1230
36	1263	1282	1244	1262	1243	1238	1215
36.1	1270	1257	1257	1249	1240	1233	1242
36.2	1270	1267	1268	1265	1218	1211	1222
36.3	1266	1280	1268	1257	1217	1228	1245
36.4	1262	1288	1246	1277	1247	1207	1221
36.5	1261	1272	1251	1261	1225	1231	1256
36.6	1258	1277	1268	1267	1212	1227	1218
36.7	1252	1287	1248	1260	1209	1242	1234
36.8	1271	1290	1250	1241	1231	1232	1224
36.9	1284	1274	1256	1259	1215	1207	1238
37	1270	1256	1253	1240	1194	1213	1221
37.1	1278	1288	1245	1247	1245	1226	1202
37.2	1269	1273	1246	1257	1246	1265	1213
37.3	1285	1292	1245	1268	1225	1216	1222
37.4	1258	1283	1230	1257	1240	1233	1204
37.5	1265	1268	1255	1241	1235	1213	1227
37.6	1256	1284	1252	1250	1234	1239	1207
37.7	1288	1280	1246	1233	1208	1244	1234
37.8	1276	1290	1248	1250	1249	1208	1194
37.9	1278	1268	1249	1235	1238	1261	1221
38	1248	1283	1262	1274	1233	1221	1203
38.1	1262	1281	1255	1229	1218	1217	1221
38.2	1258	1311	1270	1234	1259	1241	1223
38.3	1272	1285	1255	1229	1218	1244	1222
38.4	1269	1279	1261	1240	1214	1233	1207
38.5	1259	1289	1246	1236	1209	1228	1204
38.6	1268	1289	1239	1245	1234	1216	1218
38.7	1275	1274	1238	1254	1226	1243	1219
38.8	1270	1274	1251	1246	1232	1214	1227
38.9	1246	1280	1265	1254	1244	1224	1249
39	1283	1281	1259	1208	1220	1208	1198
39.1	1276	1288	1233	1231	1218	1208	1216
39.2	1284	1281	1257	1257	1214	1221	1255
39.3	1269	1286	1249	1254	1233	1208	1245
39.4	1274	1261	1257	1257	1250	1226	1213
39.5	1263	1289	1254	1253	1228	1235	1236
39.6	1264	1295	1284	1235	1225	1230	1217
39.7	1270	1286	1257	1263	1234	1224	1233
39.8	1265	1288	1247	1251	1225	1218	1223
39.9	1262	1299	1248	1251	1208	1213	1218
40	1270	1246	1252	1252	1222	1209	1213
40.1	1253	1272	1249	1230	1214	1195	1228
40.2	1288	1270	1250	1213	1244	1253	1224
40.3	1252	1280	1262	1223	1248	1221	1223
40.4	1253	1285	1276	1245	1241	1224	1226
40.5	1269	1262	1241	1237	1214	1212	1226
40.6	1257	1285	1257	1265	1232	1216	1241
40.7	1261	1294	1256	1264	1213	1220	1234
40.8	1249	1284	1228	1246	1207	1242	1226
40.9	1271	1295	1247	1244	1254	1232	1249
41	1258	1274	1255	1234	1235	1246	1231
41.1	1281	1305	1248	1261	1213	1233	1203
41.2	1272	1268	1247	1239	1230	1217	1210
41.3	1266	1270	1248	1230	1234	1223	1223
41.4	1255	1277	1256	1225	1247	1209	1221
41.5	1267	1290	1242	1233	1215	1212	1239
41.6	1243	1298	1256	1222	1244	1233	1232
41.7	1272	1293	1245	1247	1216	1224	1237
41.8	1238	1265	1246	1232	1224	1242	1233
41.9	1260	1269	1243	1229	1232	1233	1232
42	1242	1277	1246	1245	1240	1217	1258
42.1	1259	1260	1239	1240	1227	1204	1252
42.2	1250	1254	1235	1266	1240	1207	1236
42.3	1276	1280	1234	1262	1222	1215	1234
42.4	1264	1256	1270	1259	1229	1220	1223
42.5	1262	1305	1267	1258	1250	1207	1217
42.6	1272	1279	1261	1254	1223	1214	1202
42.7	1274	1259	1224	1260	1242	1227	1236
42.8	1268	1264	1245	1246	1222	1211	1212
42.9	1254	1275	1255	1250	1255	1183	1251
43	1253	1260	1250	1232	1212	1213	1216
43.1	1251	1267	1262	1219	1228	1176	1217
43.2	1242	1279	1271	1234	1219	1212	1238
43.3	1259	1270	1241	1222	1200	1221	1241
43.4	1274	1259	1259	1232	1235	1237	1236
43.5	1264	1277	1250	1261	1235	1197	1234
43.6	1251	1276	1237	1229	1215	1215	1234
43.7	1276	1258	1240	1249	1219	1210	1236
43.8	1244	1259	1238	1247	1233	1199	1224
43.9	1269	1261	1260	1232	1217	1207	1221
44	1264	1254	1255	1235	1220	1196	1236
44.1	1265	1283	1237	1257	1232	1218	1238
44.2	1269	1282	1256	1230	1220	1219	1248
44.3	1268	1284	1256	1223	1248	1219	1258
44.4	1246	1292	1262	1254	1221	1246	1239
44.5	1259	1272	1247	1255	1204	1211	1211
44.6	1262	1265	1236	1260	1233	1205	1219
44.7	1251	1286	1267	1274	1210	1230	1250
44.8	1249	1286	1249	1234	1243	1211	1222
44.9	1260	1283	1254	1254	1229	1185	1219
45	1252	1274	1230	1244	1241	1217	1205
45.1	1285	1268	1260	1246	1236	1232	1224
45.2	1284	1274	1243	1245	1208	1226	1238
45.3	1259	1274	1251	1263	1215	1222	1235
45.4	1291	1284	1254	1220	1222	1211	1226
45.5	1263	1279	1244	1238	1217	1218	1238
45.6	1274	1284	1233	1251	1235	1243	1221
45.7	1255	1297	1259	1255	1234	1245	1263
45.8	1257	1266	1250	1246	1226	1227	1233
45.9	1257	1261	1247	1259	1222	1234	1226
46	1260	1262	1258	1245	1217	1237	1209
46.1	1271	1291	1256	1241	1215	1237	1249
46.2	1265	1274	1268	1270	1229	1221	1227
46.3	1259	1279	1246	1249	1227	1218	1199
46.4	1249	1264	1246	1243	1217	1218	1215
46.5	1261	1294	1233	1270	1222	1222	1249
46.6	1258	1287	1255	1228	1232	1235	1225
46.7	1270	1255	1258	1260	1214	1200	1225
46.8	1255	1278	1244	1251	1244	1240	1225
46.9	1260	1297	1242	1267	1223	1225	1205
47	1275	1284	1242	1274	1237	1222	1228
47.1	1261	1268	1269	1263	1223	1225	1228
47.2	1241	1290	1269	1257	1222	1213	1252
47.3	1236	1267	1252	1238	1229	1240	1252
47.4	1276	1272	1245	1263	1220	1227	1220
47.5	1248	1290	1249	1260	1215	1220	1210
47.6	1268	1277	1251	1248	1243	1227	1227
47.7	1275	1250	1265	1265	1220	1234	1231
47.8	1240	1272	1249	1253	1219	1215	1222
47.9	1274	1303	1247	1245	1219	1208	1225
48	1272	1272	1236	1244	1224	1235	1232
48.1	1272	1290	1273	1249	1220	1263	1205
48.2	1256	1276	1243	1247	1213	1212	1238
48.3	1263	1264	1261	1259	1245	1213	1219
48.4	1253	1278	1247	1247	1228	1193	1229
48.5	1263	1272	1266	1253	1209	1213	1207
48.6	1271	1275	1266	1246	1235	1227	1236
48.7	1285	1283	1280	1241	1213	1216	1223
48.8	1249	1278	1256	1245	1238	1227	1215
48.9	1250	1287	1260	1226	1214	1200	1234
49	1269	1276	1247	1227	1213	1227	1224
49.1	1284	1255	1268	1237	1232	1208	1221
49.2	1279	1284	1250	1245	1226	1215	1219
49.3	1255	1298	1259	1219	1236	1230	1240
49.4	1265	1268	1238	1247	1238	1206	1226
49.5	1259	1261	1252	1236	1213	1233	1226
49.6	1260	1281	1234	1260	1245	1222	1207
49.7	1246	1303	1250	1251	1239	1205	1224
49.8	1273	1262	1244	1261	1218	1208	1203
49.9	1245	1265	1244	1246	1207	1206	1210
50	1269	1264	1246	1231	1231	1210	1250
50.1	1250	1279	1260	1241	1227	1180	1209
50.2	1249	1272	1265	1247	1223	1218	1226
50.3	1268	1288	1260	1225	1235	1232	1229
50.4	1246	1281	1265	1228	1247	1214	1211
50.5	1270	1274	1262	1250	1233	1207	1207
50.6	1249	1303	1255	1211	1228	1223	1240
50.7	1263	1281	1279	1242	1236	1195	1228
50.8	1264	1303	1253	1201	1222	1195	1226
50.9	1261	1292	1266	1237	1220	1205	1229
51	1250	1279	1268	1235	1251	1204	1201
51.1	1262	1285	1252	1233	1231	1214	1205
51.2	1245	1274	1230	1246	1209	1213	1201
51.3	1249	1295	1262	1240	1225	1203	1214
51.4	1267	1282	1263	1231	1229	1230	1223
51.5	1250	1298	1261	1249	1242	1226	1237
51.6	1266	1281	1269	1223	1233	1217	1198
51.7	1269	1278	1250	1218	1242	1211	1225
51.8	1254	1305	1239	1252	1216	1219	1223
51.9	1261	1288	1256	1254	1220	1180	1215
52	1238	1289	1284	1230	1256	1199	1173
52.1	1267	1308	1275	1246	1219	1205	1222
52.2	1251	1300	1263	1242	1227	1185	1217
52.3	1225	1295	1274	1234	1208	1187	1220
52.4	1264	1276	1264	1257	1217	1194	1200
52.5	1262	1285	1245	1247	1219	1214	1211
52.6	1246	1249	1249	1268	1234	1200	1220
52.7	1273	1270	1268	1250	1228	1229	1210
52.8	1266	1286	1254	1252	1228	1202	1222
52.9	1253	1265	1263	1239	1219	1200	1220
53	1259	1273	1267	1256	1213	1202	1238
53.1	1272	1274	1272	1239	1231	1225	1236
53.2	1253	1299	1263	1240	1233	1212	1215
53.3	1237	1281	1233	1233	1234	1211	1212
53.4	1244	1287	1233	1255	1227	1203	1191
53.5	1254	1272	1257	1235	1242	1197	1240
53.6	1244	1267	1262	1230	1203	1205	1212
53.7	1273	1280	1257	1251	1251	1230	1203
53.8	1253	1306	1273	1246	1250	1193	1207
53.9	1227	1285	1259	1230	1218	1185	1222
54	1244	1302	1267	1244	1232	1180	1221
54.1	1236	1294	1245	1242	1211	1219	1226
54.2	1242	1287	1255	1219	1228	1191	1231
54.3	1239	1284	1255	1245	1232	1190	1223
54.4	1259	1273	1260	1233	1204	1215	1216
54.5	1259	1280	1239	1224	1244	1205	1218
54.6	1242	1275	1259	1231	1240	1223	1218
54.7	1272	1295	1263	1222	1218	1205	1234
54.8	1246	1247	1249	1221	1211	1238	1220
54.9	1275	1280	1256	1223	1211	1236	1205
55	1252	1272	1253	1235	1230	1200	1213
55.1	1244	1295	1263	1211	1248	1223	1210
55.2	1253	1259	1260	1229	1239	1191	1214
55.3	1250	1283	1248	1227	1222	1215	1205
55.4	1272	1270	1249	1223	1224	1231	1208
55.5	1279	1274	1278	1249	1215	1200	1226
55.6	1248	1295	1255	1242	1200	1224	1227
55.7	1261	1299	1264	1248	1199	1235	1233
55.8	1251	1276	1260	1273	1215	1213	1215
55.9	1270	1280	1253	1245	1229	1220	1228
56	1258	1284	1245	1234	1202	1214	1206
56.1	1259	1297	1245	1269	1218	1239	1241
56.2	1274	1272	1261	1248	1215	1211	1211
56.3	1277	1280	1266	1274	1202	1224	1228
56.4	1267	1278	1263	1239	1224	1197	1214
56.5	1264	1282	1276	1232	1243	1214	1207
56.6	1265	1268	1240	1251	1237	1209	1243
56.7	1257	1294	1259	1218	1226	1229	1217
56.8	1258	1291	1258	1239	1241	1209	1237
56.9	1239	1266	1261	1235	1221	1210	1215
57	1257	1295	1268	1261	1248	1242	1214
57.1	1256	1284	1247	1266	1229	1236	1237
57.2	1256	1275	1274	1264	1238	1226	1212
57.3	1232	1305	1245	1248	1211	1210	1226
57.4	1261	1281	1276	1262	1210	1204	1220
57.5	1272	1265	1268	1250	1230	1229	1229
57.6	1275	1288	1266	1268	1213	1227	1239
57.7	1263	1274	1249	1239	1229	1235	1213
57.8	1270	1293	1264	1267	1239	1209	1199
57.9	1264	1280	1251	1234	1247	1225	1197
58	1255	1270	1257	1233	1228	1215	1239
58.1	1261	1301	1255	1249	1230	1215	1219
58.2	1245	1289	1263	1231	1235	1246	1240
58.3	1271	1248	1292	1243	1213	1241	1226
58.4	1266	1279	1256	1245	1222	1224	1198
58.5	1248	1276	1272	1235	1220	1232	1227
58.6	1265	1280	1244	1251	1222	1240	1237
58.7	1249	1263	1255	1236	1222	1248	1199
58.8	1290	1276	1252	1249	1222	1202	1194
58.9	1262	1273	1260	1252	1231	1231	1206
59	1298	1259	1229	1260	1221	1225	1219
59.1	1289	1250	1251	1239	1233	1235	1218
59.2	1258	1277	1253	1261	1223	1252	1208
59.3	1254	1291	1247	1241	1234	1251	1224
59.4	1271	1270	1220	1246	1235	1228	1227
59.5	1267	1266	1255	1251	1224	1217	1243
59.6	1267	1259	1239	1259	1231	1244	1218
59.7	1268	1271	1250	1239	1217	1223	1226
59.8	1275	1257	1242	1226	1215	1233	1221
59.9	1220	1258	1251	1241	1228	1236	1228
60	1261	1252	1243	1241	1266	1235	1213
60.1	1248	1272	1260	1242	1225	1220	1228
60.2	1257	1283	1254	1214	1220	1232	1228
60.3	1264	1266	1252	1250	1208	1232	1231
60.4	1251	1273	1263	1233	1233	1246	1201
60.5	1265	1285	1229	1237	1196	1217	1229
60.6	1259	1294	1276	1241	1236	1229	1218
60.7	1251	1266	1245	1248	1240	1219	1220
60.8	1258	1287	1239	1248	1246	1203	1233
60.9	1250	1286	1261	1261	1211	1249	1216
61	1266	1280	1270	1250	1221	1227	1218
61.1	1246	1283	1260	1241	1235	1217	1207
61.2	1265	1278	1233	1283	1235	1226	1210
61.3	1263	1274	1261	1254	1221	1222	1225
61.4	1264	1274	1247	1259	1240	1261	1220
61.5	1256	1282	1272	1237	1210	1232	1213
61.6	1280	1274	1258	1224	1242	1229	1210
61.7	1289	1269	1265	1267	1238	1210	1216
61.8	1257	1268	1242	1241	1209	1236	1205
61.9	1259	1269	1270	1235	1220	1247	1207
62	1261	1266	1270	1245	1218	1234	1229
62.1	1275	1256	1260	1229	1239	1222	1221
62.2	1277	1268	1266	1269	1208	1219	1202
62.3	1272	1263	1233	1249	1223	1196	1227
62.4	1282	1276	1243	1261	1211	1206	1250
62.5	1279	1268	1246	1244	1243	1214	1214
62.6	1266	1269	1231	1246	1207	1225	1237
62.7	1263	1258	1252	1255	1210	1220	1200
62.8	1251	1281	1241	1252	1229	1231	1223
62.9	1271	1268	1257	1230	1243	1227	1233
63	1251	1271	1249	1264	1222	1215	1226
63.1	1253	1298	1239	1235	1225	1231	1229
63.2	1260	1275	1239	1248	1228	1222	1249
63.3	1279	1294	1248	1239	1243	1209	1202
63.4	1279	1283	1252	1246	1213	1245	1209
63.5	1258	1291	1261	1239	1218	1224	1223
63.6	1246	1281	1247	1244	1211	1238	1230
63.7	1262	1274	1220	1247	1233	1235	1223
63.8	1262	1270	1238	1258	1215	1204	1204
63.9	1256	1283	1258	1243	1217	1209	1215
64	1255	1291	1275	1235	1235	1227	1206
64.1	1271	1266	1244	1250	1230	1251	1182
64.2	1246	1275	1260	1236	1198	1217	1206
64.3	1264	1258	1260	1253	1226	1216	1234
64.4	1258	1297	1258	1261	1209	1224	1224
64.5	1274	1260	1225	1266	1215	1201	1218
64.6	1256	1278	1241	1241	1216	1209	1205
64.7	1279	1286	1255	1259	1240	1213	1218
64.8	1279	1259	1257	1260	1248	1219	1215
64.9	1261	1301	1239	1245	1244	1202	1201
65	1263	1262	1253	1275	1212	1250	1225
65.1	1263	1273	1276	1254	1245	1247	1207
65.2	1240	1274	1247	1247	1259	1213	1228
65.3	1270	1284	1225	1257	1213	1228	1225
65.4	1266	1262	1245	1272	1242	1223	1217
65.5	1267	1289	1270	1233	1203	1237	1227
65.6	1268	1248	1249	1268	1210	1209	1229
65.7	1280	1267	1252	1271	1220	1236	1215
65.8	1271	1269	1239	1263	1236	1230	1224
65.9	1280	1241	1255	1251	1229	1218	1232
66	1263	1263	1247	1255	1233	1230	1229
66.1	1267	1271	1235	1229	1213	1223	1231
66.2	1268	1264	1229	1241	1211	1234	1214
66.3	1280	1262	1230	1231	1232	1212	1236
66.4	1250	1272	1274	1246	1222	1207	1228
66.5	1273	1268	1239	1265	1207	1209	1232
66.6	1266	1258	1244	1239	1217	1219	1231
66.7	1270	1242	1268	1239	1215	1196	1221
66.8	1268	1269	1257	1236	1223	1230	1193
66.9	1246	1289	1253	1253	1218	1231	1239
67	1254	1275	1261	1251	1232	1230	1211
67.1	1261	1284	1257	1249	1218	1200	1250
67.2	1266	1275	1276	1240	1204	1200	1211
67.3	1269	1278	1250	1243	1225	1220	1232
67.4	1249	1249	1244	1249	1218	1211	1228
67.5	1252	1263	1225	1242	1226	1237	1239
67.6	1282	1260	1241	1232	1229	1221	1211
67.7	1268	1275	1245	1217	1240	1228	1218
67.8	1257	1282	1267	1247	1190	1224	1239
67.9	1259	1275	1254	1217	1205	1209	1217
68	1261	1262	1238	1258	1236	1206	1235
68.1	1258	1278	1232	1254	1230	1231	1235
68.2	1252	1277	1247	1250	1220	1186	1222
68.3	1269	1259	1268	1240	1224	1222	1224
68.4	1273	1269	1225	1233	1208	1229	1200
68.5	1260	1249	1284	1240	1231	1236	1223
68.6	1268	1280	1261	1242	1234	1212	1226
68.7	1256	1269	1261	1259	1220	1212	1228
68.8	1250	1284	1240	1236	1226	1225	1233
68.9	1249	1292	1218	1245	1221	1244	1242
69	1263	1289	1242	1253	1230	1231	1227
69.1	1250	1280	1250	1242	1200	1214	1236
69.2	1293	1261	1246	1229	1237	1234	1233
69.3	1269	1278	1220	1250	1223	1211	1267
69.4	1280	1278	1249	1240	1216	1217	1252
69.5	1272	1263	1248	1249	1209	1239	1234
69.6	1265	1281	1246	1238	1218	1234	1195
69.7	1250	1263	1233	1233	1213	1241	1216
69.8	1272	1272	1243	1229	1219	1219	1223
69.9	1281	1264	1259	1242	1231	1233	1225
70	1250	1276	1246	1257	1212	1220	1234
70.1	1248	1249	1238	1238	1201	1225	1221
70.2	1265	1265	1241	1239	1229	1224	1221
70.3	1265	1268	1250	1236	1225	1227	1220
70.4	1266	1267	1245	1233	1222	1230	1214
70.5	1260	1285	1213	1223	1230	1236	1207
70.6	1260	1291	1238	1246	1201	1239	1240
70.7	1270	1267	1255	1217	1216	1231	1204
70.8	1274	1259	1238	1242	1211	1219	1213
70.9	1259	1263	1253	1237	1230	1233	1241
71	1255	1263	1227	1206	1224	1238	1242
71.1	1268	1268	1231	1234	1243	1217	1230
71.2	1254	1269	1261	1258	1229	1233	1234
71.3	1253	1272	1250	1235	1267	1241	1236
71.4	1263	1266	1235	1228	1223	1242	1247
71.5	1265	1255	1237	1246	1232	1237	1226
71.6	1276	1274	1265	1245	1228	1243	1273
71.7	1244	1287	1251	1241	1226	1235	1201
71.8	1267	1260	1237	1232	1220	1227	1203
71.9	1272	1254	1217	1252	1233	1241	1263
72	1278	1282	1236	1265	1236	1231	1236
72.1	1279	1264	1236	1245	1224	1233	1242
72.2	1278	1264	1237	1249	1234	1234	1258
72.3	1274	1266	1235	1236	1242	1244	1229
72.4	1247	1268	1229	1254	1247	1213	1241
72.5	1264	1263	1219	1229	1240	1228	1231
72.6	1284	1263	1226	1238	1235	1222	1219
72.7	1256	1286	1242	1242	1222	1255	1241
72.8	1269	1268	1224	1248	1207	1223	1218
72.9	1235	1301	1239	1222	1232	1235	1257
73	1257	1272	1232	1232	1237	1214	1235
73.1	1247	1262	1259	1257	1238	1219	1238
73.2	1270	1251	1221	1233	1239	1234	1221
73.3	1240	1262	1224	1242	1224	1246	1235
73.4	1263	1284	1242	1228	1216	1231	1210
73.5	1257	1275	1263	1254	1209	1219	1246
73.6	1268	1265	1253	1239	1225	1210	1264
73.7	1250	1257	1250	1234	1223	1210	1264
73.8	1251	1283	1235	1236	1254	1241	1226
73.9	1246	1264	1244	1258	1229	1231	1238
74	1275	1266	1247	1264	1218	1227	1240
74.1	1266	1278	1236	1239	1232	1232	1222
74.2	1266	1310	1248	1242	1233	1225	1244
74.3	1259	1259	1273	1232	1219	1217	1235
74.4	1260	1254	1239	1248	1213	1223	1245
74.5	1245	1292	1247	1253	1227	1230	1225
74.6	1264	1280	1248	1245	1210	1228	1226
74.7	1251	1266	1222	1274	1261	1230	1202
74.8	1252	1259	1234	1243	1212	1204	1239
74.9	1248	1262	1227	1231	1231	1233	1259
75	1282	1260	1247	1224	1234	1223	1231
75.1	1263	1276	1223	1265	1219	1209	1224
75.2	1263	1258	1236	1262	1242	1212	1234
75.3	1271	1273	1275	1244	1219	1229	1205
75.4	1247	1272	1233	1247	1231	1223	1223
75.5	1266	1280	1230	1272	1202	1199	1212
75.6	1265	1258	1240	1230	1225	1229	1228
75.7	1259	1279	1237	1239	1229	1231	1232
75.8	1263	1279	1230	1274	1231	1216	1222
75.9	1268	1250	1234	1246	1249	1225	1215
76	1246	1280	1234	1242	1227	1238	1215
76.1	1270	1283	1246	1233	1225	1224	1181
76.2	1262	1285	1217	1239	1233	1222	1214
76.3	1276	1262	1220	1246	1227	1218	1265
76.4	1263	1274	1258	1255	1227	1253	1218
76.5	1273	1262	1245	1218	1229	1238	1222
76.6	1261	1265	1248	1239	1221	1235	1231
76.7	1258	1273	1259	1270	1228	1241	1208
76.8	1268	1266	1239	1254	1225	1222	1243
76.9	1267	1277	1238	1250	1229	1234	1235
77	1271	1280	1238	1244	1231	1238	1230
77.1	1274	1285	1251	1238	1234	1197	1229
77.2	1283	1287	1215	1235	1199	1212	1229
77.3	1249	1292	1235	1237	1227	1228	1222
77.4	1266	1258	1250	1246	1227	1230	1252
77.5	1273	1274	1238	1251	1214	1231	1228
77.6	1272	1280	1251	1240	1224	1235	1225
77.7	1256	1269	1249	1231	1234	1210	1211
77.8	1264	1275	1229	1250	1207	1241	1206
77.9	1249	1250	1248	1269	1215	1205	1240
78	1253	1258	1235	1251	1225	1229	1232
78.1	1241	1262	1246	1263	1228	1232	1237
78.2	1273	1287	1245	1262	1213	1214	1225
78.3	1273	1272	1254	1254	1205	1222	1222
78.4	1244	1254	1244	1259	1199	1238	1218
78.5	1255	1288	1261	1253	1220	1227	1207
78.6	1263	1270	1230	1273	1232	1224	1225
78.7	1272	1285	1239	1247	1199	1240	1237
78.8	1263	1256	1256	1245	1221	1220	1237
78.9	1242	1267	1233	1242	1206	1248	1243
79	1263	1273	1254	1258	1213	1225	1228
79.1	1270	1262	1229	1239	1220	1214	1222
79.2	1265	1269	1239	1259	1213	1252	1234
79.3	1283	1268	1250	1255	1227	1227	1218
79.4	1256	1271	1237	1240	1231	1210	1219
79.5	1281	1271	1250	1244	1210	1226	1224
79.6	1274	1266	1231	1253	1201	1236	1225
79.7	1277	1270	1246	1233	1228	1247	1212
79.8	1277	1279	1242	1258	1219	1236	1233
79.9	1259	1284	1233	1255	1216	1208	1209
80	1267	1258	1236	1249	1221	1210	1218
80.1	1241	1262	1221	1246	1198	1228	1226
80.2	1272	1287	1239	1250	1227	1244	1232
80.3	1269	1283	1259	1248	1216	1202	1218
80.4	1253	1237	1243	1265	1224	1246	1213
80.5	1262	1268	1232	1241	1200	1215	1213
80.6	1269	1268	1241	1234	1209	1202	1219
80.7	1256	1263	1264	1270	1205	1220	1221
80.8	1257	1272	1258	1234	1226	1225	1223
80.9	1263	1269	1254	1241	1206	1215	1196
81	1273	1246	1250	1236	1224	1221	1222
81.1	1259	1270	1255	1256	1237	1240	1201
81.2	1258	1294	1238	1255	1190	1234	1239
81.3	1257	1280	1242	1220	1217	1199	1232
81.4	1264	1261	1231	1250	1216	1250	1222
81.5	1277	1278	1245	1231	1202	1229	1239
81.6	1250	1262	1255	1257	1219	1235	1209
81.7	1251	1285	1229	1245	1219	1242	1220
81.8	1274	1271	1234	1241	1215	1225	1206
81.9	1266	1267	1228	1219	1224	1227	1189
82	1279	1253	1238	1243	1205	1221	1231
82.1	1256	1280	1241	1243	1245	1250	1208
82.2	1268	1291	1250	1245	1221	1229	1216
82.3	1286	1280	1252	1267	1206	1207	1242
82.4	1265	1290	1241	1232	1208	1212	1234
82.5	1259	1254	1252	1255	1217	1222	1235
82.6	1258	1263	1222	1256	1226	1228	1238
82.7	1262	1274	1233	1272	1207	1225	1237
82.8	1281	1282	1249	1235	1210	1193	1210
82.9	1275	1278	1246	1250	1222	1200	1211
83	1261	1253	1227	1257	1234	1218	1230
83.1	1259	1268	1236	1243	1207	1239	1234
83.2	1273	1278	1255	1234	1251	1236	1216
83.3	1284	1265	1272	1260	1208	1235	1196
83.4	1265	1273	1256	1224	1240	1216	1221
83.5	1275	1284	1260	1263	1222	1218	1243
83.6	1295	1274	1253	1251	1242	1212	1210
83.7	1255	1257	1264	1246	1211	1214	1191
83.8	1262	1260	1258	1222	1200	1247	1208
83.9	1273	1279	1257	1228	1235	1216	1238
84	1290	1278	1237	1268	1220	1220	1234
84.1	1257	1265	1250	1238	1211	1219	1200
84.2	1265	1259	1230	1234	1209	1230	1192
84.3	1267	1286	1249	1229	1204	1232	1217
84.4	1276	1263	1245	1246	1224	1218	1223
84.5	1298	1287	1265	1244	1228	1228	1211
84.6	1256	1278	1245	1233	1211	1212	1226
84.7	1239	1296	1243	1263	1227	1230	1219
84.8	1253	1251	1246	1237	1201	1223	1221
84.9	1264	1267	1251	1239	1213	1212	1219
85	1247	1268	1246	1252	1226	1207	1227
85.1	1284	1278	1231	1235	1200	1220	1232
85.2	1246	1264	1247	1256	1206	1207	1235
85.3	1269	1270	1242	1233	1215	1232	1219
85.4	1284	1274	1216	1229	1235	1227	1202
85.5	1266	1280	1256	1243	1199	1222	1224
85.6	1259	1278	1234	1236	1212	1225	1222
85.7	1261	1293	1242	1249	1214	1221	1220
85.8	1265	1269	1258	1219	1222	1221	1221
85.9	1264	1231	1251	1247	1226	1229	1226
86	1253	1272	1257	1246	1221	1205	1218
86.1	1276	1270	1245	1235	1206	1232	1252
86.2	1258	1257	1244	1254	1213	1212	1198
86.3	1257	1243	1268	1243	1226	1206	1231
86.4	1254	1236	1263	1249	1216	1207	1196
86.5	1252	1262	1252	1232	1207	1221	1215
86.6	1246	1269	1227	1232	1233	1197	1206
86.7	1258	1265	1248	1236	1218	1207	1197
86.8	1285	1279	1266	1226	1228	1216	1223
86.9	1280	1264	1252	1235	1238	1211	1209
87	1265	1279	1268	1262	1213	1213	1210
87.1	1268	1278	1260	1253	1204	1167	1210
87.2	1268	1256	1264	1248	1232	1242	1192
87.3	1258	1249	1229	1243	1204	1201	1200
87.4	1261	1268	1242	1225	1235	1236	1224
87.5	1251	1254	1245	1213	1247	1211	1192
87.6	1277	1254	1236	1248	1230	1197	1208
87.7	1262	1265	1250	1222	1217	1207	1240
87.8	1283	1269	1241	1225	1225	1224	1214
87.9	1263	1254	1243	1234	1244	1232	1208
88	1250	1281	1262	1260	1227	1220	1213
88.1	1254	1279	1238	1241	1242	1231	1212
88.2	1255	1273	1230	1231	1198	1219	1233
88.3	1250	1276	1243	1250	1241	1246	1204
88.4	1259	1276	1252	1262	1207	1220	1213
88.5	1277	1275	1230	1216	1236	1227	1204
88.6	1264	1263	1235	1248	1213	1224	1212
88.7	1234	1289	1248	1239	1229	1237	1207
88.8	1267	1263	1242	1239	1202	1210	1229
88.9	1274	1268	1258	1245	1244	1223	1221
89	1281	1269	1275	1271	1222	1229	1206
89.1	1272	1277	1254	1255	1234	1234	1201
89.2	1245	1253	1264	1249	1219	1236	1223
89.3	1280	1267	1224	1236	1233	1236	1235
89.4	1268	1266	1259	1251	1228	1211	1227
89.5	1279	1270	1265	1271	1235	1236	1210
89.6	1252	1272	1251	1264	1232	1186	1218
89.7	1274	1272	1237	1238	1246	1197	1230
89.8	1265	1262	1235	1223	1199	1242	1205
89.9	1255	1282	1235	1245	1233	1223	1184
90	1260	1267	1267	1260	1231	1240	1213
90.1	1257	1270	1251	1236	1227	1207	1212
90.2	1257	1254	1256	1244	1203	1231	1180
90.3	1255	1288	1259	1254	1212	1233	1213
90.4	1276	1245	1238	1256	1219	1233	1202
90.5	1270	1271	1258	1239	1193	1201	1199
90.6	1273	1286	1252	1242	1203	1212	1227
90.7	1283	1254	1239	1241	1225	1221	1222
90.8	1265	1270	1256	1231	1237	1219	1221
90.9	1260	1262	1269	1253	1207	1202	1209
91	1261	1235	1230	1256	1239	1259	1227
91.1	1279	1266	1223	1248	1226	1243	1220
91.2	1252	1277	1254	1241	1213	1215	1230
91.3	1257	1270	1234	1245	1229	1220	1224
91.4	1272	1275	1257	1233	1188	1237	1208
91.5	1277	1270	1229	1225	1224	1253	1240
91.6	1284	1257	1273	1228	1214	1229	1220
91.7	1260	1278	1235	1248	1211	1206	1214
91.8	1278	1257	1256	1253	1213	1265	1202
91.9	1260	1264	1251	1226	1223	1232	1230
92	1268	1278	1234	1222	1201	1226	1208
92.1	1264	1263	1224	1245	1218	1238	1231
92.2	1268	1277	1240	1259	1240	1225	1206
92.3	1284	1291	1228	1234	1185	1214	1224
92.4	1255	1271	1227	1240	1208	1212	1200
92.5	1264	1266	1244	1245	1198	1225	1235
92.6	1279	1259	1229	1249	1231	1221	1216
92.7	1265	1273	1258	1227	1223	1235	1225
92.8	1278	1261	1250	1251	1213	1208	1202
92.9	1266	1277	1265	1253	1210	1249	1224
93	1278	1270	1230	1232	1192	1215	1227
93.1	1261	1274	1254	1229	1205	1226	1226
93.2	1284	1261	1238	1214	1200	1243	1240
93.3	1281	1285	1223	1246	1213	1204	1223
93.4	1269	1271	1237	1247	1217	1213	1201
93.5	1281	1257	1246	1241	1191	1215	1212
93.6	1275	1259	1244	1232	1208	1233	1211
93.7	1275	1276	1242	1234	1227	1243	1210
93.8	1275	1290	1259	1245	1211	1250	1225
93.9	1264	1259	1235	1244	1218	1245	1219
94	1289	1252	1253	1248	1224	1244	1211
94.1	1285	1256	1209	1236	1220	1216	1235
94.2	1284	1278	1243	1246	1226	1206	1227
94.3	1263	1269	1239	1242	1217	1221	1210
94.4	1267	1258	1244	1246	1210	1224	1226
94.5	1272	1255	1223	1231	1208	1237	1237
94.6	1266	1268	1222	1232	1210	1230	1230
94.7	1282	1253	1239	1230	1201	1231	1233
94.8	1278	1270	1258	1239	1212	1242	1225
94.9	1279	1242	1249	1269	1212	1211	1242
95	1258	1254	1228	1240	1211	1215	1222
95.1	1262	1261	1257	1255	1205	1222	1203
95.2	1247	1254	1261	1262	1225	1203	1217
95.3	1269	1256	1220	1246	1214	1219	1254
95.4	1274	1250	1262	1234	1212	1238	1215
95.5	1255	1273	1247	1230	1210	1230	1237
95.6	1262	1260	1249	1240	1216	1219	1215
95.7	1263	1272	1235	1265	1199	1214	1209
95.8	1291	1295	1244	1232	1189	1231	1201
95.9	1280	1266	1265	1244	1221	1204	1194
96	1264	1263	1251	1237	1220	1218	1213
96.1	1276	1262	1265	1270	1230	1223	1229
96.2	1272	1286	1258	1229	1192	1244	1220
96.3	1285	1265	1243	1254	1217	1206	1202
96.4	1276	1265	1241	1252	1199	1205	1219
96.5	1238	1287	1250	1236	1196	1210	1232
96.6	1263	1249	1265	1239	1207	1218	1233
96.7	1295	1253	1263	1254	1226	1214	1207
96.8	1273	1255	1248	1251	1200	1203	1219
96.9	1275	1282	1246	1263	1215	1197	1210
97	1269	1269	1254	1244	1227	1239	1218
97.1	1282	1266	1250	1239	1216	1200	1220
97.2	1276	1279	1254	1259	1205	1205	1201
97.3	1286	1271	1236	1252	1185	1220	1228
97.4	1274	1244	1256	1234	1229	1223	1212
97.5	1245	1270	1250	1239	1200	1231	1210
97.6	1269	1265	1239	1258	1171	1218	1225
97.7	1268	1276	1238	1229	1219	1239	1233
97.8	1270	1253	1246	1234	1202	1231	1226
97.9	1269	1255	1260	1262	1202	1197	1210
98	1279	1274	1249	1251	1223	1230	1219
98.1	1263	1264	1239	1238	1204	1226	1224
98.2	1272	1257	1231	1255	1185	1214	1243
98.3	1252	1270	1241	1235	1201	1232	1216
98.4	1276	1274	1247	1227	1218	1230	1214
98.5	1262	1246	1250	1258	1200	1223	1211
98.6	1275	1257	1239	1234	1199	1226	1223
98.7	1278	1275	1265	1260	1183	1213	1221
98.8	1257	1247	1267	1252	1192	1229	1220
98.9	1298	1270	1247	1238	1200	1193	1234
99	1277	1256	1237	1252	1199	1214	1219
99.1	1268	1256	1258	1249	1221	1221	1244
99.2	1270	1242	1255	1259	1218	1224	1250
99.3	1279	1247	1240	1245	1200	1205	1215
99.4	1273	1243	1250	1252	1208	1215	1220
99.5	1248	1235	1249	1253	1178	1207	1226
99.6	1272	1248	1251	1251	1185	1223	1180
99.7	1248	1248	1246	1250	1217	1218	1228
99.8	1271	1236	1257	1245	1186	1216	1227
99.9	1266	1238	1247	1248	1210	1244	1234
100	1267	1252	1233	1231	1215	1236	1236
100.1	1295	1249	1244	1231	1188	1213	1245
100.2	1261	1254	1241	1225	1220	1254	1237
100.3	1261	1262	1239	1237	1208	1226	1244
100.4	1264	1269	1248	1255	1195	1229	1232
100.5	1263	1279	1259	1254	1214	1233	1205
100.6	1273	1247	1249	1244	1227	1203	1231
100.7	1268	1264	1267	1226	1202	1202	1206
100.8	1257	1271	1276	1244	1212	1221	1220
100.9	1275	1277	1258	1236	1205	1219	1225
101	1257	1246	1251	1233	1215	1211	1242
101.1	1276	1277	1263	1229	1221	1196	1220
101.2	1267	1265	1236	1232	1208	1219	1229
101.3	1289	1260	1257	1250	1194	1227	1202
101.4	1256	1251	1271	1243	1197	1208	1236
101.5	1263	1270	1251	1259	1199	1235	1243
101.6	1278	1264	1253	1265	1209	1213	1234
101.7	1259	1250	1245	1262	1189	1241	1213
101.8	1277	1258	1236	1241	1210	1220	1225
101.9	1268	1262	1267	1250	1198	1243	1222
102	1264	1262	1245	1268	1199	1212	1217
102.1	1284	1248	1224	1234	1200	1208	1225
102.2	1276	1246	1250	1253	1194	1238	1229
102.3	1265	1273	1264	1256	1207	1225	1225
102.4	1283	1264	1238	1259	1205	1234	1233
102.5	1273	1244	1274	1244	1202	1227	1234
102.6	1272	1251	1220	1207	1196	1237	1237
102.7	1272	1258	1250	1246	1207	1228	1228
102.8	1256	1263	1239	1238	1213	1236	1184
102.9	1262	1251	1241	1253	1197	1207	1207
103	1276	1255	1251	1257	1202	1232	1245
103.1	1279	1245	1251	1219	1215	1209	1238
103.2	1264	1257	1244	1259	1216	1220	1228
103.3	1262	1254	1237	1236	1203	1224	1227
103.4	1264	1259	1234	1242	1195	1229	1246
103.5	1252	1262	1244	1237	1211	1255	1228
103.6	1251	1277	1245	1238	1222	1210	1228
103.7	1256	1238	1237	1243	1212	1221	1221
103.8	1287	1281	1245	1243	1222	1239	1234
103.9	1266	1275	1249	1242	1218	1216	1239
104	1269	1248	1260	1257	1251	1224	1212
104.1	1263	1258	1250	1235	1240	1244	1228
104.2	1267	1272	1221	1256	1230	1209	1216
104.3	1275	1245	1267	1254	1219	1217	1220
104.4	1264	1277	1235	1254	1232	1233	1216
104.5	1284	1231	1229	1249	1233	1226	1230
104.6	1272	1266	1235	1233	1221	1223	1233
104.7	1242	1280	1279	1261	1226	1241	1224
104.8	1265	1259	1250	1225	1226	1226	1217
104.9	1269	1264	1264	1253	1219	1236	1242
105	1260	1260	1239	1218	1198	1196	1239
105.1	1259	1272	1259	1241	1226	1196	1231
105.2	1283	1266	1276	1245	1217	1199	1240
105.3	1249	1242	1248	1255	1211	1201	1224
105.4	1264	1268	1240	1220	1223	1203	1224
105.5	1272	1259	1265	1216	1224	1231	1226
105.6	1265	1270	1242	1234	1224	1223	1226
105.7	1267	1250	1231	1234	1210	1228	1226
105.8	1244	1246	1251	1255	1211	1198	1218
105.9	1263	1255	1251	1239	1216	1211	1208
106	1251	1252	1253	1248	1234	1226	1230
106.1	1281	1248	1244	1234	1238	1209	1227
106.2	1268	1260	1243	1265	1209	1213	1213
106.3	1270	1252	1237	1261	1227	1198	1229
106.4	1271	1253	1242	1254	1230	1234	1239
106.5	1252	1230	1258	1242	1201	1208	1219
106.6	1251	1243	1247	1245	1227	1240	1213
106.7	1266	1232	1235	1220	1205	1225	1233
106.8	1271	1253	1222	1219	1205	1226	1206
106.9	1253	1245	1244	1238	1234	1208	1218
107	1271	1252	1230	1239	1198	1225	1213
107.1	1270	1256	1238	1232	1216	1207	1224
107.2	1256	1241	1267	1215	1197	1219	1231
107.3	1250	1246	1243	1243	1244	1210	1235
107.4	1266	1253	1243	1242	1222	1201	1228
107.5	1255	1264	1234	1233	1193	1222	1225
107.6	1247	1251	1244	1254	1197	1210	1241
107.7	1276	1255	1244	1237	1204	1238	1209
107.8	1266	1270	1231	1244	1241	1233	1209
107.9	1268	1260	1254	1260	1240	1225	1195
108	1257	1258	1248	1263	1221	1193	1213
108.1	1246	1258	1258	1256	1217	1220	1227
108.2	1267	1253	1238	1249	1214	1235	1238
108.3	1278	1249	1230	1247	1209	1220	1217
108.4	1246	1272	1253	1239	1196	1223	1216
108.5	1278	1269	1267	1243	1206	1228	1232
108.6	1283	1234	1230	1239	1233	1221	1232
108.7	1273	1266	1248	1246	1214	1227	1236
108.8	1266	1251	1261	1248	1225	1231	1237
108.9	1271	1253	1248	1241	1198	1241	1229
109	1252	1246	1241	1254	1211	1234	1216
109.1	1264	1236	1246	1254	1232	1225	1251
109.2	1243	1263	1239	1270	1215	1207	1244
109.3	1265	1276	1238	1261	1206	1238	1238
109.4	1258	1268	1226	1251	1202	1218	1197
109.5	1264	1271	1237	1242	1225	1232	1210
109.6	1282	1241	1219	1225	1210	1218	1224
109.7	1267	1256	1240	1235	1223	1219	1215
109.8	1256	1254	1242	1221	1222	1244	1254
109.9	1268	1253	1270	1254	1198	1236	1236
110	1268	1274	1251	1230	1214	1212	1229
110.1	1259	1268	1242	1233	1202	1233	1227
110.2	1244	1273	1255	1248	1225	1231	1240
110.3	1248	1265	1251	1241	1216	1216	1239
110.4	1265	1266	1244	1238	1216	1223	1236
110.5	1286	1260	1234	1243	1207	1241	1233
110.6	1266	1268	1247	1253	1202	1242	1241
110.7	1271	1260	1217	1265	1217	1225	1249
110.8	1258	1275	1252	1254	1206	1226	1222
110.9	1258	1261	1234	1257	1218	1230	1217
111	1266	1273	1235	1253	1202	1217	1239
111.1	1271	1259	1239	1271	1232	1251	1242
111.2	1267	1237	1224	1248	1225	1229	1219
111.3	1265	1265	1228	1249	1187	1238	1247
111.4	1259	1255	1245	1260	1235	1226	1220
111.5	1259	1266	1259	1273	1217	1207	1214
111.6	1265	1254	1242	1262	1197	1233	1210
111.7	1267	1266	1233	1244	1243	1232	1221
111.8	1255	1275	1242	1242	1202	1220	1217
111.9	1285	1264	1248	1257	1215	1234	1207
112	1248	1249	1243	1237	1220	1235	1213
112.1	1269	1267	1250	1249	1233	1229	1222
112.2	1260	1289	1249	1233	1232	1247	1205
112.3	1261	1272	1257	1242	1230	1235	1244
112.4	1266	1272	1242	1237	1226	1242	1216
112.5	1271	1267	1234	1248	1220	1227	1235
112.6	1262	1273	1251	1227	1231	1222	1205
112.7	1267	1244	1248	1234	1234	1248	1246
112.8	1276	1270	1236	1269	1210	1252	1224
112.9	1263	1278	1227	1242	1208	1219	1242
113	1255	1286	1240	1251	1226	1238	1235
113.1	1257	1275	1245	1256	1194	1220	1226
113.2	1246	1282	1230	1242	1243	1215	1235
113.3	1260	1265	1254	1270	1239	1193	1234
113.4	1277	1262	1249	1264	1238	1225	1229
113.5	1226	1281	1259	1231	1213	1236	1224
113.6	1258	1281	1257	1263	1223	1239	1197
113.7	1268	1267	1243	1229	1230	1237	1242
113.8	1275	1281	1236	1255	1204	1241	1198
113.9	1258	1248	1230	1276	1211	1236	1213
114	1268	1284	1229	1249	1216	1210	1228
114.1	1281	1275	1245	1234	1220	1243	1212
114.2	1268	1260	1237	1272	1246	1234	1239
114.3	1277	1279	1239	1247	1237	1238	1243
114.4	1256	1263	1244	1255	1211	1215	1231
114.5	1267	1273	1221	1251	1220	1239	1224
114.6	1270	1266	1233	1270	1238	1233	1240
114.7	1256	1261	1238	1268	1245	1247	1235
114.8	1269	1281	1242	1270	1215	1205	1212
114.9	1242	1276	1235	1240	1219	1212	1236
115	1265	1262	1237	1230	1203	1214	1222
115.1	1259	1267	1257	1275	1218	1219	1219
115.2	1273	1273	1244	1262	1215	1248	1247
115.3	1266	1253	1248	1246	1210	1256	1246
115.4	1262	1245	1264	1252	1214	1249	1244
115.5	1237	1255	1248	1258	1231	1234	1224
115.6	1268	1250	1241	1264	1232	1250	1224
115.7	1270	1266	1251	1260	1227	1215	1232
115.8	1263	1261	1235	1264	1218	1241	1230
115.9	1257	1244	1255	1247	1227	1229	1232
116	1242	1264	1269	1246	1212	1239	1213
116.1	1269	1271	1246	1253	1237	1199	1244
116.2	1270	1264	1260	1251	1214	1221	1219
116.3	1251	1265	1247	1275	1201	1216	1192
116.4	1239	1254	1229	1241	1207	1245	1222
116.5	1281	1275	1223	1262	1210	1229	1218
116.6	1277	1244	1257	1274	1203	1226	1209
116.7	1280	1266	1254	1264	1198	1216	1207
116.8	1242	1242	1236	1265	1223	1216	1231
116.9	1283	1259	1261	1247	1200	1243	1241
117	1264	1253	1235	1278	1196	1238	1203
117.1	1246	1257	1263	1240	1225	1219	1226
117.2	1241	1277	1227	1254	1235	1246	1204
117.3	1270	1238	1224	1251	1220	1232	1230
117.4	1265	1260	1233	1276	1217	1246	1225
117.5	1259	1257	1250	1243	1221	1230	1218
117.6	1257	1252	1239	1269	1206	1223	1246
117.7	1244	1256	1230	1265	1222	1235	1221
117.8	1257	1251	1236	1269	1227	1241	1209
117.9	1240	1239	1273	1230	1219	1225	1218
118	1254	1236	1229	1248	1210	1231	1241
118.1	1273	1235	1210	1246	1236	1238	1220
118.2	1259	1254	1235	1280	1225	1228	1204
118.3	1242	1269	1192	1304	1217	1249	1242
118.4	1253	1264	1251	1220	1230	1242	1229
118.5	1259	1237	1236	1239	1206	1243	1226
118.6	1260	1240	1245	1271	1211	1256	1221
118.7	1257	1244	1252	1267	1222	1265	1234
118.8	1251	1240	1234	1265	1239	1266	1222
118.9	1259	1246	1223	1255	1215	1250	1240
119	1253	1258	1256	1235	1254	1235	1214
119.1	1259	1259	1252	1236	1215	1241	1226
119.2	1244	1234	1224	1221	1193	1234	1226
119.3	1267	1238	1245	1260	1226	1228	1254
119.4	1263	1217	1242	1289	1217	1256	1219
119.5	1261	1264	1262	1244	1216	1217	1204
119.6	1265	1258	1240	1224	1223	1233	1213
119.7	1261	1239	1251	1271	1214	1242	1208
119.8	1261	1242	1226	1278	1238	1240	1232
119.9	1269	1248	1262	1249	1217	1220	1245
120	1267	1240	1254	1275	1229	1241	1242
120.1	1275	1258	1220	1252	1213	1248	1226
120.2	1252	1251	1239	1259	1221	1217	1209
120.3	1272	1273	1243	1264	1205	1236	1240
120.4	1264	1255	1238	1252	1236	1237	1254
120.5	1272	1267	1235	1266	1202	1246	1221
120.6	1257	1261	1229	1228	1223	1260	1243
120.7	1229	1257	1248	1259	1199	1249	1204
120.8	1254	1270	1264	1251	1234	1249	1222
120.9	1271	1252	1252	1257	1219	1217	1237
121	1276	1260	1242	1256	1218	1229	1232
121.1	1272	1245	1237	1268	1229	1205	1228
121.2	1254	1278	1237	1258	1213	1219	1226
121.3	1253	1267	1238	1262	1217	1222	1210
121.4	1262	1245	1223	1265	1223	1242	1216
121.5	1271	1243	1224	1248	1215	1202	1260
121.6	1253	1262	1244	1239	1216	1234	1221
121.7	1260	1266	1221	1251	1223	1263	1215
121.8	1247	1281	1227	1268	1230	1254	1235
121.9	1257	1233	1253	1248	1233	1235	1267
122	1254	1259	1235	1247	1217	1216	1220
122.1	1258	1275	1252	1283	1218	1215	1225
122.2	1268	1259	1251	1252	1229	1235	1218
122.3	1250	1249	1232	1243	1232	1232	1220
122.4	1261	1247	1262	1253	1213	1268	1217
122.5	1294	1273	1232	1261	1196	1243	1229
122.6	1251	1255	1266	1260	1223	1232	1216
122.7	1266	1258	1230	1269	1191	1220	1208
122.8	1241	1268	1223	1224	1228	1249	1245
122.9	1282	1256	1242	1277	1235	1225	1195
123	1282	1258	1250	1263	1244	1226	1223
123.1	1254	1263	1226	1270	1211	1246	1235
123.2	1249	1269	1244	1264	1237	1254	1233
123.3	1253	1256	1239	1256	1237	1244	1234
123.4	1289	1255	1233	1268	1235	1251	1213
123.5	1254	1267	1232	1259	1202	1242	1217
123.6	1264	1258	1247	1249	1239	1247	1202
123.7	1256	1261	1226	1257	1188	1224	1245
123.8	1258	1251	1235	1252	1213	1237	1234
123.9	1260	1242	1222	1249	1221	1239	1210
124	1272	1256	1243	1248	1257	1230	1215
124.1	1248	1233	1233	1250	1204	1222	1182
124.2	1269	1255	1255	1248	1220	1242	1217
124.3	1241	1262	1220	1271	1209	1216	1217
124.4	1247	1257	1231	1256	1220	1243	1220
124.5	1250	1249	1216	1252	1241	1226	1250
124.6	1251	1255	1210	1258	1225	1232	1218
124.7	1242	1253	1238	1256	1228	1215	1223
124.8	1250	1257	1216	1262	1240	1229	1242
124.9	1272	1269	1245	1231	1217	1211	1233
125	1243	1241	1239	1281	1236	1223	1223
125.1	1255	1236	1249	1252	1212	1220	1220
125.2	1261	1247	1229	1270	1215	1247	1248
125.3	1268	1247	1274	1232	1240	1228	1219
125.4	1248	1275	1249	1230	1204	1222	1188
125.5	1227	1242	1243	1241	1217	1223	1251
125.6	1249	1249	1245	1220	1209	1226	1187
125.7	1267	1246	1222	1223	1211	1214	1229
125.8	1275	1249	1220	1247	1230	1206	1220
125.9	1252	1261	1239	1250	1213	1217	1160
126	1236	1273	1230	1246	1224	1207	1219
126.1	1246	1252	1229	1263	1192	1230	1230
126.2	1262	1268	1230	1232	1224	1230	1197
126.3	1247	1254	1262	1234	1186	1217	1242
126.4	1258	1251	1218	1266	1223	1216	1220
126.5	1253	1252	1272	1237	1228	1223	1209
126.6	1263	1288	1231	1259	1230	1232	1220
126.7	1257	1259	1241	1254	1216	1212	1224
126.8	1247	1256	1235	1239	1227	1218	1200
126.9	1263	1261	1243	1227	1230	1220	1216
127	1266	1239	1256	1239	1204	1231	1214
127.1	1253	1242	1250	1246	1228	1223	1258
127.2	1271	1262	1217	1246	1201	1245	1219
127.3	1258	1282	1238	1252	1234	1256	1234
127.4	1249	1250	1239	1254	1217	1219	1241
127.5	1253	1259	1216	1238	1214	1228	1233
127.6	1268	1264	1250	1241	1212	1227	1224
127.7	1239	1261	1239	1257	1236	1194	1237
127.8	1262	1270	1235	1244	1206	1248	1233
127.9	1264	1273	1229	1248	1212	1235	1222
128	1257	1262	1254	1247	1209	1240	1215
128.1	1262	1262	1229	1247	1232	1217	1204
128.2	1258	1261	1230	1243	1215	1209	1208
128.3	1281	1246	1231	1249	1233	1219	1238
128.4	1252	1299	1229	1248	1245	1230	1213
128.5	1247	1230	1247	1251	1222	1226	1241
128.6	1246	1228	1253	1258	1215	1222	1230
128.7	1273	1251	1229	1244	1244	1244	1235
128.8	1249	1264	1243	1255	1244	1220	1219
128.9	1253	1261	1253	1260	1238	1234	1248
129	1244	1258	1251	1238	1217	1215	1246
129.1	1256	1254	1252	1250	1239	1216	1237
129.2	1253	1267	1238	1247	1227	1233	1229
129.3	1266	1260	1226	1230	1242	1257	1234
129.4	1255	1247	1218	1239	1218	1233	1220
129.5	1265	1282	1252	1237	1218	1213	1216
129.6	1253	1272	1234	1210	1218	1244	1236
129.7	1291	1262	1264	1238	1239	1232	1236
129.8	1273	1237	1247	1251	1216	1240	1212
129.9	1263	1272	1260	1245	1220	1234	1214
130	1273	1248	1241	1265	1218	1254	1249
130.1	1280	1232	1212	1228	1198	1212	1210
130.2	1252	1277	1239	1236	1210	1226	1244
130.3	1274	1276	1229	1258	1224	1215	1217
130.4	1265	1270	1236	1235	1205	1217	1201
130.5	1259	1280	1213	1220	1214	1236	1254
130.6	1260	1246	1243	1250	1203	1252	1234
130.7	1268	1231	1249	1249	1228	1238	1231
130.8	1282	1257	1243	1241	1203	1227	1248
130.9	1273	1252	1226	1226	1215	1242	1232
131	1279	1244	1247	1251	1203	1202	1239
131.1	1260	1239	1235	1253	1227	1214	1261
131.2	1258	1265	1232	1255	1222	1225	1233
131.3	1271	1262	1264	1248	1205	1233	1230
131.4	1258	1242	1235	1246	1195	1222	1222
131.5	1248	1241	1221	1243	1203	1218	1232
131.6	1245	1258	1230	1229	1248	1217	1234
131.7	1285	1273	1237	1231	1240	1227	1245
131.8	1255	1263	1243	1246	1210	1233	1255
131.9	1263	1241	1217	1236	1233	1219	1228
132	1257	1262	1237	1221	1211	1249	1219
132.1	1275	1251	1227	1253	1205	1239	1227
132.2	1260	1253	1221	1255	1242	1237	1212
132.3	1253	1257	1230	1248	1203	1203	1247
132.4	1267	1258	1256	1244	1227	1227	1233
132.5	1279	1256	1228	1251	1229	1228	1182
132.6	1257	1258	1238	1241	1234	1258	1225
132.7	1257	1255	1241	1228	1205	1216	1215
132.8	1274	1242	1253	1222	1230	1207	1237
132.9	1266	1258	1232	1235	1192	1233	1213
133	1263	1251	1243	1241	1216	1228	1211
133.1	1277	1274	1230	1249	1221	1202	1221
133.2	1254	1244	1247	1243	1211	1220	1210
133.3	1269	1266	1248	1233	1230	1221	1232
133.4	1262	1258	1213	1239	1215	1232	1229
133.5	1265	1267	1230	1262	1241	1212	1271
133.6	1255	1222	1254	1228	1198	1222	1254
133.7	1271	1268	1233	1254	1203	1219	1245
133.8	1251	1241	1235	1232	1206	1229	1237
133.9	1253	1269	1218	1236	1217	1226	1238
134	1257	1276	1220	1243	1211	1220	1221
134.1	1270	1267	1239	1227	1220	1215	1225
134.2	1279	1265	1246	1237	1199	1221	1206
134.3	1288	1275	1242	1229	1204	1237	1215
134.4	1282	1271	1241	1233	1224	1234	1200
134.5	1273	1247	1233	1273	1186	1224	1219
134.6	1264	1255	1236	1252	1215	1205	1236
134.7	1247	1250	1225	1243	1196	1239	1243
134.8	1262	1272	1249	1265	1232	1253	1229
134.9	1247	1226	1242	1250	1202	1205	1235
135	1261	1277	1234	1261	1215	1217	1224
135.1	1270	1263	1223	1252	1237	1226	1234
135.2	1255	1274	1224	1256	1200	1236	1255
135.3	1256	1274	1258	1247	1237	1221	1239
135.4	1247	1248	1248	1256	1224	1235	1210
135.5	1261	1239	1229	1242	1242	1228	1242
135.6	1249	1240	1238	1233	1226	1240	1234
135.7	1247	1250	1257	1237	1212	1249	1243
135.8	1258	1253	1259	1244	1186	1213	1227
135.9	1255	1265	1234	1242	1210	1235	1219
136	1256	1255	1233	1252	1204	1218	1246
136.1	1251	1282	1244	1237	1213	1231	1220
136.2	1264	1232	1230	1254	1244	1210	1224
136.3	1279	1227	1234	1250	1217	1212	1213
136.4	1264	1241	1248	1212	1227	1230	1227
136.5	1263	1240	1239	1229	1198	1209	1254
136.6	1272	1275	1222	1266	1195	1244	1228
136.7	1248	1248	1235	1265	1209	1222	1251
136.8	1253	1270	1238	1255	1229	1234	1211
136.9	1236	1270	1230	1230	1206	1228	1230
137	1257	1238	1233	1234	1225	1253	1222
137.1	1267	1259	1245	1245	1227	1238	1245
137.2	1256	1261	1229	1228	1198	1240	1249
137.3	1282	1266	1244	1266	1217	1205	1245
137.4	1275	1262	1233	1262	1209	1230	1260
137.5	1253	1247	1225	1271	1228	1211	1232
137.6	1275	1257	1253	1231	1199	1239	1243
137.7	1243	1249	1238	1237	1220	1246	1243
137.8	1264	1241	1236	1264	1199	1264	1235
137.9	1271	1248	1237	1258	1219	1232	1227
138	1257	1249	1277	1238	1223	1235	1232
138.1	1254	1261	1238	1258	1215	1225	1282
138.2	1281	1276	1221	1246	1232	1241	1259
138.3	1248	1270	1255	1252	1211	1234	1258
138.4	1254	1277	1234	1273	1220	1238	1244
138.5	1258	1235	1231	1257	1211	1225	1236
138.6	1251	1253	1240	1213	1234	1231	1237
138.7	1267	1266	1255	1257	1235	1239	1224
138.8	1275	1226	1233	1226	1226	1207	1243
138.9	1261	1235	1238	1229	1213	1233	1226
139	1262	1278	1256	1255	1229	1224	1229
139.1	1267	1241	1240	1234	1217	1216	1240
139.2	1291	1264	1231	1247	1214	1202	1239
139.3	1282	1245	1242	1258	1202	1237	1241
139.4	1254	1247	1235	1256	1202	1235	1248
139.5	1257	1233	1225	1224	1182	1217	1237
139.6	1273	1280	1239	1258	1206	1250	1235
139.7	1260	1246	1243	1236	1228	1223	1224
139.8	1270	1252	1222	1239	1182	1220	1207
139.9	1256	1243	1238	1263	1201	1201	1228
140	1254	1240	1229	1256	1212	1249	1257
140.1	1248	1253	1223	1231	1213	1230	1188
140.2	1254	1265	1236	1252	1225	1234	1240
140.3	1242	1262	1254	1242	1229	1242	1207
140.4	1257	1237	1242	1237	1203	1222	1227
140.5	1263	1245	1241	1244	1217	1228	1232
140.6	1250	1253	1257	1248	1237	1239	1228
140.7	1258	1251	1251	1258	1204	1226	1238
140.8	1274	1247	1242	1243	1219	1232	1243
140.9	1272	1252	1252	1248	1214	1226	1223
141	1234	1263	1239	1254	1226	1238	1224
141.1	1245	1258	1245	1243	1233	1241	1233
141.2	1258	1225	1249	1266	1222	1226	1223
141.3	1246	1238	1250	1237	1225	1242	1241
141.4	1246	1260	1247	1272	1220	1233	1217
141.5	1257	1244	1244	1229	1213	1249	1209
141.6	1240	1261	1232	1234	1197	1207	1249
141.7	1249	1249	1249	1262	1208	1236	1242
141.8	1256	1251	1235	1257	1193	1231	1227
141.9	1237	1249	1234	1250	1196	1228	1218
142	1270	1235	1251	1240	1213	1226	1234
142.1	1251	1259	1240	1236	1198	1244	1237
142.2	1266	1268	1244	1253	1229	1196	1201
142.3	1236	1270	1228	1255	1225	1228	1226
142.4	1275	1259	1224	1242	1200	1242	1260
142.5	1268	1258	1245	1231	1224	1238	1222
142.6	1255	1243	1242	1234	1192	1212	1228
142.7	1257	1253	1259	1250	1210	1237	1220
142.8	1261	1250	1246	1248	1195	1223	1246
142.9	1255	1254	1230	1241	1188	1223	1249
143	1271	1244	1222	1251	1201	1232	1243
143.1	1241	1248	1241	1235	1187	1237	1253
143.2	1258	1250	1241	1220	1206	1226	1225
143.3	1270	1214	1237	1233	1213	1219	1237
143.4	1247	1254	1236	1255	1194	1225	1216
143.5	1258	1248	1237	1242	1218	1216	1228
143.6	1268	1250	1223	1223	1196	1203	1220
143.7	1252	1265	1240	1233	1211	1223	1226
143.8	1259	1262	1232	1259	1213	1220	1214
143.9	1249	1259	1245	1243	1219	1230	1236
144	1253	1268	1241	1247	1228	1228	1233
144.1	1250	1251	1249	1239	1210	1211	1210
144.2	1237	1261	1250	1227	1202	1217	1210
144.3	1268	1258	1252	1247	1225	1199	1235
144.4	1262	1251	1255	1229	1231	1246	1216
144.5	1245	1246	1241	1253	1200	1230	1204
144.6	1244	1238	1245	1225	1201	1234	1226
144.7	1265	1258	1246	1232	1224	1257	1220
144.8	1248	1266	1242	1236	1187	1223	1219
144.9	1257	1237	1250	1241	1209	1257	1224
145	1267	1236	1251	1259	1231	1210	1204
145.1	1259	1248	1222	1214	1201	1230	1234
145.2	1257	1221	1251	1246	1204	1226	1224
145.3	1239	1257	1258	1239	1209	1212	1221
145.4	1256	1220	1236	1271	1226	1204	1234
145.5	1275	1234	1239	1249	1238	1236	1202
145.6	1254	1256	1258	1256	1218	1218	1237
145.7	1260	1260	1243	1244	1209	1189	1206
145.8	1257	1262	1241	1231	1206	1201	1220
145.9	1236	1237	1240	1227	1223	1199	1219
146	1254	1239	1235	1210	1218	1232	1210
146.1	1264	1262	1239	1233	1239	1243	1233
146.2	1262	1232	1244	1230	1201	1226	1251
146.3	1247	1249	1225	1238	1209	1230	1205
146.4	1259	1242	1235	1243	1209	1236	1228
146.5	1263	1245	1241	1245	1249	1232	1247
146.6	1240	1234	1263	1255	1211	1245	1227
146.7	1251	1244	1242	1269	1217	1229	1226
146.8	1257	1230	1257	1245	1224	1214	1206
146.9	1259	1248	1243	1234	1223	1245	1235
147	1246	1245	1212	1253	1219	1242	1208
147.1	1262	1261	1249	1237	1211	1233	1214
147.2	1252	1260	1239	1228	1209	1211	1206
147.3	1268	1271	1246	1241	1210	1235	1219
147.4	1240	1253	1232	1235	1214	1213	1227
147.5	1225	1245	1232	1249	1206	1207	1224
147.6	1241	1240	1209	1227	1210	1250	1246
147.7	1257	1250	1252	1223	1209	1203	1232
147.8	1245	1267	1242	1222	1234	1234	1253
147.9	1253	1259	1245	1243	1204	1212	1228
148	1250	1258	1254	1249	1239	1235	1248
148.1	1262	1244	1254	1262	1212	1212	1238
148.2	1240	1245	1239	1246	1239	1212	1216
148.3	1250	1260	1240	1222	1195	1231	1241
148.4	1254	1263	1224	1224	1209	1234	1226
148.5	1231	1259	1213	1258	1209	1218	1222
148.6	1249	1252	1237	1240	1207	1230	1237
148.7	1236	1274	1255	1235	1212	1223	1205
148.8	1240	1253	1255	1257	1227	1209	1255
148.9	1264	1270	1250	1235	1212	1219	1226
149	1260	1278	1237	1238	1218	1208	1251
149.1	1228	1265	1221	1255	1209	1222	1239
149.2	1256	1272	1252	1251	1224	1224	1232
149.3	1283	1260	1248	1262	1216	1207	1232
149.4	1251	1256	1238	1240	1201	1232	1241
149.5	1248	1237	1240	1236	1213	1252	1259
149.6	1270	1258	1237	1230	1233	1227	1244
149.7	1263	1249	1226	1247	1197	1241	1228
149.8	1245	1237	1239	1249	1211	1241	1230
149.9	1268	1253	1220	1240	1223	1232	1212
150	1244	1258	1246	1242	1224	1219	1238
150.1	1248	1245	1239	1252	1226	1242	1228
150.2	1233	1259	1229	1256	1217	1219	1230
150.3	1252	1268	1234	1237	1211	1222	1210
150.4	1235	1280	1212	1230	1207	1215	1229
150.5	1249	1254	1228	1262	1207	1225	1238
150.6	1236	1258	1229	1246	1220	1226	1245
150.7	1242	1268	1252	1244	1249	1212	1228
150.8	1230	1252	1234	1245	1196	1217	1193
150.9	1223	1252	1224	1236	1201	1210	1243
151	1245	1241	1234	1248	1223	1216	1230
151.1	1250	1253	1230	1237	1222	1204	1232
151.2	1245	1259	1245	1253	1214	1232	1233
151.3	1272	1264	1228	1240	1238	1210	1241
151.4	1241	1238	1216	1267	1227	1213	1238
151.5	1249	1266	1238	1247	1222	1208	1237
151.6	1240	1239	1235	1225	1211	1222	1232
151.7	1241	1258	1237	1246	1197	1209	1263
151.8	1249	1250	1237	1247	1204	1236	1223
151.9	1241	1255	1224	1248	1223	1199	1258
152	1253	1245	1234	1255	1219	1220	1220
152.1	1258	1255	1236	1272	1210	1239	1253
152.2	1241	1231	1226	1261	1214	1232	1217
152.3	1251	1262	1235	1274	1201	1215	1220
152.4	1235	1253	1249	1248	1211	1233	1246
152.5	1255	1261	1234	1255	1221	1240	1258
152.6	1251	1267	1250	1232	1221	1228	1238
152.7	1244	1257	1238	1251	1207	1237	1235
152.8	1256	1257	1230	1253	1206	1230	1232
152.9	1257	1263	1239	1244	1201	1255	1238
153	1262	1237	1241	1254	1180	1220	1228
153.1	1248	1267	1239	1244	1220	1212	1223
153.2	1268	1236	1205	1266	1229	1240	1247
153.3	1251	1235	1236	1235	1210	1230	1241
153.4	1244	1262	1215	1252	1216	1229	1223
153.5	1258	1233	1235	1255	1229	1216	1234
153.6	1266	1252	1248	1249	1195	1240	1222
153.7	1248	1250	1241	1245	1211	1208	1228
153.8	1240	1260	1237	1254	1202	1218	1234
153.9	1249	1260	1227	1253	1213	1220	1236
154	1250	1262	1241	1248	1210	1225	1208
154.1	1250	1225	1245	1270	1192	1221	1217
154.2	1250	1275	1246	1260	1211	1254	1259
154.3	1248	1245	1237	1257	1216	1247	1216
154.4	1257	1269	1218	1231	1220	1232	1266
154.5	1264	1244	1239	1247	1199	1220	1228
154.6	1237	1255	1238	1242	1187	1193	1247
154.7	1240	1271	1238	1250	1200	1227	1211
154.8	1245	1266	1255	1248	1211	1217	1237
154.9	1238	1270	1226	1228	1204	1230	1221
155	1263	1272	1250	1257	1218	1241	1213
155.1	1269	1273	1244	1239	1227	1217	1233
155.2	1258	1258	1218	1224	1237	1229	1215
155.3	1265	1255	1232	1247	1217	1230	1213
155.4	1238	1256	1250	1240	1248	1224	1209
155.5	1242	1262	1234	1273	1234	1213	1223
155.6	1253	1239	1246	1260	1194	1220	1212
155.7	1267	1243	1241	1235	1210	1211	1256
155.8	1245	1262	1252	1264	1225	1230	1225
155.9	1251	1262	1246	1244	1240	1221	1220
156	1263	1257	1215	1242	1214	1227	1219
156.1	1270	1244	1217	1243	1233	1227	1249
156.2	1245	1270	1237	1253	1228	1217	1222
156.3	1245	1271	1243	1249	1228	1219	1243
156.4	1260	1278	1246	1221	1218	1225	1231
156.5	1248	1251	1240	1238	1202	1216	1229
156.6	1252	1245	1246	1258	1201	1232	1229
156.7	1237	1241	1218	1271	1213	1232	1231
156.8	1250	1277	1250	1272	1228	1260	1243
156.9	1249	1270	1227	1253	1210	1233	1255
157	1232	1261	1242	1258	1223	1228	1225
157.1	1258	1279	1234	1233	1222	1249	1232
157.2	1254	1262	1239	1255	1240	1218	1210
157.3	1240	1260	1210	1262	1199	1243	1234
157.4	1246	1275	1247	1258	1220	1212	1230
157.5	1227	1246	1214	1267	1224	1207	1215
157.6	1257	1264	1236	1244	1220	1244	1232
157.7	1254	1263	1253	1261	1199	1256	1215
157.8	1242	1282	1248	1264	1231	1241	1239
157.9	1263	1250	1236	1228	1210	1224	1225
158	1259	1259	1241	1271	1197	1197	1217
158.1	1267	1285	1241	1258	1222	1229	1227
158.2	1257	1265	1245	1243	1197	1218	1213
158.3	1248	1250	1240	1253	1196	1217	1222
158.4	1248	1256	1232	1240	1225	1220	1223
158.5	1269	1281	1245	1240	1203	1207	1216
158.6	1269	1260	1253	1258	1210	1227	1231
158.7	1264	1260	1268	1236	1210	1216	1223
158.8	1265	1275	1237	1223	1203	1225	1198
158.9	1263	1269	1234	1215	1210	1241	1192
159	1257	1237	1218	1219	1251	1220	1209
159.1	1260	1280	1236	1242	1216	1223	1226
159.2	1242	1269	1213	1260	1217	1250	1206
159.3	1262	1265	1257	1258	1219	1220	1234
159.4	1256	1254	1246	1255	1194	1206	1213
159.5	1243	1275	1251	1249	1201	1229	1213
159.6	1221	1245	1225	1243	1216	1199	1236
159.7	1237	1256	1255	1254	1235	1216	1228
159.8	1244	1251	1260	1247	1205	1224	1234
159.9	1246	1263	1233	1242	1218	1216	1236
160	1257	1281	1239	1226	1200	1252	1230
160.1	1269	1243	1244	1264	1221	1221	1211
160.2	1255	1272	1240	1227	1242	1225	1223
160.3	1242	1249	1248	1238	1207	1212	1240
160.4	1247	1256	1238	1258	1228	1234	1230
160.5	1244	1260	1234	1235	1213	1213	1261
160.6	1264	1258	1250	1238	1216	1237	1252
160.7	1249	1258	1256	1255	1212	1249	1246
160.8	1254	1256	1233	1231	1192	1197	1224
160.9	1256	1283	1241	1248	1185	1212	1241
161	1250	1282	1250	1256	1169	1217	1248
161.1	1251	1258	1226	1224	1213	1224	1243
161.2	1250	1250	1230	1255	1206	1241	1218
161.3	1238	1245	1257	1233	1208	1224	1231
161.4	1265	1249	1236	1234	1204	1204	1242
161.5	1273	1246	1248	1237	1195	1245	1216
161.6	1239	1252	1242	1227	1214	1214	1238
161.7	1253	1252	1230	1242	1210	1220	1247
161.8	1249	1258	1264	1238	1218	1226	1256
161.9	1245	1249	1240	1242	1222	1218	1226
162	1247	1244	1250	1261	1198	1240	1236
162.1	1256	1283	1235	1267	1222	1230	1226
162.2	1284	1263	1238	1233	1213	1238	1281
162.3	1247	1269	1234	1239	1209	1226	1222
162.4	1263	1267	1249	1231	1197	1206	1242
162.5	1275	1259	1213	1239	1206	1205	1233
162.6	1248	1247	1239	1236	1213	1207	1238
162.7	1253	1271	1252	1237	1225	1218	1210
162.8	1268	1244	1228	1270	1207	1217	1226
162.9	1260	1267	1252	1227	1218	1210	1212
163	1259	1271	1235	1265	1210	1221	1232
163.1	1271	1277	1223	1257	1203	1243	1238
163.2	1266	1259	1256	1254	1183	1241	1223
163.3	1267	1268	1236	1238	1213	1241	1230
163.4	1282	1262	1238	1271	1223	1223	1218
163.5	1265	1253	1247	1254	1201	1210	1230
163.6	1254	1263	1227	1261	1202	1239	1241
163.7	1237	1271	1225	1220	1202	1218	1223
163.8	1236	1266	1219	1240	1214	1224	1223
163.9	1275	1268	1213	1270	1209	1213	1213
164	1271	1267	1247	1253	1242	1229	1229
164.1	1266	1270	1247	1270	1208	1222	1227
164.2	1247	1273	1228	1268	1224	1199	1201
164.3	1241	1254	1235	1229	1251	1219	1228
164.4	1267	1268	1219	1244	1222	1208	1243
164.5	1263	1268	1241	1253	1229	1221	1231
164.6	1270	1258	1222	1260	1236	1223	1221
164.7	1252	1266	1222	1252	1220	1214	1240
164.8	1241	1263	1229	1270	1216	1217	1244
164.9	1269	1255	1224	1235	1202	1217	1255
165	1261	1251	1235	1231	1232	1210	1197
165.1	1256	1268	1221	1239	1200	1245	1243
165.2	1255	1268	1212	1277	1209	1243	1214
165.3	1251	1237	1226	1256	1214	1217	1234
165.4	1273	1254	1211	1224	1224	1231	1248
165.5	1249	1260	1203	1241	1215	1231	1216
165.6	1259	1255	1249	1268	1236	1192	1225
165.7	1230	1259	1239	1251	1203	1203	1224
165.8	1268	1256	1240	1241	1194	1201	1203
165.9	1260	1266	1226	1230	1178	1186	1228
166	1270	1261	1236	1251	1210	1200	1236
166.1	1249	1253	1212	1267	1187	1226	1221
166.2	1241	1250	1230	1255	1188	1201	1232
166.3	1252	1257	1235	1225	1195	1237	1229
166.4	1245	1267	1233	1265	1220	1220	1228
166.5	1263	1273	1225	1236	1214	1225	1220
166.6	1251	1269	1234	1213	1181	1220	1238
166.7	1268	1252	1210	1249	1199	1237	1213
166.8	1245	1271	1233	1216	1218	1204	1214
166.9	1264	1265	1226	1233	1196	1213	1216
167	1247	1271	1218	1255	1205	1212	1217
167.1	1247	1261	1212	1226	1211	1224	1227
167.2	1270	1253	1231	1221	1202	1223	1232
167.3	1259	1266	1228	1239	1234	1220	1208
167.4	1240	1253	1228	1240	1227	1235	1252
167.5	1263	1261	1227	1218	1215	1220	1226
167.6	1259	1269	1240	1241	1219	1223	1220
167.7	1257	1240	1235	1253	1236	1220	1208
167.8	1251	1254	1220	1246	1216	1224	1244
167.9	1249	1240	1227	1243	1195	1228	1240
168	1244	1256	1225	1209	1211	1220	1227
168.1	1247	1253	1254	1225	1187	1223	1232
168.2	1236	1248	1226	1220	1220	1230	1198
168.3	1238	1255	1240	1227	1216	1214	1225
168.4	1260	1264	1208	1229	1211	1193	1226
168.5	1260	1262	1219	1213	1202	1218	1204
168.6	1258	1261	1212	1255	1205	1225	1238
168.7	1266	1239	1244	1228	1211	1213	1228
168.8	1262	1262	1224	1242	1210	1223	1238
168.9	1265	1249	1236	1233	1205	1239	1226
169	1276	1253	1219	1253	1192	1229	1215
169.1	1250	1268	1224	1242	1202	1262	1225
169.2	1248	1248	1228	1225	1212	1228	1217
169.3	1268	1276	1231	1229	1186	1223	1220
169.4	1252	1268	1213	1217	1223	1232	1232
169.5	1272	1269	1204	1249	1222	1228	1211
169.6	1272	1289	1220	1231	1219	1207	1214
169.7	1260	1270	1208	1235	1232	1234	1212
169.8	1247	1260	1226	1230	1211	1227	1220
169.9	1254	1271	1223	1225	1216	1213	1211
170	1248	1249	1228	1224	1224	1219	1238
170.1	1236	1246	1206	1242	1203	1203	1215
170.2	1227	1267	1223	1244	1192	1219	1212
170.3	1256	1260	1233	1240	1219	1226	1212
170.4	1270	1243	1211	1233	1220	1231	1220
170.5	1267	1255	1213	1239	1205	1230	1229
170.6	1222	1256	1213	1213	1205	1262	1194
170.7	1246	1247	1241	1256	1186	1252	1235
170.8	1255	1268	1211	1220	1204	1215	1210
170.9	1273	1242	1228	1216	1209	1231	1194
171	1261	1266	1230	1246	1206	1242	1199
171.1	1247	1237	1218	1235	1215	1202	1219
171.2	1261	1271	1231	1238	1227	1207	1204
171.3	1258	1264	1220	1227	1210	1235	1225
171.4	1253	1277	1233	1240	1235	1217	1239
171.5	1259	1263	1202	1212	1210	1239	1221
171.6	1270	1265	1220	1237	1189	1224	1239
171.7	1251	1266	1228	1234	1215	1224	1211
171.8	1263	1274	1233	1218	1214	1220	1215
171.9	1279	1253	1235	1222	1212	1209	1210
172	1249	1242	1207	1238	1222	1229	1252
172.1	1242	1254	1232	1232	1222	1225	1235
172.2	1260	1265	1229	1244	1239	1213	1224
172.3	1260	1263	1235	1243	1223	1229	1218
172.4	1246	1258	1246	1267	1222	1231	1219
172.5	1267	1271	1241	1261	1208	1214	1226
172.6	1277	1261	1231	1241	1221	1188	1228
172.7	1276	1276	1252	1255	1209	1208	1229
172.8	1254	1285	1244	1236	1238	1221	1210
172.9	1271	1256	1230	1208	1211	1251	1210
173	1274	1263	1232	1221	1236	1229	1212
173.1	1263	1260	1231	1232	1212	1241	1218
173.2	1273	1252	1267	1242	1229	1226	1225
173.3	1256	1257	1239	1233	1233	1223	1220
173.4	1251	1268	1217	1242	1206	1210	1234
173.5	1243	1256	1234	1253	1196	1236	1226
173.6	1256	1241	1243	1241	1220	1244	1213
173.7	1254	1262	1225	1250	1213	1239	1202
173.8	1240	1263	1225	1241	1211	1223	1215
173.9	1266	1268	1237	1237	1195	1249	1232
174	1263	1242	1237	1243	1233	1236	1223
174.1	1253	1251	1230	1228	1211	1225	1217
174.2	1248	1264	1245	1239	1207	1245	1229
174.3	1259	1271	1221	1242	1195	1247	1211
174.4	1262	1252	1241	1226	1229	1242	1226
174.5	1249	1246	1232	1260	1220	1234	1233
174.6	1240	1247	1210	1232	1238	1243	1224
174.7	1256	1251	1227	1255	1207	1201	1223
174.8	1257	1257	1236	1223	1215	1221	1195
174.9	1241	1247	1232	1255	1214	1201	1258
175	1259	1233	1221	1238	1194	1233	1225
175.1	1242	1253	1234	1233	1203	1232	1206
175.2	1233	1265	1209	1251	1219	1250	1228
175.3	1257	1254	1233	1263	1216	1222	1212
175.4	1252	1265	1255	1256	1201	1216	1219
175.5	1249	1259	1195	1219	1225	1239	1216
175.6	1249	1261	1236	1220	1225	1226	1213
175.7	1248	1263	1226	1243	1217	1222	1242
175.8	1244	1254	1226	1231	1191	1266	1227
175.9	1263	1264	1239	1248	1194	1260	1229
176	1253	1251	1252	1234	1243	1223	1215
176.1	1249	1262	1219	1241	1214	1198	1230
176.2	1257	1254	1244	1264	1226	1230	1221
176.3	1263	1255	1232	1231	1234	1210	1226
176.4	1252	1249	1220	1219	1223	1238	1177
176.5	1275	1237	1237	1237	1247	1240	1204
176.6	1259	1268	1235	1242	1226	1215	1205
176.7	1246	1245	1229	1234	1208	1220	1211
176.8	1267	1251	1224	1231	1221	1221	1219
176.9	1262	1258	1225	1235	1208	1225	1208
177	1273	1263	1239	1217	1204	1227	1226
177.1	1275	1260	1236	1215	1211	1244	1226
177.2	1273	1259	1214	1221	1221	1226	1227
177.3	1267	1263	1217	1227	1216	1223	1248
177.4	1255	1260	1233	1241	1212	1234	1196
177.5	1245	1286	1242	1228	1229	1239	1235
177.6	1267	1241	1248	1232	1215	1219	1224
177.7	1279	1246	1236	1246	1245	1211	1237
177.8	1269	1262	1238	1242	1211	1222	1245
177.9	1255	1255	1238	1237	1207	1235	1228
178	1277	1258	1240	1251	1193	1216	1242
178.1	1253	1260	1231	1244	1222	1212	1222
178.2	1274	1256	1220	1239	1230	1226	1208
178.3	1265	1246	1227	1217	1192	1217	1221
178.4	1255	1237	1230	1249	1193	1221	1232
178.5	1262	1264	1224	1247	1216	1216	1218
178.6	1251	1266	1243	1240	1206	1223	1236
178.7	1261	1271	1224	1225	1204	1228	1231
178.8	1256	1228	1234	1240	1214	1207	1231
178.9	1242	1245	1222	1232	1216	1234	1238
179	1249	1236	1236	1243	1204	1197	1265
179.1	1259	1244	1248	1228	1212	1203	1201
179.2	1244	1236	1233	1248	1207	1227	1208
179.3	1263	1252	1206	1225	1211	1232	1227
179.4	1250	1267	1223	1232	1233	1227	1205
179.5	1250	1238	1250	1258	1237	1230	1229
179.6	1247	1263	1224	1237	1215	1236	1201
179.7	1283	1256	1243	1245	1204	1221	1218
179.8	1255	1249	1227	1239	1223	1223	1230
179.9	1243	1258	1220	1240	1183	1205	1206
180	1251	1252	1225	1225	1214	1236	1228
180.1	1275	1255	1235	1245	1207	1235	1209
180.2	1237	1240	1225	1233	1220	1229	1222
180.3	1247	1253	1229	1216	1193	1232	1187
180.4	1263	1252	1237	1217	1210	1237	1232
180.5	1270	1247	1225	1240	1220	1222	1231
180.6	1258	1230	1226	1255	1221	1240	1214
180.7	1279	1238	1231	1227	1201	1200	1227
180.8	1260	1235	1223	1238	1199	1221	1250
180.9	1272	1251	1240	1221	1202	1236	1260
181	1268	1235	1236	1255	1234	1227	1254
181.1	1258	1243	1260	1246	1211	1246	1241
181.2	1272	1262	1226	1254	1212	1206	1228
181.3	1259	1252	1240	1261	1229	1203	1232
181.4	1249	1238	1242	1251	1231	1235	1194
181.5	1260	1223	1227	1243	1232	1199	1219
181.6	1272	1232	1231	1249	1223	1227	1217
181.7	1250	1249	1227	1241	1223	1225	1220
181.8	1230	1250	1247	1231	1228	1229	1228
181.9	1253	1238	1238	1269	1193	1229	1215
182	1251	1248	1216	1243	1216	1233	1230
182.1	1271	1244	1237	1239	1196	1216	1201
182.2	1265	1275	1207	1251	1223	1217	1220
182.3	1241	1257	1243	1246	1225	1233	1232
182.4	1260	1248	1229	1256	1201	1218	1225
182.5	1257	1258	1210	1233	1223	1233	1205
182.6	1264	1265	1236	1259	1226	1230	1225
182.7	1247	1243	1216	1242	1183	1218	1209
182.8	1264	1273	1224	1229	1224	1237	1198
182.9	1250	1252	1235	1222	1225	1216	1225
183	1277	1273	1236	1250	1230	1208	1213
183.1	1263	1236	1218	1261	1211	1225	1228
183.2	1257	1249	1221	1248	1236	1244	1217
183.3	1250	1273	1232	1243	1226	1195	1220
183.4	1247	1262	1221	1273	1231	1242	1201
183.5	1259	1268	1240	1252	1243	1226	1216
183.6	1259	1241	1224	1232	1187	1233	1235
183.7	1260	1259	1224	1237	1209	1245	1238
183.8	1234	1252	1242	1253	1215	1214	1238
183.9	1245	1250	1220	1231	1232	1199	1198
184	1254	1265	1215	1249	1194	1252	1235
184.1	1246	1247	1221	1239	1189	1236	1223
184.2	1258	1244	1218	1231	1217	1234	1205
184.3	1237	1238	1235	1235	1216	1251	1222
184.4	1264	1248	1234	1254	1240	1241	1212
184.5	1260	1257	1244	1266	1227	1245	1227
184.6	1256	1248	1238	1250	1238	1197	1197
184.7	1259	1278	1241	1260	1229	1237	1198
184.8	1245	1251	1236	1258	1199	1255	1221
184.9	1251	1272	1228	1236	1198	1249	1193
185	1261	1257	1221	1228	1226	1255	1194
185.1	1234	1253	1247	1239	1212	1229	1213
185.2	1262	1261	1235	1229	1203	1254	1219
185.3	1242	1264	1232	1256	1238	1237	1242
185.4	1242	1267	1248	1240	1225	1211	1232
185.5	1249	1261	1238	1235	1206	1234	1206
185.6	1256	1236	1224	1240	1187	1274	1198
185.7	1260	1250	1233	1233	1207	1219	1182
185.8	1251	1277	1223	1240	1202	1238	1218
185.9	1243	1256	1227	1221	1217	1226	1214
186	1271	1247	1232	1247	1244	1259	1204
186.1	1243	1283	1237	1254	1207	1230	1224
186.2	1261	1263	1237	1214	1218	1213	1203
186.3	1256	1268	1242	1250	1224	1211	1206
186.4	1229	1249	1251	1234	1223	1242	1236
186.5	1246	1265	1237	1242	1218	1215	1205
186.6	1267	1265	1249	1254	1237	1243	1205
186.7	1250	1272	1238	1254	1205	1234	1220
186.8	1235	1251	1257	1243	1207	1226	1236
186.9	1255	1246	1252	1238	1214	1236	1236
187	1252	1276	1243	1246	1222	1227	1216
187.1	1245	1269	1238	1260	1227	1250	1227
187.2	1243	1257	1235	1250	1204	1215	1219
187.3	1267	1262	1236	1250	1231	1210	1218
187.4	1271	1253	1253	1231	1221	1233	1242
187.5	1261	1266	1238	1247	1225	1223	1204
187.6	1251	1248	1232	1245	1211	1246	1215
187.7	1247	1259	1240	1236	1205	1226	1211
187.8	1247	1257	1216	1248	1240	1228	1216
187.9	1241	1277	1229	1246	1229	1257	1193
188	1271	1249	1239	1249	1212	1224	1211
188.1	1241	1257	1241	1243	1240	1256	1222
188.2	1252	1253	1246	1259	1198	1241	1183
188.3	1232	1265	1248	1231	1190	1240	1189
188.4	1256	1238	1233	1225	1228	1238	1225
188.5	1237	1258	1218	1217	1191	1216	1207
188.6	1239	1254	1210	1236	1197	1213	1196
188.7	1250	1250	1222	1221	1192	1248	1238
188.8	1254	1267	1252	1252	1222	1218	1197
188.9	1246	1247	1262	1249	1194	1219	1248
189	1242	1263	1232	1264	1221	1210	1241
189.1	1245	1249	1240	1243	1204	1229	1218
189.2	1236	1256	1223	1273	1206	1238	1242
189.3	1267	1251	1243	1242	1230	1227	1216
189.4	1248	1266	1239	1246	1214	1212	1231
189.5	1251	1267	1256	1250	1213	1224	1222
189.6	1232	1251	1201	1252	1219	1221	1178
189.7	1243	1263	1234	1257	1232	1228	1202
189.8	1260	1260	1224	1235	1213	1234	1197
189.9	1245	1273	1226	1260	1196	1241	1217
190	1267	1255	1238	1243	1207	1222	1212
190.1	1237	1292	1222	1265	1204	1241	1191
190.2	1249	1269	1232	1255	1197	1200	1184
190.3	1253	1268	1241	1250	1219	1237	1212
190.4	1251	1254	1250	1233	1198	1223	1210
190.5	1223	1246	1230	1244	1228	1247	1201
190.6	1254	1256	1207	1240	1187	1237	1217
190.7	1247	1292	1251	1255	1209	1248	1221
190.8	1240	1282	1235	1257	1188	1218	1211
190.9	1252	1278	1213	1221	1194	1217	1232
191	1246	1258	1231	1237	1195	1245	1239
191.1	1220	1264	1237	1251	1191	1229	1188
191.2	1228	1265	1235	1236	1194	1243	1201
191.3	1259	1286	1230	1234	1215	1215	1199
191.4	1245	1265	1261	1265	1201	1211	1219
191.5	1247	1265	1212	1257	1182	1223	1218
191.6	1238	1285	1246	1257	1194	1235	1214
191.7	1257	1265	1250	1241	1205	1239	1205
191.8	1245	1262	1238	1249	1183	1251	1199
191.9	1253	1272	1231	1256	1219	1271	1211
192	1258	1263	1223	1253	1205	1237	1227
192.1	1272	1272	1253	1254	1201	1222	1197
192.2	1248	1277	1251	1236	1193	1235	1208
192.3	1255	1280	1258	1249	1191	1235	1216
192.4	1236	1263	1228	1252	1198	1231	1200
192.5	1265	1257	1222	1251	1175	1231	1205
192.6	1256	1249	1229	1228	1207	1220	1214
192.7	1258	1249	1230	1227	1203	1207	1248
192.8	1260	1273	1255	1245	1205	1240	1207
192.9	1264	1259	1243	1259	1195	1237	1208
193	1239	1257	1261	1234	1195	1229	1212
193.1	1277	1276	1234	1269	1210	1234	1210
193.2	1240	1238	1253	1233	1209	1234	1208
193.3	1260	1237	1215	1267	1204	1238	1196
193.4	1258	1277	1240	1228	1215	1231	1216
193.5	1257	1259	1249	1239	1243	1241	1211
193.6	1262	1264	1240	1258	1229	1229	1198
193.7	1253	1283	1234	1239	1204	1232	1201
193.8	1245	1274	1281	1275	1210	1236	1210
193.9	1271	1252	1254	1249	1204	1237	1213
194	1268	1253	1257	1255	1205	1230	1204
194.1	1247	1281	1238	1235	1224	1223	1209
194.2	1260	1279	1229	1246	1220	1216	1203
194.3	1254	1264	1235	1243	1230	1214	1220
194.4	1255	1252	1233	1247	1195	1222	1205
194.5	1256	1240	1248	1222	1230	1222	1225
194.6	1244	1246	1259	1222	1230	1224	1222
194.7	1263	1260	1248	1245	1220	1214	1192
194.8	1248	1286	1251	1244	1210	1231	1195
194.9	1243	1272	1247	1248	1187	1219	1180
195	1254	1260	1221	1270	1193	1230	1220
195.1	1240	1261	1234	1239	1217	1226	1197
195.2	1256	1259	1263	1244	1201	1224	1229
195.3	1259	1248	1226	1247	1216	1214	1220
195.4	1242	1257	1266	1233	1197	1235	1210
195.5	1266	1255	1254	1231	1221	1228	1200
195.6	1254	1254	1243	1232	1206	1220	1218
195.7	1247	1217	1245	1263	1201	1228	1200
195.8	1252	1265	1231	1244	1236	1212	1219
195.9	1259	1259	1233	1267	1209	1243	1186
196	1249	1246	1243	1250	1207	1231	1191
196.1	1264	1264	1243	1245	1194	1219	1231
196.2	1264	1248	1245	1271	1213	1228	1223
196.3	1249	1260	1238	1268	1222	1208	1205
196.4	1266	1269	1261	1234	1212	1210	1213
196.5	1260	1258	1225	1252	1221	1199	1225
196.6	1268	1253	1247	1263	1212	1240	1174
196.7	1259	1252	1250	1226	1196	1215	1185
196.8	1259	1248	1237	1260	1193	1237	1182
196.9	1254	1271	1216	1236	1192	1230	1194
197	1246	1264	1255	1255	1210	1232	1229
197.1	1261	1258	1230	1250	1218	1230	1196
197.2	1248	1255	1234	1249	1200	1224	1204
197.3	1235	1250	1265	1220	1197	1231	1188
197.4	1235	1266	1230	1231	1190	1228	1200
197.5	1255	1266	1257	1233	1186	1231	1209
197.6	1274	1249	1230	1238	1201	1229	1214
197.7	1257	1258	1236	1232	1193	1208	1199
197.8	1258	1230	1235	1232	1183	1229	1207
197.9	1259	1244	1240	1265	1202	1237	1207
198	1247	1250	1257	1238	1172	1207	1219
198.1	1257	1274	1248	1241	1202	1205	1212
198.2	1258	1266	1234	1245	1199	1252	1211
198.3	1248	1260	1229	1235	1210	1221	1204
198.4	1260	1246	1246	1248	1189	1230	1229
198.5	1267	1268	1236	1242	1172	1214	1228
198.6	1253	1257	1236	1217	1216	1236	1205
198.7	1256	1276	1235	1251	1197	1204	1221
198.8	1242	1260	1245	1243	1215	1221	1229
198.9	1259	1259	1245	1247	1217	1231	1228
199	1247	1245	1239	1220	1203	1250	1193
199.1	1258	1280	1238	1228	1215	1228	1220
199.2	1254	1248	1239	1230	1203	1227	1204
199.3	1260	1245	1245	1252	1203	1232	1226
199.4	1258	1270	1252	1240	1218	1250	1209
199.5	1264	1250	1239	1255	1218	1227	1196
199.6	1277	1256	1219	1236	1220	1213	1216
199.7	1233	1268	1256	1226	1209	1214	1190
199.8	1251	1261	1245	1251	1217	1234	1191
[truncated: 28,002 more rows]

## Sheet: P-W Hbond
Time(ns)	pw3	pw20	pw37	pw60	pw70	pw80	pw95
0	5622	5528	5445	5334	5254	5213	5147
0.1	5848	5786	5694	5563	5499	5370	5288
0.2	5954	5856	5740	5655	5530	5441	5360
0.3	5973	5854	5770	5607	5476	5448	5336
0.4	5928	5892	5768	5632	5565	5421	5303
0.5	6003	5907	5787	5564	5590	5471	5364
0.6	5978	5847	5750	5556	5573	5431	5317
0.7	6014	5923	5823	5638	5453	5438	5339
0.8	5994	5870	5838	5693	5543	5355	5319
0.9	5929	5961	5799	5559	5489	5395	5270
1	5941	5926	5816	5598	5467	5393	5311
1.1	6010	5926	5816	5624	5465	5466	5325
1.2	5936	5936	5782	5620	5438	5464	5297
1.3	6006	5947	5761	5620	5432	5492	5375
1.4	6021	5833	5803	5614	5459	5444	5252
1.5	6015	5886	5898	5630	5493	5507	5323
1.6	6087	5902	5798	5635	5462	5508	5255
1.7	5977	5930	5876	5556	5536	5464	5263
1.8	6040	5968	5827	5638	5536	5413	5238
1.9	6047	5909	5765	5629	5438	5486	5171
2	6039	5894	5853	5628	5528	5411	5256
2.1	6017	5892	5847	5653	5553	5495	5236
2.2	6024	5935	5857	5650	5497	5442	5321
2.3	6022	5851	5812	5654	5491	5505	5289
2.4	6048	5850	5781	5639	5463	5468	5268
2.5	5977	5919	5921	5600	5445	5440	5274
2.6	6057	5907	5799	5640	5436	5388	5214
2.7	6082	5850	5764	5610	5463	5444	5304
2.8	6060	5999	5823	5641	5502	5424	5217
2.9	6042	5925	5816	5560	5575	5392	5262
3	6089	5934	5811	5569	5479	5414	5193
3.1	6080	5889	5826	5601	5483	5347	5287
3.2	6074	5873	5809	5655	5512	5354	5347
3.3	6096	5874	5792	5675	5498	5390	5303
3.4	6069	5928	5791	5549	5464	5474	5298
3.5	6083	5939	5776	5637	5462	5390	5248
3.6	6098	5925	5786	5632	5504	5502	5226
3.7	6123	5843	5803	5649	5517	5398	5193
3.8	6076	5928	5853	5604	5506	5470	5241
3.9	6103	5922	5873	5590	5550	5515	5169
4	6107	5942	5793	5625	5545	5418	5224
4.1	6091	5904	5754	5592	5458	5468	5235
4.2	6102	5918	5743	5625	5555	5445	5196
4.3	6101	5946	5785	5606	5536	5525	5269
4.4	6084	5959	5835	5532	5540	5423	5276
4.5	6021	5924	5793	5578	5548	5487	5211
4.6	6142	5864	5792	5581	5454	5480	5240
4.7	6108	5942	5730	5575	5425	5407	5222
4.8	6087	5965	5826	5511	5433	5399	5221
4.9	6072	5927	5766	5581	5535	5396	5227
5	6060	5927	5806	5600	5545	5364	5262
5.1	6068	5975	5766	5554	5504	5456	5269
5.2	6056	5992	5773	5572	5471	5478	5105
5.3	6048	5970	5783	5611	5503	5449	5249
5.4	6065	5954	5750	5598	5552	5502	5216
5.5	6067	5924	5662	5603	5431	5491	5218
5.6	6127	5935	5776	5631	5448	5388	5217
5.7	6152	5931	5785	5574	5486	5487	5181
5.8	6091	5942	5761	5574	5535	5417	5137
5.9	6120	5980	5793	5661	5542	5442	5222
6	6041	5890	5761	5637	5568	5426	5216
6.1	6061	5896	5770	5601	5546	5460	5227
6.2	6070	5990	5883	5566	5521	5412	5244
6.3	6060	5951	5734	5577	5457	5401	5248
6.4	6040	5980	5752	5625	5556	5409	5213
6.5	6036	5971	5735	5646	5540	5418	5217
6.6	6064	5965	5745	5613	5540	5486	5168
6.7	6091	5964	5784	5580	5490	5428	5193
6.8	6147	5992	5780	5572	5422	5396	5218
6.9	6141	5936	5772	5553	5509	5334	5223
7	6128	5961	5794	5547	5442	5409	5291
7.1	6129	5874	5759	5508	5477	5373	5196
7.2	6114	5931	5785	5556	5534	5344	5137
7.3	6061	5975	5731	5538	5507	5391	5144
7.4	6154	5914	5778	5609	5443	5333	5180
7.5	6115	5941	5780	5551	5522	5358	5179
7.6	6102	5923	5760	5580	5432	5381	5207
7.7	6126	5984	5717	5630	5480	5357	5143
7.8	6169	5916	5764	5524	5470	5370	5161
7.9	6090	5907	5797	5589	5511	5433	5186
8	6106	5917	5786	5638	5445	5384	5196
8.1	6161	5883	5762	5572	5433	5424	5234
8.2	6142	5950	5754	5636	5436	5318	5110
8.3	6193	5890	5769	5578	5486	5358	5220
8.4	6183	5903	5782	5573	5458	5361	5224
8.5	6133	5929	5738	5626	5484	5317	5261
8.6	6145	5938	5795	5598	5467	5328	5236
8.7	6112	5972	5783	5568	5426	5337	5260
8.8	6134	5880	5831	5540	5425	5399	5142
8.9	6145	5887	5782	5642	5475	5429	5258
9	6183	5960	5796	5605	5436	5447	5237
9.1	6212	5919	5719	5604	5408	5504	5196
9.2	6150	5903	5799	5715	5493	5481	5204
9.3	6159	5930	5842	5641	5514	5428	5155
9.4	6135	5923	5755	5638	5418	5386	5204
9.5	6111	5934	5777	5649	5488	5446	5203
9.6	6137	5945	5789	5578	5553	5418	5223
9.7	6126	5952	5797	5637	5481	5410	5236
9.8	6093	5944	5792	5591	5574	5475	5264
9.9	6181	5901	5746	5618	5452	5441	5167
10	6193	5915	5795	5565	5454	5409	5197
10.1	6105	5929	5740	5626	5439	5317	5239
10.2	6188	5959	5720	5639	5529	5376	5223
10.3	6134	5881	5739	5645	5535	5391	5180
10.4	6101	5931	5792	5566	5551	5360	5218
10.5	6202	5886	5815	5621	5466	5317	5205
10.6	6140	5894	5697	5532	5474	5415	5275
10.7	6173	5969	5751	5608	5513	5400	5288
10.8	6148	5950	5819	5571	5559	5436	5206
10.9	6150	5975	5764	5666	5565	5450	5174
11	6137	5990	5753	5641	5562	5419	5171
11.1	6157	5951	5794	5637	5509	5476	5143
11.2	6122	5983	5766	5512	5499	5453	5190
11.3	6149	5971	5841	5626	5568	5352	5174
11.4	6151	5972	5738	5673	5572	5364	5294
11.5	6140	5942	5884	5650	5555	5358	5214
11.6	6139	5916	5739	5613	5511	5428	5131
11.7	6137	5989	5776	5553	5583	5408	5238
11.8	6181	5923	5782	5624	5484	5444	5117
11.9	6110	5884	5769	5662	5486	5440	5132
12	6161	6004	5784	5602	5567	5413	5246
12.1	6117	5976	5756	5603	5493	5410	5150
12.2	6080	5962	5796	5521	5548	5386	5218
12.3	6063	5894	5744	5606	5503	5327	5153
12.4	6064	5969	5752	5635	5456	5406	5193
12.5	6089	5972	5774	5635	5551	5388	5203
12.6	6085	5965	5806	5643	5592	5411	5215
12.7	6078	5974	5836	5629	5556	5435	5206
12.8	6095	5985	5843	5572	5531	5450	5160
12.9	6158	5926	5830	5646	5492	5355	5207
13	6185	5921	5796	5637	5600	5356	5212
13.1	6025	5976	5801	5614	5464	5479	5212
13.2	6074	6006	5803	5683	5552	5442	5189
13.3	6102	5963	5796	5541	5559	5343	5229
13.4	6115	5924	5798	5580	5515	5419	5154
13.5	6048	5888	5730	5625	5544	5444	5184
13.6	6099	5983	5771	5624	5528	5438	5258
13.7	6062	5931	5806	5596	5515	5419	5201
13.8	6109	5940	5699	5627	5639	5401	5254
13.9	6129	5931	5798	5603	5520	5445	5177
14	6133	5950	5770	5627	5502	5371	5184
14.1	6090	5897	5767	5680	5512	5322	5233
14.2	6086	5912	5833	5647	5501	5354	5275
14.3	6095	5894	5826	5652	5517	5458	5224
14.4	6105	5871	5804	5651	5483	5443	5245
14.5	6132	5864	5762	5669	5481	5416	5145
14.6	6150	5897	5797	5603	5535	5426	5149
14.7	6074	5805	5864	5618	5417	5403	5156
14.8	6055	5877	5729	5584	5494	5450	5237
14.9	6119	5909	5774	5547	5549	5406	5191
15	6109	5910	5801	5545	5527	5363	5213
15.1	6103	5902	5748	5601	5507	5440	5162
15.2	6147	5882	5707	5552	5485	5382	5178
15.3	6136	5917	5761	5582	5445	5390	5212
15.4	6111	5971	5775	5570	5593	5341	5143
15.5	6110	5892	5776	5563	5464	5433	5162
15.6	6050	5931	5835	5669	5510	5366	5186
15.7	6139	5875	5764	5637	5466	5379	5144
15.8	6162	5948	5741	5659	5491	5474	5203
15.9	6214	5923	5734	5605	5516	5500	5172
16	6139	5955	5731	5637	5547	5423	5161
16.1	6126	5833	5670	5642	5523	5354	5160
16.2	6183	5891	5694	5631	5546	5390	5196
16.3	6178	5924	5734	5688	5573	5340	5237
16.4	6114	5897	5726	5690	5579	5464	5162
16.5	6137	5846	5710	5671	5491	5440	5127
16.6	6148	5871	5794	5699	5480	5435	5271
16.7	6116	5921	5725	5670	5566	5371	5192
16.8	6104	5863	5796	5669	5450	5442	5163
16.9	6075	5927	5817	5543	5473	5430	5204
17	6027	5936	5738	5705	5496	5440	5216
17.1	6110	5932	5681	5684	5456	5440	5118
17.2	6100	6049	5779	5641	5474	5509	5262
17.3	6098	5936	5770	5669	5510	5375	5231
17.4	6144	5961	5767	5618	5538	5469	5155
17.5	6134	5960	5740	5738	5529	5411	5240
17.6	6117	5902	5759	5668	5428	5351	5210
17.7	6116	5860	5726	5620	5597	5413	5153
17.8	6168	5907	5766	5699	5535	5370	5185
17.9	6102	5964	5736	5728	5509	5425	5198
18	6198	6005	5678	5674	5451	5379	5190
18.1	6189	5969	5791	5623	5525	5341	5286
18.2	6210	5942	5768	5654	5520	5374	5152
18.3	6192	5908	5717	5636	5502	5402	5202
18.4	6191	5884	5750	5629	5554	5378	5249
18.5	6136	5938	5788	5646	5485	5385	5246
18.6	6124	5949	5759	5620	5484	5414	5307
18.7	6101	5977	5755	5622	5463	5404	5245
18.8	6099	5948	5740	5619	5491	5370	5259
18.9	6110	5918	5757	5573	5489	5386	5286
19	6159	6029	5722	5545	5498	5532	5230
19.1	6160	5985	5751	5684	5391	5341	5220
19.2	6157	5928	5710	5619	5518	5435	5340
19.3	6128	5903	5702	5600	5468	5400	5222
19.4	6143	5934	5743	5594	5454	5434	5206
19.5	6139	5957	5719	5646	5412	5418	5205
19.6	6250	5938	5761	5551	5429	5344	5174
19.7	6148	5966	5749	5605	5453	5420	5216
19.8	6165	5962	5745	5608	5519	5430	5178
19.9	6118	5922	5752	5626	5492	5335	5171
20	6113	5900	5770	5615	5473	5401	5185
20.1	6110	5931	5742	5605	5510	5405	5143
20.2	6135	5892	5736	5607	5484	5309	5183
20.3	6109	5925	5767	5593	5407	5383	5202
20.4	6122	5897	5749	5571	5479	5358	5146
20.5	6129	5909	5714	5536	5487	5355	5220
20.6	6069	5922	5782	5560	5533	5404	5178
20.7	6161	5907	5762	5602	5568	5415	5183
20.8	6125	5972	5713	5577	5571	5427	5152
20.9	6133	5924	5780	5630	5537	5407	5134
21	6108	5955	5711	5624	5580	5421	5214
21.1	6119	5849	5758	5548	5473	5454	5166
21.2	6109	5872	5696	5576	5478	5371	5216
21.3	6151	5920	5722	5532	5437	5431	5243
21.4	6113	5882	5734	5594	5543	5460	5234
21.5	6123	5903	5729	5580	5487	5426	5184
21.6	6146	5882	5713	5561	5522	5424	5168
21.7	6202	5915	5673	5626	5576	5382	5234
21.8	6112	5930	5754	5626	5479	5434	5343
21.9	6164	5954	5787	5547	5511	5426	5280
22	6191	5915	5752	5625	5495	5413	5282
22.1	6218	5925	5799	5648	5560	5360	5211
22.2	6134	5939	5749	5628	5504	5366	5326
22.3	6230	5922	5751	5645	5523	5360	5274
22.4	6197	5956	5777	5544	5461	5353	5212
22.5	6153	5985	5783	5603	5535	5326	5144
22.6	6166	5924	5750	5650	5467	5380	5277
22.7	6153	5999	5790	5632	5502	5372	5184
22.8	6099	5975	5780	5620	5443	5463	5173
22.9	6115	5921	5777	5581	5538	5410	5216
23	6188	5981	5750	5646	5496	5363	5148
23.1	6215	5977	5740	5607	5462	5392	5220
23.2	6166	5947	5782	5594	5464	5492	5201
23.3	6172	5862	5783	5547	5414	5375	5131
23.4	6147	5909	5716	5689	5447	5389	5170
23.5	6168	5903	5762	5660	5499	5392	5140
23.6	6173	5924	5763	5719	5416	5351	5139
23.7	6150	5962	5768	5679	5474	5372	5184
23.8	6159	5939	5719	5574	5455	5434	5174
23.9	6169	5952	5813	5586	5467	5471	5150
24	6097	5921	5742	5574	5492	5403	5187
24.1	6148	5959	5767	5716	5468	5406	5195
24.2	6133	5999	5767	5680	5456	5327	5287
24.3	6138	5915	5774	5674	5415	5326	5158
24.4	6134	5923	5715	5673	5475	5360	5268
24.5	6165	5979	5670	5685	5490	5468	5215
24.6	6118	5956	5728	5637	5479	5384	5190
24.7	6145	5981	5789	5719	5522	5366	5238
24.8	6129	5905	5760	5583	5466	5403	5164
24.9	6133	5842	5816	5618	5469	5378	5100
25	6101	5952	5728	5612	5465	5394	5104
25.1	6181	5939	5782	5642	5470	5397	5178
25.2	6139	5946	5752	5538	5426	5414	5181
25.3	6129	5905	5772	5585	5429	5521	5154
25.4	6092	5860	5698	5593	5495	5457	5194
25.5	6127	5888	5771	5653	5539	5397	5259
25.6	6122	5833	5781	5700	5476	5400	5285
25.7	6084	5896	5676	5726	5467	5420	5264
25.8	6203	5901	5799	5673	5475	5447	5220
25.9	6149	5961	5697	5732	5493	5389	5264
26	6164	5891	5764	5632	5421	5338	5254
26.1	6099	5932	5721	5625	5509	5426	5289
26.2	6162	5885	5689	5672	5497	5357	5244
26.3	6185	5865	5763	5696	5476	5369	5264
26.4	6123	5923	5775	5730	5486	5385	5254
26.5	6212	5961	5722	5689	5458	5435	5252
26.6	6107	6000	5760	5637	5433	5384	5191
26.7	6148	5912	5745	5585	5436	5373	5223
26.8	6144	5840	5748	5684	5455	5383	5181
26.9	6127	5919	5766	5627	5434	5453	5151
27	6075	5787	5701	5692	5446	5388	5157
27.1	6131	5884	5699	5679	5477	5394	5189
27.2	6135	5927	5754	5601	5414	5361	5240
27.3	6170	5873	5799	5619	5433	5399	5183
27.4	6136	5938	5759	5615	5451	5401	5234
27.5	6201	5938	5699	5612	5393	5403	5208
27.6	6115	5918	5755	5606	5420	5404	5238
27.7	6138	5921	5770	5561	5428	5414	5233
27.8	6134	5872	5753	5561	5493	5357	5187
27.9	6096	5860	5767	5597	5490	5417	5225
28	6123	5901	5775	5663	5480	5442	5270
28.1	6178	5932	5845	5613	5447	5505	5123
28.2	6113	5844	5738	5614	5407	5423	5238
28.3	6175	5889	5740	5623	5431	5310	5223
28.4	6156	5893	5717	5578	5418	5359	5276
28.5	6149	5893	5785	5624	5398	5445	5226
28.6	6157	5873	5780	5625	5433	5411	5219
28.7	6131	5932	5731	5567	5486	5343	5234
28.8	6143	5895	5757	5618	5374	5442	5261
28.9	6149	5901	5768	5675	5411	5480	5192
29	6032	5934	5790	5686	5493	5417	5289
29.1	6187	5916	5707	5604	5457	5426	5218
29.2	6175	5842	5745	5653	5473	5463	5161
29.3	6160	5896	5719	5654	5420	5470	5195
29.4	6146	5874	5725	5589	5406	5364	5217
29.5	6145	5887	5706	5598	5462	5457	5223
29.6	6172	5923	5725	5630	5466	5428	5203
29.7	6169	5892	5708	5603	5356	5439	5176
29.8	6089	5856	5794	5586	5377	5450	5190
29.9	6195	5957	5705	5630	5425	5476	5175
30	6161	5895	5694	5637	5348	5444	5261
30.1	6116	5875	5685	5596	5370	5497	5208
30.2	6114	5909	5690	5611	5417	5449	5185
30.3	6163	5898	5765	5644	5466	5433	5176
30.4	6127	5963	5804	5635	5457	5520	5147
30.5	6132	5896	5709	5619	5446	5478	5192
30.6	6086	5913	5725	5656	5389	5531	5263
30.7	6180	5881	5750	5536	5428	5426	5267
30.8	6150	5884	5840	5593	5406	5473	5233
30.9	6136	5925	5763	5619	5370	5492	5226
31	6175	5911	5715	5569	5386	5420	5243
31.1	6112	5843	5775	5664	5369	5484	5203
31.2	6141	5880	5701	5678	5408	5509	5241
31.3	6184	5929	5736	5589	5436	5479	5203
31.4	6128	5915	5755	5651	5394	5415	5300
31.5	6210	5977	5756	5565	5399	5401	5230
31.6	6147	5911	5696	5609	5449	5507	5319
31.7	6124	5958	5765	5571	5389	5379	5211
31.8	6183	5873	5695	5546	5342	5423	5243
31.9	6175	5868	5735	5593	5430	5377	5206
32	6183	5912	5693	5611	5445	5414	5205
32.1	6145	5886	5783	5590	5404	5427	5272
32.2	6147	5901	5767	5599	5436	5479	5154
32.3	6171	5895	5764	5641	5498	5433	5238
32.4	6120	5887	5727	5536	5407	5406	5295
32.5	6221	5968	5749	5608	5491	5325	5237
32.6	6127	5903	5743	5563	5417	5412	5307
32.7	6132	5916	5718	5565	5446	5421	5223
32.8	6155	5881	5754	5614	5410	5385	5290
32.9	6090	5938	5717	5584	5543	5362	5215
33	6137	5915	5734	5593	5491	5402	5312
33.1	6135	5917	5748	5590	5464	5343	5275
33.2	6142	5843	5723	5617	5452	5441	5248
33.3	6130	5934	5653	5607	5499	5419	5228
33.4	6140	5896	5669	5595	5441	5461	5223
33.5	6112	5916	5682	5565	5491	5393	5257
33.6	6133	5930	5752	5583	5465	5371	5221
33.7	6143	5898	5702	5583	5540	5454	5201
33.8	6140	5955	5674	5580	5425	5436	5213
33.9	6139	5941	5672	5605	5505	5374	5274
34	6131	5818	5730	5680	5414	5359	5231
34.1	6154	5886	5713	5596	5415	5330	5192
34.2	6159	5896	5739	5648	5480	5372	5165
34.3	6090	5880	5677	5625	5458	5370	5260
34.4	6099	5962	5634	5594	5443	5394	5292
34.5	6043	5880	5737	5552	5529	5411	5255
34.6	6107	5879	5687	5602	5501	5347	5179
34.7	6132	5880	5686	5572	5510	5428	5302
34.8	6068	5890	5752	5573	5495	5359	5216
34.9	6190	5927	5714	5553	5536	5444	5138
35	6107	5920	5769	5489	5477	5398	5151
35.1	6107	5909	5751	5564	5527	5409	5179
35.2	6169	5829	5780	5586	5457	5360	5188
35.3	6080	5940	5805	5573	5465	5462	5185
35.4	6116	5896	5755	5531	5521	5463	5225
35.5	6065	5916	5715	5550	5541	5399	5254
35.6	6123	5888	5753	5585	5446	5394	5237
35.7	6168	5870	5685	5604	5403	5471	5245
35.8	6162	5862	5735	5634	5463	5460	5218
35.9	6063	5943	5748	5575	5422	5340	5185
36	6062	5913	5750	5587	5507	5431	5151
36.1	6115	5888	5713	5566	5515	5391	5115
36.2	6133	5917	5709	5608	5486	5404	5165
36.3	6113	5920	5749	5507	5508	5403	5197
36.4	6110	5905	5694	5616	5420	5337	5210
36.5	6171	5901	5750	5612	5511	5317	5206
36.6	6153	5898	5781	5591	5481	5369	5229
36.7	6138	5864	5765	5563	5498	5387	5148
36.8	6122	5906	5785	5507	5504	5465	5189
36.9	6116	5963	5761	5562	5470	5389	5204
37	6161	5912	5730	5541	5423	5391	5202
37.1	6159	5951	5762	5569	5468	5380	5191
37.2	6095	5919	5729	5530	5465	5453	5149
37.3	6074	5917	5731	5601	5440	5498	5246
37.4	6138	6003	5691	5549	5469	5439	5248
37.5	6098	5942	5772	5550	5484	5379	5227
37.6	6144	5884	5800	5631	5491	5365	5221
37.7	6157	5938	5737	5609	5474	5450	5244
37.8	6094	5920	5765	5505	5464	5434	5192
37.9	6152	5953	5767	5594	5442	5382	5277
38	6046	5934	5729	5516	5397	5445	5202
38.1	6177	5916	5732	5477	5410	5391	5195
38.2	6105	5992	5751	5547	5445	5369	5214
38.3	6125	5949	5684	5575	5418	5361	5271
38.4	6154	5895	5762	5550	5427	5430	5161
38.5	6174	5871	5821	5587	5494	5472	5195
38.6	6146	5919	5833	5623	5377	5401	5224
38.7	6080	5885	5805	5622	5446	5442	5288
38.8	6193	5906	5699	5596	5383	5393	5262
38.9	6150	5901	5749	5607	5411	5388	5231
39	6143	5900	5762	5555	5403	5370	5178
39.1	6100	5871	5748	5580	5397	5414	5291
39.2	6104	5941	5751	5627	5502	5438	5117
39.3	6164	5929	5754	5568	5323	5402	5184
39.4	6162	5994	5761	5604	5477	5427	5223
39.5	6153	5958	5804	5637	5469	5404	5230
39.6	6233	5833	5783	5592	5439	5433	5152
39.7	6208	5862	5726	5523	5423	5461	5215
39.8	6135	5880	5764	5545	5448	5415	5246
39.9	6124	5872	5727	5565	5439	5433	5170
40	6159	5982	5825	5527	5397	5410	5204
40.1	6161	5949	5781	5560	5414	5498	5211
40.2	6118	5935	5733	5539	5376	5431	5169
40.3	6144	5845	5811	5556	5417	5474	5127
40.4	6166	5909	5724	5563	5378	5437	5210
40.5	6233	5912	5731	5521	5403	5449	5235
40.6	6150	5857	5774	5543	5403	5482	5138
40.7	6167	5961	5808	5532	5432	5401	5200
40.8	6233	5919	5739	5573	5424	5387	5196
40.9	6164	5917	5683	5604	5449	5438	5221
41	6244	5973	5753	5549	5465	5367	5210
41.1	6187	5954	5697	5569	5420	5449	5236
41.2	6142	5928	5699	5570	5448	5492	5210
41.3	6224	5913	5691	5541	5441	5378	5208
41.4	6158	6006	5702	5581	5442	5467	5180
41.5	6194	5954	5716	5557	5379	5459	5161
41.6	6162	5928	5856	5604	5380	5473	5108
41.7	6198	5932	5777	5599	5410	5436	5157
41.8	6171	5937	5729	5622	5379	5378	5132
41.9	6137	5919	5734	5550	5424	5395	5154
42	6194	5928	5720	5565	5445	5366	5122
42.1	6216	5977	5741	5596	5477	5449	5076
42.2	6144	5954	5747	5622	5344	5464	5171
42.3	6156	5898	5756	5640	5432	5411	5165
42.4	6080	5920	5794	5581	5437	5411	5163
42.5	6145	5959	5783	5579	5368	5446	5147
42.6	6096	5905	5800	5635	5453	5363	5107
42.7	6085	5919	5746	5633	5372	5362	5138
42.8	6177	5883	5775	5560	5436	5369	5137
42.9	6172	5868	5768	5605	5418	5338	5195
43	6079	5932	5754	5610	5491	5399	5156
43.1	6098	5994	5773	5576	5395	5421	5225
43.2	6113	5917	5757	5665	5447	5404	5224
43.3	6103	5908	5735	5595	5355	5426	5141
43.4	6080	5963	5741	5612	5359	5387	5117
43.5	6131	5898	5753	5571	5327	5446	5215
43.6	6080	5932	5696	5611	5442	5437	5125
43.7	6065	5975	5740	5642	5478	5397	5090
43.8	6096	5956	5719	5585	5420	5385	5168
43.9	6114	5880	5738	5597	5459	5412	5144
44	6078	5909	5713	5629	5432	5377	5117
44.1	6118	5998	5648	5590	5398	5406	5119
44.2	6114	5966	5751	5618	5478	5340	5090
44.3	6146	5945	5752	5627	5433	5398	5126
44.4	6171	5920	5680	5616	5426	5361	5191
44.5	6097	5906	5675	5642	5431	5392	5176
44.6	6091	5911	5689	5552	5429	5383	5158
44.7	6171	5970	5652	5627	5463	5419	5126
44.8	6067	5947	5711	5621	5440	5359	5183
44.9	6020	5878	5746	5582	5445	5516	5107
45	6153	5900	5717	5541	5498	5397	5153
45.1	6120	5930	5724	5566	5429	5348	5222
45.2	6062	5913	5811	5634	5461	5346	5214
45.3	6097	5906	5823	5627	5413	5336	5152
45.4	6090	5902	5794	5644	5456	5295	5154
45.5	6155	5911	5796	5553	5415	5323	5183
45.6	6118	5971	5704	5574	5407	5351	5186
45.7	6164	5953	5778	5552	5482	5379	5195
45.8	6144	5960	5772	5520	5425	5399	5216
45.9	6162	5934	5747	5530	5439	5323	5228
46	6108	5990	5803	5575	5505	5402	5164
46.1	6100	5932	5771	5630	5436	5406	5175
46.2	6109	5979	5716	5629	5469	5357	5224
46.3	6160	5932	5796	5573	5522	5381	5137
46.4	6099	6018	5823	5619	5439	5336	5153
46.5	6210	5957	5751	5576	5559	5326	5202
46.6	6052	5882	5816	5529	5457	5403	5141
46.7	6114	5929	5729	5610	5456	5331	5248
46.8	6064	5881	5735	5531	5502	5409	5107
46.9	6109	5930	5767	5545	5461	5423	5142
47	6071	5912	5744	5546	5550	5461	5194
47.1	6095	5963	5785	5550	5398	5460	5214
47.2	6094	5965	5771	5587	5423	5348	5132
47.3	6057	5961	5758	5499	5487	5405	5208
47.4	6077	5864	5767	5602	5518	5399	5187
47.5	6069	5911	5785	5567	5501	5447	5115
47.6	6089	5915	5755	5636	5517	5453	5147
47.7	6085	5951	5768	5570	5484	5451	5176
47.8	6063	5962	5782	5532	5513	5414	5260
47.9	6064	5891	5777	5577	5507	5362	5241
48	6068	5915	5715	5654	5545	5411	5241
48.1	6072	5890	5764	5628	5549	5381	5153
48.2	6058	5909	5776	5627	5500	5482	5247
48.3	6083	5892	5780	5628	5473	5438	5238
48.4	6030	5987	5772	5589	5457	5365	5149
48.5	6126	5945	5787	5565	5501	5404	5132
48.6	6096	5912	5751	5677	5453	5338	5155
48.7	6146	5940	5798	5621	5451	5451	5154
48.8	6106	5896	5736	5583	5425	5436	5210
48.9	6124	5970	5794	5661	5513	5378	5182
49	6092	5957	5716	5578	5442	5420	5163
49.1	6107	5878	5778	5638	5424	5437	5227
49.2	6063	5921	5768	5584	5389	5386	5232
49.3	6115	5912	5710	5564	5455	5343	5142
49.4	6080	5997	5777	5627	5478	5396	5138
49.5	6112	5966	5798	5616	5439	5470	5132
49.6	6140	5919	5777	5642	5491	5429	5099
49.7	6141	5856	5801	5603	5474	5358	5154
49.8	6112	5907	5770	5577	5405	5414	5109
49.9	6111	5919	5766	5627	5425	5385	5181
50	6096	5837	5726	5561	5504	5343	5148
50.1	6148	5896	5812	5654	5440	5357	5223
50.2	6125	5910	5790	5616	5337	5379	5105
50.3	6053	5983	5757	5602	5409	5503	5135
50.4	6126	5945	5762	5566	5435	5404	5201
50.5	6141	5901	5752	5599	5515	5436	5209
50.6	6156	5907	5733	5682	5445	5408	5118
50.7	6103	5936	5690	5628	5447	5396	5116
50.8	6098	5896	5732	5652	5462	5388	5103
50.9	6095	5916	5746	5573	5427	5418	5209
51	6144	5860	5726	5627	5385	5454	5151
51.1	6062	5890	5717	5583	5417	5417	5210
51.2	6109	5890	5715	5548	5465	5381	5121
51.3	6094	5936	5699	5579	5506	5394	5074
51.4	6161	5876	5719	5607	5428	5394	5104
51.5	6131	5927	5723	5557	5484	5431	5067
51.6	6123	5939	5753	5581	5505	5432	5045
51.7	6091	5875	5688	5584	5489	5443	5138
51.8	6122	5941	5711	5521	5441	5492	5153
51.9	6113	5933	5745	5594	5364	5436	5162
52	6103	5844	5721	5577	5448	5402	5079
52.1	6087	5904	5743	5629	5474	5413	5122
52.2	6087	5953	5734	5591	5514	5516	5113
52.3	6193	5916	5726	5565	5474	5472	5065
52.4	6172	5912	5777	5583	5464	5446	5165
52.5	6160	5912	5779	5623	5439	5440	5149
52.6	6085	5956	5760	5577	5456	5405	5151
52.7	6160	5909	5669	5620	5468	5382	5133
52.8	6103	5906	5698	5650	5484	5355	5186
52.9	6136	5921	5710	5643	5372	5397	5166
53	6124	5901	5741	5607	5454	5366	5019
53.1	6121	5850	5760	5612	5581	5312	5140
53.2	6107	5958	5686	5661	5543	5405	5068
53.3	6129	5966	5706	5621	5501	5335	5079
53.4	6102	5940	5692	5609	5515	5386	5074
53.5	6096	5941	5710	5592	5474	5404	5040
53.6	6143	5959	5728	5628	5381	5428	5051
53.7	6150	5897	5754	5574	5434	5474	5117
53.8	6124	5909	5674	5614	5435	5432	5166
53.9	6150	5957	5686	5543	5396	5382	5097
54	6128	5930	5701	5611	5454	5325	5039
54.1	6060	5898	5715	5559	5583	5385	5047
54.2	6117	5934	5687	5606	5526	5364	5114
54.3	6128	5977	5681	5616	5425	5321	5188
54.4	6182	5920	5654	5627	5544	5448	5148
54.5	6100	5945	5696	5551	5493	5417	5105
54.6	6050	5929	5714	5566	5508	5375	5116
54.7	6090	5938	5701	5546	5501	5368	5107
54.8	6087	5952	5796	5554	5478	5364	5136
54.9	6091	5962	5675	5668	5426	5338	5138
55	6105	5923	5727	5626	5441	5295	5139
55.1	6144	5918	5697	5591	5466	5395	5152
55.2	6133	5919	5756	5603	5458	5283	5131
55.3	6113	5937	5774	5621	5417	5300	5228
55.4	6047	5947	5760	5574	5484	5363	5155
55.5	6020	5939	5771	5637	5530	5385	5076
55.6	6084	5890	5803	5628	5458	5404	5075
55.7	6101	5947	5702	5547	5537	5449	5146
55.8	6145	5947	5738	5626	5468	5419	5048
55.9	6064	5916	5783	5616	5510	5397	5062
56	6127	5941	5715	5597	5454	5417	5167
56.1	6119	5843	5803	5560	5554	5417	5118
56.2	6080	5920	5705	5627	5425	5431	5091
56.3	6138	5968	5733	5562	5473	5440	5150
56.4	6075	5931	5738	5581	5526	5487	5169
56.5	6091	5937	5754	5631	5410	5460	5157
56.6	6131	5956	5727	5604	5446	5414	5134
56.7	6140	5919	5765	5572	5508	5462	5151
56.8	6072	5934	5753	5616	5476	5405	5132
56.9	6103	6044	5724	5705	5408	5450	5175
57	6100	5955	5743	5626	5507	5298	5134
57.1	6100	5913	5668	5584	5515	5340	5130
57.2	6125	5959	5764	5647	5494	5445	5097
57.3	6110	5959	5700	5661	5444	5355	5090
57.4	6150	5901	5765	5618	5480	5408	5136
57.5	6094	5972	5698	5602	5522	5425	5142
57.6	6165	5915	5780	5570	5497	5436	5118
57.7	6103	5957	5709	5532	5487	5484	5148
57.8	6115	5880	5701	5614	5452	5380	5100
57.9	6117	5895	5763	5615	5506	5416	5050
58	6133	5894	5706	5612	5434	5432	5100
58.1	6138	5865	5720	5602	5463	5478	5140
58.2	6105	5938	5762	5625	5451	5392	5115
58.3	6119	5952	5702	5542	5451	5511	5135
58.4	6112	5940	5720	5584	5474	5467	5160
58.5	5980	5939	5717	5648	5504	5436	5112
58.6	6064	5962	5771	5588	5562	5464	5023
58.7	6080	5932	5817	5664	5404	5438	5102
58.8	6099	5968	5767	5582	5375	5448	5135
58.9	6074	5932	5719	5547	5434	5404	5090
59	6088	5908	5763	5565	5453	5427	5107
59.1	6052	5922	5740	5637	5407	5445	5119
59.2	6111	5933	5758	5590	5466	5428	5063
59.3	6075	5889	5779	5550	5424	5396	5124
59.4	6128	5981	5798	5563	5437	5412	5044
59.5	6101	5922	5730	5568	5415	5386	5086
59.6	6081	5965	5788	5562	5433	5462	5077
59.7	6076	6043	5817	5521	5409	5404	5064
59.8	6095	5971	5857	5540	5437	5414	5085
59.9	6138	6040	5780	5552	5405	5354	5059
60	6073	5964	5770	5548	5449	5337	5047
60.1	6106	6001	5814	5568	5392	5393	5065
60.2	6085	5932	5782	5542	5418	5449	5161
60.3	6027	5941	5770	5462	5445	5377	5117
60.4	6059	5940	5794	5638	5392	5369	5116
60.5	6110	5964	5735	5598	5422	5419	5197
60.6	6109	5947	5728	5606	5493	5410	5221
60.7	6083	5943	5806	5531	5420	5331	5166
60.8	6095	5926	5767	5560	5522	5326	5105
60.9	6089	5901	5775	5615	5488	5328	5116
61	6092	5935	5762	5594	5446	5395	5145
61.1	6071	5978	5836	5635	5477	5386	5149
61.2	6063	5983	5788	5600	5458	5361	5236
61.3	6093	5964	5768	5559	5425	5328	5118
61.4	6090	5970	5771	5606	5464	5349	5078
61.5	6101	5872	5707	5570	5430	5332	5166
61.6	6124	5959	5720	5577	5452	5330	5150
61.7	6143	5944	5712	5632	5527	5374	5162
61.8	6051	5897	5780	5606	5511	5354	5087
61.9	6113	5842	5710	5623	5425	5338	5152
62	6083	5935	5678	5581	5505	5390	5125
62.1	6060	5897	5730	5621	5471	5368	5170
62.2	6077	5892	5789	5634	5434	5437	5079
62.3	6099	5932	5751	5581	5477	5357	5146
62.4	6055	5965	5687	5657	5450	5312	5057
62.5	6093	5929	5727	5601	5443	5297	5072
62.6	6081	5926	5736	5619	5508	5332	5109
62.7	6083	5897	5760	5635	5473	5355	5070
62.8	6093	5899	5724	5611	5478	5397	5152
62.9	6098	5925	5697	5597	5517	5265	5022
63	6111	5957	5731	5604	5541	5319	5116
63.1	6098	5908	5769	5583	5489	5364	5114
63.2	6083	5916	5730	5600	5562	5345	5159
63.3	6041	5962	5742	5622	5435	5337	5099
63.4	6108	5945	5732	5588	5414	5413	5107
63.5	6033	5889	5751	5659	5469	5325	5129
63.6	6048	5891	5760	5527	5472	5321	5054
63.7	6143	5943	5744	5633	5431	5354	5104
63.8	6066	5944	5799	5610	5467	5295	5100
63.9	6102	6029	5735	5610	5437	5363	5115
64	6118	5963	5760	5596	5464	5362	5129
64.1	6112	5948	5762	5633	5435	5365	5091
64.2	6103	5982	5802	5592	5403	5405	5083
64.3	6095	5922	5784	5558	5421	5359	5103
64.4	6032	5882	5771	5612	5417	5330	5078
64.5	6086	5920	5743	5580	5440	5394	5051
64.6	6156	5902	5776	5600	5449	5347	5159
64.7	6074	5856	5773	5625	5374	5373	5050
64.8	6155	5908	5691	5650	5421	5399	5104
64.9	6113	5974	5774	5571	5464	5361	5125
65	6106	5910	5800	5585	5407	5321	5103
65.1	6106	5929	5738	5521	5442	5389	5054
65.2	6120	6011	5740	5508	5375	5381	5037
65.3	6075	5921	5752	5495	5400	5317	5071
65.4	6090	5945	5741	5505	5498	5378	5106
65.5	6060	5911	5805	5589	5469	5338	5058
65.6	6056	5936	5789	5569	5422	5403	5136
65.7	6075	5902	5741	5624	5493	5425	5243
65.8	6046	5958	5732	5664	5422	5375	5221
65.9	6035	5900	5820	5597	5375	5359	5113
66	6064	5914	5795	5607	5423	5323	5105
66.1	6084	5920	5734	5602	5388	5325	5193
66.2	6081	5955	5795	5603	5426	5426	5131
66.3	6028	5900	5705	5628	5455	5362	5087
66.4	6071	5925	5767	5624	5374	5330	5117
66.5	6054	5898	5749	5561	5424	5313	5052
66.6	6068	5981	5760	5638	5432	5314	5089
66.7	6105	5962	5779	5611	5391	5343	5190
66.8	6075	5980	5772	5620	5436	5372	5232
66.9	6081	5959	5800	5600	5352	5313	5163
67	6093	5962	5799	5605	5433	5322	5117
67.1	6010	5964	5794	5603	5403	5279	5140
67.2	6107	5971	5786	5679	5385	5268	5133
67.3	5975	5925	5833	5613	5470	5340	5083
67.4	6005	5991	5815	5574	5444	5346	5070
67.5	6038	5943	5764	5640	5437	5318	5063
67.6	6082	5943	5780	5665	5446	5303	5183
67.7	6082	5836	5755	5548	5408	5315	5093
67.8	6066	5903	5836	5602	5434	5302	5121
67.9	6036	5928	5863	5584	5381	5300	5140
68	6106	5925	5815	5598	5476	5391	5125
68.1	6084	5936	5839	5540	5430	5359	5044
68.2	6061	5973	5843	5627	5368	5441	5120
68.3	6090	5946	5769	5676	5450	5331	5082
68.4	6106	5922	5777	5575	5422	5426	5145
68.5	6066	5932	5818	5516	5462	5410	5085
68.6	6030	5833	5782	5603	5411	5340	5032
68.7	6082	5933	5791	5583	5433	5338	5034
68.8	6066	5875	5755	5557	5453	5372	5105
68.9	6048	5898	5796	5605	5440	5404	5000
69	6092	5907	5768	5539	5430	5286	5127
69.1	6102	5931	5847	5619	5397	5359	5138
69.2	6058	6004	5795	5496	5454	5336	5132
69.3	6123	5930	5830	5539	5442	5347	5161
69.4	6038	5979	5797	5554	5441	5361	5133
69.5	6113	5942	5726	5470	5412	5349	5082
69.6	6081	5953	5828	5616	5391	5370	5127
69.7	6100	5914	5816	5571	5457	5319	5057
69.8	6088	5934	5785	5584	5426	5363	5100
69.9	6028	6035	5814	5564	5410	5297	5099
70	6088	5957	5777	5549	5379	5461	5012
70.1	6078	5994	5722	5615	5416	5390	5087
70.2	6103	5964	5795	5603	5390	5392	5149
70.3	6039	5915	5793	5600	5386	5356	5077
70.4	6120	5983	5746	5588	5466	5351	5123
70.5	6082	5900	5735	5534	5421	5260	5115
70.6	6075	5905	5724	5584	5459	5369	5048
70.7	6115	5957	5790	5553	5411	5336	5155
70.8	6078	5948	5783	5509	5460	5278	5112
70.9	6117	5944	5771	5630	5327	5322	5095
71	6081	5971	5763	5550	5362	5299	5122
71.1	6103	5935	5749	5555	5403	5327	5025
71.2	6076	5911	5777	5610	5403	5304	5038
71.3	6082	5942	5748	5584	5407	5314	5115
71.4	6047	5943	5761	5562	5424	5340	5154
71.5	6115	5912	5786	5585	5365	5359	5115
71.6	6092	5966	5770	5554	5310	5299	5137
71.7	6042	5999	5768	5558	5371	5301	5078
71.8	6084	5925	5756	5552	5416	5280	5084
71.9	6137	5985	5781	5519	5412	5405	5114
72	6138	5939	5669	5583	5429	5336	5078
72.1	6082	5927	5740	5554	5390	5358	5027
72.2	6081	5883	5812	5566	5412	5320	5094
72.3	6140	5876	5777	5634	5426	5297	5110
72.4	6147	5932	5801	5575	5368	5278	5047
72.5	6109	6007	5773	5615	5385	5267	5111
72.6	6101	5914	5802	5623	5402	5326	5110
72.7	6048	5963	5859	5553	5412	5272	5093
72.8	6065	5967	5883	5609	5433	5331	5128
72.9	6133	5982	5865	5612	5363	5365	5105
73	6096	5989	5829	5638	5401	5351	5183
73.1	6117	5984	5799	5581	5420	5366	5118
73.2	6111	5956	5810	5528	5403	5288	5139
73.3	6127	5941	5763	5560	5455	5276	5137
73.4	6078	5998	5757	5590	5435	5277	5132
73.5	6162	5880	5802	5530	5428	5263	5031
73.6	6143	5935	5812	5593	5447	5317	5119
73.7	6112	5948	5821	5576	5468	5381	5095
73.8	6045	5937	5844	5556	5455	5378	5090
73.9	6072	5946	5786	5528	5478	5317	5117
74	6112	5995	5777	5588	5501	5360	5066
74.1	6085	5965	5784	5561	5432	5309	5046
74.2	6147	5958	5773	5593	5482	5289	5080
74.3	6136	5953	5754	5561	5394	5313	5146
74.4	6128	5942	5837	5517	5405	5303	5089
74.5	6118	5928	5805	5523	5450	5359	5067
74.6	6131	5909	5812	5477	5426	5291	5079
74.7	6096	5888	5795	5519	5427	5356	4996
74.8	6057	5955	5840	5454	5391	5301	5006
74.9	6176	5979	5843	5568	5417	5307	5029
75	6090	5916	5849	5564	5436	5307	5054
75.1	6155	5903	5825	5582	5402	5350	5176
75.2	6156	5918	5831	5590	5378	5319	5129
75.3	6075	5891	5777	5624	5362	5312	5064
75.4	6088	5947	5837	5547	5420	5334	5066
75.5	6110	5897	5842	5641	5394	5314	5095
75.6	6173	5876	5839	5622	5437	5308	5136
75.7	6193	5863	5749	5654	5396	5280	5098
75.8	6126	5956	5871	5574	5458	5310	5045
75.9	6081	5950	5788	5541	5437	5297	5109
76	6151	5892	5817	5545	5405	5280	5067
76.1	6156	5935	5810	5558	5422	5283	5048
76.2	6130	5886	5799	5522	5350	5281	5082
76.3	6136	5882	5789	5588	5463	5264	5085
76.4	6119	5926	5814	5549	5356	5323	5049
76.5	6118	5900	5757	5514	5369	5238	5060
76.6	6115	5874	5805	5480	5429	5247	5070
76.7	6112	5913	5785	5507	5459	5296	5014
76.8	6130	5936	5860	5547	5418	5251	5086
76.9	6115	5914	5813	5552	5408	5285	5100
77	6093	5902	5743	5530	5424	5258	5035
77.1	6074	5877	5822	5526	5429	5359	5076
77.2	6089	5872	5794	5577	5451	5328	5127
77.3	6081	5864	5759	5524	5444	5317	5104
77.4	6092	5851	5776	5571	5437	5336	5098
77.5	6082	5930	5741	5493	5420	5316	5187
77.6	6183	5899	5776	5599	5430	5323	5084
77.7	6087	5826	5727	5486	5402	5388	5031
77.8	6137	5894	5769	5556	5405	5378	5037
77.9	6106	5852	5818	5472	5326	5395	5113
78	6085	5930	5794	5542	5349	5346	5042
78.1	6169	5911	5804	5508	5400	5368	5166
78.2	6194	5893	5755	5485	5365	5351	5129
78.3	6118	5864	5760	5562	5398	5243	5074
78.4	6154	5945	5740	5567	5329	5296	5016
78.5	6089	5868	5838	5558	5369	5362	5059
78.6	6155	5910	5769	5611	5427	5352	5064
78.7	6098	5920	5829	5586	5474	5366	5037
78.8	6158	5826	5771	5555	5408	5355	5052
78.9	6148	5942	5820	5527	5393	5314	5107
79	6100	5854	5766	5551	5413	5268	5098
79.1	6118	5875	5777	5585	5422	5209	4988
79.2	6136	5926	5811	5537	5413	5304	5059
79.3	6120	5893	5782	5613	5356	5347	5041
79.4	6110	5938	5781	5539	5414	5268	5148
79.5	6078	5878	5773	5565	5353	5297	4997
79.6	6061	5887	5789	5533	5412	5282	5092
79.7	6068	5869	5708	5561	5413	5323	5130
79.8	6135	5888	5727	5576	5398	5287	5045
79.9	6132	5902	5719	5531	5445	5258	5120
80	6072	5939	5751	5524	5428	5267	5077
80.1	6167	5962	5692	5501	5462	5302	5057
80.2	6127	5921	5757	5536	5390	5307	5049
80.3	6146	5899	5745	5539	5425	5328	5065
80.4	6118	5941	5770	5575	5380	5320	5038
80.5	6134	5908	5743	5571	5408	5377	5126
80.6	6124	5945	5703	5551	5397	5329	5149
80.7	6153	5902	5784	5580	5487	5322	5136
80.8	6122	5861	5752	5614	5367	5292	5057
80.9	6099	5905	5817	5641	5353	5300	5135
81	6146	5931	5771	5587	5421	5315	5162
81.1	6138	5877	5799	5517	5392	5319	5129
81.2	6099	5879	5787	5540	5367	5284	5088
81.3	6109	5899	5706	5473	5378	5327	5142
81.4	6149	5920	5711	5579	5392	5312	5127
81.5	6171	5869	5749	5475	5394	5270	4961
81.6	6128	5896	5697	5532	5316	5323	5114
81.7	6099	5928	5721	5559	5488	5313	5122
81.8	6157	5941	5769	5521	5361	5342	5059
81.9	6078	5902	5740	5569	5383	5345	4994
82	6177	5952	5680	5577	5478	5346	5066
82.1	6121	5886	5711	5560	5403	5303	5102
82.2	6089	5965	5716	5582	5392	5283	5104
82.3	6088	5937	5675	5550	5480	5259	5107
82.4	6195	5938	5795	5504	5414	5269	5065
82.5	6106	5864	5778	5546	5395	5244	5047
82.6	6176	5886	5693	5560	5400	5310	5109
82.7	6113	5874	5719	5490	5373	5401	5195
82.8	6155	5894	5750	5578	5359	5352	5098
82.9	6102	5956	5676	5588	5312	5304	5141
83	6130	5911	5746	5563	5390	5264	5062
83.1	6107	5900	5764	5554	5417	5244	5031
83.2	6080	5890	5740	5562	5383	5319	5148
83.3	6062	5889	5772	5543	5384	5301	5151
83.4	6129	5874	5785	5557	5398	5275	5134
83.5	6099	5844	5720	5583	5367	5304	5099
83.6	6141	5857	5669	5571	5379	5295	5068
83.7	6127	5847	5723	5493	5357	5323	5060
83.8	6153	5942	5720	5578	5355	5264	5083
83.9	6125	5856	5695	5571	5410	5354	5081
84	6094	5883	5768	5516	5416	5413	5092
84.1	6079	5923	5759	5536	5319	5333	5122
84.2	6095	5943	5732	5552	5337	5372	5121
84.3	6187	5913	5808	5566	5314	5299	5083
84.4	6165	5919	5711	5600	5332	5328	5053
84.5	6039	5916	5738	5617	5409	5307	5137
84.6	6139	5841	5768	5609	5377	5291	5129
84.7	6085	5907	5781	5549	5297	5299	5098
84.8	6106	5896	5723	5569	5390	5283	5141
84.9	6193	5903	5741	5547	5292	5333	5033
85	6081	5921	5784	5566	5336	5355	5045
85.1	6119	5908	5694	5566	5326	5269	5091
85.2	6129	5860	5745	5559	5398	5416	5098
85.3	6093	5900	5717	5561	5397	5336	5083
85.4	6143	5930	5748	5605	5427	5462	5106
85.5	6117	5968	5646	5560	5318	5281	5089
85.6	6161	5932	5751	5563	5319	5370	5109
85.7	6092	5887	5750	5560	5343	5329	5116
85.8	6196	5952	5707	5522	5327	5370	5051
85.9	6152	5883	5726	5537	5370	5312	5125
86	6142	5898	5679	5489	5356	5316	5120
86.1	6165	5910	5711	5520	5319	5351	5004
86.2	6168	5884	5708	5611	5353	5311	5153
86.3	6129	5895	5714	5533	5354	5316	5136
86.4	6143	5912	5732	5648	5391	5410	5153
86.5	6205	5936	5627	5549	5384	5327	5142
86.6	6128	5966	5789	5510	5332	5350	5091
86.7	6154	5916	5768	5571	5439	5321	5137
86.8	6162	5923	5715	5590	5438	5270	5160
86.9	6140	5918	5756	5627	5465	5326	5115
87	6209	5865	5686	5653	5330	5322	5065
87.1	6173	5918	5760	5608	5339	5311	5167
87.2	6171	5877	5688	5585	5362	5344	5130
87.3	6127	5870	5703	5576	5379	5311	5099
87.4	6125	5917	5714	5595	5388	5369	5048
87.5	6124	5921	5742	5577	5342	5297	5142
87.6	6108	5914	5742	5598	5345	5292	5114
87.7	6151	5940	5707	5539	5366	5258	5082
87.8	6225	5882	5763	5538	5347	5309	5088
87.9	6190	5967	5723	5569	5347	5280	5084
88	6158	5899	5741	5582	5399	5303	5126
88.1	6165	5872	5717	5573	5388	5251	5140
88.2	6176	5949	5765	5646	5340	5323	5030
88.3	6168	5922	5715	5543	5411	5346	5138
88.4	6165	5900	5780	5570	5443	5344	5089
88.5	6146	5978	5749	5588	5387	5362	5156
88.6	6176	5887	5684	5593	5363	5401	5090
88.7	6150	5943	5745	5540	5334	5374	5063
88.8	6138	5916	5796	5581	5386	5354	5105
88.9	6151	5942	5693	5590	5319	5396	5129
89	6160	5859	5700	5593	5318	5326	5107
89.1	6134	5962	5787	5555	5341	5327	5088
89.2	6121	5925	5690	5576	5313	5307	5049
89.3	6103	5963	5738	5611	5366	5329	5174
89.4	6145	5957	5700	5583	5336	5358	5054
89.5	6136	5840	5711	5611	5362	5370	5087
89.6	6178	5875	5719	5476	5355	5406	5050
89.7	6106	5895	5776	5557	5312	5366	5130
89.8	6105	5869	5746	5538	5360	5302	5171
89.9	6100	5882	5743	5536	5442	5396	5122
90	6181	5921	5718	5550	5383	5374	5072
90.1	6187	5916	5781	5579	5331	5351	5134
90.2	6205	5858	5703	5520	5457	5382	5051
90.3	6186	5876	5695	5493	5404	5369	5040
90.4	6180	5868	5740	5526	5412	5364	5159
90.5	6149	5903	5740	5555	5414	5464	5078
90.6	6161	5902	5756	5564	5383	5383	5047
90.7	6186	5903	5745	5620	5379	5397	5152
90.8	6184	5932	5741	5540	5368	5341	5125
90.9	6186	5899	5715	5599	5334	5382	5149
91	6174	5907	5727	5578	5309	5334	5087
91.1	6133	5962	5784	5563	5359	5328	5039
91.2	6169	5902	5736	5552	5371	5321	5034
91.3	6169	5893	5708	5518	5442	5363	5021
91.4	6201	5877	5723	5532	5389	5339	5046
91.5	6155	6023	5718	5575	5369	5331	5077
91.6	6144	5917	5636	5614	5360	5349	5079
91.7	6113	5912	5738	5604	5385	5311	5025
91.8	6097	5949	5667	5619	5369	5299	5119
91.9	6164	5921	5744	5565	5310	5299	5090
92	6063	5966	5641	5533	5375	5343	5117
92.1	6144	5954	5727	5518	5317	5245	5076
92.2	6143	5953	5705	5505	5301	5281	5049
92.3	6157	6023	5696	5587	5473	5312	5085
92.4	6171	5933	5655	5596	5418	5304	5096
92.5	6151	5926	5698	5584	5408	5359	5172
92.6	6133	5969	5693	5598	5368	5391	5145
92.7	6137	6005	5756	5574	5363	5250	5090
92.8	6122	5954	5747	5636	5326	5348	5123
92.9	6175	5927	5692	5591	5348	5375	5102
93	6107	5930	5742	5606	5338	5394	5130
93.1	6137	5984	5680	5560	5428	5378	5064
93.2	6161	5940	5690	5623	5413	5409	5072
93.3	6083	5962	5701	5584	5457	5326	5030
93.4	6129	5889	5726	5548	5384	5388	5060
93.5	6100	5890	5763	5544	5418	5360	5026
93.6	6126	5953	5691	5570	5406	5341	5038
93.7	6107	5928	5771	5579	5465	5309	5064
93.8	6153	5971	5764	5573	5384	5347	5098
93.9	6193	5906	5751	5581	5374	5219	5078
94	6164	5963	5747	5643	5398	5353	5135
94.1	6151	5922	5741	5565	5442	5309	5111
94.2	6163	5879	5763	5552	5403	5305	5056
94.3	6161	5910	5738	5573	5424	5332	5027
94.4	6140	5948	5751	5621	5378	5372	4961
94.5	6169	5904	5735	5567	5347	5346	5088
94.6	6196	5884	5774	5550	5383	5353	5069
94.7	6097	5957	5733	5528	5338	5399	5047
94.8	6147	5993	5705	5604	5416	5250	5058
94.9	6147	5932	5761	5558	5471	5282	5030
95	6149	5936	5708	5535	5484	5252	4983
95.1	6159	5909	5746	5524	5422	5279	5026
95.2	6084	5943	5730	5613	5546	5292	5093
95.3	6101	5967	5785	5568	5432	5266	5075
95.4	6118	5945	5777	5546	5448	5233	5075
95.5	6122	5902	5752	5515	5432	5286	5087
95.6	6103	5943	5704	5531	5492	5225	5118
95.7	6139	5981	5792	5545	5444	5278	5067
95.8	6116	5862	5765	5570	5423	5249	5038
95.9	6131	5948	5777	5577	5487	5378	5108
96	6162	6013	5781	5523	5442	5307	5146
96.1	6055	5933	5770	5542	5432	5349	5124
96.2	6120	5910	5744	5611	5420	5339	5079
96.3	6052	5938	5704	5459	5400	5344	5057
96.4	6115	5913	5782	5614	5386	5276	5029
96.5	6187	5873	5768	5622	5418	5299	5020
96.6	6156	5927	5730	5631	5459	5372	5093
96.7	6114	5946	5717	5574	5355	5327	5019
96.8	6200	5896	5781	5616	5365	5377	5094
96.9	6134	5901	5687	5562	5463	5454	5102
97	6074	5946	5756	5482	5418	5305	5064
97.1	6078	5905	5678	5586	5471	5281	5087
97.2	6179	5916	5691	5506	5406	5320	5091
97.3	6151	5942	5721	5595	5398	5286	5012
97.4	6212	5944	5713	5556	5425	5324	5055
97.5	6182	5982	5791	5615	5406	5360	5089
97.6	6112	5966	5732	5474	5412	5340	5097
97.7	6153	5930	5764	5567	5396	5401	5060
97.8	6111	5933	5744	5539	5402	5299	5093
97.9	6080	5866	5750	5601	5416	5386	5103
98	6136	5959	5706	5551	5357	5325	5091
98.1	6148	5920	5663	5569	5379	5299	5042
98.2	6118	5907	5747	5582	5409	5351	5007
98.3	6125	5972	5796	5585	5422	5386	5086
98.4	6184	5931	5775	5605	5379	5353	5096
98.5	6116	5956	5702	5568	5358	5258	5059
98.6	6112	5904	5686	5571	5444	5340	5105
98.7	6139	5881	5716	5565	5412	5344	5113
98.8	6208	5892	5700	5539	5460	5367	5078
98.9	6162	5908	5708	5497	5320	5323	5049
99	6183	5889	5732	5501	5405	5293	5037
99.1	6218	5920	5729	5548	5396	5332	5050
99.2	6168	5936	5734	5603	5385	5303	5171
99.3	6144	5927	5754	5522	5355	5345	5049
99.4	6179	5831	5675	5557	5370	5389	5040
99.5	6163	5890	5763	5533	5342	5225	5127
99.6	6106	5967	5709	5486	5371	5238	5098
99.7	6175	5890	5826	5429	5458	5345	5056
99.8	6139	5908	5760	5459	5413	5330	5142
99.9	6168	5917	5797	5529	5444	5302	5074
100	6182	5876	5724	5552	5385	5368	5017
100.1	6191	5963	5712	5519	5461	5346	5088
100.2	6133	5975	5746	5533	5404	5326	5023
100.3	6175	5923	5691	5501	5400	5374	5062
100.4	6145	5922	5722	5480	5393	5307	5044
100.5	6189	5919	5726	5520	5399	5322	5033
100.6	6195	5980	5751	5521	5429	5269	5028
100.7	6235	5968	5789	5541	5429	5372	5016
100.8	6237	5927	5829	5543	5405	5287	5058
100.9	6250	5934	5766	5493	5480	5338	5124
101	6184	5913	5749	5593	5444	5309	5115
101.1	6187	5949	5746	5492	5387	5425	4999
101.2	6244	5880	5700	5556	5380	5309	5119
101.3	6172	5934	5793	5496	5452	5259	5083
101.4	6182	5897	5785	5534	5414	5408	5094
101.5	6174	5909	5810	5519	5474	5273	5096
101.6	6142	5943	5750	5548	5388	5321	5199
101.7	6196	5977	5805	5564	5379	5321	5024
101.8	6141	5985	5796	5554	5379	5333	5036
101.9	6238	6016	5790	5562	5498	5384	5110
102	6167	5990	5778	5489	5433	5350	5066
102.1	6183	5928	5669	5564	5323	5310	5062
102.2	6223	6014	5802	5555	5403	5297	5035
102.3	6193	6041	5819	5641	5362	5302	5095
102.4	6174	5952	5787	5524	5383	5382	5031
102.5	6185	5933	5784	5574	5405	5313	5042
102.6	6157	5926	5784	5496	5397	5341	5059
102.7	6208	5956	5772	5570	5390	5312	5026
102.8	6182	5943	5778	5575	5364	5367	5070
102.9	6190	5935	5741	5516	5395	5297	5122
103	6130	5968	5748	5545	5396	5351	5055
103.1	6182	5955	5841	5547	5347	5381	5062
103.2	6160	5904	5729	5500	5403	5383	5048
103.3	6112	5966	5717	5546	5415	5336	5026
103.4	6146	6056	5728	5534	5452	5346	5055
103.5	6168	6005	5726	5553	5413	5391	5136
103.6	6204	5962	5779	5529	5341	5359	5081
103.7	6148	5977	5730	5510	5385	5330	5138
103.8	6222	6003	5775	5572	5386	5361	5042
103.9	6194	5963	5784	5544	5415	5351	5042
104	6166	5956	5782	5482	5434	5346	5095
104.1	6175	6007	5742	5521	5433	5346	5073
104.2	6138	5966	5747	5535	5454	5307	5056
104.3	6243	5920	5770	5595	5375	5329	5007
104.4	6166	5833	5735	5531	5363	5363	5093
104.5	6172	5857	5715	5601	5408	5287	4987
104.6	6171	5971	5732	5593	5388	5350	5066
104.7	6128	5897	5767	5558	5410	5325	5038
104.8	6166	5873	5742	5547	5385	5269	5080
104.9	6184	5902	5840	5649	5386	5324	4966
105	6108	5904	5746	5547	5434	5316	5055
105.1	6162	5899	5742	5521	5405	5290	5015
105.2	6165	5939	5763	5480	5355	5374	5059
105.3	6146	5890	5785	5535	5318	5309	5138
105.4	6122	5842	5758	5544	5337	5281	5023
105.5	6159	5879	5744	5473	5424	5345	5090
105.6	6119	5883	5765	5499	5316	5309	5061
105.7	6108	5885	5777	5519	5381	5309	5117
105.8	6168	5959	5791	5513	5369	5289	5021
105.9	6206	5882	5718	5566	5404	5367	5120
106	6164	5903	5796	5533	5389	5291	5101
106.1	6198	5888	5806	5504	5402	5407	5115
106.2	6124	5884	5786	5509	5518	5418	5075
106.3	6199	5902	5845	5519	5394	5364	5130
106.4	6201	5980	5807	5555	5448	5376	5075
106.5	6211	5916	5764	5600	5325	5365	5073
106.6	6124	5885	5759	5518	5454	5413	4992
106.7	6107	5949	5812	5528	5408	5395	5006
106.8	6174	5966	5785	5544	5378	5373	5124
106.9	6197	5948	5785	5556	5454	5371	5081
107	6221	5936	5791	5581	5378	5427	5123
107.1	6211	5894	5780	5531	5418	5336	5073
107.2	6194	5941	5781	5507	5365	5360	5039
107.3	6106	5898	5766	5474	5371	5318	5077
107.4	6153	5975	5807	5492	5416	5362	5134
107.5	6128	6018	5772	5531	5414	5371	5050
107.6	6193	5942	5762	5519	5481	5398	5086
107.7	6186	5964	5730	5499	5394	5392	5083
107.8	6159	5928	5750	5585	5395	5305	5024
107.9	6162	5959	5753	5517	5307	5367	5063
108	6144	5934	5773	5525	5359	5370	5102
108.1	6141	5920	5755	5545	5343	5412	5049
108.2	6192	5996	5749	5544	5411	5400	5031
108.3	6212	6021	5753	5557	5386	5295	5060
108.4	6160	5982	5753	5548	5389	5338	5089
108.5	6128	5940	5707	5547	5400	5319	5218
108.6	6177	5914	5712	5522	5386	5290	5136
108.7	6175	5982	5751	5477	5358	5283	5052
108.8	6161	5968	5753	5494	5370	5306	5091
108.9	6147	5993	5735	5507	5377	5342	5126
109	6145	6013	5784	5496	5365	5324	5098
109.1	6146	6010	5827	5508	5359	5339	5082
109.2	6167	5982	5832	5508	5345	5293	5032
109.3	6140	5976	5755	5533	5422	5332	5089
109.4	6199	5988	5759	5526	5327	5303	5014
109.5	6170	6041	5827	5536	5386	5310	5117
109.6	6106	6024	5732	5512	5427	5325	5105
109.7	6170	5975	5798	5457	5330	5375	5025
109.8	6173	5977	5812	5481	5439	5297	5059
109.9	6128	5953	5723	5569	5408	5319	5019
110	6150	5961	5793	5658	5331	5310	5098
110.1	6160	5986	5725	5576	5400	5314	5046
110.2	6149	6028	5774	5582	5322	5296	5094
110.3	6207	5971	5732	5624	5412	5378	4992
110.4	6189	5919	5677	5494	5344	5354	4999
110.5	6156	5971	5741	5522	5332	5385	4980
110.6	6101	5949	5827	5531	5361	5314	5018
110.7	6168	5949	5765	5491	5334	5317	5028
110.8	6103	5994	5747	5522	5398	5232	5045
110.9	6227	5986	5754	5510	5325	5393	4977
111	6220	5979	5759	5590	5361	5366	4963
111.1	6178	5947	5772	5551	5376	5320	4950
111.2	6218	6009	5776	5513	5364	5382	4992
111.3	6182	6036	5740	5523	5467	5390	5017
111.4	6151	5996	5731	5555	5388	5365	5057
111.5	6119	5989	5754	5531	5377	5266	5062
111.6	6193	6001	5707	5617	5408	5352	5037
111.7	6267	6009	5788	5544	5423	5349	5019
111.8	6162	5983	5722	5501	5405	5361	5097
111.9	6217	5898	5747	5526	5303	5334	5115
112	6135	5943	5723	5561	5443	5324	5085
112.1	6214	5964	5783	5581	5371	5348	5044
112.2	6150	5983	5751	5536	5385	5344	5018
112.3	6168	5958	5767	5489	5364	5342	4985
112.4	6119	5899	5725	5547	5334	5348	5016
112.5	6110	5905	5741	5537	5438	5283	5010
112.6	6194	5928	5797	5584	5354	5264	5068
112.7	6156	5954	5719	5466	5355	5371	5014
112.8	6152	5889	5753	5560	5440	5399	5097
112.9	6177	5947	5802	5502	5364	5302	4989
113	6112	5970	5720	5559	5433	5324	5074
113.1	6131	5966	5750	5533	5355	5398	5061
113.2	6162	5979	5792	5553	5365	5377	5098
113.3	6227	5978	5740	5568	5422	5375	5129
113.4	6147	5995	5800	5612	5376	5321	5073
113.5	6146	5929	5811	5493	5394	5357	5081
113.6	6172	5912	5817	5584	5359	5401	5062
113.7	6175	5907	5759	5512	5362	5356	5022
113.8	6115	5957	5745	5538	5338	5375	5016
113.9	6115	5951	5819	5586	5316	5363	5080
114	6181	5934	5808	5566	5380	5331	5025
114.1	6109	5991	5795	5555	5349	5271	5124
114.2	6120	5946	5807	5525	5423	5303	5030
114.3	6162	5931	5734	5541	5376	5334	5045
114.4	6157	5939	5712	5530	5401	5292	5080
114.5	6229	5922	5734	5512	5374	5307	5080
114.6	6178	5957	5762	5535	5349	5332	5044
114.7	6184	5955	5748	5494	5410	5297	5065
114.8	6158	5896	5781	5570	5340	5333	4999
114.9	6170	5910	5823	5610	5402	5333	5052
115	6168	5899	5835	5500	5406	5282	5042
115.1	6216	5991	5844	5580	5335	5389	5095
115.2	6196	5937	5816	5522	5373	5297	5037
115.3	6196	6047	5733	5513	5342	5253	5057
115.4	6213	5885	5781	5559	5375	5289	5041
115.5	6189	6015	5778	5510	5302	5362	5057
115.6	6173	5979	5805	5540	5365	5437	5087
115.7	6219	5991	5715	5468	5401	5377	4947
115.8	6218	5952	5828	5529	5403	5252	5016
115.9	6194	5928	5814	5531	5376	5332	5006
116	6235	5972	5792	5538	5386	5325	5030
116.1	6193	6006	5730	5535	5352	5290	5068
116.2	6175	6004	5760	5472	5405	5301	4942
116.3	6166	5936	5730	5392	5378	5313	5047
116.4	6149	5929	5753	5495	5394	5319	5055
116.5	6130	5936	5793	5575	5337	5308	5020
116.6	6151	5890	5772	5611	5363	5251	5057
116.7	6126	5954	5758	5609	5412	5312	4985
116.8	6130	5904	5727	5643	5372	5186	5054
116.9	6141	5890	5678	5552	5367	5306	5011
117	6136	5921	5704	5504	5326	5349	5022
117.1	6149	5897	5710	5487	5383	5274	5109
117.2	6195	5905	5734	5542	5436	5265	5004
117.3	6158	5966	5748	5460	5395	5361	5026
117.4	6150	5923	5789	5538	5365	5321	4967
117.5	6218	5971	5733	5512	5351	5332	5042
117.6	6098	5942	5709	5524	5384	5286	5007
117.7	6164	5884	5727	5527	5356	5265	4988
117.8	6132	5914	5774	5518	5360	5303	4993
117.9	6104	5924	5770	5556	5385	5281	5033
118	6112	5878	5765	5505	5386	5311	4974
118.1	6189	5910	5790	5544	5350	5308	5061
118.2	6144	5894	5749	5503	5354	5363	5059
118.3	6204	5895	5724	5519	5398	5324	5044
118.4	6182	5888	5782	5510	5320	5312	4996
118.5	6163	5938	5745	5532	5332	5378	5076
118.6	6134	5893	5698	5537	5334	5380	5036
118.7	6149	5916	5766	5628	5331	5372	4995
118.8	6135	5886	5726	5578	5315	5348	5026
118.9	6072	5986	5800	5577	5291	5330	5004
119	6119	6000	5738	5503	5281	5359	5061
119.1	6111	6000	5759	5565	5347	5312	5008
119.2	6182	5924	5825	5458	5319	5397	4921
119.3	6152	5932	5753	5478	5324	5220	4938
119.4	6189	5926	5770	5532	5327	5241	5040
119.5	6149	5913	5773	5593	5272	5336	5035
119.6	6125	5942	5751	5598	5295	5344	5018
119.7	6141	5947	5691	5504	5266	5289	5008
119.8	6183	5967	5744	5558	5270	5303	5032
119.9	6053	5995	5783	5565	5285	5256	5064
120	6077	5932	5732	5582	5330	5252	5011
120.1	6089	5959	5657	5522	5338	5287	4946
120.2	6135	5999	5730	5589	5305	5252	5008
120.3	6087	5932	5703	5535	5272	5290	5000
120.4	6058	5913	5759	5553	5356	5298	5062
120.5	6142	5902	5708	5582	5304	5256	5039
120.6	6184	5911	5763	5509	5425	5367	5002
120.7	6137	5932	5764	5502	5345	5286	5062
120.8	6153	5932	5751	5503	5367	5300	5010
120.9	6106	5936	5798	5557	5337	5355	5035
121	6154	5979	5748	5562	5317	5268	5054
121.1	6115	5928	5735	5526	5414	5319	5037
121.2	6176	6007	5718	5534	5355	5296	5005
121.3	6178	5892	5752	5587	5385	5381	5061
121.4	6133	5911	5717	5512	5264	5278	5091
121.5	6173	5884	5810	5523	5354	5228	5041
121.6	6157	5868	5761	5532	5370	5249	5072
121.7	6097	5861	5730	5582	5318	5283	5085
121.8	6121	5913	5757	5515	5298	5262	5065
121.9	6170	5921	5812	5513	5278	5279	5067
122	6103	5974	5780	5446	5247	5292	5140
122.1	6117	5898	5772	5537	5265	5318	5101
122.2	6079	5900	5799	5516	5382	5218	5064
122.3	6084	5856	5670	5607	5326	5315	5044
122.4	6126	5909	5747	5558	5340	5355	4983
122.5	6074	5854	5807	5537	5377	5321	5024
122.6	6024	5932	5816	5549	5277	5274	5049
122.7	6111	5921	5729	5501	5371	5311	5023
122.8	6130	5923	5757	5505	5337	5258	5059
122.9	6109	5903	5787	5521	5338	5329	5041
123	6114	5959	5777	5529	5282	5339	5071
123.1	6088	5896	5770	5576	5332	5315	5052
123.2	6171	5899	5788	5552	5345	5236	4982
123.3	6151	5906	5701	5519	5312	5301	5072
123.4	6140	5909	5830	5565	5370	5342	5030
123.5	6088	5960	5742	5489	5359	5244	5027
123.6	6075	5947	5797	5501	5274	5351	5044
123.7	6120	5843	5751	5546	5295	5255	5072
123.8	6120	5899	5781	5588	5238	5234	5114
123.9	6050	5994	5729	5560	5408	5307	5074
124	6087	5960	5846	5543	5333	5304	5114
124.1	6100	5941	5779	5548	5321	5332	5016
124.2	6155	5892	5801	5573	5354	5374	5011
124.3	6135	5923	5785	5552	5392	5320	5024
124.4	6165	5905	5779	5521	5343	5355	5082
124.5	6163	5894	5844	5571	5344	5417	5009
124.6	6094	5903	5741	5559	5399	5305	5021
124.7	6098	5905	5755	5530	5416	5290	5000
124.8	6099	5915	5745	5483	5414	5346	5031
124.9	6108	5881	5780	5547	5398	5316	5119
125	6102	5969	5790	5478	5337	5293	5033
125.1	6104	5934	5795	5568	5345	5378	5023
125.2	6149	5928	5813	5526	5408	5300	5056
125.3	6157	5898	5719	5529	5398	5361	5031
125.4	6143	5966	5765	5509	5442	5353	5103
125.5	6142	5940	5758	5557	5457	5386	5082
125.6	6080	5962	5740	5523	5422	5343	5021
125.7	6176	5931	5754	5524	5320	5355	4960
125.8	6162	5932	5775	5520	5351	5280	5073
125.9	6114	5947	5751	5565	5317	5217	5097
126	6136	5956	5668	5545	5380	5305	5102
126.1	6096	5970	5776	5543	5370	5246	5060
126.2	6125	5903	5724	5619	5380	5312	5074
126.3	6127	5961	5713	5586	5383	5374	5029
126.4	6126	5969	5740	5648	5383	5357	5143
126.5	6126	5916	5736	5602	5371	5273	5030
126.6	6161	5966	5711	5568	5348	5327	5014
126.7	6099	5873	5786	5619	5379	5363	5053
126.8	6152	5947	5734	5619	5370	5284	5068
126.9	6102	5949	5721	5578	5344	5300	5107
127	6108	5901	5784	5526	5341	5352	5037
127.1	6082	5919	5806	5539	5293	5358	4993
127.2	6094	5882	5818	5548	5369	5383	5049
127.3	6105	5879	5726	5594	5319	5289	5037
127.4	6188	5910	5859	5557	5390	5290	5052
127.5	6110	5891	5753	5619	5264	5240	5075
127.6	6180	5873	5800	5515	5344	5280	4986
127.7	6098	5936	5739	5539	5413	5278	5057
127.8	6100	5866	5734	5499	5371	5294	5029
127.9	6177	5905	5710	5566	5423	5248	5098
128	6150	5882	5697	5568	5346	5304	5019
128.1	6120	5847	5739	5511	5375	5349	5042
128.2	6096	5882	5764	5562	5363	5308	5041
128.3	6146	5812	5875	5528	5379	5355	5078
128.4	6089	5865	5759	5538	5347	5369	5056
128.5	6138	5903	5819	5559	5354	5315	5157
128.6	6119	5818	5766	5544	5343	5373	5138
128.7	6100	5909	5704	5585	5345	5340	5064
128.8	6128	5901	5778	5533	5319	5375	5064
128.9	6153	5858	5808	5545	5341	5383	5085
129	6110	5903	5777	5535	5408	5274	5107
129.1	6144	5915	5784	5616	5285	5291	5118
129.2	6150	5966	5827	5598	5274	5302	5119
129.3	6164	5900	5795	5580	5297	5271	5100
129.4	6155	5918	5761	5580	5315	5227	5097
129.5	6086	5877	5703	5584	5393	5211	5155
129.6	6089	5930	5761	5555	5380	5282	5132
129.7	6090	5894	5749	5599	5287	5244	5013
129.8	6118	5966	5828	5546	5314	5291	5074
129.9	6137	5941	5784	5629	5309	5283	5031
130	6099	5885	5773	5584	5333	5259	5069
130.1	6100	5903	5844	5647	5391	5309	5116
130.2	6084	5950	5829	5586	5349	5263	5067
130.3	6080	5928	5812	5594	5363	5311	5102
130.4	6093	5900	5780	5664	5251	5259	5075
130.5	6084	5911	5822	5611	5264	5254	5119
130.6	6162	5975	5792	5559	5327	5281	5081
130.7	6148	5858	5877	5621	5219	5267	5032
130.8	6175	5928	5757	5600	5299	5265	5066
130.9	6094	5978	5787	5548	5328	5223	5031
131	6154	5928	5757	5565	5263	5251	5073
131.1	6102	5901	5823	5576	5327	5272	5048
131.2	6016	5869	5802	5601	5264	5252	5089
131.3	6072	5937	5751	5622	5348	5272	5102
131.4	6145	5944	5746	5580	5297	5247	5095
131.5	6114	5932	5780	5528	5296	5187	5026
131.6	6108	5979	5838	5556	5353	5258	5126
131.7	6086	5888	5781	5507	5339	5322	5037
131.8	6105	5925	5855	5673	5312	5302	5125
131.9	6108	5898	5790	5590	5277	5319	5079
132	6013	5972	5780	5485	5310	5183	5065
132.1	6127	5862	5767	5564	5349	5258	5005
132.2	6140	5919	5813	5493	5280	5226	5022
132.3	6084	5921	5755	5508	5354	5316	5097
132.4	6110	5945	5780	5528	5372	5216	5078
132.5	6007	5950	5824	5553	5321	5270	5071
132.6	6105	5911	5756	5585	5357	5255	5128
132.7	6036	5940	5792	5582	5427	5284	5084
132.8	6107	5901	5789	5492	5363	5253	5179
132.9	6108	5926	5779	5519	5408	5194	5164
133	6126	5876	5761	5581	5331	5225	5095
133.1	6088	5946	5763	5554	5419	5284	5133
133.2	6094	5878	5802	5579	5346	5222	5041
133.3	6095	5918	5877	5586	5408	5244	5113
133.4	6056	5909	5715	5597	5336	5257	5080
133.5	6128	5959	5838	5527	5362	5279	5028
133.6	6181	5980	5802	5563	5365	5287	5133
133.7	6096	5974	5868	5582	5405	5307	5091
133.8	6091	5904	5817	5526	5393	5303	5070
133.9	6040	5885	5792	5535	5413	5315	5010
134	6115	5916	5812	5554	5365	5367	5116
134.1	6093	5927	5765	5528	5411	5316	5085
134.2	6078	5940	5843	5634	5334	5324	5081
134.3	6011	5900	5793	5545	5319	5305	5062
134.4	6087	5923	5750	5589	5381	5351	5021
134.5	6087	5897	5806	5560	5296	5286	5037
134.6	6022	5901	5750	5562	5295	5352	5052
134.7	6123	5889	5790	5528	5372	5348	5029
134.8	6077	5914	5730	5535	5352	5359	5036
134.9	6134	5910	5713	5621	5416	5302	5077
135	6124	5931	5777	5627	5310	5332	5136
135.1	6090	5926	5771	5587	5382	5273	5055
135.2	6163	5959	5819	5600	5447	5387	5074
135.3	6045	5929	5793	5566	5340	5289	5050
135.4	6107	5915	5793	5505	5368	5308	5082
135.5	6043	5939	5759	5541	5401	5289	5126
135.6	6140	5957	5779	5578	5389	5270	5058
135.7	6098	5954	5866	5619	5355	5287	5087
135.8	6128	5920	5796	5569	5394	5289	5045
135.9	6119	5884	5807	5665	5407	5335	4985
136	6109	5882	5816	5600	5357	5339	5074
136.1	6139	5932	5777	5630	5349	5261	5089
136.2	6112	5978	5820	5631	5369	5265	4963
136.3	6118	6016	5810	5628	5367	5311	4929
136.4	6095	5940	5838	5644	5339	5271	5044
136.5	6069	5894	5791	5609	5405	5241	4965
136.6	6022	5957	5781	5541	5305	5289	5019
136.7	6101	5895	5796	5627	5330	5260	4982
136.8	6085	5904	5841	5559	5429	5234	4992
136.9	6093	5957	5847	5655	5347	5309	4994
137	6079	5932	5717	5611	5382	5262	5104
137.1	6053	5860	5748	5588	5256	5279	5034
137.2	6028	5889	5750	5587	5289	5210	5033
137.3	6051	5940	5783	5554	5329	5220	5031
137.4	5998	5863	5816	5545	5353	5232	4997
137.5	6047	5862	5831	5651	5327	5257	4999
137.6	6098	5890	5796	5604	5296	5207	5009
137.7	6033	5822	5776	5644	5399	5314	5036
137.8	6024	5938	5783	5582	5332	5240	5003
137.9	6077	5834	5816	5623	5296	5161	5047
138	6033	5901	5839	5629	5394	5210	5069
138.1	6096	5900	5822	5574	5276	5238	4913
138.2	6097	5891	5733	5581	5276	5173	5070
138.3	6094	5951	5782	5631	5337	5258	4986
138.4	6135	5939	5811	5587	5363	5227	4998
138.5	6151	5876	5793	5645	5359	5208	5009
138.6	6131	5937	5827	5545	5323	5249	4992
138.7	6109	5904	5806	5521	5350	5285	5077
138.8	6091	5831	5796	5598	5353	5243	4995
138.9	6119	5925	5861	5591	5328	5239	5066
139	6129	5871	5826	5573	5284	5271	5003
139.1	6042	5847	5821	5643	5287	5293	4972
139.2	6032	5908	5793	5492	5385	5298	5024
139.3	6100	5869	5826	5562	5326	5335	4970
139.4	6065	5945	5752	5516	5304	5255	5054
139.5	6118	5891	5793	5655	5359	5354	4995
139.6	6042	5937	5771	5494	5269	5272	5046
139.7	6075	5876	5752	5546	5344	5338	5037
139.8	6066	5930	5763	5570	5340	5284	5031
139.9	6060	5929	5772	5573	5353	5280	4983
140	6066	5892	5829	5585	5340	5300	4987
140.1	6129	5941	5788	5572	5332	5374	4986
140.2	6003	6025	5845	5587	5384	5353	5005
140.3	6072	5924	5779	5595	5354	5269	4980
140.4	6101	5911	5724	5553	5332	5320	4968
140.5	6028	5909	5721	5558	5332	5256	4962
140.6	6074	5869	5765	5569	5335	5339	5030
140.7	6103	5912	5775	5556	5386	5264	4959
140.8	6055	5907	5751	5483	5316	5234	4992
140.9	6080	5922	5718	5491	5359	5260	5040
141	6076	5868	5741	5506	5314	5297	4978
141.1	6042	5904	5665	5534	5348	5233	4947
141.2	6037	5933	5750	5492	5358	5291	5013
141.3	6052	5828	5738	5565	5304	5260	4963
141.4	6065	5918	5740	5547	5371	5269	4989
141.5	6070	5911	5789	5568	5322	5301	5031
141.6	6046	5977	5821	5492	5322	5263	5023
141.7	6100	5907	5798	5490	5306	5333	5023
141.8	6064	5947	5813	5561	5327	5334	5039
141.9	6081	5888	5755	5581	5350	5310	5029
142	6147	5987	5829	5571	5365	5293	4939
142.1	6112	5862	5739	5525	5306	5299	5075
142.2	6113	5919	5765	5637	5377	5265	4996
142.3	6064	5838	5755	5559	5343	5202	5037
142.4	6075	5936	5696	5573	5307	5213	5056
142.5	6086	5906	5720	5535	5311	5233	5059
142.6	6101	5918	5738	5529	5335	5259	5092
142.7	6124	5985	5755	5499	5350	5292	5043
142.8	6130	5942	5707	5510	5299	5276	5072
142.9	6028	5846	5770	5613	5381	5308	5109
143	6066	5922	5735	5539	5412	5307	5078
143.1	6062	5914	5751	5573	5400	5269	5086
143.2	6108	5956	5703	5510	5391	5283	5100
143.3	6052	5938	5727	5570	5425	5305	5093
143.4	6079	5952	5780	5538	5323	5309	5123
143.5	6117	5984	5789	5594	5389	5299	5061
143.6	6127	5967	5766	5585	5489	5272	5056
143.7	6151	5980	5759	5595	5411	5272	5070
143.8	6025	5924	5791	5537	5435	5222	5123
143.9	6064	5912	5761	5550	5342	5268	5116
144	6121	5916	5755	5587	5397	5246	5068
144.1	6055	5909	5787	5597	5395	5259	5075
144.2	6083	5876	5733	5568	5370	5176	5077
144.3	6068	5961	5748	5551	5384	5282	5053
144.4	6106	6005	5770	5579	5368	5341	5074
144.5	6093	5963	5765	5622	5398	5327	5068
144.6	6059	5960	5738	5592	5431	5233	5111
144.7	6039	5964	5774	5596	5401	5288	5074
144.8	6103	5957	5773	5628	5364	5286	5085
144.9	6108	5968	5815	5602	5362	5325	5090
145	6089	5910	5844	5592	5371	5321	5075
145.1	6126	5883	5840	5559	5421	5277	5120
145.2	6086	5915	5776	5657	5421	5271	5029
145.3	6117	5883	5827	5624	5430	5237	5071
145.4	6113	5923	5804	5681	5405	5205	5118
145.5	6079	5955	5726	5610	5328	5287	5097
145.6	6114	6011	5810	5651	5453	5324	5059
145.7	6147	5952	5834	5666	5443	5275	5075
145.8	6091	5939	5844	5611	5387	5279	5102
145.9	6202	5939	5820	5648	5366	5342	5116
146	6144	5972	5832	5657	5392	5281	4989
146.1	6114	5906	5857	5585	5299	5234	5106
146.2	6148	5906	5796	5637	5390	5318	5083
146.3	6137	5930	5760	5597	5356	5286	5023
146.4	6089	5965	5752	5549	5388	5276	5129
146.5	6150	5957	5758	5626	5352	5230	5052
146.6	6080	5914	5795	5546	5393	5291	5049
146.7	6150	5937	5752	5531	5374	5275	5095
146.8	6128	5926	5811	5559	5393	5227	5109
146.9	6162	6000	5824	5621	5391	5283	5175
147	6083	5972	5821	5566	5436	5332	5105
147.1	6089	5939	5783	5603	5402	5315	5056
147.2	6108	5973	5804	5614	5422	5256	5008
147.3	6176	5937	5795	5567	5363	5298	4999
147.4	6142	5980	5845	5623	5408	5323	5090
147.5	6136	5916	5797	5500	5374	5391	5026
147.6	6162	5912	5835	5605	5358	5358	5033
147.7	6154	5924	5761	5564	5440	5362	5002
147.8	6122	5911	5764	5598	5377	5325	5066
147.9	6149	5898	5818	5595	5393	5241	5058
148	6116	5864	5776	5611	5386	5291	4960
148.1	6083	5939	5754	5572	5397	5303	5018
148.2	6075	6006	5792	5577	5434	5308	5011
148.3	6118	5938	5720	5624	5398	5342	4953
148.4	6086	5919	5755	5569	5280	5276	5069
148.5	6121	5934	5813	5642	5375	5234	4996
148.6	6143	5946	5800	5614	5354	5295	5122
148.7	6132	6012	5832	5620	5445	5376	5047
148.8	6151	5969	5825	5594	5426	5234	5059
148.9	6176	5929	5834	5607	5382	5260	5079
149	6086	5967	5800	5587	5453	5310	4963
149.1	6156	5975	5781	5623	5306	5289	4999
149.2	6111	5914	5837	5584	5365	5287	5037
149.3	6095	5978	5786	5647	5384	5308	4958
149.4	6116	5882	5773	5560	5299	5313	4981
149.5	6166	5965	5830	5595	5342	5306	5057
149.6	6132	5938	5749	5665	5396	5298	5044
149.7	6158	5984	5785	5621	5379	5262	5052
149.8	6124	5950	5868	5541	5340	5292	5033
149.9	6163	5950	5899	5588	5337	5298	4988
150	6185	5966	5785	5547	5440	5245	4975
150.1	6168	5995	5911	5569	5273	5291	5029
150.2	6152	5975	5881	5572	5400	5331	5056
150.3	6195	5931	5795	5579	5378	5311	5034
150.4	6157	5901	5744	5567	5356	5325	5025
150.5	6204	6013	5825	5561	5356	5328	5008
150.6	6171	5999	5809	5575	5402	5361	5085
150.7	6151	6015	5811	5585	5307	5303	5032
150.8	6165	5934	5832	5572	5394	5369	5014
150.9	6163	5998	5816	5585	5397	5361	5074
151	6206	5982	5810	5541	5376	5330	5045
151.1	6123	5992	5810	5617	5400	5271	5101
151.2	6196	5908	5773	5581	5382	5309	5086
151.3	6187	5934	5807	5629	5426	5239	5012
151.4	6175	5951	5797	5543	5397	5279	5048
151.5	6183	5997	5806	5551	5416	5280	5015
151.6	6165	5965	5849	5602	5363	5238	4977
151.7	6164	5949	5856	5583	5391	5261	5017
151.8	6118	6022	5815	5549	5355	5218	5091
151.9	6164	6013	5837	5557	5425	5320	5037
152	6192	5964	5784	5618	5392	5409	5155
152.1	6119	5995	5815	5596	5422	5308	5084
152.2	6138	5945	5768	5553	5424	5291	5027
152.3	6159	5910	5909	5574	5419	5258	5060
152.4	6183	6026	5808	5568	5458	5282	5060
152.5	6233	6002	5848	5629	5415	5326	4923
152.6	6235	6008	5775	5528	5433	5292	5102
152.7	6115	5946	5804	5570	5369	5308	5047
152.8	6139	5967	5780	5560	5344	5236	5025
152.9	6178	5975	5843	5537	5365	5296	5080
153	6121	5930	5822	5600	5387	5271	5027
153.1	6170	5933	5873	5626	5358	5219	5039
153.2	6108	5993	5777	5558	5340	5232	5026
153.3	6158	5996	5776	5539	5410	5284	4982
153.4	6088	6014	5855	5533	5440	5317	4997
153.5	6159	5945	5795	5577	5410	5227	5054
153.6	6202	6001	5801	5602	5368	5292	4968
153.7	6179	5941	5800	5568	5387	5316	5001
153.8	6134	5952	5770	5561	5429	5245	5009
153.9	6142	5988	5851	5577	5369	5238	4998
154	6198	6001	5774	5504	5429	5262	5000
154.1	6115	6014	5735	5580	5354	5232	5021
154.2	6192	5976	5731	5593	5364	5330	5061
154.3	6191	5935	5782	5587	5366	5272	5077
154.4	6259	5934	5786	5537	5415	5235	5114
154.5	6150	5978	5746	5597	5362	5324	5121
154.6	6180	5965	5811	5640	5416	5259	5088
154.7	6167	6000	5811	5647	5323	5329	5100
154.8	6224	5978	5759	5617	5287	5229	5099
154.9	6182	6031	5820	5566	5298	5304	5065
155	6155	6007	5843	5624	5341	5303	5098
155.1	6220	5930	5750	5686	5362	5233	5087
155.2	6175	5957	5871	5675	5344	5290	5109
155.3	6184	5932	5783	5621	5377	5300	5099
155.4	6168	6005	5824	5574	5356	5250	5095
155.5	6157	5950	5827	5547	5345	5248	5111
155.6	6172	5933	5757	5583	5402	5291	5025
155.7	6223	5936	5741	5661	5433	5210	5029
155.8	6180	5967	5793	5641	5387	5314	5080
155.9	6207	5947	5812	5606	5349	5328	5136
156	6159	5947	5774	5565	5428	5199	5130
156.1	6129	5924	5810	5568	5393	5300	5086
156.2	6152	5870	5841	5546	5355	5299	5108
156.3	6118	5954	5810	5566	5363	5253	5084
156.4	6110	5926	5760	5575	5378	5281	5109
156.5	6157	5961	5733	5655	5377	5248	5000
156.6	6144	5931	5749	5564	5412	5288	5099
156.7	6141	6003	5799	5588	5410	5236	5111
156.8	6095	5891	5768	5579	5447	5205	5004
156.9	6142	5962	5859	5613	5460	5253	5118
157	6191	5938	5798	5632	5381	5276	5105
157.1	6123	6001	5787	5605	5376	5278	5105
157.2	6188	5958	5781	5614	5312	5282	5111
157.3	6169	5945	5778	5638	5339	5299	5116
157.4	6191	5963	5785	5609	5356	5235	5077
157.5	6155	5977	5737	5558	5336	5230	5085
157.6	6170	5915	5816	5563	5422	5217	5034
157.7	6177	5922	5769	5597	5417	5261	5090
157.8	6166	5903	5838	5559	5359	5264	5071
157.9	6134	5971	5775	5629	5343	5234	5075
158	6203	5970	5792	5641	5347	5205	5070
158.1	6127	5950	5780	5651	5348	5268	5038
158.2	6131	5885	5767	5599	5361	5248	5010
158.3	6085	5927	5747	5641	5320	5241	5052
158.4	6149	5933	5834	5606	5372	5191	5083
158.5	6160	5990	5815	5662	5406	5301	5030
158.6	6158	5921	5765	5672	5379	5228	5011
158.7	6118	5928	5800	5597	5300	5258	5033
158.8	6180	5991	5764	5663	5405	5286	5069
158.9	6147	5968	5825	5682	5387	5227	5067
159	6195	5958	5797	5579	5349	5234	5014
159.1	6152	5918	5773	5600	5332	5229	5021
159.2	6183	6011	5740	5571	5402	5174	5039
159.3	6190	5998	5787	5636	5350	5258	5036
159.4	6124	5930	5743	5610	5336	5253	4988
159.5	6138	5957	5804	5582	5355	5214	4990
159.6	6166	5985	5704	5606	5363	5239	5092
159.7	6056	5977	5745	5516	5380	5270	5042
159.8	6119	5999	5794	5607	5339	5189	5006
159.9	6173	5984	5772	5629	5339	5239	4991
160	6145	5955	5713	5582	5391	5267	5013
160.1	6081	5917	5796	5611	5332	5285	4986
160.2	6147	5980	5756	5556	5382	5285	5036
160.3	6203	5963	5771	5539	5393	5162	5036
160.4	6103	5988	5773	5628	5303	5188	5048
160.5	6131	6036	5801	5630	5351	5204	5063
160.6	6159	6013	5747	5627	5284	5198	5055
160.7	6120	6049	5792	5607	5295	5229	5075
160.8	6146	5984	5823	5616	5340	5292	5066
160.9	6133	5937	5810	5658	5350	5288	4957
161	6118	5906	5875	5575	5400	5270	5048
161.1	6131	5877	5762	5602	5329	5224	5017
161.2	6150	5926	5812	5567	5336	5226	4980
161.3	6159	5989	5796	5602	5352	5271	5049
161.4	6167	5997	5805	5596	5347	5262	4999
161.5	6157	5948	5786	5576	5347	5272	5060
161.6	6113	5941	5722	5681	5311	5255	5037
161.7	6142	5877	5751	5579	5405	5258	5002
161.8	6208	5910	5753	5592	5336	5258	5040
161.9	6099	5918	5783	5646	5366	5227	4997
162	6101	5917	5794	5645	5363	5285	5007
162.1	6127	5971	5795	5577	5318	5242	4971
162.2	6157	5931	5754	5548	5340	5274	4919
162.3	6177	5942	5774	5581	5289	5272	5024
162.4	6159	5961	5683	5670	5320	5315	4988
162.5	6182	5964	5725	5555	5309	5333	4964
162.6	6160	5932	5755	5588	5362	5248	5039
162.7	6116	5917	5796	5564	5327	5307	5002
162.8	6084	5939	5790	5594	5322	5328	4940
162.9	6145	5879	5778	5547	5419	5387	5012
163	6175	5936	5814	5554	5396	5267	4955
163.1	6172	5901	5862	5504	5436	5269	4987
163.2	6133	5990	5800	5535	5407	5253	5000
163.3	6184	5980	5724	5633	5365	5253	5095
163.4	6136	5988	5788	5636	5387	5335	5062
163.5	6116	5948	5756	5611	5352	5346	4993
163.6	6124	5930	5762	5599	5378	5293	4939
163.7	6120	5993	5801	5598	5365	5225	5010
163.8	6142	5924	5783	5564	5308	5309	5005
163.9	6147	5903	5768	5551	5458	5263	5010
164	6062	5914	5792	5599	5283	5233	4949
164.1	6095	5949	5830	5608	5295	5391	4946
164.2	6135	5951	5826	5647	5348	5308	5020
164.3	6089	6015	5825	5634	5285	5312	5016
164.4	6137	5973	5803	5602	5411	5319	5055
164.5	6167	5872	5794	5616	5349	5316	4953
164.6	6172	5957	5805	5635	5375	5226	4897
164.7	6142	5975	5792	5636	5376	5318	5056
164.8	6133	5941	5794	5578	5355	5282	5033
164.9	6143	5940	5778	5538	5300	5311	5050
165	6175	5956	5802	5599	5325	5283	5027
165.1	6145	5931	5740	5575	5336	5294	5001
165.2	6158	5964	5828	5629	5274	5288	5039
165.3	6176	5936	5729	5574	5345	5279	5077
165.4	6123	5912	5806	5593	5307	5280	5029
165.5	6166	5970	5794	5565	5296	5281	5094
165.6	6072	5941	5760	5607	5318	5281	5042
165.7	6176	5947	5766	5581	5291	5180	4986
165.8	6123	5968	5778	5655	5330	5354	5129
165.9	6123	5881	5806	5488	5314	5275	5006
166	6161	5981	5759	5638	5311	5244	5111
166.1	6184	5937	5759	5597	5340	5235	5048
166.2	6216	6019	5859	5625	5322	5315	4948
166.3	6152	5967	5761	5631	5325	5260	4984
166.4	6093	5934	5847	5575	5308	5312	4965
166.5	6126	5937	5857	5583	5373	5264	4972
166.6	6187	5942	5815	5708	5317	5286	5061
166.7	6197	6002	5911	5587	5310	5300	5058
166.8	6126	5975	5827	5593	5344	5276	5018
166.9	6180	5914	5783	5670	5345	5320	5065
167	6178	5998	5798	5574	5346	5228	4991
167.1	6189	6013	5790	5661	5373	5320	5060
167.2	6139	5954	5766	5619	5366	5268	5012
167.3	6221	5986	5860	5671	5311	5361	4997
167.4	6182	5990	5796	5585	5361	5370	5049
167.5	6163	5951	5843	5615	5272	5308	5045
167.6	6159	5965	5802	5664	5302	5312	5031
167.7	6107	5931	5822	5645	5348	5289	5010
167.8	6173	5938	5793	5693	5280	5282	5023
167.9	6155	5999	5768	5654	5286	5304	5022
168	6118	6004	5751	5616	5317	5343	5002
168.1	6146	5961	5760	5643	5311	5346	5019
168.2	6118	5985	5713	5651	5339	5356	5089
168.3	6129	5955	5765	5597	5315	5251	5031
168.4	6160	5978	5779	5687	5405	5310	5136
168.5	6194	5957	5866	5658	5432	5290	5068
168.6	6113	5927	5809	5655	5375	5293	5069
168.7	6155	5941	5803	5591	5367	5331	5028
168.8	6160	5952	5835	5618	5416	5248	5030
168.9	6092	5962	5869	5572	5348	5291	5022
169	6123	5934	5786	5582	5394	5302	5092
169.1	6123	5932	5846	5678	5459	5254	5120
169.2	6178	5897	5823	5627	5291	5248	5040
169.3	6141	5936	5807	5543	5325	5191	5042
169.4	6186	5916	5810	5654	5358	5369	5042
169.5	6116	5981	5767	5585	5285	5268	5079
169.6	6197	5956	5777	5591	5349	5201	5030
169.7	6153	5947	5863	5583	5348	5228	5095
169.8	6166	5845	5859	5590	5385	5252	4968
169.9	6163	5948	5731	5622	5338	5256	5120
170	6178	5933	5850	5650	5303	5274	5014
170.1	6234	5904	5854	5589	5312	5315	5152
170.2	6197	5923	5780	5626	5355	5343	5000
170.3	6168	5870	5748	5566	5339	5295	5055
170.4	6178	5864	5754	5560	5392	5304	5065
170.5	6120	5894	5831	5593	5407	5336	4976
170.6	6186	5927	5801	5569	5362	5260	5091
170.7	6232	5953	5840	5574	5376	5305	5006
170.8	6136	5922	5805	5527	5365	5278	5042
170.9	6171	5946	5809	5470	5337	5256	4987
171	6145	5967	5766	5587	5335	5323	5039
171.1	6142	5941	5764	5603	5351	5212	5057
171.2	6233	5914	5729	5587	5320	5278	5088
171.3	6121	5903	5761	5576	5355	5303	5030
171.4	6127	5953	5776	5567	5356	5214	5086
171.5	6159	5960	5746	5563	5344	5193	5005
171.6	6129	5919	5715	5581	5347	5228	5125
171.7	6185	5947	5794	5572	5309	5290	5060
171.8	6226	5893	5860	5571	5331	5308	4951
171.9	6187	5976	5718	5544	5334	5282	5034
172	6188	6003	5750	5563	5320	5247	5046
172.1	6187	5984	5774	5566	5390	5323	4993
172.2	6195	5982	5776	5602	5280	5253	5087
172.3	6158	5993	5761	5527	5359	5257	5101
172.4	6175	5977	5797	5576	5352	5245	5008
172.5	6190	5970	5727	5535	5374	5250	5071
172.6	6145	5947	5792	5517	5369	5274	5063
172.7	6140	5981	5727	5494	5391	5273	5006
172.8	6175	6025	5801	5561	5445	5248	5047
172.9	6110	5871	5816	5613	5326	5282	5062
173	6167	6017	5799	5512	5389	5216	4996
173.1	6226	5981	5701	5592	5243	5277	5042
173.2	6150	5957	5743	5620	5279	5249	5059
173.3	6160	5956	5812	5605	5251	5259	5106
173.4	6100	5984	5788	5560	5227	5196	5026
173.5	6210	5907	5727	5602	5292	5294	5031
173.6	6124	5960	5782	5552	5245	5305	5045
173.7	6182	5962	5725	5546	5354	5270	5048
173.8	6177	5993	5818	5565	5299	5289	5055
173.9	6137	5989	5727	5575	5364	5246	5031
174	6181	5974	5731	5608	5352	5258	4992
174.1	6152	5944	5848	5594	5332	5233	4997
174.2	6130	5956	5795	5560	5326	5279	5029
174.3	6135	5952	5737	5540	5328	5301	4961
174.4	6111	5960	5747	5561	5365	5294	5010
174.5	6113	6000	5825	5577	5400	5259	5008
174.6	6120	5978	5753	5535	5316	5254	4942
174.7	6126	5902	5752	5595	5324	5265	4958
174.8	6114	5970	5828	5599	5353	5309	5037
174.9	6141	5934	5737	5549	5408	5236	5015
175	6093	5931	5716	5630	5334	5263	4926
175.1	6105	6037	5763	5619	5371	5249	5089
175.2	6137	5884	5760	5564	5368	5289	4985
175.3	6204	6010	5800	5624	5330	5249	5075
175.4	6127	5912	5776	5537	5387	5314	5046
175.5	6123	6037	5750	5561	5381	5290	5033
175.6	6142	5960	5717	5521	5404	5243	5050
175.7	6157	6072	5762	5588	5379	5287	5041
175.8	6135	6017	5741	5535	5385	5290	5003
175.9	6169	5989	5745	5584	5438	5271	4993
176	6078	5982	5808	5556	5377	5278	4988
176.1	6113	6008	5739	5537	5357	5315	5082
176.2	6102	5998	5772	5570	5386	5280	4987
176.3	6129	5989	5761	5567	5423	5268	5027
176.4	6132	6001	5785	5533	5372	5235	5054
176.5	6190	5974	5810	5638	5350	5324	4946
176.6	6183	5978	5753	5533	5318	5251	4953
176.7	6205	5979	5763	5624	5375	5195	4974
176.8	6182	5961	5795	5603	5338	5243	4996
176.9	6153	6055	5728	5557	5440	5266	4988
177	6210	5979	5809	5614	5475	5269	4978
177.1	6138	5952	5794	5655	5414	5219	4974
177.2	6180	6021	5790	5578	5393	5273	5025
177.3	6190	5961	5806	5602	5361	5319	4906
177.4	6138	5919	5781	5642	5396	5315	4897
177.5	6220	5991	5761	5650	5426	5289	5006
177.6	6178	6039	5785	5599	5394	5187	5039
177.7	6165	5964	5693	5593	5389	5177	5025
177.8	6167	5986	5713	5609	5340	5228	5044
177.9	6202	5919	5741	5629	5374	5270	5078
178	6023	5941	5724	5573	5378	5251	4987
178.1	6163	5991	5722	5588	5413	5267	4984
178.2	6167	5947	5791	5713	5390	5238	5006
178.3	6112	5978	5767	5599	5359	5256	5033
178.4	6156	5958	5801	5666	5333	5243	4959
178.5	6135	5990	5799	5682	5321	5217	5044
178.6	6132	5990	5776	5594	5370	5302	4954
178.7	6109	6017	5771	5517	5355	5284	5012
178.8	6153	6022	5733	5624	5395	5299	5021
178.9	6131	6036	5777	5656	5333	5251	5051
179	6135	6033	5749	5633	5334	5280	5025
179.1	6154	6027	5790	5640	5306	5263	5011
179.2	6181	5984	5806	5634	5329	5304	4980
179.3	6092	5963	5828	5619	5340	5257	4984
179.4	6153	5925	5846	5553	5342	5275	4977
179.5	6114	5996	5812	5528	5324	5254	4953
179.6	6198	5987	5897	5530	5370	5224	4993
179.7	6131	6009	5851	5553	5323	5257	5044
179.8	6205	6023	5848	5581	5308	5283	5071
179.9	6114	5972	5810	5578	5355	5194	4929
180	6254	5972	5772	5573	5371	5145	4964
180.1	6183	5957	5866	5550	5351	5258	5020
180.2	6131	6030	5783	5560	5263	5261	5066
180.3	6055	6024	5748	5556	5360	5212	5075
180.4	6094	5983	5823	5601	5354	5223	4989
180.5	6097	6018	5846	5549	5399	5262	5053
180.6	6142	6019	5817	5614	5428	5239	4970
180.7	6168	6072	5769	5528	5375	5182	4987
180.8	6117	6022	5697	5555	5261	5247	4975
180.9	6105	5977	5834	5564	5374	5351	4991
181	6150	6064	5788	5644	5384	5195	5010
181.1	6088	5942	5807	5593	5317	5238	4928
181.2	6175	5972	5798	5635	5296	5282	5000
181.3	6221	5971	5841	5610	5290	5293	4996
181.4	6122	5996	5810	5591	5357	5308	4978
181.5	6093	5958	5810	5660	5342	5273	5030
181.6	6129	5960	5807	5589	5418	5233	4982
181.7	6143	6006	5854	5588	5329	5259	5017
181.8	6088	6044	5779	5592	5332	5218	5026
181.9	6135	6017	5867	5663	5314	5225	5009
182	6106	5999	5868	5590	5333	5301	4984
182.1	6035	5975	5830	5567	5354	5261	4975
182.2	6096	6024	5847	5607	5351	5374	5033
182.3	6115	5965	5886	5565	5247	5338	5024
182.4	6085	5959	5831	5631	5301	5306	4970
182.5	6083	5958	5774	5606	5319	5285	5018
182.6	6156	6033	5818	5529	5374	5298	5016
182.7	6050	5951	5804	5604	5444	5288	5050
182.8	6064	6011	5795	5547	5330	5350	5060
182.9	6143	6004	5822	5542	5300	5308	5001
183	6110	6031	5777	5496	5313	5274	5020
183.1	6120	6000	5809	5515	5324	5251	5052
183.2	6163	5907	5763	5618	5338	5308	5058
183.3	6082	5984	5811	5578	5433	5264	4951
183.4	6094	5918	5767	5509	5403	5238	4998
183.5	6121	5966	5723	5507	5369	5272	5036
183.6	6138	6012	5876	5547	5280	5252	5028
183.7	6119	5966	5756	5573	5271	5241	5004
183.8	6218	5957	5806	5525	5355	5212	5033
183.9	6159	5977	5823	5459	5371	5234	4980
184	6142	5938	5812	5590	5286	5306	5017
184.1	6158	5929	5783	5497	5356	5257	5067
184.2	6109	5910	5789	5562	5365	5257	5034
184.3	6133	5933	5725	5527	5364	5263	5053
184.4	6097	5987	5782	5515	5399	5254	5041
184.5	6112	5956	5729	5521	5354	5295	5036
184.6	6129	5928	5756	5605	5277	5276	5073
184.7	6219	5944	5726	5614	5328	5208	5077
184.8	6130	5941	5762	5497	5366	5215	5060
184.9	6089	5993	5796	5599	5346	5230	5092
185	6139	5941	5785	5504	5358	5220	5068
185.1	6149	5986	5749	5587	5392	5235	5069
185.2	6104	5962	5738	5547	5362	5155	5086
185.3	6168	5937	5764	5564	5418	5346	5049
185.4	6143	5939	5791	5587	5417	5179	5026
185.5	6099	5948	5720	5567	5324	5254	5090
185.6	6089	5923	5800	5577	5323	5235	5112
185.7	6071	5957	5718	5670	5337	5219	5057
185.8	6151	5966	5762	5585	5381	5281	5088
185.9	6109	5963	5742	5543	5381	5177	5010
186	6097	5967	5785	5553	5346	5257	5106
186.1	6078	5957	5762	5686	5357	5307	5033
186.2	6124	5952	5817	5658	5386	5276	5062
186.3	6128	5941	5801	5567	5351	5257	5060
186.4	6114	5953	5759	5557	5393	5231	5068
186.5	6149	5951	5730	5578	5370	5251	5071
186.6	6103	5934	5748	5676	5357	5237	5024
186.7	6109	5969	5776	5595	5367	5208	5086
186.8	6190	5938	5748	5588	5351	5227	5022
186.9	6167	5973	5755	5574	5357	5199	5058
187	6131	5924	5802	5679	5380	5261	5001
187.1	6132	5905	5757	5578	5421	5243	5128
187.2	6074	5946	5758	5533	5365	5229	5052
187.3	6120	6008	5712	5531	5406	5258	5000
187.4	6125	5970	5800	5549	5374	5220	5023
187.5	6116	5996	5784	5576	5421	5285	5125
187.6	6156	5942	5795	5635	5418	5285	5098
187.7	6210	5947	5772	5550	5361	5251	5081
187.8	6107	5975	5794	5561	5407	5245	5012
187.9	6125	5958	5849	5494	5391	5243	5013
188	6131	5908	5752	5599	5390	5250	5041
188.1	6147	5993	5789	5641	5363	5159	5055
188.2	6107	5983	5783	5597	5390	5247	5069
188.3	6062	5993	5748	5579	5401	5223	5048
188.4	6141	5933	5786	5569	5395	5243	5032
188.5	6091	5944	5843	5574	5369	5274	5053
188.6	6134	5898	5755	5560	5369	5303	5022
188.7	6091	6040	5726	5579	5332	5230	5066
188.8	6050	5942	5772	5602	5309	5185	5035
188.9	6091	5986	5851	5592	5361	5315	5093
189	6149	5982	5717	5611	5328	5304	5047
189.1	6071	5922	5778	5579	5379	5278	5068
189.2	6099	5990	5785	5549	5377	5182	5040
189.3	6135	5924	5739	5528	5332	5195	5009
189.4	6103	5915	5759	5496	5403	5289	5049
189.5	6099	5962	5845	5549	5347	5286	5082
189.6	6082	5960	5749	5561	5389	5291	5083
189.7	6117	6016	5802	5518	5381	5311	5012
189.8	6128	5977	5795	5540	5411	5292	5055
189.9	6093	5903	5796	5540	5374	5243	5100
190	6069	5935	5755	5572	5420	5265	5015
190.1	6063	5926	5768	5563	5335	5224	5043
190.2	6109	6000	5777	5606	5381	5261	5024
190.3	6085	5946	5764	5562	5393	5262	5072
190.4	6082	5932	5714	5581	5408	5313	5048
190.5	6081	5857	5741	5493	5382	5256	5035
190.6	6140	5931	5870	5628	5435	5264	5049
190.7	6069	5928	5804	5601	5432	5293	5086
190.8	6117	5924	5825	5511	5360	5244	5063
190.9	6092	5942	5726	5511	5467	5335	5036
191	6071	5906	5747	5586	5345	5304	5087
191.1	6132	5917	5801	5567	5387	5300	5040
191.2	6096	5999	5718	5582	5474	5271	5049
191.3	6082	5942	5775	5519	5486	5295	5081
191.4	6150	6024	5796	5549	5480	5393	4973
191.5	6123	5918	5767	5588	5420	5390	4995
191.6	6070	5925	5803	5500	5418	5287	5033
191.7	6194	5909	5723	5557	5333	5243	5045
191.8	6068	5953	5737	5590	5302	5260	5028
191.9	6116	5995	5792	5511	5320	5248	4990
192	6131	5915	5792	5503	5340	5248	5067
192.1	6048	5920	5788	5545	5338	5255	5052
192.2	6118	5936	5749	5507	5316	5253	5009
192.3	6113	5943	5780	5537	5381	5228	5052
192.4	6122	5971	5820	5480	5429	5159	5076
192.5	6153	5905	5805	5585	5371	5321	4992
192.6	6089	5920	5813	5532	5369	5191	5006
192.7	6122	5959	5743	5541	5487	5196	4941
192.8	6176	5922	5810	5534	5454	5262	5019
192.9	6154	5847	5726	5591	5386	5199	5040
193	6122	5923	5768	5547	5393	5235	5141
193.1	6189	5952	5724	5506	5374	5221	4993
193.2	6086	5954	5855	5553	5405	5230	5025
193.3	6163	5936	5809	5538	5413	5302	5042
193.4	6095	5941	5820	5546	5339	5236	4979
193.5	6110	5918	5796	5623	5314	5250	5006
193.6	6108	5922	5819	5613	5249	5230	5039
193.7	6060	5931	5797	5573	5330	5227	5038
193.8	6096	5943	5760	5592	5420	5294	5077
193.9	6073	5906	5725	5535	5406	5187	5048
194	6129	5982	5802	5572	5390	5183	5041
194.1	6087	5959	5883	5597	5255	5258	5068
194.2	6157	5921	5810	5635	5334	5254	5043
194.3	6073	5979	5819	5584	5367	5287	5025
194.4	6082	5939	5808	5621	5367	5209	5073
194.5	6089	5925	5817	5568	5364	5274	5039
194.6	6152	5945	5745	5644	5413	5217	5037
194.7	6130	5933	5792	5549	5407	5228	5008
194.8	6018	5963	5802	5548	5350	5245	5016
194.9	6087	5954	5734	5526	5467	5189	4985
195	6087	5937	5816	5450	5451	5277	5016
195.1	6163	5930	5796	5518	5395	5256	4962
195.2	6158	5927	5765	5573	5418	5218	4988
195.3	6087	5919	5805	5507	5439	5234	4947
195.4	6068	5934	5835	5538	5375	5249	4934
195.5	6062	5882	5749	5581	5396	5251	5019
195.6	6087	5976	5759	5466	5361	5267	5073
195.7	6112	5966	5853	5531	5447	5254	4968
195.8	6092	5927	5784	5522	5388	5216	5021
195.9	6078	5912	5777	5550	5354	5198	4952
196	6118	5934	5751	5557	5455	5250	4970
196.1	6092	5993	5750	5579	5357	5354	4928
196.2	6182	5998	5757	5539	5384	5189	5013
196.3	6175	5960	5749	5587	5413	5332	4945
196.4	6155	5908	5810	5556	5440	5233	5024
196.5	6094	5947	5762	5579	5451	5227	5037
196.6	6159	6012	5729	5564	5485	5196	5064
196.7	6093	6008	5781	5638	5436	5306	5023
196.8	6082	6040	5819	5523	5446	5239	5092
196.9	6135	5923	5780	5552	5451	5267	5046
197	6149	5970	5821	5536	5409	5310	5042
197.1	6091	6045	5772	5597	5449	5265	5060
197.2	6120	5923	5769	5586	5376	5288	5091
197.3	6136	6006	5781	5600	5436	5243	5083
197.4	6130	5884	5805	5621	5408	5236	5015
197.5	6122	5970	5737	5541	5470	5197	5076
197.6	6075	5905	5801	5563	5409	5268	5080
197.7	6091	5980	5736	5567	5459	5232	5014
197.8	6160	5893	5791	5528	5437	5236	5010
197.9	6099	5964	5827	5568	5428	5321	5018
198	6041	5927	5782	5601	5450	5156	5105
198.1	6071	5919	5719	5609	5392	5255	5006
198.2	6089	5916	5789	5479	5420	5161	5041
198.3	6050	5889	5783	5556	5402	5183	4997
198.4	6007	5924	5724	5545	5446	5212	4941
198.5	6051	5970	5788	5540	5426	5235	5023
198.6	6096	5883	5718	5586	5382	5258	4951
198.7	6123	5952	5764	5625	5410	5179	4999
198.8	6051	5927	5798	5595	5366	5276	4929
198.9	6126	5985	5832	5617	5426	5217	5005
199	6128	5939	5793	5602	5413	5255	5024
199.1	6131	5926	5820	5559	5406	5183	4972
199.2	6091	5933	5816	5574	5379	5299	4905
199.3	6094	5939	5795	5624	5482	5241	4981
199.4	6057	5944	5800	5661	5404	5254	4991
199.5	6073	5994	5799	5559	5418	5294	5018
199.6	6093	5932	5840	5596	5401	5242	4958
199.7	6110	5949	5792	5570	5417	5278	5041
199.8	6080	5964	5741	5573	5370	5276	5075
[truncated: 28,002 more rows]

## Sheet: RMSD
Time(ns)	t3	t20	t37	t60	t80	t95	t70	t80	t95
0	0.0005072	0.0005058	0.0005019	0.0005039	0.0005054	0.0005088	0.0005059	0.0005054	0.0005088
0.1	0.131096	0.135771	0.139982	0.187755	0.189945	0.201382	0.187839	0.189945	0.201382
0.2	0.13931	0.150839	0.161069	0.199424	0.220389	0.20994	0.205916	0.220389	0.20994
0.3	0.148451	0.160857	0.16896	0.200721	0.272319	0.234351	0.206626	0.272319	0.234351
0.4	0.147756	0.174585	0.182188	0.212836	0.252705	0.250786	0.226916	0.252705	0.250786
0.5	0.152814	0.18413	0.192851	0.218001	0.268723	0.238663	0.238962	0.268723	0.238663
0.6	0.164448	0.188487	0.208815	0.225326	0.255012	0.235124	0.264336	0.255012	0.235124
0.7	0.173712	0.192911	0.211334	0.224505	0.267539	0.253237	0.260364	0.267539	0.253237
0.8	0.165818	0.229598	0.195466	0.237445	0.274338	0.265081	0.274644	0.274338	0.265081
0.9	0.177376	0.207255	0.21326	0.229586	0.277537	0.265439	0.273767	0.277537	0.265439
1	0.1751	0.20511	0.229074	0.226134	0.28587	0.293097	0.276992	0.28587	0.293097
1.1	0.177506	0.210969	0.228638	0.238434	0.28313	0.305798	0.276296	0.28313	0.305798
1.2	0.171754	0.213468	0.232147	0.262286	0.30644	0.314443	0.279841	0.30644	0.314443
1.3	0.174456	0.210174	0.215566	0.267108	0.300595	0.313526	0.30212	0.300595	0.313526
1.4	0.178945	0.213545	0.230942	0.278552	0.286127	0.316571	0.30702	0.286127	0.316571
1.5	0.174459	0.204138	0.214282	0.251654	0.307546	0.309449	0.300196	0.307546	0.309449
1.6	0.178204	0.208488	0.211912	0.274365	0.309318	0.332807	0.290477	0.309318	0.332807
1.7	0.177776	0.218461	0.237409	0.264963	0.31399	0.327518	0.297528	0.31399	0.327518
1.8	0.187957	0.224141	0.221463	0.300785	0.31582	0.353092	0.334502	0.31582	0.353092
1.9	0.179564	0.230933	0.217201	0.26357	0.317019	0.326801	0.30316	0.317019	0.326801
2	0.181643	0.217201	0.239398	0.246966	0.320302	0.321537	0.306225	0.320302	0.321537
2.1	0.197227	0.228098	0.232701	0.253258	0.337309	0.33802	0.310591	0.337309	0.33802
2.2	0.191882	0.22778	0.229394	0.234772	0.314861	0.351789	0.340658	0.314861	0.351789
2.3	0.183621	0.230406	0.218524	0.272669	0.330026	0.349133	0.313246	0.330026	0.349133
2.4	0.198347	0.232347	0.217516	0.268375	0.33053	0.353635	0.331113	0.33053	0.353635
2.5	0.187196	0.235274	0.229296	0.268081	0.329773	0.330898	0.317162	0.329773	0.330898
2.6	0.188193	0.230102	0.232821	0.308239	0.358178	0.368976	0.340612	0.358178	0.368976
2.7	0.200743	0.24192	0.247015	0.285956	0.367167	0.363697	0.334967	0.367167	0.363697
2.8	0.203748	0.231772	0.253441	0.279758	0.33816	0.387894	0.335015	0.33816	0.387894
2.9	0.204762	0.240956	0.245574	0.290115	0.337331	0.39376	0.339827	0.337331	0.39376
3	0.211548	0.232921	0.235362	0.262294	0.338885	0.400796	0.347158	0.338885	0.400796
3.1	0.203824	0.233412	0.235699	0.270608	0.343266	0.39376	0.364687	0.343266	0.39376
3.2	0.198926	0.229273	0.233872	0.310134	0.355906	0.414054	0.335521	0.355906	0.414054
3.3	0.198923	0.240389	0.243047	0.305075	0.352685	0.399613	0.342514	0.352685	0.399613
3.4	0.203776	0.241505	0.253238	0.302552	0.355277	0.429298	0.344869	0.355277	0.429298
3.5	0.198691	0.228879	0.256649	0.290025	0.345446	0.402062	0.330117	0.345446	0.402062
3.6	0.208959	0.233125	0.260746	0.319139	0.337581	0.393018	0.334826	0.337581	0.393018
3.7	0.199432	0.236029	0.254893	0.338689	0.379313	0.412602	0.336503	0.379313	0.412602
3.8	0.202756	0.251878	0.255038	0.340192	0.347476	0.430228	0.352002	0.347476	0.430228
3.9	0.199215	0.243149	0.254924	0.30272	0.352051	0.423422	0.364268	0.352051	0.423422
4	0.200737	0.236854	0.254136	0.327755	0.35367	0.409829	0.349197	0.35367	0.409829
4.1	0.195476	0.235691	0.255529	0.316362	0.330324	0.400652	0.342232	0.330324	0.400652
4.2	0.201138	0.249166	0.241819	0.319105	0.330395	0.41517	0.35562	0.330395	0.41517
4.3	0.205514	0.247798	0.238055	0.293777	0.335108	0.440232	0.347995	0.335108	0.440232
4.4	0.211557	0.253906	0.258284	0.302138	0.351614	0.415905	0.356814	0.351614	0.415905
4.5	0.208008	0.24591	0.252837	0.288505	0.361083	0.416323	0.338276	0.361083	0.416323
4.6	0.214192	0.245069	0.252061	0.288646	0.383014	0.411805	0.374261	0.383014	0.411805
4.7	0.207853	0.247254	0.241412	0.298737	0.394065	0.425675	0.367522	0.394065	0.425675
4.8	0.208892	0.250675	0.239468	0.283862	0.380343	0.413459	0.350615	0.380343	0.413459
4.9	0.203418	0.246631	0.257197	0.281803	0.360276	0.407477	0.370707	0.360276	0.407477
5	0.211844	0.24923	0.256803	0.280645	0.350262	0.393745	0.360285	0.350262	0.393745
5.1	0.206906	0.252124	0.251205	0.293079	0.360436	0.399552	0.340678	0.360436	0.399552
5.2	0.220609	0.249522	0.25275	0.300584	0.365371	0.398964	0.339894	0.365371	0.398964
5.3	0.216934	0.261774	0.261507	0.292814	0.381132	0.398305	0.348456	0.381132	0.398305
5.4	0.220748	0.259036	0.267549	0.288003	0.388006	0.374584	0.34872	0.388006	0.374584
5.5	0.219073	0.253281	0.251108	0.275514	0.369129	0.381361	0.326251	0.369129	0.381361
5.6	0.222153	0.271006	0.247608	0.276574	0.359764	0.3887	0.335428	0.359764	0.3887
5.7	0.228037	0.253646	0.260517	0.296768	0.345907	0.375807	0.325247	0.345907	0.375807
5.8	0.216568	0.258443	0.25012	0.295326	0.363366	0.395679	0.324952	0.363366	0.395679
5.9	0.225133	0.260786	0.263619	0.305096	0.350632	0.40994	0.341722	0.350632	0.40994
6	0.225411	0.249241	0.27272	0.302685	0.342317	0.410764	0.335164	0.342317	0.410764
6.1	0.215873	0.252281	0.262061	0.286711	0.357529	0.384002	0.360026	0.357529	0.384002
6.2	0.21192	0.251084	0.269982	0.296949	0.369142	0.381731	0.351083	0.369142	0.381731
6.3	0.218435	0.254923	0.252197	0.307509	0.369221	0.381351	0.354931	0.369221	0.381351
6.4	0.215395	0.271711	0.257678	0.296006	0.37768	0.367867	0.332335	0.37768	0.367867
6.5	0.221882	0.259581	0.262476	0.319996	0.378138	0.371156	0.34618	0.378138	0.371156
6.6	0.212719	0.272218	0.258839	0.303797	0.386236	0.387107	0.340684	0.386236	0.387107
6.7	0.220118	0.260328	0.251859	0.285636	0.367937	0.383725	0.324332	0.367937	0.383725
6.8	0.213558	0.253971	0.26393	0.291276	0.379511	0.374737	0.309668	0.379511	0.374737
6.9	0.219451	0.260996	0.269881	0.285648	0.371974	0.37816	0.33138	0.371974	0.37816
7	0.211595	0.263519	0.253322	0.295627	0.375271	0.384041	0.340617	0.375271	0.384041
7.1	0.221167	0.26589	0.255133	0.291765	0.373022	0.393662	0.341206	0.373022	0.393662
7.2	0.217801	0.261989	0.263869	0.293451	0.375563	0.398976	0.325117	0.375563	0.398976
7.3	0.226092	0.257109	0.260423	0.326478	0.375191	0.413233	0.345353	0.375191	0.413233
7.4	0.211356	0.261672	0.268427	0.30054	0.370814	0.381026	0.345283	0.370814	0.381026
7.5	0.216284	0.264825	0.265636	0.313966	0.377107	0.401887	0.317864	0.377107	0.401887
7.6	0.222394	0.265181	0.272092	0.310623	0.372225	0.38769	0.319168	0.372225	0.38769
7.7	0.220065	0.258018	0.278358	0.304735	0.3763	0.388815	0.352425	0.3763	0.388815
7.8	0.225714	0.269284	0.272244	0.292197	0.364167	0.367094	0.343095	0.364167	0.367094
7.9	0.22174	0.261643	0.262757	0.31596	0.377737	0.379283	0.36911	0.377737	0.379283
8	0.220526	0.26678	0.279698	0.308775	0.377632	0.368302	0.371634	0.377632	0.368302
8.1	0.216777	0.260182	0.281406	0.31116	0.373102	0.365142	0.354685	0.373102	0.365142
8.2	0.225803	0.271623	0.264942	0.346318	0.372211	0.356199	0.37486	0.372211	0.356199
8.3	0.224212	0.263524	0.277936	0.341213	0.3742	0.368695	0.373584	0.3742	0.368695
8.4	0.221274	0.257763	0.264206	0.334623	0.38856	0.374318	0.396806	0.38856	0.374318
8.5	0.2259	0.26864	0.269249	0.340973	0.408043	0.379635	0.395104	0.408043	0.379635
8.6	0.229197	0.276013	0.254784	0.342268	0.410554	0.399155	0.416231	0.410554	0.399155
8.7	0.22609	0.269791	0.246295	0.339983	0.412643	0.380133	0.390905	0.412643	0.380133
8.8	0.229471	0.276845	0.251181	0.323062	0.395691	0.398319	0.390005	0.395691	0.398319
8.9	0.234436	0.279663	0.246947	0.31327	0.386585	0.3807	0.394403	0.386585	0.3807
9	0.255216	0.275739	0.242498	0.299846	0.392092	0.383842	0.399942	0.392092	0.383842
9.1	0.248504	0.282631	0.24501	0.299501	0.399935	0.377715	0.378538	0.399935	0.377715
9.2	0.236747	0.275996	0.249836	0.294817	0.385628	0.397879	0.37631	0.385628	0.397879
9.3	0.239581	0.274301	0.256693	0.288601	0.386258	0.395883	0.371334	0.386258	0.395883
9.4	0.235866	0.271695	0.243336	0.303232	0.392009	0.375012	0.367424	0.392009	0.375012
9.5	0.236131	0.272576	0.244378	0.299735	0.383053	0.374537	0.381886	0.383053	0.374537
9.6	0.232551	0.268083	0.249061	0.294779	0.370707	0.396878	0.368777	0.370707	0.396878
9.7	0.237138	0.267959	0.250391	0.317939	0.380113	0.394534	0.363719	0.380113	0.394534
9.8	0.238459	0.278551	0.258107	0.323891	0.376265	0.386028	0.382118	0.376265	0.386028
9.9	0.238257	0.275963	0.253427	0.319023	0.369146	0.397975	0.376693	0.369146	0.397975
10	0.242985	0.264009	0.257888	0.319061	0.383678	0.424759	0.373451	0.383678	0.424759
10.1	0.250508	0.267232	0.253999	0.313443	0.366973	0.423859	0.36264	0.366973	0.423859
10.2	0.246355	0.266469	0.258804	0.308904	0.359431	0.409515	0.385999	0.359431	0.409515
10.3	0.237981	0.270716	0.260352	0.315244	0.355419	0.422332	0.353073	0.355419	0.422332
10.4	0.241832	0.263459	0.257725	0.325148	0.353827	0.432207	0.340937	0.353827	0.432207
10.5	0.250017	0.271624	0.264829	0.319084	0.354631	0.423056	0.333701	0.354631	0.423056
10.6	0.251277	0.277493	0.255972	0.317413	0.358263	0.410418	0.326353	0.358263	0.410418
10.7	0.246286	0.275434	0.24754	0.313038	0.365154	0.399132	0.347564	0.365154	0.399132
10.8	0.243414	0.268	0.250678	0.313267	0.366937	0.421811	0.33407	0.366937	0.421811
10.9	0.240311	0.273069	0.247762	0.311845	0.379424	0.417554	0.319304	0.379424	0.417554
11	0.247144	0.272677	0.270447	0.30464	0.37751	0.407222	0.32242	0.37751	0.407222
11.1	0.251175	0.271113	0.274311	0.324736	0.38514	0.401857	0.343541	0.38514	0.401857
11.2	0.249946	0.260708	0.270017	0.339938	0.370931	0.411956	0.348571	0.370931	0.411956
11.3	0.244158	0.266343	0.266065	0.345083	0.373434	0.412728	0.344873	0.373434	0.412728
11.4	0.24879	0.272361	0.258201	0.334904	0.395257	0.394426	0.337643	0.395257	0.394426
11.5	0.252508	0.269899	0.270072	0.332636	0.389199	0.421575	0.346454	0.389199	0.421575
11.6	0.246247	0.278788	0.269585	0.323943	0.384571	0.429931	0.339846	0.384571	0.429931
11.7	0.245577	0.270899	0.262888	0.324993	0.388748	0.411724	0.343212	0.388748	0.411724
11.8	0.242385	0.276494	0.258983	0.338324	0.384728	0.412852	0.338433	0.384728	0.412852
11.9	0.249411	0.280428	0.266835	0.330602	0.392754	0.408264	0.318016	0.392754	0.408264
12	0.237853	0.286049	0.275397	0.327385	0.411431	0.410313	0.33728	0.411431	0.410313
12.1	0.237998	0.288897	0.263045	0.334472	0.411267	0.426189	0.330351	0.411267	0.426189
12.2	0.251548	0.287466	0.258934	0.354221	0.403792	0.43791	0.33778	0.403792	0.43791
12.3	0.237623	0.284096	0.266873	0.350571	0.373058	0.431394	0.337537	0.373058	0.431394
12.4	0.238047	0.288829	0.2695	0.332112	0.368977	0.404405	0.325664	0.368977	0.404405
12.5	0.240293	0.290135	0.277567	0.349033	0.377533	0.409074	0.328293	0.377533	0.409074
12.6	0.238581	0.284282	0.290203	0.370781	0.380462	0.420153	0.343526	0.380462	0.420153
12.7	0.243246	0.290118	0.272219	0.347154	0.382091	0.407629	0.327606	0.382091	0.407629
12.8	0.237974	0.290358	0.276388	0.377825	0.382839	0.434379	0.332512	0.382839	0.434379
12.9	0.232305	0.29892	0.2621	0.36197	0.3822	0.420571	0.337684	0.3822	0.420571
13	0.233145	0.297696	0.268445	0.379778	0.3617	0.426517	0.339207	0.3617	0.426517
13.1	0.238085	0.296712	0.282789	0.36069	0.380182	0.433895	0.345622	0.380182	0.433895
13.2	0.240767	0.294541	0.283264	0.351046	0.361209	0.453514	0.351023	0.361209	0.453514
13.3	0.246911	0.295106	0.277686	0.356976	0.375411	0.447737	0.350754	0.375411	0.447737
13.4	0.246605	0.291316	0.275837	0.350208	0.370226	0.45465	0.342232	0.370226	0.45465
13.5	0.243258	0.296937	0.252219	0.364007	0.37421	0.44633	0.338305	0.37421	0.44633
13.6	0.249768	0.300477	0.245804	0.349353	0.379617	0.45723	0.316409	0.379617	0.45723
13.7	0.251075	0.296401	0.273426	0.342356	0.391361	0.435266	0.336774	0.391361	0.435266
13.8	0.259724	0.292544	0.268867	0.335226	0.366346	0.450054	0.332848	0.366346	0.450054
13.9	0.259023	0.30646	0.279522	0.341758	0.377606	0.470479	0.315056	0.377606	0.470479
14	0.250889	0.305354	0.282139	0.337337	0.381681	0.46246	0.320885	0.381681	0.46246
14.1	0.259022	0.310104	0.270264	0.340127	0.372869	0.461797	0.316942	0.372869	0.461797
14.2	0.26099	0.29967	0.273889	0.350758	0.389952	0.480314	0.332339	0.389952	0.480314
14.3	0.255862	0.303887	0.264831	0.342584	0.373809	0.486891	0.320153	0.373809	0.486891
14.4	0.259652	0.312476	0.276417	0.336752	0.378712	0.459769	0.329377	0.378712	0.459769
14.5	0.256539	0.302157	0.296668	0.337693	0.400051	0.458276	0.33584	0.400051	0.458276
14.6	0.253018	0.313959	0.288028	0.325522	0.395645	0.453857	0.346407	0.395645	0.453857
14.7	0.255304	0.310579	0.25847	0.326645	0.402576	0.460739	0.338293	0.402576	0.460739
14.8	0.261239	0.295305	0.262946	0.316672	0.38834	0.453021	0.340893	0.38834	0.453021
14.9	0.264776	0.294161	0.268277	0.326884	0.381734	0.44359	0.343736	0.381734	0.44359
15	0.257376	0.298832	0.271167	0.321013	0.392925	0.438001	0.333496	0.392925	0.438001
15.1	0.253522	0.298784	0.267663	0.341478	0.376614	0.433101	0.314757	0.376614	0.433101
15.2	0.262198	0.307491	0.27133	0.339241	0.377005	0.444234	0.341513	0.377005	0.444234
15.3	0.256835	0.300063	0.278393	0.326545	0.376545	0.444455	0.335633	0.376545	0.444455
15.4	0.250988	0.316364	0.266153	0.346545	0.391799	0.431648	0.353751	0.391799	0.431648
15.5	0.255908	0.307189	0.276627	0.340943	0.387757	0.427931	0.35578	0.387757	0.427931
15.6	0.25204	0.307327	0.25554	0.344091	0.393951	0.435864	0.344282	0.393951	0.435864
15.7	0.249481	0.311573	0.269632	0.344443	0.401236	0.436645	0.351881	0.401236	0.436645
15.8	0.249644	0.319602	0.273654	0.34583	0.394163	0.436186	0.335231	0.394163	0.436186
15.9	0.25451	0.296872	0.254401	0.349208	0.392192	0.427793	0.355446	0.392192	0.427793
16	0.267914	0.296721	0.264052	0.351869	0.385836	0.431547	0.343582	0.385836	0.431547
16.1	0.258916	0.304969	0.260137	0.332053	0.393688	0.433208	0.347463	0.393688	0.433208
16.2	0.274652	0.292622	0.273062	0.325159	0.396902	0.439776	0.337881	0.396902	0.439776
16.3	0.268764	0.302121	0.282076	0.335641	0.410089	0.434659	0.341755	0.410089	0.434659
16.4	0.255346	0.310154	0.268668	0.318273	0.39612	0.427511	0.335836	0.39612	0.427511
16.5	0.248118	0.313938	0.26212	0.329259	0.391512	0.433182	0.331539	0.391512	0.433182
16.6	0.257931	0.313446	0.268904	0.335674	0.401088	0.426706	0.350007	0.401088	0.426706
16.7	0.262885	0.319815	0.282209	0.326367	0.399391	0.420644	0.355459	0.399391	0.420644
16.8	0.255423	0.316487	0.263698	0.325561	0.395136	0.41298	0.341723	0.395136	0.41298
16.9	0.262719	0.31285	0.266606	0.346758	0.398727	0.427507	0.360016	0.398727	0.427507
17	0.246528	0.313562	0.267926	0.332301	0.405302	0.420386	0.367034	0.405302	0.420386
17.1	0.260093	0.30634	0.270813	0.339621	0.385014	0.427754	0.377223	0.385014	0.427754
17.2	0.257499	0.320035	0.270986	0.322948	0.382827	0.420951	0.358159	0.382827	0.420951
17.3	0.260336	0.31899	0.262782	0.337822	0.364484	0.415557	0.345107	0.364484	0.415557
17.4	0.267025	0.327293	0.258629	0.328071	0.384803	0.429228	0.351725	0.384803	0.429228
17.5	0.260453	0.333256	0.262024	0.338395	0.37803	0.423107	0.356195	0.37803	0.423107
17.6	0.266498	0.316457	0.26375	0.320324	0.386166	0.433276	0.354169	0.386166	0.433276
17.7	0.267373	0.31159	0.27725	0.336848	0.399227	0.452362	0.355994	0.399227	0.452362
17.8	0.273839	0.307051	0.273138	0.32256	0.38331	0.444767	0.342963	0.38331	0.444767
17.9	0.290623	0.309158	0.289145	0.313592	0.389603	0.461934	0.36457	0.389603	0.461934
18	0.289434	0.311873	0.269408	0.316292	0.392084	0.436146	0.361499	0.392084	0.436146
18.1	0.270159	0.303116	0.271737	0.312382	0.403978	0.45736	0.377897	0.403978	0.45736
18.2	0.263645	0.297542	0.262981	0.309273	0.452333	0.454755	0.373469	0.452333	0.454755
18.3	0.263916	0.302034	0.258723	0.32525	0.429142	0.445895	0.367745	0.429142	0.445895
18.4	0.275801	0.313465	0.253948	0.31829	0.421682	0.444304	0.365527	0.421682	0.444304
18.5	0.267078	0.307531	0.262044	0.299076	0.429121	0.446377	0.371673	0.429121	0.446377
18.6	0.267567	0.307953	0.249487	0.318225	0.445467	0.440604	0.35773	0.445467	0.440604
18.7	0.278169	0.308766	0.255407	0.317323	0.461623	0.430076	0.356928	0.461623	0.430076
18.8	0.257878	0.30761	0.248945	0.320891	0.438008	0.434375	0.371451	0.438008	0.434375
18.9	0.261628	0.312747	0.262384	0.322261	0.447691	0.438555	0.36511	0.447691	0.438555
19	0.266501	0.31043	0.265481	0.326651	0.435874	0.428257	0.366649	0.435874	0.428257
19.1	0.254906	0.316507	0.262242	0.319041	0.426175	0.434034	0.376357	0.426175	0.434034
19.2	0.27545	0.30686	0.279004	0.32313	0.445238	0.428489	0.37907	0.445238	0.428489
19.3	0.275729	0.31203	0.266199	0.31321	0.43401	0.45039	0.361287	0.43401	0.45039
19.4	0.282187	0.315044	0.276697	0.318128	0.454154	0.44366	0.384389	0.454154	0.44366
19.5	0.285874	0.309126	0.273045	0.312398	0.463384	0.43668	0.374812	0.463384	0.43668
19.6	0.28059	0.30924	0.269486	0.317086	0.461899	0.454911	0.373677	0.461899	0.454911
19.7	0.275197	0.31591	0.280882	0.306221	0.491814	0.446432	0.370018	0.491814	0.446432
19.8	0.277899	0.324143	0.28848	0.311276	0.458441	0.448253	0.371468	0.458441	0.448253
19.9	0.272436	0.320652	0.287925	0.319515	0.454367	0.466634	0.37838	0.454367	0.466634
20	0.257959	0.310247	0.283752	0.321604	0.475591	0.45755	0.38009	0.475591	0.45755
20.1	0.276112	0.316401	0.288343	0.322885	0.452444	0.476659	0.360279	0.452444	0.476659
20.2	0.264506	0.315839	0.28403	0.323072	0.440685	0.46025	0.380047	0.440685	0.46025
20.3	0.279884	0.31297	0.287964	0.336817	0.458123	0.464895	0.400616	0.458123	0.464895
20.4	0.282118	0.30607	0.287627	0.327568	0.444302	0.456361	0.404488	0.444302	0.456361
20.5	0.285409	0.30449	0.285764	0.321766	0.444494	0.452518	0.375414	0.444494	0.452518
20.6	0.295725	0.314484	0.285822	0.332747	0.415615	0.454527	0.364582	0.415615	0.454527
20.7	0.30159	0.311912	0.299532	0.308436	0.429144	0.446784	0.362246	0.429144	0.446784
20.8	0.308088	0.315069	0.295764	0.323037	0.41112	0.419185	0.373063	0.41112	0.419185
20.9	0.294123	0.315124	0.287892	0.320893	0.402539	0.420519	0.397562	0.402539	0.420519
21	0.290664	0.315667	0.285304	0.315779	0.402977	0.412633	0.387794	0.402977	0.412633
21.1	0.297105	0.314498	0.281474	0.313029	0.417144	0.444248	0.37064	0.417144	0.444248
21.2	0.303083	0.318819	0.304696	0.32252	0.410787	0.43498	0.382212	0.410787	0.43498
21.3	0.290663	0.327288	0.308903	0.332382	0.404914	0.448478	0.371729	0.404914	0.448478
21.4	0.291371	0.323263	0.309973	0.332188	0.411943	0.450963	0.370284	0.411943	0.450963
21.5	0.280608	0.317851	0.313183	0.333313	0.407858	0.452403	0.373194	0.407858	0.452403
21.6	0.281126	0.31394	0.316191	0.321221	0.429207	0.447659	0.375748	0.429207	0.447659
21.7	0.271435	0.313638	0.314412	0.321753	0.425026	0.446612	0.374573	0.425026	0.446612
21.8	0.271118	0.302773	0.312782	0.322855	0.427122	0.444185	0.372941	0.427122	0.444185
21.9	0.278793	0.291827	0.323114	0.31465	0.433686	0.467502	0.380442	0.433686	0.467502
22	0.283213	0.296098	0.305851	0.309368	0.468328	0.480297	0.38641	0.468328	0.480297
22.1	0.283018	0.295077	0.29948	0.292168	0.448498	0.455805	0.380808	0.448498	0.455805
22.2	0.280621	0.298475	0.283582	0.30552	0.422045	0.455068	0.37205	0.422045	0.455068
22.3	0.297379	0.288877	0.301129	0.322283	0.420814	0.435555	0.378463	0.420814	0.435555
22.4	0.285038	0.30499	0.311262	0.316372	0.432372	0.436776	0.38964	0.432372	0.436776
22.5	0.271906	0.310139	0.326385	0.318148	0.419924	0.430359	0.404261	0.419924	0.430359
22.6	0.296384	0.305339	0.325284	0.319239	0.434932	0.424837	0.39961	0.434932	0.424837
22.7	0.295755	0.303136	0.334092	0.311783	0.419292	0.424194	0.380774	0.419292	0.424194
22.8	0.295781	0.302877	0.31205	0.336707	0.424429	0.431222	0.380121	0.424429	0.431222
22.9	0.29803	0.297117	0.334661	0.339282	0.427647	0.441268	0.383273	0.427647	0.441268
23	0.301326	0.30058	0.303466	0.330661	0.426706	0.444449	0.376529	0.426706	0.444449
23.1	0.286613	0.30655	0.309328	0.321342	0.416245	0.448503	0.378476	0.416245	0.448503
23.2	0.283942	0.299048	0.324073	0.332351	0.405903	0.442484	0.387666	0.405903	0.442484
23.3	0.285874	0.307222	0.312751	0.341848	0.397344	0.449384	0.379729	0.397344	0.449384
23.4	0.289335	0.303882	0.324002	0.327587	0.413543	0.442303	0.389038	0.413543	0.442303
23.5	0.282557	0.306845	0.315806	0.34893	0.409121	0.416823	0.37628	0.409121	0.416823
23.6	0.273169	0.295072	0.291447	0.342617	0.396567	0.433605	0.378607	0.396567	0.433605
23.7	0.27958	0.300204	0.310837	0.334975	0.404607	0.432905	0.387278	0.404607	0.432905
23.8	0.295449	0.307895	0.308666	0.340903	0.406547	0.431254	0.38546	0.406547	0.431254
23.9	0.293849	0.30152	0.29814	0.350867	0.425935	0.431019	0.393283	0.425935	0.431019
24	0.30087	0.306881	0.304174	0.326676	0.413183	0.438524	0.375924	0.413183	0.438524
24.1	0.304004	0.312187	0.31963	0.338286	0.405881	0.438342	0.375516	0.405881	0.438342
24.2	0.296634	0.314049	0.312412	0.344912	0.404434	0.428568	0.395805	0.404434	0.428568
24.3	0.304139	0.327245	0.317782	0.343003	0.395576	0.452226	0.40816	0.395576	0.452226
24.4	0.312194	0.330808	0.315805	0.338684	0.414358	0.444835	0.391946	0.414358	0.444835
24.5	0.296718	0.330445	0.319427	0.36362	0.400331	0.447871	0.397793	0.400331	0.447871
24.6	0.299486	0.330168	0.31939	0.362718	0.409864	0.439791	0.397798	0.409864	0.439791
24.7	0.296771	0.31848	0.306642	0.340028	0.398462	0.448017	0.399947	0.398462	0.448017
24.8	0.291777	0.309009	0.318231	0.343174	0.409927	0.438345	0.402679	0.409927	0.438345
24.9	0.290729	0.301323	0.327064	0.339958	0.419287	0.43895	0.413341	0.419287	0.43895
25	0.29788	0.296336	0.333451	0.348424	0.418194	0.437991	0.394846	0.418194	0.437991
25.1	0.284385	0.308503	0.331081	0.355663	0.443556	0.444653	0.386562	0.443556	0.444653
25.2	0.295278	0.314395	0.355947	0.338269	0.443175	0.436867	0.376743	0.443175	0.436867
25.3	0.277726	0.309631	0.34621	0.33335	0.45807	0.427201	0.384697	0.45807	0.427201
25.4	0.288384	0.315858	0.336373	0.339709	0.445218	0.445878	0.380065	0.445218	0.445878
25.5	0.295221	0.324035	0.358085	0.341457	0.447873	0.451056	0.359766	0.447873	0.451056
25.6	0.288533	0.310258	0.347196	0.344489	0.430546	0.443186	0.366257	0.430546	0.443186
25.7	0.295776	0.313141	0.339695	0.334337	0.444976	0.449386	0.378379	0.444976	0.449386
25.8	0.283991	0.298358	0.335555	0.347167	0.438093	0.436649	0.379447	0.438093	0.436649
25.9	0.289635	0.306051	0.327502	0.339035	0.435021	0.44433	0.378152	0.435021	0.44433
26	0.287042	0.305203	0.339763	0.342425	0.432242	0.442212	0.389586	0.432242	0.442212
26.1	0.288896	0.310225	0.301289	0.361044	0.441959	0.428733	0.387363	0.441959	0.428733
26.2	0.287807	0.31037	0.319438	0.355559	0.43528	0.434862	0.395997	0.43528	0.434862
26.3	0.310494	0.325727	0.316259	0.34874	0.441712	0.420488	0.400229	0.441712	0.420488
26.4	0.288369	0.315797	0.294355	0.349029	0.437899	0.439261	0.405298	0.437899	0.439261
26.5	0.293234	0.325179	0.312632	0.343682	0.432115	0.445691	0.392794	0.432115	0.445691
26.6	0.30478	0.32281	0.317875	0.347317	0.455765	0.437991	0.407625	0.455765	0.437991
26.7	0.298401	0.30796	0.312015	0.351454	0.441342	0.456578	0.404398	0.441342	0.456578
26.8	0.297999	0.325956	0.308377	0.353642	0.424383	0.449537	0.394103	0.424383	0.449537
26.9	0.290697	0.337952	0.304808	0.36969	0.434523	0.444148	0.384565	0.434523	0.444148
27	0.294339	0.319245	0.299825	0.343193	0.438899	0.458823	0.416598	0.438899	0.458823
27.1	0.297994	0.315082	0.306669	0.354549	0.444033	0.445	0.413177	0.444033	0.445
27.2	0.297484	0.316058	0.294167	0.374902	0.437252	0.434503	0.397283	0.437252	0.434503
27.3	0.294166	0.313185	0.29037	0.346752	0.43978	0.45145	0.412946	0.43978	0.45145
27.4	0.297446	0.319338	0.279966	0.348516	0.432053	0.45383	0.412517	0.432053	0.45383
27.5	0.288789	0.324814	0.297048	0.347976	0.438709	0.456428	0.415963	0.438709	0.456428
27.6	0.300457	0.324913	0.306351	0.362428	0.44795	0.444066	0.399782	0.44795	0.444066
27.7	0.295593	0.338277	0.304869	0.352658	0.440785	0.444057	0.410313	0.440785	0.444057
27.8	0.289089	0.322761	0.305433	0.328718	0.423813	0.447837	0.398512	0.423813	0.447837
27.9	0.30558	0.325991	0.30065	0.335823	0.446864	0.441573	0.392193	0.446864	0.441573
28	0.309382	0.327183	0.295225	0.334442	0.444364	0.442026	0.399944	0.444364	0.442026
28.1	0.305992	0.312731	0.288001	0.332059	0.445591	0.456205	0.402616	0.445591	0.456205
28.2	0.300481	0.310198	0.293401	0.333334	0.430261	0.465077	0.412715	0.430261	0.465077
28.3	0.303702	0.315167	0.302886	0.3369	0.433519	0.451183	0.407582	0.433519	0.451183
28.4	0.313962	0.306978	0.311501	0.352397	0.444513	0.459979	0.401749	0.444513	0.459979
28.5	0.313841	0.311497	0.295978	0.354325	0.418565	0.458488	0.42624	0.418565	0.458488
28.6	0.309109	0.303665	0.302764	0.34667	0.432199	0.457645	0.423561	0.432199	0.457645
28.7	0.303464	0.308971	0.296542	0.353409	0.414521	0.450759	0.424256	0.414521	0.450759
28.8	0.307683	0.307685	0.299609	0.3671	0.423351	0.470142	0.425107	0.423351	0.470142
28.9	0.304164	0.311544	0.292102	0.363552	0.43479	0.457383	0.411588	0.43479	0.457383
29	0.301739	0.307329	0.289709	0.35315	0.440556	0.467879	0.396984	0.440556	0.467879
29.1	0.284949	0.305094	0.294297	0.380139	0.436805	0.473815	0.413588	0.436805	0.473815
29.2	0.289873	0.304668	0.291927	0.368885	0.414619	0.477623	0.4123	0.414619	0.477623
29.3	0.286313	0.302507	0.282904	0.378356	0.427438	0.469793	0.416876	0.427438	0.469793
29.4	0.296286	0.310136	0.292852	0.365912	0.445823	0.468958	0.410933	0.445823	0.468958
29.5	0.295666	0.315203	0.291063	0.361112	0.415232	0.472003	0.413019	0.415232	0.472003
29.6	0.300016	0.300236	0.285034	0.363859	0.404265	0.465469	0.416341	0.404265	0.465469
29.7	0.292779	0.296019	0.308047	0.350989	0.429466	0.479178	0.422164	0.429466	0.479178
29.8	0.291677	0.302173	0.314691	0.37186	0.41135	0.488757	0.402589	0.41135	0.488757
29.9	0.288575	0.293839	0.303395	0.384362	0.418197	0.469556	0.395774	0.418197	0.469556
30	0.294048	0.294977	0.309028	0.375349	0.418684	0.48257	0.390769	0.418684	0.48257
30.1	0.304409	0.305038	0.314592	0.368838	0.442031	0.475531	0.392755	0.442031	0.475531
30.2	0.303041	0.301217	0.298476	0.368367	0.438666	0.472147	0.396843	0.438666	0.472147
30.3	0.293919	0.300427	0.294911	0.359003	0.453408	0.466837	0.383984	0.453408	0.466837
30.4	0.296891	0.295692	0.310663	0.371354	0.485549	0.455758	0.383604	0.485549	0.455758
30.5	0.317827	0.297974	0.295096	0.361634	0.46379	0.458604	0.39607	0.46379	0.458604
30.6	0.311372	0.306453	0.293247	0.371951	0.451055	0.493044	0.412639	0.451055	0.493044
30.7	0.306596	0.295719	0.295989	0.368458	0.478514	0.479986	0.41157	0.478514	0.479986
30.8	0.306874	0.30769	0.304715	0.367179	0.456905	0.477925	0.412467	0.456905	0.477925
30.9	0.299573	0.300668	0.308821	0.365737	0.476699	0.46996	0.415537	0.476699	0.46996
31	0.299337	0.298314	0.312441	0.370287	0.444157	0.471356	0.415523	0.444157	0.471356
31.1	0.29897	0.299465	0.312536	0.363845	0.435378	0.462047	0.391543	0.435378	0.462047
31.2	0.28832	0.295693	0.311776	0.37137	0.479604	0.473661	0.404826	0.479604	0.473661
31.3	0.289112	0.307729	0.307305	0.375163	0.474102	0.48258	0.427162	0.474102	0.48258
31.4	0.296727	0.309381	0.313408	0.384445	0.480715	0.46647	0.416402	0.480715	0.46647
31.5	0.297959	0.304921	0.303563	0.384675	0.459777	0.45882	0.418349	0.459777	0.45882
31.6	0.297967	0.307349	0.306234	0.377359	0.467057	0.48261	0.401034	0.467057	0.48261
31.7	0.294147	0.315564	0.304638	0.361894	0.456123	0.487131	0.412108	0.456123	0.487131
31.8	0.306389	0.306097	0.300328	0.359971	0.453962	0.466103	0.407048	0.453962	0.466103
31.9	0.309296	0.31683	0.304628	0.359342	0.452749	0.454298	0.440863	0.452749	0.454298
32	0.297579	0.31566	0.300656	0.378401	0.444543	0.465156	0.420537	0.444543	0.465156
32.1	0.295295	0.31007	0.3075	0.379366	0.452316	0.462761	0.403044	0.452316	0.462761
32.2	0.301496	0.31685	0.314287	0.360441	0.462226	0.462409	0.442693	0.462226	0.462409
32.3	0.28879	0.313667	0.316196	0.346814	0.45868	0.459954	0.43024	0.45868	0.459954
32.4	0.299884	0.300553	0.320757	0.352757	0.465425	0.456427	0.408021	0.465425	0.456427
32.5	0.292669	0.305808	0.298947	0.356103	0.454809	0.46338	0.43343	0.454809	0.46338
32.6	0.28423	0.314621	0.30753	0.344055	0.454399	0.474685	0.416929	0.454399	0.474685
32.7	0.282574	0.314738	0.290756	0.335189	0.457837	0.461317	0.416686	0.457837	0.461317
32.8	0.287413	0.307936	0.29537	0.355908	0.46482	0.455772	0.437062	0.46482	0.455772
32.9	0.28813	0.308667	0.302028	0.358669	0.450066	0.463294	0.411994	0.450066	0.463294
33	0.28321	0.311465	0.306025	0.348563	0.451117	0.452041	0.399246	0.451117	0.452041
33.1	0.273423	0.303201	0.303034	0.344778	0.43445	0.460106	0.408816	0.43445	0.460106
33.2	0.271804	0.305321	0.303589	0.345116	0.444265	0.457344	0.398715	0.444265	0.457344
33.3	0.280856	0.310563	0.297774	0.336197	0.446133	0.463094	0.400905	0.446133	0.463094
33.4	0.280911	0.310953	0.286426	0.340165	0.458972	0.455605	0.393195	0.458972	0.455605
33.5	0.281247	0.302451	0.292197	0.34211	0.438268	0.474046	0.389413	0.438268	0.474046
33.6	0.290776	0.313767	0.298226	0.328853	0.465007	0.466564	0.406622	0.465007	0.466564
33.7	0.283446	0.315729	0.293495	0.341606	0.439402	0.46306	0.387523	0.439402	0.46306
33.8	0.277523	0.320273	0.299887	0.340518	0.454791	0.465335	0.401557	0.454791	0.465335
33.9	0.277243	0.320273	0.297057	0.340114	0.46929	0.4754	0.396524	0.46929	0.4754
34	0.279969	0.310755	0.293362	0.338993	0.449756	0.459783	0.393639	0.449756	0.459783
34.1	0.27992	0.312212	0.293844	0.349706	0.427833	0.473574	0.406195	0.427833	0.473574
34.2	0.285023	0.317648	0.290789	0.334018	0.414097	0.463778	0.416738	0.414097	0.463778
34.3	0.293729	0.311723	0.306581	0.329941	0.406602	0.481605	0.408307	0.406602	0.481605
34.4	0.29488	0.309304	0.305308	0.338415	0.397708	0.468286	0.419689	0.397708	0.468286
34.5	0.273409	0.317602	0.301383	0.341983	0.404866	0.469509	0.408274	0.404866	0.469509
34.6	0.275846	0.310647	0.309438	0.341722	0.421208	0.459556	0.40851	0.421208	0.459556
34.7	0.289028	0.305157	0.303949	0.33556	0.430132	0.477533	0.415962	0.430132	0.477533
34.8	0.286513	0.313246	0.287346	0.350699	0.422499	0.46304	0.419807	0.422499	0.46304
34.9	0.287049	0.313755	0.281328	0.346433	0.422553	0.463317	0.425801	0.422553	0.463317
35	0.288737	0.312167	0.278724	0.34272	0.42354	0.456484	0.43477	0.42354	0.456484
35.1	0.289548	0.319841	0.286977	0.337657	0.428196	0.477983	0.423033	0.428196	0.477983
35.2	0.284081	0.317942	0.291314	0.33966	0.442666	0.48368	0.421562	0.442666	0.48368
35.3	0.278493	0.313345	0.276873	0.340113	0.456684	0.473065	0.428633	0.456684	0.473065
35.4	0.277729	0.311754	0.280118	0.33134	0.442311	0.478339	0.407246	0.442311	0.478339
35.5	0.296706	0.31027	0.292015	0.336215	0.460302	0.475849	0.41686	0.460302	0.475849
35.6	0.287872	0.305305	0.283192	0.352636	0.426488	0.47948	0.423362	0.426488	0.47948
35.7	0.29573	0.316592	0.292684	0.339351	0.42456	0.479606	0.415538	0.42456	0.479606
35.8	0.280751	0.321997	0.301642	0.326159	0.417444	0.474618	0.416327	0.417444	0.474618
35.9	0.285593	0.32317	0.30045	0.342872	0.415257	0.477859	0.426969	0.415257	0.477859
36	0.286218	0.331329	0.304021	0.343259	0.416459	0.468093	0.424864	0.416459	0.468093
36.1	0.282735	0.314834	0.302865	0.334604	0.43853	0.477236	0.436435	0.43853	0.477236
36.2	0.288429	0.323243	0.301935	0.330177	0.455933	0.470859	0.447798	0.455933	0.470859
36.3	0.287118	0.317563	0.299254	0.337351	0.442366	0.464081	0.403649	0.442366	0.464081
36.4	0.280693	0.316482	0.300026	0.336734	0.448932	0.485108	0.424983	0.448932	0.485108
36.5	0.28418	0.318716	0.294901	0.348675	0.461003	0.463236	0.408461	0.461003	0.463236
36.6	0.281605	0.318699	0.298442	0.322352	0.442161	0.450487	0.420517	0.442161	0.450487
36.7	0.29194	0.311225	0.293687	0.345724	0.429629	0.463023	0.435245	0.429629	0.463023
36.8	0.294824	0.314905	0.306388	0.341954	0.450093	0.45341	0.419007	0.450093	0.45341
36.9	0.282135	0.319896	0.312204	0.354193	0.449823	0.460363	0.423987	0.449823	0.460363
37	0.271699	0.313346	0.314046	0.337406	0.458772	0.459976	0.41488	0.458772	0.459976
37.1	0.278254	0.315632	0.317338	0.346227	0.459798	0.475621	0.403997	0.459798	0.475621
37.2	0.281185	0.322099	0.313774	0.354409	0.468837	0.470527	0.422679	0.468837	0.470527
37.3	0.277143	0.31769	0.313323	0.349509	0.461997	0.456891	0.413455	0.461997	0.456891
37.4	0.293649	0.323791	0.318285	0.34965	0.44386	0.474024	0.419839	0.44386	0.474024
37.5	0.288356	0.325181	0.311354	0.34531	0.437627	0.463935	0.416262	0.437627	0.463935
37.6	0.295426	0.315549	0.323623	0.345246	0.426995	0.445342	0.410781	0.426995	0.445342
37.7	0.293534	0.31836	0.315958	0.355249	0.416237	0.45934	0.425937	0.416237	0.45934
37.8	0.295611	0.319767	0.333135	0.351107	0.426736	0.460271	0.409994	0.426736	0.460271
37.9	0.297162	0.319381	0.318395	0.344744	0.449784	0.455146	0.407681	0.449784	0.455146
38	0.299653	0.306299	0.318225	0.342636	0.449545	0.446788	0.412636	0.449545	0.446788
38.1	0.295495	0.320636	0.319825	0.339764	0.424855	0.443295	0.420265	0.424855	0.443295
38.2	0.295869	0.321703	0.328533	0.336033	0.43364	0.449859	0.428405	0.43364	0.449859
38.3	0.292704	0.325529	0.337969	0.359736	0.434988	0.443771	0.434192	0.434988	0.443771
38.4	0.300388	0.318402	0.335605	0.349644	0.440181	0.44178	0.437296	0.440181	0.44178
38.5	0.292889	0.316596	0.333829	0.357942	0.418781	0.435144	0.415648	0.418781	0.435144
38.6	0.303178	0.323239	0.328479	0.352745	0.442923	0.433852	0.420648	0.442923	0.433852
38.7	0.299143	0.330535	0.321508	0.350808	0.454592	0.456978	0.414216	0.454592	0.456978
38.8	0.303711	0.32216	0.312387	0.344661	0.448605	0.442168	0.41555	0.448605	0.442168
38.9	0.308903	0.31873	0.31329	0.344715	0.426235	0.452891	0.406229	0.426235	0.452891
39	0.308582	0.315704	0.312057	0.352507	0.42206	0.456596	0.402236	0.42206	0.456596
39.1	0.30143	0.318422	0.30528	0.351998	0.439362	0.458745	0.423015	0.439362	0.458745
39.2	0.295343	0.310566	0.308298	0.346372	0.448193	0.439567	0.411267	0.448193	0.439567
39.3	0.303426	0.317737	0.316263	0.351791	0.450283	0.448627	0.423723	0.450283	0.448627
39.4	0.300303	0.30685	0.302757	0.34582	0.430515	0.433404	0.417002	0.430515	0.433404
39.5	0.293145	0.309358	0.317315	0.331832	0.454211	0.428682	0.408625	0.454211	0.428682
39.6	0.304144	0.315826	0.31253	0.341002	0.468507	0.430632	0.433993	0.468507	0.430632
39.7	0.299838	0.317549	0.327671	0.342847	0.458398	0.45091	0.411456	0.458398	0.45091
39.8	0.292399	0.32556	0.323326	0.335515	0.445287	0.445679	0.41062	0.445287	0.445679
39.9	0.29494	0.323262	0.325666	0.327081	0.447756	0.42581	0.417436	0.447756	0.42581
40	0.29193	0.323026	0.314038	0.332381	0.433679	0.449973	0.423279	0.433679	0.449973
40.1	0.28492	0.324969	0.316776	0.330211	0.444634	0.452229	0.425137	0.444634	0.452229
40.2	0.284294	0.313505	0.316662	0.33553	0.421503	0.443623	0.427848	0.421503	0.443623
40.3	0.278815	0.328104	0.321127	0.333642	0.438599	0.454945	0.431137	0.438599	0.454945
40.4	0.278154	0.32323	0.308671	0.33786	0.452525	0.445632	0.439089	0.452525	0.445632
40.5	0.282166	0.316039	0.296711	0.346276	0.463271	0.452768	0.432349	0.463271	0.452768
40.6	0.276091	0.323064	0.306298	0.342714	0.480907	0.454731	0.428782	0.480907	0.454731
40.7	0.285454	0.318975	0.311798	0.342234	0.45413	0.448976	0.423707	0.45413	0.448976
40.8	0.292105	0.323952	0.306068	0.349918	0.490748	0.451059	0.407715	0.490748	0.451059
40.9	0.289419	0.320202	0.303374	0.345842	0.476341	0.448524	0.405642	0.476341	0.448524
41	0.295102	0.32432	0.298863	0.362526	0.469251	0.453403	0.394088	0.469251	0.453403
41.1	0.292119	0.314642	0.30271	0.35069	0.47692	0.454573	0.37274	0.47692	0.454573
41.2	0.29986	0.319061	0.295365	0.360589	0.481853	0.443271	0.397978	0.481853	0.443271
41.3	0.292812	0.320723	0.300853	0.359994	0.480268	0.433169	0.414463	0.480268	0.433169
41.4	0.291617	0.317982	0.310208	0.347279	0.481292	0.441199	0.423121	0.481292	0.441199
41.5	0.287486	0.327399	0.31313	0.352935	0.449063	0.449085	0.402038	0.449063	0.449085
41.6	0.287177	0.315671	0.316004	0.352908	0.463552	0.452721	0.422889	0.463552	0.452721
41.7	0.293986	0.326866	0.315974	0.343873	0.48012	0.461117	0.412136	0.48012	0.461117
41.8	0.293898	0.313285	0.318929	0.347061	0.495254	0.459408	0.41178	0.495254	0.459408
41.9	0.290288	0.308489	0.313345	0.36269	0.516614	0.465987	0.399065	0.516614	0.465987
42	0.27932	0.313874	0.305342	0.354613	0.514624	0.461228	0.399676	0.514624	0.461228
42.1	0.292924	0.313778	0.304149	0.374252	0.503103	0.458285	0.432862	0.503103	0.458285
42.2	0.292271	0.317614	0.305329	0.363682	0.511867	0.452084	0.409539	0.511867	0.452084
42.3	0.291335	0.308658	0.317712	0.35196	0.499922	0.456202	0.406663	0.499922	0.456202
42.4	0.289541	0.31263	0.320358	0.36337	0.507327	0.460482	0.420967	0.507327	0.460482
42.5	0.294959	0.315288	0.312188	0.370028	0.491909	0.469829	0.406108	0.491909	0.469829
42.6	0.29215	0.316062	0.319206	0.37759	0.504394	0.469901	0.409002	0.504394	0.469901
42.7	0.292578	0.325235	0.316669	0.369232	0.51166	0.474915	0.409148	0.51166	0.474915
42.8	0.29773	0.32237	0.312246	0.358941	0.495708	0.471487	0.422912	0.495708	0.471487
42.9	0.291463	0.313687	0.3229	0.37125	0.501325	0.469752	0.424791	0.501325	0.469752
43	0.29224	0.311056	0.324281	0.341717	0.497702	0.479729	0.436084	0.497702	0.479729
43.1	0.292868	0.313664	0.324945	0.350254	0.491535	0.477164	0.425571	0.491535	0.477164
43.2	0.291756	0.314511	0.312243	0.346091	0.480442	0.461109	0.425463	0.480442	0.461109
43.3	0.291391	0.312473	0.308617	0.347958	0.477338	0.45855	0.421097	0.477338	0.45855
43.4	0.286642	0.314947	0.317743	0.34104	0.48176	0.469264	0.446763	0.48176	0.469264
43.5	0.289527	0.310314	0.311369	0.354051	0.461639	0.459692	0.419076	0.461639	0.459692
43.6	0.277984	0.305472	0.312475	0.369891	0.461917	0.458569	0.429562	0.461917	0.458569
43.7	0.298014	0.313819	0.308803	0.362086	0.449163	0.446859	0.421525	0.449163	0.446859
43.8	0.288024	0.307703	0.325857	0.352282	0.430087	0.454243	0.422816	0.430087	0.454243
43.9	0.285104	0.306712	0.300885	0.361303	0.448464	0.464506	0.408975	0.448464	0.464506
44	0.277934	0.31158	0.304428	0.361785	0.460434	0.483933	0.404112	0.460434	0.483933
44.1	0.273572	0.30829	0.309203	0.36946	0.448416	0.468966	0.404595	0.448416	0.468966
44.2	0.290401	0.302572	0.318868	0.361004	0.452517	0.468528	0.413086	0.452517	0.468528
44.3	0.284641	0.311518	0.312451	0.357929	0.441707	0.471907	0.42462	0.441707	0.471907
44.4	0.284462	0.31503	0.328466	0.35634	0.465484	0.481389	0.425066	0.465484	0.481389
44.5	0.272308	0.315489	0.315469	0.344123	0.469637	0.484441	0.428621	0.469637	0.484441
44.6	0.279905	0.307841	0.334295	0.348765	0.458517	0.47709	0.417379	0.458517	0.47709
44.7	0.274954	0.309569	0.320513	0.355206	0.463126	0.463989	0.449491	0.463126	0.463989
44.8	0.285878	0.315031	0.321149	0.362752	0.449608	0.472355	0.45184	0.449608	0.472355
44.9	0.285506	0.315153	0.310696	0.35132	0.458354	0.473593	0.442935	0.458354	0.473593
45	0.291315	0.313439	0.31172	0.351948	0.457401	0.453889	0.431658	0.457401	0.453889
45.1	0.30448	0.321583	0.311597	0.365327	0.466963	0.456572	0.426049	0.466963	0.456572
45.2	0.295274	0.310833	0.320444	0.358027	0.472614	0.4689	0.446751	0.472614	0.4689
45.3	0.307221	0.311044	0.32669	0.345768	0.461493	0.453358	0.458375	0.461493	0.453358
45.4	0.296579	0.324591	0.315414	0.349878	0.455653	0.468167	0.437865	0.455653	0.468167
45.5	0.288868	0.321522	0.31082	0.34282	0.444324	0.482711	0.430902	0.444324	0.482711
45.6	0.283457	0.332813	0.29957	0.339846	0.458178	0.474822	0.416507	0.458178	0.474822
45.7	0.290529	0.334185	0.30962	0.34538	0.449555	0.476733	0.425846	0.449555	0.476733
45.8	0.292288	0.327356	0.315441	0.354043	0.447938	0.483681	0.432279	0.447938	0.483681
45.9	0.297909	0.318619	0.309056	0.350359	0.454296	0.46095	0.416289	0.454296	0.46095
46	0.281396	0.327118	0.317381	0.357482	0.462021	0.475512	0.416891	0.462021	0.475512
46.1	0.286515	0.320252	0.309004	0.353853	0.446645	0.476098	0.416972	0.446645	0.476098
46.2	0.302428	0.320318	0.307059	0.345988	0.454526	0.46956	0.403218	0.454526	0.46956
46.3	0.298131	0.324658	0.294552	0.354571	0.456234	0.475421	0.425047	0.456234	0.475421
46.4	0.293064	0.322384	0.306772	0.35371	0.445652	0.471016	0.413337	0.445652	0.471016
46.5	0.289508	0.314783	0.311856	0.365894	0.445701	0.465551	0.416799	0.445701	0.465551
46.6	0.286913	0.331336	0.313796	0.355593	0.436729	0.462911	0.417735	0.436729	0.462911
46.7	0.284087	0.324849	0.304177	0.359042	0.453468	0.472164	0.416365	0.453468	0.472164
46.8	0.295915	0.322762	0.29585	0.358115	0.447245	0.482819	0.416164	0.447245	0.482819
46.9	0.289407	0.333632	0.295602	0.360932	0.435659	0.468289	0.43288	0.435659	0.468289
47	0.290704	0.325037	0.299315	0.362993	0.451885	0.4786	0.426479	0.451885	0.4786
47.1	0.284775	0.31839	0.302681	0.363345	0.448598	0.467836	0.418459	0.448598	0.467836
47.2	0.286319	0.324466	0.309256	0.343859	0.45547	0.478164	0.416568	0.45547	0.478164
47.3	0.276446	0.330735	0.322619	0.353739	0.463531	0.45621	0.408444	0.463531	0.45621
47.4	0.278732	0.32162	0.306848	0.365011	0.473125	0.478721	0.406049	0.473125	0.478721
47.5	0.270394	0.315666	0.306283	0.365899	0.474086	0.470259	0.41193	0.474086	0.470259
47.6	0.276641	0.319915	0.311438	0.361581	0.481956	0.463741	0.422894	0.481956	0.463741
47.7	0.276674	0.308294	0.317888	0.357318	0.482121	0.479153	0.424023	0.482121	0.479153
47.8	0.275053	0.317933	0.323914	0.335896	0.476337	0.449588	0.41662	0.476337	0.449588
47.9	0.279547	0.324684	0.312049	0.346602	0.46565	0.478977	0.400573	0.46565	0.478977
48	0.280108	0.338478	0.304948	0.342587	0.483976	0.47992	0.42452	0.483976	0.47992
48.1	0.272957	0.326031	0.312254	0.339723	0.471942	0.461808	0.422564	0.471942	0.461808
48.2	0.285681	0.323349	0.324332	0.337767	0.46473	0.456634	0.421799	0.46473	0.456634
48.3	0.291157	0.31966	0.331063	0.351693	0.452292	0.459916	0.429768	0.452292	0.459916
48.4	0.289372	0.325698	0.326462	0.345019	0.440701	0.464757	0.434019	0.440701	0.464757
48.5	0.289097	0.315579	0.314466	0.338492	0.441458	0.45547	0.421079	0.441458	0.45547
48.6	0.290512	0.33301	0.313696	0.353477	0.443828	0.456132	0.419927	0.443828	0.456132
48.7	0.286238	0.323819	0.316852	0.360617	0.445196	0.463336	0.437907	0.445196	0.463336
48.8	0.289561	0.333853	0.30342	0.332606	0.438242	0.46033	0.428593	0.438242	0.46033
48.9	0.294848	0.320844	0.30962	0.352826	0.460976	0.478594	0.433145	0.460976	0.478594
49	0.286108	0.334037	0.313256	0.338894	0.460859	0.473962	0.423643	0.460859	0.473962
49.1	0.288533	0.341547	0.327896	0.334716	0.469961	0.466089	0.419819	0.469961	0.466089
49.2	0.288621	0.332383	0.323414	0.333801	0.461708	0.471126	0.431069	0.461708	0.471126
49.3	0.286697	0.331425	0.317441	0.323458	0.445337	0.457326	0.417672	0.445337	0.457326
49.4	0.290633	0.315925	0.306208	0.342315	0.45929	0.465705	0.415862	0.45929	0.465705
49.5	0.294076	0.32013	0.324834	0.332191	0.455064	0.47797	0.412115	0.455064	0.47797
49.6	0.285563	0.311472	0.319327	0.348071	0.457129	0.481933	0.406469	0.457129	0.481933
49.7	0.291783	0.336211	0.317319	0.334913	0.446875	0.472672	0.411018	0.446875	0.472672
49.8	0.296423	0.329337	0.313723	0.322224	0.458989	0.470094	0.401252	0.458989	0.470094
49.9	0.299515	0.325243	0.319613	0.344065	0.451557	0.478492	0.406124	0.451557	0.478492
50	0.306129	0.320638	0.30935	0.334786	0.441852	0.471428	0.405995	0.441852	0.471428
50.1	0.286185	0.329919	0.315997	0.340559	0.452494	0.500801	0.422377	0.452494	0.500801
50.2	0.296502	0.341721	0.317115	0.336148	0.456768	0.509055	0.419085	0.456768	0.509055
50.3	0.293468	0.320673	0.307841	0.334211	0.457388	0.499786	0.401245	0.457388	0.499786
50.4	0.301651	0.325636	0.310931	0.337301	0.436406	0.509481	0.415593	0.436406	0.509481
50.5	0.298034	0.325937	0.305953	0.346771	0.441507	0.486338	0.426295	0.441507	0.486338
50.6	0.285589	0.327498	0.311243	0.343178	0.444686	0.463123	0.440377	0.444686	0.463123
50.7	0.290286	0.319058	0.305533	0.338515	0.447251	0.453824	0.422134	0.447251	0.453824
50.8	0.274046	0.324313	0.319569	0.337176	0.452829	0.453173	0.413017	0.452829	0.453173
50.9	0.281874	0.319285	0.316294	0.338426	0.443489	0.472989	0.407511	0.443489	0.472989
51	0.290934	0.307541	0.318727	0.33118	0.455002	0.472	0.408461	0.455002	0.472
51.1	0.298158	0.325753	0.316558	0.318046	0.450163	0.46488	0.409249	0.450163	0.46488
51.2	0.286499	0.316138	0.324033	0.323253	0.43991	0.470412	0.402429	0.43991	0.470412
51.3	0.279353	0.304621	0.323285	0.321611	0.436742	0.461837	0.404892	0.436742	0.461837
51.4	0.276562	0.314139	0.30406	0.321346	0.455017	0.481023	0.406764	0.455017	0.481023
51.5	0.277811	0.315003	0.312691	0.324576	0.449718	0.469822	0.40625	0.449718	0.469822
51.6	0.280581	0.320729	0.310505	0.326665	0.440621	0.464775	0.401763	0.440621	0.464775
51.7	0.278199	0.319393	0.310675	0.323217	0.454549	0.463862	0.398007	0.454549	0.463862
51.8	0.278545	0.319673	0.330555	0.322705	0.448403	0.484415	0.397593	0.448403	0.484415
51.9	0.278118	0.325812	0.328171	0.338446	0.45332	0.475935	0.399224	0.45332	0.475935
52	0.277932	0.322786	0.31904	0.322518	0.45126	0.484871	0.40089	0.45126	0.484871
52.1	0.287614	0.315933	0.325082	0.332096	0.433691	0.47206	0.396519	0.433691	0.47206
52.2	0.274897	0.308011	0.32406	0.340725	0.445511	0.485008	0.408823	0.445511	0.485008
52.3	0.279159	0.319171	0.318701	0.328443	0.45367	0.484184	0.406948	0.45367	0.484184
52.4	0.274537	0.319301	0.322568	0.347543	0.457824	0.48532	0.415679	0.457824	0.48532
52.5	0.28156	0.314552	0.309095	0.349813	0.45891	0.467724	0.428374	0.45891	0.467724
52.6	0.282999	0.318948	0.325235	0.329662	0.462714	0.483223	0.416434	0.462714	0.483223
52.7	0.285994	0.312542	0.323625	0.335586	0.461979	0.467667	0.41406	0.461979	0.467667
52.8	0.277566	0.315041	0.315474	0.340332	0.449782	0.494706	0.403305	0.449782	0.494706
52.9	0.286848	0.322269	0.305608	0.340053	0.447487	0.46003	0.400675	0.447487	0.46003
53	0.273867	0.318191	0.303227	0.335341	0.441292	0.467851	0.409278	0.441292	0.467851
53.1	0.282994	0.329997	0.302169	0.320798	0.436201	0.46533	0.430697	0.436201	0.46533
53.2	0.277987	0.321529	0.305941	0.330968	0.453203	0.46764	0.418217	0.453203	0.46764
53.3	0.283125	0.319706	0.300191	0.332124	0.446212	0.468784	0.415287	0.446212	0.468784
53.4	0.292023	0.325873	0.304752	0.322904	0.454067	0.475803	0.40878	0.454067	0.475803
53.5	0.284755	0.338023	0.304565	0.329364	0.472174	0.492285	0.405378	0.472174	0.492285
53.6	0.291919	0.343043	0.307668	0.343355	0.448616	0.494553	0.412422	0.448616	0.494553
53.7	0.287507	0.342762	0.308022	0.346606	0.444888	0.480582	0.398098	0.444888	0.480582
53.8	0.287908	0.331136	0.311541	0.339365	0.448962	0.485614	0.405326	0.448962	0.485614
53.9	0.286337	0.330471	0.316386	0.337042	0.475597	0.476233	0.418321	0.475597	0.476233
54	0.280882	0.339113	0.319055	0.334389	0.466499	0.469818	0.408993	0.466499	0.469818
54.1	0.280277	0.330293	0.317074	0.33555	0.451568	0.490176	0.386971	0.451568	0.490176
54.2	0.291156	0.343091	0.317779	0.323959	0.441049	0.48914	0.400025	0.441049	0.48914
54.3	0.288592	0.334013	0.326355	0.335096	0.463784	0.466553	0.395676	0.463784	0.466553
54.4	0.29044	0.32881	0.318039	0.33103	0.464238	0.462496	0.403508	0.464238	0.462496
54.5	0.290741	0.332782	0.314824	0.324381	0.458678	0.482657	0.410278	0.458678	0.482657
54.6	0.294482	0.321851	0.321575	0.335629	0.464192	0.473431	0.423693	0.464192	0.473431
54.7	0.300596	0.327896	0.322187	0.332507	0.466606	0.477037	0.41342	0.466606	0.477037
54.8	0.306938	0.32922	0.335068	0.325504	0.457094	0.468667	0.412081	0.457094	0.468667
54.9	0.303883	0.339029	0.325318	0.33107	0.446734	0.475094	0.421375	0.446734	0.475094
55	0.303142	0.332602	0.337591	0.339889	0.449998	0.477241	0.415172	0.449998	0.477241
55.1	0.30102	0.34247	0.334653	0.329638	0.452435	0.467791	0.41957	0.452435	0.467791
55.2	0.306729	0.332898	0.317816	0.330785	0.4689	0.473721	0.40209	0.4689	0.473721
55.3	0.296993	0.333416	0.308108	0.337598	0.479213	0.470858	0.400328	0.479213	0.470858
55.4	0.303973	0.330403	0.32218	0.331722	0.490976	0.47418	0.399521	0.490976	0.47418
55.5	0.308744	0.328687	0.32701	0.335446	0.489194	0.481192	0.392932	0.489194	0.481192
55.6	0.302995	0.315753	0.318205	0.321489	0.481847	0.478484	0.408641	0.481847	0.478484
55.7	0.310737	0.31093	0.314867	0.344314	0.48373	0.460806	0.390675	0.48373	0.460806
55.8	0.317269	0.305777	0.301696	0.342032	0.479671	0.464637	0.410089	0.479671	0.464637
55.9	0.301756	0.310932	0.297987	0.336862	0.476458	0.471072	0.401427	0.476458	0.471072
56	0.299627	0.316986	0.305613	0.347135	0.478063	0.476599	0.40069	0.478063	0.476599
56.1	0.303027	0.305229	0.309249	0.348929	0.482835	0.479235	0.399906	0.482835	0.479235
56.2	0.307481	0.316846	0.323525	0.364354	0.475788	0.484195	0.397938	0.475788	0.484195
56.3	0.291462	0.3083	0.319168	0.377911	0.472723	0.475223	0.401305	0.472723	0.475223
56.4	0.290222	0.314437	0.315563	0.368953	0.472585	0.46401	0.405759	0.472585	0.46401
56.5	0.29297	0.314038	0.322936	0.379865	0.465595	0.467221	0.412172	0.465595	0.467221
56.6	0.29404	0.318009	0.304237	0.381574	0.466186	0.461298	0.410154	0.466186	0.461298
56.7	0.285513	0.315673	0.314492	0.356625	0.466658	0.464876	0.413147	0.466658	0.464876
56.8	0.291009	0.322611	0.311673	0.385652	0.454929	0.478344	0.409942	0.454929	0.478344
56.9	0.295426	0.309155	0.324674	0.372421	0.457735	0.468465	0.412537	0.457735	0.468465
57	0.299303	0.316259	0.318559	0.377152	0.45456	0.469656	0.414561	0.45456	0.469656
57.1	0.2846	0.313354	0.314153	0.364357	0.438375	0.459529	0.415233	0.438375	0.459529
57.2	0.287692	0.303965	0.318836	0.350443	0.44956	0.470068	0.414167	0.44956	0.470068
57.3	0.282321	0.315085	0.315517	0.353781	0.452771	0.46681	0.418076	0.452771	0.46681
57.4	0.273548	0.314335	0.318483	0.356447	0.45999	0.461989	0.406694	0.45999	0.461989
57.5	0.271825	0.311794	0.320806	0.355025	0.457186	0.466725	0.418038	0.457186	0.466725
57.6	0.262946	0.323518	0.323575	0.357484	0.471119	0.477891	0.425124	0.471119	0.477891
57.7	0.257008	0.320493	0.323373	0.340022	0.479267	0.4674	0.417795	0.479267	0.4674
57.8	0.269982	0.320104	0.320734	0.333569	0.459342	0.494123	0.413977	0.459342	0.494123
57.9	0.265717	0.323485	0.336344	0.336563	0.468185	0.479922	0.414055	0.468185	0.479922
58	0.2772	0.313418	0.317553	0.337706	0.47473	0.474832	0.403714	0.47473	0.474832
58.1	0.285759	0.315934	0.31295	0.323911	0.459815	0.471457	0.403209	0.459815	0.471457
58.2	0.29248	0.315597	0.315506	0.330838	0.478122	0.475559	0.403561	0.478122	0.475559
58.3	0.281287	0.311236	0.311478	0.344218	0.464119	0.46154	0.410442	0.464119	0.46154
58.4	0.284543	0.319887	0.320721	0.320352	0.466514	0.460966	0.40124	0.466514	0.460966
58.5	0.285094	0.327979	0.330436	0.320228	0.477505	0.453195	0.400588	0.477505	0.453195
58.6	0.283125	0.320275	0.323465	0.34184	0.490835	0.46887	0.396017	0.490835	0.46887
58.7	0.287262	0.33001	0.321487	0.324089	0.473297	0.466602	0.40614	0.473297	0.466602
58.8	0.278571	0.323894	0.310869	0.327748	0.471911	0.459207	0.398098	0.471911	0.459207
58.9	0.281466	0.333461	0.310729	0.340815	0.480564	0.453374	0.406672	0.480564	0.453374
59	0.288829	0.323244	0.322807	0.332383	0.470678	0.465512	0.39659	0.470678	0.465512
59.1	0.290049	0.322509	0.319112	0.339343	0.476508	0.469928	0.416397	0.476508	0.469928
59.2	0.287647	0.322781	0.320219	0.334695	0.456263	0.472863	0.409499	0.456263	0.472863
59.3	0.292571	0.324209	0.314888	0.332388	0.465176	0.47777	0.414326	0.465176	0.47777
59.4	0.290606	0.31774	0.321311	0.3332	0.480577	0.469112	0.420224	0.480577	0.469112
59.5	0.287324	0.324559	0.335481	0.33372	0.474671	0.464196	0.41635	0.474671	0.464196
59.6	0.289068	0.32918	0.322145	0.336012	0.470274	0.483782	0.391571	0.470274	0.483782
59.7	0.295566	0.328045	0.322541	0.332592	0.482137	0.484656	0.424822	0.482137	0.484656
59.8	0.294589	0.33205	0.341797	0.331823	0.463619	0.477967	0.401093	0.463619	0.477967
59.9	0.286463	0.342071	0.338843	0.334701	0.458008	0.494555	0.401636	0.458008	0.494555
60	0.293884	0.332016	0.325543	0.322741	0.465129	0.4921	0.407188	0.465129	0.4921
60.1	0.289734	0.345365	0.317088	0.335445	0.462697	0.481124	0.414944	0.462697	0.481124
60.2	0.308277	0.338543	0.328002	0.329263	0.477167	0.473672	0.395459	0.477167	0.473672
60.3	0.298208	0.328208	0.319601	0.339707	0.454801	0.474407	0.396304	0.454801	0.474407
60.4	0.300832	0.326416	0.320289	0.335348	0.4583	0.476596	0.399074	0.4583	0.476596
60.5	0.286884	0.346078	0.326723	0.342055	0.447402	0.479359	0.405543	0.447402	0.479359
60.6	0.279122	0.336615	0.33021	0.349971	0.471479	0.472604	0.407291	0.471479	0.472604
60.7	0.278159	0.333393	0.32502	0.337255	0.46788	0.472527	0.402106	0.46788	0.472527
60.8	0.281723	0.32906	0.330037	0.335665	0.469754	0.48433	0.412409	0.469754	0.48433
60.9	0.28951	0.325877	0.32683	0.357733	0.488309	0.487426	0.407789	0.488309	0.487426
61	0.284474	0.339529	0.312123	0.350243	0.480486	0.489762	0.417323	0.480486	0.489762
61.1	0.283884	0.342358	0.315037	0.341247	0.479907	0.475551	0.409277	0.479907	0.475551
61.2	0.27877	0.335855	0.304513	0.341406	0.494389	0.484991	0.403732	0.494389	0.484991
61.3	0.285208	0.334069	0.310702	0.374206	0.493706	0.477506	0.403635	0.493706	0.477506
61.4	0.286218	0.324537	0.319767	0.365786	0.482022	0.490214	0.415988	0.482022	0.490214
61.5	0.288847	0.320357	0.316621	0.349474	0.478769	0.487004	0.420662	0.478769	0.487004
61.6	0.282641	0.322863	0.336593	0.347738	0.466659	0.486896	0.426207	0.466659	0.486896
61.7	0.285845	0.318936	0.345296	0.34798	0.47063	0.47733	0.439763	0.47063	0.47733
61.8	0.288336	0.323097	0.339919	0.338506	0.462836	0.48175	0.414278	0.462836	0.48175
61.9	0.273703	0.334435	0.345087	0.34953	0.484883	0.503311	0.420501	0.484883	0.503311
62	0.273232	0.322853	0.347771	0.354624	0.48324	0.499891	0.429773	0.48324	0.499891
62.1	0.285776	0.327555	0.337961	0.350611	0.46509	0.480878	0.421139	0.46509	0.480878
62.2	0.287149	0.318565	0.346054	0.342772	0.471717	0.495438	0.424996	0.471717	0.495438
62.3	0.283786	0.331468	0.33673	0.361474	0.477409	0.491754	0.415576	0.477409	0.491754
62.4	0.28705	0.330383	0.3333	0.374052	0.492722	0.486044	0.426814	0.492722	0.486044
62.5	0.278634	0.344363	0.346107	0.369206	0.486129	0.50092	0.429592	0.486129	0.50092
62.6	0.278203	0.343001	0.342701	0.373616	0.486625	0.486227	0.432198	0.486625	0.486227
62.7	0.279112	0.329849	0.326141	0.379988	0.495483	0.478917	0.434636	0.495483	0.478917
62.8	0.277521	0.332774	0.317102	0.381767	0.487281	0.484827	0.453214	0.487281	0.484827
62.9	0.278562	0.330592	0.336315	0.362944	0.501982	0.475841	0.439736	0.501982	0.475841
63	0.277858	0.322925	0.33464	0.366368	0.514536	0.473351	0.416712	0.514536	0.473351
63.1	0.281286	0.336796	0.318527	0.353496	0.502364	0.483271	0.431875	0.502364	0.483271
63.2	0.280004	0.336098	0.32471	0.378267	0.479813	0.476676	0.412395	0.479813	0.476676
63.3	0.276213	0.334712	0.329335	0.383325	0.493557	0.471539	0.409713	0.493557	0.471539
63.4	0.284174	0.336566	0.341616	0.375523	0.50537	0.494111	0.432167	0.50537	0.494111
63.5	0.293382	0.336449	0.338077	0.38332	0.483782	0.475268	0.422519	0.483782	0.475268
63.6	0.29194	0.323787	0.323932	0.370417	0.509619	0.470468	0.421287	0.509619	0.470468
63.7	0.298235	0.326055	0.317721	0.383902	0.484607	0.487815	0.434442	0.484607	0.487815
63.8	0.30981	0.31576	0.306934	0.39226	0.492498	0.49924	0.425004	0.492498	0.49924
63.9	0.295481	0.316135	0.317648	0.383651	0.491221	0.488178	0.429753	0.491221	0.488178
64	0.295302	0.31968	0.337472	0.376999	0.503086	0.489889	0.426358	0.503086	0.489889
64.1	0.301154	0.323306	0.334863	0.390786	0.479963	0.480837	0.421965	0.479963	0.480837
64.2	0.293492	0.325384	0.329217	0.395408	0.490217	0.477613	0.415188	0.490217	0.477613
64.3	0.28405	0.326441	0.312024	0.383657	0.489072	0.474018	0.408619	0.489072	0.474018
64.4	0.291339	0.334812	0.323023	0.370877	0.507374	0.477287	0.410227	0.507374	0.477287
64.5	0.289585	0.323146	0.321194	0.378282	0.501484	0.472521	0.409608	0.501484	0.472521
64.6	0.294883	0.32245	0.324687	0.391983	0.482544	0.481017	0.410053	0.482544	0.481017
64.7	0.292685	0.323255	0.323091	0.380175	0.486533	0.478883	0.407593	0.486533	0.478883
64.8	0.294925	0.319976	0.320219	0.370511	0.500968	0.489653	0.415751	0.500968	0.489653
64.9	0.292785	0.32887	0.32584	0.37453	0.487994	0.491765	0.414006	0.487994	0.491765
65	0.29678	0.325199	0.330631	0.387845	0.489594	0.479229	0.412389	0.489594	0.479229
65.1	0.297099	0.32295	0.326628	0.382705	0.486893	0.481357	0.411391	0.486893	0.481357
65.2	0.292432	0.321099	0.322349	0.374615	0.501474	0.477194	0.40701	0.501474	0.477194
65.3	0.283677	0.323968	0.303034	0.398016	0.50422	0.478304	0.420664	0.50422	0.478304
65.4	0.275077	0.322869	0.313272	0.395634	0.497684	0.48155	0.421148	0.497684	0.48155
65.5	0.281719	0.32111	0.308823	0.394017	0.49783	0.480949	0.415459	0.49783	0.480949
65.6	0.273905	0.335186	0.304	0.395817	0.488208	0.484879	0.430141	0.488208	0.484879
65.7	0.275172	0.324495	0.305179	0.407378	0.502183	0.486913	0.426141	0.502183	0.486913
65.8	0.27767	0.321866	0.317159	0.402174	0.494035	0.460374	0.416461	0.494035	0.460374
65.9	0.280942	0.328641	0.310238	0.413516	0.47313	0.481412	0.418089	0.47313	0.481412
66	0.280325	0.324995	0.308804	0.407821	0.501361	0.471989	0.407924	0.501361	0.471989
66.1	0.268722	0.3279	0.308096	0.398109	0.514036	0.460752	0.417759	0.514036	0.460752
66.2	0.278213	0.33402	0.321551	0.388614	0.506379	0.460083	0.418521	0.506379	0.460083
66.3	0.286646	0.326613	0.313437	0.375358	0.495581	0.468427	0.409818	0.495581	0.468427
66.4	0.293462	0.321005	0.309001	0.369149	0.506	0.473245	0.409667	0.506	0.473245
66.5	0.288697	0.330155	0.321871	0.366396	0.503211	0.462064	0.43104	0.503211	0.462064
66.6	0.279655	0.326126	0.321282	0.386721	0.489457	0.490159	0.425856	0.489457	0.490159
66.7	0.283805	0.318033	0.31705	0.388891	0.491702	0.470258	0.432937	0.491702	0.470258
66.8	0.286491	0.327438	0.319718	0.386444	0.499841	0.473151	0.435293	0.499841	0.473151
66.9	0.284829	0.328657	0.305173	0.396306	0.483944	0.466132	0.416546	0.483944	0.466132
67	0.283184	0.325823	0.321552	0.380904	0.492198	0.462748	0.427726	0.492198	0.462748
67.1	0.281156	0.321067	0.323671	0.393964	0.488973	0.460512	0.438387	0.488973	0.460512
67.2	0.29647	0.323154	0.334101	0.38376	0.493095	0.463014	0.424011	0.493095	0.463014
67.3	0.295581	0.321709	0.338983	0.392189	0.492419	0.463009	0.417368	0.492419	0.463009
67.4	0.288552	0.332411	0.329419	0.372301	0.485672	0.455729	0.427341	0.485672	0.455729
67.5	0.276567	0.333333	0.320834	0.359271	0.487382	0.466434	0.422103	0.487382	0.466434
67.6	0.274368	0.330612	0.324096	0.377363	0.505213	0.459696	0.421019	0.505213	0.459696
67.7	0.281125	0.346806	0.330969	0.371121	0.489851	0.460527	0.42848	0.489851	0.460527
67.8	0.28069	0.334552	0.328869	0.368027	0.490909	0.467407	0.431533	0.490909	0.467407
67.9	0.282576	0.325646	0.318651	0.365639	0.501732	0.481307	0.429913	0.501732	0.481307
68	0.284509	0.330623	0.315619	0.388734	0.483086	0.461089	0.424163	0.483086	0.461089
68.1	0.290507	0.334087	0.319211	0.38126	0.499226	0.478042	0.415789	0.499226	0.478042
68.2	0.288476	0.330822	0.31204	0.385224	0.494762	0.468519	0.410872	0.494762	0.468519
68.3	0.285672	0.326404	0.320425	0.378767	0.494385	0.466242	0.418099	0.494385	0.466242
68.4	0.300546	0.326978	0.320024	0.37828	0.49515	0.475303	0.425189	0.49515	0.475303
68.5	0.29396	0.315134	0.327108	0.381017	0.492812	0.472682	0.419203	0.492812	0.472682
68.6	0.304631	0.326022	0.330191	0.378225	0.495717	0.455677	0.402909	0.495717	0.455677
68.7	0.292877	0.326394	0.327768	0.361539	0.49748	0.464721	0.409777	0.49748	0.464721
68.8	0.298501	0.325851	0.324257	0.340021	0.496189	0.467532	0.405625	0.496189	0.467532
68.9	0.29756	0.317546	0.320308	0.341526	0.503872	0.468723	0.413393	0.503872	0.468723
69	0.293215	0.324455	0.331416	0.349364	0.487823	0.468359	0.407695	0.487823	0.468359
69.1	0.291279	0.323602	0.338693	0.331249	0.482267	0.465272	0.407048	0.482267	0.465272
69.2	0.290758	0.324455	0.335522	0.325594	0.496224	0.466977	0.415829	0.496224	0.466977
69.3	0.3086	0.327878	0.3068	0.320047	0.506237	0.460267	0.414774	0.506237	0.460267
69.4	0.307025	0.3253	0.325845	0.322203	0.496532	0.458425	0.414212	0.496532	0.458425
69.5	0.302008	0.326245	0.317724	0.320319	0.521176	0.464181	0.39796	0.521176	0.464181
69.6	0.296969	0.31714	0.327762	0.340405	0.519897	0.46904	0.407593	0.519897	0.46904
69.7	0.292667	0.326667	0.332952	0.373776	0.513166	0.461877	0.40652	0.513166	0.461877
69.8	0.296662	0.330701	0.331356	0.341844	0.505085	0.465537	0.409952	0.505085	0.465537
69.9	0.290426	0.336036	0.323378	0.355021	0.506377	0.475658	0.421111	0.506377	0.475658
70	0.292552	0.342538	0.327574	0.341081	0.507687	0.47951	0.407166	0.507687	0.47951
70.1	0.29011	0.332715	0.324894	0.357351	0.514143	0.474807	0.416842	0.514143	0.474807
70.2	0.277643	0.328739	0.326502	0.351679	0.518714	0.476872	0.409754	0.518714	0.476872
70.3	0.286827	0.332539	0.320188	0.363078	0.515495	0.467576	0.399315	0.515495	0.467576
70.4	0.291802	0.328611	0.332111	0.342621	0.510468	0.474058	0.404411	0.510468	0.474058
70.5	0.284559	0.320434	0.33107	0.36391	0.490093	0.470612	0.408719	0.490093	0.470612
70.6	0.297532	0.319158	0.336642	0.355139	0.488273	0.460301	0.405323	0.488273	0.460301
70.7	0.282674	0.319698	0.333539	0.351126	0.48959	0.462926	0.401969	0.48959	0.462926
70.8	0.277422	0.331932	0.320176	0.345467	0.502326	0.473815	0.405479	0.502326	0.473815
70.9	0.279674	0.320416	0.328695	0.352213	0.501106	0.464665	0.446637	0.501106	0.464665
71	0.276581	0.320873	0.324665	0.351904	0.485417	0.461771	0.436801	0.485417	0.461771
71.1	0.290119	0.328824	0.321179	0.352257	0.484075	0.469894	0.429447	0.484075	0.469894
71.2	0.286181	0.323404	0.336991	0.32789	0.505127	0.471011	0.426677	0.505127	0.471011
71.3	0.2888	0.321849	0.323225	0.332977	0.506912	0.47233	0.422403	0.506912	0.47233
71.4	0.294374	0.324049	0.328401	0.343242	0.488476	0.472192	0.422556	0.488476	0.472192
71.5	0.288346	0.332211	0.338485	0.351896	0.488802	0.467458	0.42486	0.488802	0.467458
71.6	0.292839	0.325642	0.317006	0.341712	0.498625	0.470556	0.431028	0.498625	0.470556
71.7	0.295569	0.320225	0.332178	0.339703	0.498256	0.469483	0.426843	0.498256	0.469483
71.8	0.292692	0.323728	0.320643	0.328632	0.509318	0.492872	0.434021	0.509318	0.492872
71.9	0.278796	0.318583	0.320232	0.326676	0.51453	0.482715	0.434267	0.51453	0.482715
72	0.280335	0.330071	0.333561	0.340375	0.517347	0.471723	0.430638	0.517347	0.471723
72.1	0.283309	0.325273	0.337348	0.333258	0.50066	0.474812	0.431368	0.50066	0.474812
72.2	0.291322	0.330668	0.320644	0.324368	0.507273	0.480562	0.434035	0.507273	0.480562
72.3	0.280744	0.329097	0.320821	0.326026	0.500862	0.483712	0.423972	0.500862	0.483712
72.4	0.285253	0.31563	0.324736	0.335612	0.511684	0.473019	0.42854	0.511684	0.473019
72.5	0.293798	0.3279	0.328001	0.330688	0.520179	0.475169	0.422432	0.520179	0.475169
72.6	0.292178	0.311338	0.328134	0.347855	0.525254	0.472484	0.445617	0.525254	0.472484
72.7	0.291998	0.321854	0.317441	0.357987	0.516431	0.489566	0.427747	0.516431	0.489566
72.8	0.299758	0.320999	0.31237	0.366094	0.523736	0.481382	0.421331	0.523736	0.481382
72.9	0.296521	0.321427	0.326693	0.377013	0.525162	0.461353	0.435528	0.525162	0.461353
73	0.297913	0.326093	0.324836	0.388632	0.525135	0.473804	0.424794	0.525135	0.473804
73.1	0.29025	0.339197	0.316269	0.364436	0.524699	0.492879	0.42549	0.524699	0.492879
73.2	0.288027	0.333408	0.322306	0.369307	0.511744	0.466975	0.426519	0.511744	0.466975
73.3	0.294195	0.330496	0.323939	0.357731	0.516742	0.476899	0.431112	0.516742	0.476899
73.4	0.293238	0.343551	0.319806	0.362158	0.497836	0.471703	0.413861	0.497836	0.471703
73.5	0.292567	0.331151	0.325585	0.351367	0.499839	0.478096	0.432456	0.499839	0.478096
73.6	0.303341	0.334107	0.334012	0.379243	0.502195	0.461209	0.430504	0.502195	0.461209
73.7	0.304395	0.327433	0.322765	0.378563	0.514552	0.482185	0.450055	0.514552	0.482185
73.8	0.316416	0.321211	0.318767	0.361904	0.496711	0.49373	0.436862	0.496711	0.49373
73.9	0.319246	0.322068	0.318186	0.367407	0.517964	0.482644	0.432874	0.517964	0.482644
74	0.309258	0.327926	0.319876	0.364225	0.487481	0.477561	0.41984	0.487481	0.477561
74.1	0.305484	0.333138	0.32006	0.361465	0.510865	0.477646	0.435006	0.510865	0.477646
74.2	0.289494	0.340198	0.329422	0.373794	0.484673	0.483331	0.428217	0.484673	0.483331
74.3	0.294714	0.325418	0.329952	0.365542	0.500622	0.481845	0.442062	0.500622	0.481845
74.4	0.297639	0.325342	0.321504	0.379186	0.520093	0.486569	0.437636	0.520093	0.486569
74.5	0.29852	0.326683	0.319116	0.376984	0.517284	0.483501	0.439826	0.517284	0.483501
74.6	0.302699	0.317429	0.313397	0.388269	0.524932	0.472587	0.426098	0.524932	0.472587
74.7	0.297623	0.324764	0.308005	0.36692	0.520224	0.469898	0.430344	0.520224	0.469898
74.8	0.297092	0.330186	0.31695	0.359321	0.499592	0.481757	0.423639	0.499592	0.481757
74.9	0.310086	0.328512	0.318907	0.37008	0.511872	0.482344	0.4223	0.511872	0.482344
75	0.296358	0.334513	0.312044	0.368016	0.505906	0.468622	0.417456	0.505906	0.468622
75.1	0.304671	0.332128	0.319409	0.36366	0.513704	0.488096	0.420727	0.513704	0.488096
75.2	0.296151	0.344565	0.311433	0.399206	0.513549	0.479181	0.411525	0.513549	0.479181
75.3	0.290167	0.336446	0.311991	0.409393	0.5226	0.486255	0.432146	0.5226	0.486255
75.4	0.285502	0.341758	0.310608	0.370892	0.508977	0.476398	0.431852	0.508977	0.476398
75.5	0.284697	0.332098	0.308078	0.361484	0.51552	0.485682	0.422978	0.51552	0.485682
75.6	0.279118	0.331843	0.312653	0.405918	0.506076	0.484102	0.414743	0.506076	0.484102
75.7	0.287736	0.333501	0.306572	0.401452	0.499879	0.489735	0.41855	0.499879	0.489735
75.8	0.283793	0.336724	0.312792	0.40357	0.502336	0.484848	0.423317	0.502336	0.484848
75.9	0.29238	0.349423	0.311394	0.409353	0.496187	0.481529	0.42497	0.496187	0.481529
76	0.29011	0.33959	0.322718	0.419558	0.509953	0.483125	0.419532	0.509953	0.483125
76.1	0.281975	0.332615	0.322665	0.410809	0.502365	0.474038	0.409232	0.502365	0.474038
76.2	0.286986	0.346071	0.319375	0.396759	0.503769	0.471829	0.431436	0.503769	0.471829
76.3	0.282777	0.345207	0.321916	0.375725	0.511391	0.47023	0.42622	0.511391	0.47023
76.4	0.276202	0.339512	0.326696	0.388968	0.512864	0.462512	0.440736	0.512864	0.462512
76.5	0.282209	0.338867	0.317553	0.38438	0.51356	0.456864	0.440129	0.51356	0.456864
76.6	0.273384	0.33389	0.316386	0.380132	0.514994	0.466566	0.43917	0.514994	0.466566
76.7	0.280508	0.339277	0.327706	0.36774	0.516527	0.462987	0.431945	0.516527	0.462987
76.8	0.279161	0.338469	0.317009	0.370518	0.497148	0.474179	0.449467	0.497148	0.474179
76.9	0.283973	0.344069	0.316082	0.382063	0.52207	0.474792	0.423401	0.52207	0.474792
77	0.28438	0.337048	0.328898	0.372298	0.519861	0.468273	0.431185	0.519861	0.468273
77.1	0.28527	0.335788	0.321584	0.356551	0.528697	0.469606	0.428028	0.528697	0.469606
77.2	0.287053	0.342235	0.309211	0.368013	0.498644	0.472046	0.427007	0.498644	0.472046
77.3	0.286647	0.34487	0.322318	0.393782	0.504157	0.483078	0.444297	0.504157	0.483078
77.4	0.271188	0.342618	0.316855	0.401814	0.516206	0.497316	0.434807	0.516206	0.497316
77.5	0.277685	0.342709	0.315652	0.400323	0.511052	0.472936	0.451633	0.511052	0.472936
77.6	0.281027	0.340929	0.316317	0.381209	0.510612	0.478264	0.435192	0.510612	0.478264
77.7	0.289753	0.341035	0.310998	0.40056	0.490878	0.478505	0.43969	0.490878	0.478505
77.8	0.298513	0.347889	0.319	0.401246	0.502085	0.482003	0.43129	0.502085	0.482003
77.9	0.286681	0.337403	0.306517	0.393728	0.505949	0.478567	0.433416	0.505949	0.478567
78	0.29613	0.352453	0.316454	0.391795	0.500362	0.479499	0.432149	0.500362	0.479499
78.1	0.297014	0.350162	0.310879	0.384997	0.512381	0.485197	0.429499	0.512381	0.485197
78.2	0.299559	0.346063	0.315989	0.358566	0.546043	0.502033	0.433914	0.546043	0.502033
78.3	0.309998	0.344198	0.309707	0.36528	0.539459	0.490455	0.428333	0.539459	0.490455
78.4	0.301604	0.341058	0.311617	0.353295	0.511003	0.493139	0.431515	0.511003	0.493139
78.5	0.303858	0.337761	0.305999	0.376985	0.509811	0.475086	0.436158	0.509811	0.475086
78.6	0.29883	0.33877	0.306009	0.375598	0.507199	0.494654	0.432534	0.507199	0.494654
78.7	0.292546	0.338726	0.296623	0.379274	0.508281	0.489996	0.443232	0.508281	0.489996
78.8	0.296661	0.333871	0.308306	0.381493	0.487223	0.487582	0.440769	0.487223	0.487582
78.9	0.295345	0.343985	0.314108	0.38276	0.510209	0.49047	0.44574	0.510209	0.49047
79	0.291928	0.345408	0.318021	0.364816	0.48759	0.505582	0.437527	0.48759	0.505582
79.1	0.296598	0.342727	0.327178	0.371313	0.518345	0.498039	0.445508	0.518345	0.498039
79.2	0.310713	0.331484	0.315329	0.382318	0.509691	0.496298	0.428473	0.509691	0.496298
79.3	0.291016	0.332826	0.31598	0.383912	0.506482	0.498115	0.442882	0.506482	0.498115
79.4	0.305012	0.339682	0.314557	0.382131	0.51813	0.484917	0.428929	0.51813	0.484917
79.5	0.30208	0.340839	0.318263	0.390324	0.502745	0.494913	0.428323	0.502745	0.494913
79.6	0.30028	0.337841	0.323624	0.376397	0.507029	0.47768	0.433262	0.507029	0.47768
79.7	0.304827	0.344589	0.312604	0.39386	0.51684	0.474836	0.430352	0.51684	0.474836
79.8	0.308649	0.335938	0.315667	0.406798	0.522392	0.480016	0.448856	0.522392	0.480016
79.9	0.30547	0.335973	0.316081	0.394435	0.513975	0.482592	0.452335	0.513975	0.482592
80	0.307785	0.344253	0.325834	0.378619	0.516293	0.488911	0.427456	0.516293	0.488911
80.1	0.309047	0.343461	0.323885	0.371449	0.516774	0.464584	0.447302	0.516774	0.464584
80.2	0.305348	0.354624	0.313771	0.347151	0.501677	0.481749	0.439454	0.501677	0.481749
80.3	0.294984	0.341066	0.319915	0.37917	0.498167	0.475673	0.434127	0.498167	0.475673
80.4	0.293338	0.350625	0.313237	0.375224	0.510322	0.460432	0.438505	0.510322	0.460432
80.5	0.294153	0.356626	0.314991	0.393213	0.54663	0.48117	0.438916	0.54663	0.48117
80.6	0.299941	0.342264	0.309142	0.39398	0.530168	0.487942	0.434468	0.530168	0.487942
80.7	0.306145	0.345815	0.317452	0.381562	0.535653	0.471228	0.433989	0.535653	0.471228
80.8	0.286619	0.364602	0.319297	0.379279	0.521027	0.475785	0.445269	0.521027	0.475785
80.9	0.285203	0.344517	0.304053	0.393161	0.530804	0.473308	0.432208	0.530804	0.473308
81	0.297959	0.336638	0.313511	0.391574	0.515237	0.477436	0.450164	0.515237	0.477436
81.1	0.282137	0.340251	0.303888	0.370227	0.526525	0.477771	0.444833	0.526525	0.477771
81.2	0.292653	0.336197	0.31024	0.383816	0.527767	0.476996	0.451097	0.527767	0.476996
81.3	0.288092	0.339161	0.305127	0.369059	0.503378	0.480125	0.438689	0.503378	0.480125
81.4	0.28216	0.329118	0.310228	0.382888	0.486633	0.478808	0.447644	0.486633	0.478808
81.5	0.287175	0.331694	0.312199	0.389813	0.504904	0.498424	0.432356	0.504904	0.498424
81.6	0.296345	0.327684	0.315677	0.393798	0.502971	0.4909	0.42005	0.502971	0.4909
81.7	0.289694	0.326839	0.314769	0.369568	0.523593	0.469146	0.43525	0.523593	0.469146
81.8	0.29164	0.319956	0.321969	0.373242	0.518708	0.48507	0.432612	0.518708	0.48507
81.9	0.296496	0.329235	0.303781	0.386035	0.51493	0.503725	0.431717	0.51493	0.503725
82	0.300354	0.324374	0.30587	0.379365	0.509795	0.495934	0.431036	0.509795	0.495934
82.1	0.293213	0.330333	0.312012	0.398719	0.510931	0.484689	0.429394	0.510931	0.484689
82.2	0.282731	0.334302	0.311109	0.389746	0.501258	0.485961	0.426763	0.501258	0.485961
82.3	0.285307	0.344286	0.313293	0.409669	0.50408	0.480888	0.426368	0.50408	0.480888
82.4	0.285971	0.335025	0.303212	0.417555	0.494864	0.486013	0.422891	0.494864	0.486013
82.5	0.29466	0.327609	0.330174	0.425966	0.491468	0.471343	0.41965	0.491468	0.471343
82.6	0.301771	0.327382	0.306054	0.414818	0.500423	0.48906	0.413383	0.500423	0.48906
82.7	0.297561	0.326708	0.310602	0.403114	0.514692	0.483647	0.419801	0.514692	0.483647
82.8	0.293025	0.330915	0.317692	0.392489	0.495963	0.476394	0.41774	0.495963	0.476394
82.9	0.298365	0.334251	0.316855	0.407086	0.486831	0.489669	0.436159	0.486831	0.489669
83	0.29368	0.335713	0.321918	0.40809	0.495891	0.497055	0.434252	0.495891	0.497055
83.1	0.289416	0.337104	0.32825	0.414386	0.49464	0.478819	0.4166	0.49464	0.478819
83.2	0.303941	0.335201	0.32073	0.425673	0.505471	0.480415	0.425313	0.505471	0.480415
83.3	0.30918	0.326249	0.312177	0.417031	0.496032	0.48482	0.429104	0.496032	0.48482
83.4	0.290783	0.330382	0.312928	0.405356	0.512188	0.48268	0.42261	0.512188	0.48268
83.5	0.283267	0.329411	0.316731	0.395659	0.494222	0.486828	0.417061	0.494222	0.486828
83.6	0.296431	0.32951	0.322769	0.396692	0.499675	0.479665	0.414708	0.499675	0.479665
83.7	0.288359	0.330047	0.3246	0.388828	0.473311	0.480668	0.4129	0.473311	0.480668
83.8	0.287701	0.331842	0.318154	0.392389	0.518401	0.480364	0.418425	0.518401	0.480364
83.9	0.28551	0.33293	0.317071	0.413047	0.520324	0.471184	0.424123	0.520324	0.471184
84	0.270842	0.339224	0.308818	0.390316	0.504013	0.481737	0.428999	0.504013	0.481737
84.1	0.281994	0.335184	0.326488	0.400741	0.515028	0.489555	0.420897	0.515028	0.489555
84.2	0.285312	0.325171	0.318575	0.387958	0.498353	0.489178	0.410079	0.498353	0.489178
84.3	0.280902	0.334885	0.311094	0.363102	0.504041	0.481442	0.416639	0.504041	0.481442
84.4	0.290808	0.328821	0.311953	0.400688	0.512422	0.489022	0.416133	0.512422	0.489022
84.5	0.300051	0.3304	0.315615	0.381159	0.497225	0.501969	0.428231	0.497225	0.501969
84.6	0.298018	0.3279	0.318414	0.375141	0.483701	0.497549	0.412223	0.483701	0.497549
84.7	0.296774	0.328909	0.308452	0.392688	0.483545	0.489479	0.417888	0.483545	0.489479
84.8	0.309805	0.322854	0.311249	0.403776	0.487571	0.484244	0.402149	0.487571	0.484244
84.9	0.313774	0.323189	0.319649	0.439941	0.484926	0.488185	0.425654	0.484926	0.488185
85	0.305538	0.325051	0.307884	0.42453	0.485382	0.500308	0.414116	0.485382	0.500308
85.1	0.305639	0.333116	0.322634	0.387105	0.48716	0.49366	0.407818	0.48716	0.49366
85.2	0.313085	0.339286	0.314712	0.403395	0.489195	0.490042	0.415077	0.489195	0.490042
85.3	0.298077	0.342347	0.321139	0.392755	0.501442	0.493598	0.411943	0.501442	0.493598
85.4	0.311909	0.335345	0.314092	0.361687	0.497015	0.493534	0.409356	0.497015	0.493534
85.5	0.3056	0.343889	0.309039	0.408421	0.500655	0.494841	0.411174	0.500655	0.494841
85.6	0.298567	0.329831	0.320596	0.404923	0.501835	0.497736	0.411248	0.501835	0.497736
85.7	0.296384	0.327055	0.307934	0.411732	0.48713	0.507195	0.440206	0.48713	0.507195
85.8	0.299548	0.319002	0.308104	0.40681	0.483532	0.497713	0.416694	0.483532	0.497713
85.9	0.292593	0.320683	0.30692	0.398668	0.480792	0.499551	0.435962	0.480792	0.499551
86	0.299501	0.326908	0.300626	0.382781	0.489559	0.490773	0.42574	0.489559	0.490773
86.1	0.296199	0.319991	0.306808	0.360897	0.489347	0.494428	0.412602	0.489347	0.494428
86.2	0.293656	0.326586	0.310826	0.362824	0.496707	0.482854	0.425131	0.496707	0.482854
86.3	0.290579	0.330402	0.298912	0.36525	0.489855	0.499131	0.429908	0.489855	0.499131
86.4	0.28538	0.325611	0.307277	0.365199	0.47684	0.502547	0.386606	0.47684	0.502547
86.5	0.289494	0.326456	0.301185	0.364517	0.487416	0.497552	0.402144	0.487416	0.497552
86.6	0.289931	0.326264	0.310908	0.377507	0.480387	0.474478	0.406305	0.480387	0.474478
86.7	0.294829	0.329288	0.2932	0.388023	0.481382	0.48281	0.418851	0.481382	0.48281
86.8	0.295305	0.314161	0.309662	0.387727	0.47904	0.49192	0.408701	0.47904	0.49192
86.9	0.287945	0.329785	0.30944	0.39229	0.485265	0.497707	0.410459	0.485265	0.497707
87	0.288372	0.315697	0.306929	0.370658	0.481402	0.505026	0.412265	0.481402	0.505026
87.1	0.294482	0.310503	0.303782	0.371595	0.476377	0.49361	0.405412	0.476377	0.49361
87.2	0.284408	0.318305	0.310132	0.370881	0.498261	0.492019	0.413317	0.498261	0.492019
87.3	0.289406	0.326151	0.311669	0.360294	0.487136	0.483531	0.414593	0.487136	0.483531
87.4	0.288003	0.317335	0.304206	0.352579	0.501999	0.500729	0.396365	0.501999	0.500729
87.5	0.282642	0.322289	0.310649	0.369113	0.483734	0.520783	0.396085	0.483734	0.520783
87.6	0.29374	0.320434	0.301169	0.351553	0.478412	0.51659	0.412272	0.478412	0.51659
87.7	0.291926	0.307871	0.308805	0.355563	0.470827	0.491665	0.399743	0.470827	0.491665
87.8	0.290116	0.315074	0.303283	0.36412	0.46903	0.503678	0.393901	0.46903	0.503678
87.9	0.297382	0.312316	0.307859	0.364679	0.483322	0.515355	0.421428	0.483322	0.515355
88	0.30228	0.310889	0.306395	0.36583	0.490488	0.521264	0.409342	0.490488	0.521264
88.1	0.298886	0.313372	0.317224	0.377008	0.472199	0.499498	0.412115	0.472199	0.499498
88.2	0.301961	0.326221	0.313736	0.368065	0.489589	0.511847	0.429312	0.489589	0.511847
88.3	0.309491	0.328511	0.308214	0.364259	0.46187	0.513321	0.420403	0.46187	0.513321
88.4	0.305765	0.318567	0.317157	0.367484	0.469012	0.503344	0.406651	0.469012	0.503344
88.5	0.301531	0.319766	0.316257	0.366155	0.46462	0.497007	0.413388	0.46462	0.497007
88.6	0.299669	0.313842	0.327807	0.362594	0.482345	0.495258	0.417035	0.482345	0.495258
88.7	0.296437	0.314528	0.336469	0.377243	0.47864	0.495613	0.41616	0.47864	0.495613
88.8	0.295935	0.317879	0.326656	0.36944	0.481189	0.496567	0.428392	0.481189	0.496567
88.9	0.293793	0.323512	0.309251	0.376091	0.473145	0.495273	0.419341	0.473145	0.495273
89	0.293521	0.333633	0.320403	0.370132	0.475916	0.493183	0.419437	0.475916	0.493183
89.1	0.288258	0.335124	0.310013	0.385437	0.480623	0.485066	0.436903	0.480623	0.485066
89.2	0.286083	0.343622	0.311119	0.36903	0.481485	0.488825	0.418739	0.481485	0.488825
89.3	0.291607	0.33007	0.309388	0.38292	0.473897	0.505574	0.411496	0.473897	0.505574
89.4	0.285129	0.331814	0.301023	0.364205	0.486227	0.488754	0.4135	0.486227	0.488754
89.5	0.289918	0.33565	0.310873	0.367972	0.472979	0.482404	0.398396	0.472979	0.482404
89.6	0.291674	0.331997	0.317111	0.381357	0.490638	0.488311	0.414235	0.490638	0.488311
89.7	0.276291	0.331363	0.303705	0.389454	0.489065	0.481905	0.411389	0.489065	0.481905
89.8	0.280781	0.328529	0.309461	0.389476	0.514316	0.469054	0.426338	0.514316	0.469054
89.9	0.277943	0.333896	0.310086	0.379918	0.489206	0.464932	0.43033	0.489206	0.464932
90	0.282789	0.338408	0.31418	0.384232	0.486533	0.488211	0.409258	0.486533	0.488211
90.1	0.278862	0.34094	0.321093	0.391591	0.474547	0.488329	0.41339	0.474547	0.488329
90.2	0.285917	0.331566	0.320757	0.40412	0.464578	0.487027	0.432629	0.464578	0.487027
90.3	0.283088	0.331875	0.322218	0.401171	0.478566	0.468813	0.423767	0.478566	0.468813
90.4	0.28203	0.336824	0.328009	0.403903	0.490018	0.486341	0.436347	0.490018	0.486341
90.5	0.282399	0.330733	0.331044	0.388572	0.485125	0.501406	0.425242	0.485125	0.501406
90.6	0.283788	0.323287	0.333338	0.371358	0.493555	0.49626	0.42129	0.493555	0.49626
90.7	0.272841	0.324208	0.32719	0.399365	0.497597	0.495585	0.409536	0.497597	0.495585
90.8	0.286032	0.3361	0.328591	0.390194	0.509916	0.493955	0.428543	0.509916	0.493955
90.9	0.285566	0.341357	0.321567	0.377379	0.496232	0.506156	0.42685	0.496232	0.506156
91	0.291558	0.339864	0.32467	0.367202	0.50804	0.487452	0.42771	0.50804	0.487452
91.1	0.279647	0.340334	0.323501	0.382146	0.525831	0.486599	0.438213	0.525831	0.486599
91.2	0.276592	0.339551	0.322532	0.369339	0.51552	0.500913	0.420606	0.51552	0.500913
91.3	0.277144	0.339319	0.317712	0.379982	0.50216	0.500006	0.434894	0.50216	0.500006
91.4	0.28015	0.34919	0.327118	0.402813	0.50684	0.474615	0.43674	0.50684	0.474615
91.5	0.287456	0.338105	0.321793	0.391574	0.50233	0.476613	0.435485	0.50233	0.476613
91.6	0.286622	0.346719	0.322661	0.390805	0.513753	0.47561	0.428969	0.513753	0.47561
91.7	0.28223	0.353393	0.321018	0.382223	0.534644	0.492368	0.424418	0.534644	0.492368
91.8	0.28839	0.338815	0.315823	0.381237	0.503067	0.489341	0.436943	0.503067	0.489341
91.9	0.280929	0.351215	0.315541	0.393178	0.511585	0.491339	0.434973	0.511585	0.491339
92	0.280718	0.353404	0.320631	0.38968	0.519287	0.476883	0.437528	0.519287	0.476883
92.1	0.288513	0.339009	0.331593	0.380351	0.489478	0.480897	0.422678	0.489478	0.480897
92.2	0.289041	0.347709	0.328093	0.397801	0.505226	0.487525	0.431847	0.505226	0.487525
92.3	0.290063	0.337216	0.318479	0.383249	0.519097	0.478259	0.427557	0.519097	0.478259
92.4	0.293892	0.33989	0.345227	0.370192	0.525743	0.491484	0.420624	0.525743	0.491484
92.5	0.305111	0.333881	0.322677	0.348159	0.501544	0.472473	0.436195	0.501544	0.472473
92.6	0.313484	0.330758	0.319242	0.363567	0.514607	0.490114	0.416014	0.514607	0.490114
92.7	0.304731	0.326185	0.317742	0.379689	0.515995	0.489974	0.422189	0.515995	0.489974
92.8	0.309184	0.334683	0.322056	0.366323	0.518785	0.478165	0.421208	0.518785	0.478165
92.9	0.311486	0.338309	0.323759	0.34685	0.518114	0.493622	0.423509	0.518114	0.493622
93	0.302733	0.353745	0.318858	0.349985	0.496976	0.49413	0.431624	0.496976	0.49413
93.1	0.307871	0.341757	0.333058	0.354649	0.493123	0.494734	0.426088	0.493123	0.494734
93.2	0.309568	0.338758	0.320392	0.360906	0.496991	0.500209	0.42045	0.496991	0.500209
93.3	0.314314	0.340834	0.328301	0.355033	0.510502	0.495889	0.423718	0.510502	0.495889
93.4	0.310008	0.340152	0.324178	0.342981	0.508166	0.503065	0.426699	0.508166	0.503065
93.5	0.305822	0.335184	0.322715	0.348477	0.518949	0.51459	0.42019	0.518949	0.51459
93.6	0.311974	0.348286	0.322168	0.364065	0.509978	0.501483	0.41136	0.509978	0.501483
93.7	0.300106	0.344365	0.328197	0.356086	0.503252	0.498567	0.421024	0.503252	0.498567
93.8	0.308188	0.362679	0.325674	0.362884	0.522443	0.510449	0.438856	0.522443	0.510449
93.9	0.29967	0.352819	0.32257	0.358461	0.523099	0.492906	0.445535	0.523099	0.492906
94	0.314857	0.347492	0.32442	0.374733	0.534846	0.497733	0.415332	0.534846	0.497733
94.1	0.302229	0.347593	0.314232	0.355436	0.532468	0.505259	0.421042	0.532468	0.505259
94.2	0.303436	0.347401	0.319711	0.355533	0.529975	0.517786	0.425958	0.529975	0.517786
94.3	0.295033	0.344008	0.329728	0.353792	0.53908	0.501191	0.428968	0.53908	0.501191
94.4	0.283839	0.358805	0.327966	0.368728	0.53533	0.506702	0.426146	0.53533	0.506702
94.5	0.291642	0.341174	0.311442	0.369052	0.552011	0.505811	0.41685	0.552011	0.505811
94.6	0.287396	0.359873	0.307416	0.34958	0.547947	0.513964	0.421397	0.547947	0.513964
94.7	0.295022	0.352369	0.314872	0.363942	0.543131	0.497826	0.413718	0.543131	0.497826
94.8	0.290354	0.352558	0.31858	0.361159	0.536378	0.507744	0.418832	0.536378	0.507744
94.9	0.296424	0.361859	0.319309	0.376611	0.540405	0.499118	0.415864	0.540405	0.499118
95	0.296003	0.343393	0.316385	0.367603	0.518498	0.499709	0.414926	0.518498	0.499709
95.1	0.304512	0.350411	0.319844	0.358063	0.543607	0.505147	0.412458	0.543607	0.505147
95.2	0.28886	0.35044	0.318178	0.362837	0.530374	0.507954	0.41968	0.530374	0.507954
95.3	0.294675	0.342908	0.318437	0.352328	0.531973	0.512594	0.417603	0.531973	0.512594
95.4	0.291784	0.348128	0.320498	0.350261	0.541547	0.517818	0.413328	0.541547	0.517818
95.5	0.301495	0.347807	0.319574	0.379221	0.538619	0.507631	0.402149	0.538619	0.507631
95.6	0.290069	0.34202	0.319996	0.36963	0.53998	0.504142	0.411218	0.53998	0.504142
95.7	0.288015	0.343692	0.316626	0.371835	0.542708	0.500527	0.417357	0.542708	0.500527
95.8	0.292385	0.349943	0.320441	0.360725	0.548286	0.514475	0.419369	0.548286	0.514475
95.9	0.289686	0.358808	0.314311	0.350987	0.530664	0.497105	0.421602	0.530664	0.497105
96	0.289657	0.355173	0.32011	0.362626	0.562547	0.505113	0.426093	0.562547	0.505113
96.1	0.288323	0.3439	0.331445	0.364457	0.559554	0.495743	0.428457	0.559554	0.495743
96.2	0.289157	0.345336	0.323193	0.374614	0.577602	0.491611	0.41457	0.577602	0.491611
96.3	0.288753	0.334344	0.322613	0.356437	0.559834	0.504857	0.430378	0.559834	0.504857
96.4	0.28878	0.343181	0.31514	0.353401	0.551335	0.518212	0.42732	0.551335	0.518212
96.5	0.282788	0.331735	0.317708	0.339494	0.557387	0.529251	0.436245	0.557387	0.529251
96.6	0.286437	0.339158	0.319226	0.349508	0.548479	0.53046	0.430165	0.548479	0.53046
96.7	0.298937	0.346887	0.314769	0.35431	0.531894	0.526008	0.413013	0.531894	0.526008
96.8	0.282638	0.336067	0.315114	0.359635	0.550265	0.516911	0.439026	0.550265	0.516911
96.9	0.295451	0.339565	0.305607	0.360653	0.539214	0.504449	0.424229	0.539214	0.504449
97	0.293525	0.347635	0.314978	0.357442	0.520514	0.511059	0.431688	0.520514	0.511059
97.1	0.298402	0.350843	0.318136	0.346698	0.524892	0.511528	0.428601	0.524892	0.511528
97.2	0.289482	0.336509	0.323298	0.344423	0.520658	0.518304	0.418587	0.520658	0.518304
97.3	0.296245	0.3235	0.32371	0.355039	0.521291	0.50326	0.428623	0.521291	0.50326
97.4	0.288154	0.326103	0.337148	0.354525	0.531271	0.485834	0.423599	0.531271	0.485834
97.5	0.290824	0.330988	0.319172	0.36855	0.522779	0.5026	0.416155	0.522779	0.5026
97.6	0.278548	0.338839	0.324504	0.366856	0.512919	0.512542	0.409975	0.512919	0.512542
97.7	0.295321	0.333924	0.320473	0.38284	0.508249	0.49817	0.427349	0.508249	0.49817
97.8	0.292689	0.337675	0.315345	0.3816	0.508642	0.48881	0.430917	0.508642	0.48881
97.9	0.295981	0.343549	0.31762	0.400226	0.510782	0.482371	0.433673	0.510782	0.482371
98	0.298072	0.331323	0.308572	0.357108	0.499275	0.49851	0.432419	0.499275	0.49851
98.1	0.296596	0.335288	0.312597	0.387487	0.517276	0.496925	0.425546	0.517276	0.496925
98.2	0.305354	0.335256	0.310663	0.382468	0.516713	0.506568	0.42053	0.516713	0.506568
98.3	0.307115	0.325439	0.314244	0.369439	0.52594	0.504492	0.429598	0.52594	0.504492
98.4	0.298283	0.327423	0.329009	0.370493	0.522318	0.523764	0.434	0.522318	0.523764
98.5	0.299743	0.32597	0.325544	0.357244	0.520063	0.496467	0.429958	0.520063	0.496467
98.6	0.296215	0.319925	0.331743	0.35823	0.505411	0.500322	0.42177	0.505411	0.500322
98.7	0.297489	0.33634	0.331778	0.343666	0.521744	0.495253	0.424515	0.521744	0.495253
98.8	0.302247	0.325419	0.324352	0.355361	0.528425	0.488697	0.41565	0.528425	0.488697
98.9	0.300201	0.326891	0.325862	0.342641	0.534664	0.499741	0.410989	0.534664	0.499741
99	0.305875	0.325953	0.34322	0.33734	0.543466	0.501789	0.41107	0.543466	0.501789
99.1	0.301249	0.322253	0.347377	0.344819	0.524773	0.504621	0.40573	0.524773	0.504621
99.2	0.296993	0.328055	0.331049	0.352525	0.54449	0.503656	0.403824	0.54449	0.503656
99.3	0.293802	0.335863	0.337532	0.36592	0.52712	0.508701	0.415478	0.52712	0.508701
99.4	0.293125	0.324655	0.345316	0.373184	0.523461	0.514412	0.424426	0.523461	0.514412
99.5	0.289334	0.336589	0.361656	0.380437	0.51949	0.503914	0.408336	0.51949	0.503914
99.6	0.295488	0.327314	0.360973	0.379956	0.516452	0.494801	0.425392	0.516452	0.494801
99.7	0.2991	0.325317	0.34891	0.367234	0.52784	0.499112	0.43012	0.52784	0.499112
99.8	0.310403	0.33027	0.362822	0.375128	0.557133	0.502255	0.433825	0.557133	0.502255
99.9	0.304346	0.332234	0.348703	0.367488	0.528837	0.515538	0.433032	0.528837	0.515538
100	0.299787	0.335495	0.348217	0.372399	0.55283	0.50081	0.428774	0.55283	0.50081
100.1	0.304182	0.332886	0.339149	0.367458	0.549749	0.508183	0.427968	0.549749	0.508183
100.2	0.306837	0.332901	0.332953	0.355479	0.523042	0.494087	0.414642	0.523042	0.494087
100.3	0.309145	0.323017	0.321622	0.358753	0.505539	0.485908	0.425813	0.505539	0.485908
100.4	0.296751	0.330965	0.324244	0.34803	0.530264	0.501559	0.432567	0.530264	0.501559
100.5	0.300973	0.316315	0.345893	0.37204	0.516616	0.489129	0.41614	0.516616	0.489129
100.6	0.289762	0.322305	0.34251	0.369261	0.518447	0.501711	0.436381	0.518447	0.501711
100.7	0.292245	0.326475	0.342089	0.363782	0.533875	0.505871	0.4357	0.533875	0.505871
100.8	0.29734	0.332611	0.345183	0.360605	0.545417	0.505765	0.430932	0.545417	0.505765
100.9	0.302439	0.340353	0.340817	0.352033	0.544177	0.506438	0.423491	0.544177	0.506438
101	0.298362	0.33799	0.342919	0.363352	0.54433	0.505015	0.425499	0.54433	0.505015
101.1	0.31032	0.327186	0.334641	0.353707	0.546321	0.533878	0.43106	0.546321	0.533878
101.2	0.312026	0.321757	0.328696	0.351498	0.529006	0.521282	0.426219	0.529006	0.521282
101.3	0.30195	0.325017	0.343971	0.345371	0.517877	0.514793	0.419019	0.517877	0.514793
101.4	0.306206	0.336165	0.334501	0.353041	0.554362	0.50777	0.410588	0.554362	0.50777
101.5	0.308611	0.332294	0.327595	0.358824	0.548435	0.508906	0.415782	0.548435	0.508906
101.6	0.29449	0.34572	0.32944	0.35028	0.526261	0.522313	0.418082	0.526261	0.522313
101.7	0.299595	0.333052	0.346173	0.351359	0.552825	0.51055	0.428533	0.552825	0.51055
101.8	0.307025	0.335641	0.342661	0.350498	0.531696	0.505686	0.447202	0.531696	0.505686
101.9	0.302852	0.334955	0.355738	0.359882	0.557152	0.509225	0.441714	0.557152	0.509225
102	0.312788	0.333889	0.335627	0.34933	0.530192	0.503116	0.419207	0.530192	0.503116
102.1	0.303116	0.333328	0.332278	0.346202	0.547717	0.502768	0.41886	0.547717	0.502768
102.2	0.303749	0.335233	0.337608	0.352383	0.559625	0.513587	0.425889	0.559625	0.513587
102.3	0.307964	0.338973	0.3259	0.340693	0.54432	0.50879	0.429786	0.54432	0.50879
102.4	0.307375	0.342946	0.321064	0.341014	0.537788	0.493897	0.449081	0.537788	0.493897
102.5	0.303373	0.34953	0.329406	0.358895	0.530024	0.490882	0.444869	0.530024	0.490882
102.6	0.314473	0.348466	0.326587	0.368076	0.526142	0.503771	0.432904	0.526142	0.503771
102.7	0.308974	0.335712	0.313911	0.372017	0.526901	0.502581	0.438863	0.526901	0.502581
102.8	0.303689	0.338288	0.309662	0.363007	0.52974	0.503476	0.43462	0.52974	0.503476
102.9	0.297048	0.33423	0.30779	0.361152	0.529368	0.507519	0.435424	0.529368	0.507519
103	0.296818	0.330812	0.318456	0.355973	0.539833	0.487943	0.436516	0.539833	0.487943
103.1	0.299084	0.331786	0.320047	0.364024	0.540504	0.504613	0.44116	0.540504	0.504613
103.2	0.309518	0.333254	0.330842	0.358092	0.530633	0.509622	0.439973	0.530633	0.509622
103.3	0.304638	0.335506	0.330618	0.35757	0.535227	0.509119	0.432291	0.535227	0.509119
103.4	0.305755	0.349699	0.32887	0.365522	0.53168	0.512092	0.437474	0.53168	0.512092
103.5	0.296365	0.342631	0.331817	0.340676	0.517548	0.515093	0.421845	0.517548	0.515093
103.6	0.303439	0.341752	0.330041	0.351854	0.556032	0.508384	0.432516	0.556032	0.508384
103.7	0.303723	0.34205	0.336865	0.353146	0.542629	0.491086	0.456269	0.542629	0.491086
103.8	0.320938	0.335628	0.338925	0.371691	0.546753	0.502395	0.444365	0.546753	0.502395
103.9	0.317826	0.338473	0.327852	0.373949	0.539156	0.505567	0.441126	0.539156	0.505567
104	0.316099	0.338924	0.318902	0.365921	0.551202	0.496654	0.431615	0.551202	0.496654
104.1	0.323294	0.316741	0.332417	0.368544	0.529876	0.515755	0.439244	0.529876	0.515755
104.2	0.315695	0.318956	0.321885	0.371394	0.560518	0.490461	0.428719	0.560518	0.490461
104.3	0.309765	0.318022	0.31551	0.382962	0.559338	0.501018	0.432804	0.559338	0.501018
104.4	0.308193	0.32149	0.320834	0.369956	0.543556	0.504787	0.416618	0.543556	0.504787
104.5	0.311088	0.336002	0.315882	0.372934	0.567369	0.490132	0.418831	0.567369	0.490132
104.6	0.307109	0.3298	0.32888	0.352408	0.545952	0.486075	0.427592	0.545952	0.486075
104.7	0.300199	0.336742	0.329672	0.351055	0.546024	0.506076	0.414214	0.546024	0.506076
104.8	0.308096	0.330777	0.33963	0.340083	0.552317	0.512031	0.404623	0.552317	0.512031
104.9	0.30154	0.329919	0.335263	0.342686	0.568803	0.50076	0.410682	0.568803	0.50076
105	0.309163	0.342546	0.335814	0.345597	0.558991	0.485876	0.39961	0.558991	0.485876
105.1	0.308638	0.338965	0.334825	0.346185	0.538407	0.50249	0.40454	0.538407	0.50249
105.2	0.314301	0.33844	0.340984	0.362289	0.529677	0.507844	0.407469	0.529677	0.507844
105.3	0.314428	0.344851	0.342233	0.369297	0.521286	0.50905	0.405141	0.521286	0.50905
105.4	0.301644	0.345313	0.327141	0.357251	0.54531	0.501935	0.416444	0.54531	0.501935
105.5	0.300847	0.342107	0.314917	0.34624	0.538819	0.515156	0.401344	0.538819	0.515156
105.6	0.303469	0.338313	0.325896	0.35973	0.551849	0.502891	0.416141	0.551849	0.502891
105.7	0.320769	0.343375	0.318128	0.341027	0.521184	0.506388	0.414445	0.521184	0.506388
105.8	0.317613	0.341919	0.316727	0.338081	0.530471	0.505944	0.41258	0.530471	0.505944
105.9	0.315387	0.34481	0.327606	0.344588	0.531011	0.500733	0.425743	0.531011	0.500733
106	0.334174	0.327292	0.324286	0.358286	0.539316	0.511209	0.424717	0.539316	0.511209
106.1	0.31813	0.337924	0.334395	0.355424	0.539368	0.509913	0.429111	0.539368	0.509913
106.2	0.315021	0.335111	0.308386	0.348707	0.531118	0.513604	0.434882	0.531118	0.513604
106.3	0.307007	0.34261	0.30936	0.356187	0.521355	0.511575	0.438303	0.521355	0.511575
106.4	0.308233	0.348023	0.322034	0.347888	0.53071	0.512706	0.436994	0.53071	0.512706
106.5	0.309654	0.348034	0.30029	0.358532	0.536043	0.518068	0.423013	0.536043	0.518068
106.6	0.305395	0.340311	0.308829	0.367091	0.537946	0.514287	0.425123	0.537946	0.514287
106.7	0.323615	0.337053	0.31349	0.349219	0.525575	0.504734	0.421637	0.525575	0.504734
106.8	0.315535	0.3451	0.316118	0.369459	0.537856	0.513926	0.433346	0.537856	0.513926
106.9	0.307118	0.351879	0.321782	0.35811	0.518591	0.49944	0.439715	0.518591	0.49944
107	0.30645	0.339156	0.317969	0.364529	0.531068	0.494642	0.437172	0.531068	0.494642
107.1	0.312783	0.345496	0.313793	0.356503	0.536195	0.51144	0.438338	0.536195	0.51144
107.2	0.307416	0.343971	0.325497	0.3596	0.55418	0.515154	0.427473	0.55418	0.515154
107.3	0.307681	0.351871	0.305895	0.372964	0.541313	0.509013	0.42168	0.541313	0.509013
107.4	0.294795	0.341007	0.311825	0.352923	0.552033	0.507347	0.420562	0.552033	0.507347
107.5	0.299057	0.343124	0.310963	0.359071	0.5313	0.511831	0.429285	0.5313	0.511831
107.6	0.299311	0.351231	0.316639	0.36547	0.546711	0.498222	0.426377	0.546711	0.498222
107.7	0.290831	0.359933	0.319198	0.357886	0.534299	0.50119	0.412911	0.534299	0.50119
107.8	0.301523	0.342996	0.320789	0.358793	0.549143	0.49934	0.432292	0.549143	0.49934
107.9	0.298055	0.34419	0.326425	0.364239	0.543741	0.504107	0.429476	0.543741	0.504107
108	0.300464	0.343781	0.326114	0.340388	0.532954	0.50113	0.426709	0.532954	0.50113
108.1	0.30153	0.337495	0.321203	0.337386	0.550351	0.497174	0.431187	0.550351	0.497174
108.2	0.308703	0.341276	0.323801	0.343052	0.54044	0.519168	0.421941	0.54044	0.519168
108.3	0.304639	0.331666	0.336914	0.348938	0.548209	0.501555	0.426468	0.548209	0.501555
108.4	0.310658	0.330378	0.330877	0.334164	0.549146	0.498095	0.437424	0.549146	0.498095
108.5	0.307428	0.337563	0.329943	0.339003	0.554991	0.503467	0.435644	0.554991	0.503467
108.6	0.305907	0.337949	0.340768	0.330498	0.546437	0.501605	0.446935	0.546437	0.501605
108.7	0.306016	0.337108	0.337561	0.327208	0.533488	0.491643	0.432017	0.533488	0.491643
108.8	0.297987	0.353747	0.337669	0.334823	0.535905	0.480941	0.433794	0.535905	0.480941
108.9	0.31415	0.342255	0.326382	0.337091	0.540056	0.495216	0.447788	0.540056	0.495216
109	0.304107	0.346861	0.338708	0.33814	0.530216	0.489206	0.433569	0.530216	0.489206
109.1	0.302436	0.343469	0.332013	0.347709	0.543021	0.498311	0.418569	0.543021	0.498311
109.2	0.304656	0.342357	0.344558	0.347716	0.530581	0.493182	0.41847	0.530581	0.493182
109.3	0.302935	0.346103	0.347197	0.365334	0.549283	0.499812	0.419689	0.549283	0.499812
109.4	0.298973	0.341076	0.357894	0.374843	0.562794	0.508769	0.419932	0.562794	0.508769
109.5	0.293116	0.351085	0.341228	0.353752	0.556561	0.514085	0.421045	0.556561	0.514085
109.6	0.294569	0.347568	0.346039	0.348655	0.546614	0.514885	0.422489	0.546614	0.514885
109.7	0.299359	0.342373	0.342092	0.356934	0.547824	0.515544	0.426045	0.547824	0.515544
109.8	0.30296	0.349727	0.331269	0.357385	0.52738	0.514505	0.422077	0.52738	0.514505
109.9	0.308011	0.358876	0.342768	0.359441	0.533537	0.50342	0.444522	0.533537	0.50342
110	0.301428	0.352166	0.332721	0.347981	0.514896	0.509678	0.437932	0.514896	0.509678
110.1	0.318714	0.361369	0.338045	0.32835	0.524146	0.511654	0.433582	0.524146	0.511654
110.2	0.313244	0.354737	0.352663	0.333666	0.537374	0.506514	0.426476	0.537374	0.506514
110.3	0.298715	0.336408	0.334571	0.342029	0.54309	0.49999	0.441297	0.54309	0.49999
110.4	0.305865	0.3391	0.336311	0.361301	0.526749	0.50464	0.425072	0.526749	0.50464
110.5	0.305466	0.328927	0.32387	0.341222	0.52127	0.507098	0.44022	0.52127	0.507098
110.6	0.295018	0.323549	0.322705	0.350752	0.523883	0.500075	0.418756	0.523883	0.500075
110.7	0.304808	0.331518	0.332859	0.349398	0.528076	0.501616	0.420782	0.528076	0.501616
110.8	0.287263	0.328847	0.324139	0.341038	0.519304	0.497642	0.41972	0.519304	0.497642
110.9	0.305762	0.326955	0.324958	0.35309	0.536782	0.496836	0.41552	0.536782	0.496836
111	0.297866	0.324147	0.313072	0.352689	0.527284	0.501157	0.425054	0.527284	0.501157
111.1	0.296678	0.332474	0.32175	0.361434	0.528418	0.506075	0.418085	0.528418	0.506075
111.2	0.300285	0.335145	0.312972	0.345761	0.520275	0.496949	0.432523	0.520275	0.496949
111.3	0.300783	0.334878	0.313723	0.347778	0.517806	0.500979	0.440897	0.517806	0.500979
111.4	0.293795	0.335167	0.321199	0.356857	0.512366	0.498625	0.427907	0.512366	0.498625
111.5	0.30313	0.31759	0.321531	0.359967	0.505969	0.500311	0.435364	0.505969	0.500311
111.6	0.299323	0.323686	0.318123	0.35756	0.495318	0.509036	0.429984	0.495318	0.509036
111.7	0.301656	0.339832	0.334053	0.357703	0.502811	0.491056	0.439054	0.502811	0.491056
111.8	0.302204	0.342301	0.336582	0.353597	0.519602	0.498723	0.426009	0.519602	0.498723
111.9	0.295492	0.335101	0.342328	0.342875	0.493392	0.506629	0.425036	0.493392	0.506629
112	0.285104	0.330866	0.335423	0.354271	0.513171	0.51233	0.441429	0.513171	0.51233
112.1	0.28146	0.325867	0.331286	0.341671	0.510275	0.501673	0.424299	0.510275	0.501673
112.2	0.291274	0.330435	0.331835	0.357518	0.525424	0.508338	0.436257	0.525424	0.508338
112.3	0.291902	0.328383	0.32645	0.351507	0.53092	0.510335	0.43832	0.53092	0.510335
112.4	0.300127	0.338351	0.330645	0.340054	0.524046	0.497486	0.447356	0.524046	0.497486
112.5	0.312476	0.343008	0.330062	0.335729	0.517006	0.497137	0.42031	0.517006	0.497137
112.6	0.310057	0.340537	0.323193	0.349203	0.514078	0.491133	0.424237	0.514078	0.491133
112.7	0.293486	0.339772	0.333298	0.335942	0.511863	0.509989	0.424966	0.511863	0.509989
112.8	0.298963	0.365936	0.327965	0.348895	0.520834	0.49543	0.437134	0.520834	0.49543
112.9	0.299917	0.356098	0.334799	0.328821	0.520303	0.500547	0.421952	0.520303	0.500547
113	0.304142	0.337235	0.34015	0.350463	0.505046	0.501808	0.403411	0.505046	0.501808
113.1	0.291247	0.347788	0.328717	0.34593	0.540105	0.487561	0.415941	0.540105	0.487561
113.2	0.292334	0.348206	0.331082	0.352167	0.5208	0.4957	0.416642	0.5208	0.4957
113.3	0.30826	0.342692	0.323801	0.352212	0.540988	0.492971	0.437244	0.540988	0.492971
113.4	0.298773	0.350955	0.326176	0.33986	0.533703	0.504826	0.419982	0.533703	0.504826
113.5	0.290608	0.343028	0.325467	0.335998	0.540972	0.493889	0.427381	0.540972	0.493889
113.6	0.299633	0.353398	0.322129	0.346799	0.547852	0.501704	0.425507	0.547852	0.501704
113.7	0.295801	0.340433	0.324099	0.324255	0.550714	0.484395	0.427136	0.550714	0.484395
113.8	0.292832	0.348068	0.326854	0.339462	0.544952	0.494344	0.425415	0.544952	0.494344
113.9	0.30196	0.35107	0.323025	0.347341	0.528422	0.497404	0.453988	0.528422	0.497404
114	0.302412	0.355158	0.327912	0.323688	0.529516	0.497698	0.434097	0.529516	0.497698
114.1	0.297468	0.35681	0.328942	0.321023	0.536738	0.492066	0.438002	0.536738	0.492066
114.2	0.296878	0.357187	0.328953	0.328983	0.529548	0.489099	0.441997	0.529548	0.489099
114.3	0.291631	0.3562	0.329516	0.334176	0.527521	0.494761	0.435559	0.527521	0.494761
114.4	0.288564	0.347205	0.311164	0.361789	0.530143	0.499138	0.438076	0.530143	0.499138
114.5	0.285342	0.35373	0.323118	0.3542	0.513294	0.493186	0.43969	0.513294	0.493186
114.6	0.297781	0.341595	0.320127	0.34897	0.515565	0.495245	0.448351	0.515565	0.495245
114.7	0.302308	0.347243	0.325379	0.337064	0.520063	0.499877	0.434536	0.520063	0.499877
114.8	0.299205	0.354658	0.318672	0.342814	0.526406	0.509356	0.442836	0.526406	0.509356
114.9	0.29814	0.351835	0.32001	0.348987	0.52417	0.51071	0.453824	0.52417	0.51071
115	0.296776	0.35286	0.318679	0.346965	0.516781	0.499439	0.456642	0.516781	0.499439
115.1	0.294479	0.349658	0.316238	0.357117	0.525648	0.521533	0.449706	0.525648	0.521533
115.2	0.295167	0.350285	0.315601	0.355813	0.530113	0.522634	0.454742	0.530113	0.522634
115.3	0.2958	0.345061	0.322927	0.363768	0.529535	0.500763	0.455372	0.529535	0.500763
115.4	0.287604	0.3506	0.325673	0.368351	0.538781	0.504887	0.444411	0.538781	0.504887
115.5	0.292337	0.349301	0.319094	0.368502	0.548194	0.494142	0.44546	0.548194	0.494142
115.6	0.281714	0.342984	0.321772	0.382552	0.536172	0.493677	0.443069	0.536172	0.493677
115.7	0.288732	0.349756	0.318389	0.383707	0.535124	0.492661	0.429756	0.535124	0.492661
115.8	0.294725	0.331607	0.322057	0.371671	0.547411	0.494393	0.448808	0.547411	0.494393
115.9	0.277228	0.328777	0.3099	0.373289	0.53146	0.496948	0.445281	0.53146	0.496948
116	0.277772	0.334619	0.318657	0.364541	0.54768	0.499716	0.449325	0.54768	0.499716
116.1	0.272464	0.343043	0.315322	0.360925	0.546976	0.494362	0.460018	0.546976	0.494362
116.2	0.286699	0.335073	0.315048	0.361072	0.553959	0.500976	0.455205	0.553959	0.500976
116.3	0.28726	0.341235	0.324036	0.35603	0.559044	0.514184	0.4583	0.559044	0.514184
116.4	0.283167	0.337981	0.326283	0.33593	0.54107	0.505938	0.436993	0.54107	0.505938
116.5	0.294085	0.336933	0.316883	0.344013	0.567146	0.497347	0.45764	0.567146	0.497347
116.6	0.293004	0.332228	0.320691	0.338502	0.55837	0.497769	0.449158	0.55837	0.497769
116.7	0.291768	0.346061	0.316953	0.339348	0.564097	0.490702	0.450351	0.564097	0.490702
116.8	0.288986	0.353131	0.310632	0.348019	0.560008	0.499118	0.444646	0.560008	0.499118
116.9	0.282693	0.346768	0.321078	0.3562	0.574848	0.506821	0.445095	0.574848	0.506821
117	0.28614	0.333267	0.316903	0.365832	0.581535	0.497389	0.43746	0.581535	0.497389
117.1	0.275559	0.342852	0.324352	0.344299	0.574136	0.488829	0.43601	0.574136	0.488829
117.2	0.279534	0.339601	0.33006	0.338324	0.564667	0.489185	0.458352	0.564667	0.489185
117.3	0.288596	0.344285	0.32664	0.353609	0.573231	0.492709	0.444893	0.573231	0.492709
117.4	0.291952	0.332968	0.323162	0.355424	0.585696	0.490703	0.441527	0.585696	0.490703
117.5	0.296457	0.337953	0.331903	0.352318	0.570998	0.490843	0.437636	0.570998	0.490843
117.6	0.30227	0.344513	0.323408	0.351134	0.571182	0.498219	0.458809	0.571182	0.498219
117.7	0.315212	0.335387	0.319875	0.355538	0.569539	0.494843	0.457923	0.569539	0.494843
117.8	0.300351	0.331466	0.319821	0.36366	0.580628	0.496393	0.44405	0.580628	0.496393
117.9	0.29439	0.330981	0.320366	0.353693	0.568255	0.48895	0.461768	0.568255	0.48895
118	0.294991	0.333217	0.308609	0.359566	0.560567	0.507999	0.460902	0.560567	0.507999
118.1	0.293627	0.332584	0.322193	0.357622	0.563034	0.486614	0.439535	0.563034	0.486614
118.2	0.299532	0.338532	0.317852	0.357044	0.555295	0.50046	0.447284	0.555295	0.50046
118.3	0.303624	0.332871	0.309778	0.348342	0.571695	0.50793	0.443585	0.571695	0.50793
118.4	0.299549	0.338323	0.309708	0.351593	0.573882	0.488388	0.439715	0.573882	0.488388
118.5	0.298231	0.338377	0.312361	0.351822	0.579054	0.494399	0.442864	0.579054	0.494399
118.6	0.292682	0.350552	0.330521	0.359071	0.586902	0.493266	0.458946	0.586902	0.493266
118.7	0.296488	0.34435	0.310851	0.360881	0.582379	0.481603	0.440926	0.582379	0.481603
118.8	0.292608	0.338646	0.311475	0.367793	0.57461	0.494983	0.42909	0.57461	0.494983
118.9	0.30266	0.345461	0.319387	0.391281	0.565945	0.512795	0.449621	0.565945	0.512795
119	0.290825	0.350157	0.307459	0.384201	0.56412	0.504943	0.449174	0.56412	0.504943
119.1	0.29716	0.342579	0.31943	0.369136	0.574723	0.487971	0.446869	0.574723	0.487971
119.2	0.291878	0.341599	0.30832	0.346222	0.566863	0.50365	0.444406	0.566863	0.50365
119.3	0.298216	0.336491	0.315597	0.379079	0.584551	0.505017	0.444738	0.584551	0.505017
119.4	0.301552	0.344598	0.322987	0.383469	0.599142	0.489438	0.447883	0.599142	0.489438
119.5	0.302787	0.354508	0.330684	0.379817	0.586485	0.503626	0.448632	0.586485	0.503626
119.6	0.299514	0.344637	0.328208	0.370314	0.596418	0.492742	0.44524	0.596418	0.492742
119.7	0.289747	0.344975	0.324468	0.377531	0.589633	0.492524	0.449943	0.589633	0.492524
119.8	0.302076	0.345338	0.32836	0.381248	0.578098	0.494018	0.451977	0.578098	0.494018
119.9	0.296142	0.349859	0.332244	0.397058	0.587277	0.498801	0.453103	0.587277	0.498801
120	0.286692	0.344774	0.325399	0.384744	0.578738	0.483621	0.456452	0.578738	0.483621
120.1	0.297776	0.351619	0.317014	0.409488	0.567507	0.495362	0.444964	0.567507	0.495362
120.2	0.308766	0.349169	0.319568	0.400132	0.585023	0.490709	0.436669	0.585023	0.490709
120.3	0.30872	0.358789	0.324234	0.382369	0.585209	0.508024	0.44526	0.585209	0.508024
120.4	0.296057	0.349355	0.319956	0.384933	0.578238	0.486286	0.443403	0.578238	0.486286
120.5	0.288924	0.359872	0.3289	0.391812	0.570772	0.487274	0.444698	0.570772	0.487274
120.6	0.298252	0.359961	0.331335	0.399689	0.584956	0.503754	0.450292	0.584956	0.503754
120.7	0.292819	0.356473	0.330412	0.399253	0.564431	0.50636	0.45496	0.564431	0.50636
120.8	0.304105	0.357909	0.314947	0.397836	0.576534	0.519502	0.444134	0.576534	0.519502
120.9	0.293375	0.356932	0.324971	0.3875	0.562004	0.529842	0.445628	0.562004	0.529842
121	0.308353	0.348473	0.31514	0.374546	0.547887	0.504815	0.443784	0.547887	0.504815
121.1	0.299164	0.358347	0.325011	0.393694	0.562591	0.52085	0.449692	0.562591	0.52085
121.2	0.293247	0.36841	0.32606	0.373634	0.574827	0.502077	0.441576	0.574827	0.502077
121.3	0.299947	0.359287	0.31528	0.388865	0.57677	0.513263	0.448332	0.57677	0.513263
121.4	0.306168	0.363302	0.306386	0.393414	0.563545	0.510805	0.444056	0.563545	0.510805
121.5	0.299812	0.366673	0.318988	0.391623	0.573535	0.50115	0.454809	0.573535	0.50115
121.6	0.300892	0.356786	0.314961	0.389249	0.557017	0.497374	0.438683	0.557017	0.497374
121.7	0.296705	0.368126	0.325464	0.369676	0.552121	0.500186	0.445971	0.552121	0.500186
121.8	0.305728	0.353653	0.332326	0.379683	0.562191	0.499866	0.443785	0.562191	0.499866
121.9	0.308414	0.345267	0.317965	0.367849	0.55116	0.484503	0.448027	0.55116	0.484503
122	0.299083	0.352846	0.317492	0.380729	0.565243	0.498571	0.459734	0.565243	0.498571
122.1	0.30454	0.352364	0.314392	0.369444	0.560532	0.502114	0.453089	0.560532	0.502114
122.2	0.306317	0.355662	0.312105	0.380796	0.599343	0.497006	0.448927	0.599343	0.497006
122.3	0.306382	0.356048	0.309996	0.366705	0.584549	0.490147	0.453088	0.584549	0.490147
122.4	0.297509	0.354997	0.299661	0.373428	0.579324	0.500121	0.445988	0.579324	0.500121
122.5	0.30723	0.348483	0.306171	0.382241	0.610991	0.484186	0.450525	0.610991	0.484186
122.6	0.301235	0.349679	0.310269	0.378693	0.603845	0.508366	0.461103	0.603845	0.508366
122.7	0.299108	0.345596	0.316694	0.377399	0.584605	0.492828	0.457808	0.584605	0.492828
122.8	0.300738	0.363291	0.332911	0.393215	0.578135	0.491018	0.457064	0.578135	0.491018
122.9	0.30346	0.359476	0.337672	0.391224	0.56125	0.494791	0.448249	0.56125	0.494791
123	0.293809	0.348129	0.324803	0.370807	0.56537	0.499967	0.456677	0.56537	0.499967
123.1	0.302843	0.350971	0.331003	0.371041	0.565333	0.514282	0.451746	0.565333	0.514282
123.2	0.299309	0.352654	0.326094	0.371664	0.568271	0.50622	0.449552	0.568271	0.50622
123.3	0.299473	0.355724	0.337701	0.369553	0.558798	0.500886	0.464432	0.558798	0.500886
123.4	0.295752	0.356402	0.33049	0.358651	0.572081	0.510641	0.457463	0.572081	0.510641
123.5	0.29109	0.370743	0.313565	0.378392	0.56651	0.513409	0.468065	0.56651	0.513409
123.6	0.288761	0.361224	0.323202	0.370706	0.550238	0.510071	0.453146	0.550238	0.510071
123.7	0.293078	0.34703	0.339197	0.399027	0.563972	0.502766	0.44896	0.563972	0.502766
123.8	0.299222	0.356417	0.324521	0.384223	0.570491	0.499205	0.442262	0.570491	0.499205
123.9	0.304277	0.356536	0.326576	0.380194	0.559321	0.507404	0.444133	0.559321	0.507404
124	0.305913	0.352678	0.323603	0.394947	0.578268	0.509245	0.451518	0.578268	0.509245
124.1	0.306146	0.356067	0.331757	0.380988	0.564756	0.513232	0.456113	0.564756	0.513232
124.2	0.303818	0.345301	0.331343	0.375707	0.565556	0.498965	0.452529	0.565556	0.498965
124.3	0.296454	0.36259	0.331631	0.355493	0.562048	0.498455	0.458981	0.562048	0.498455
124.4	0.300144	0.35734	0.328711	0.356111	0.580817	0.498632	0.446024	0.580817	0.498632
124.5	0.30376	0.348718	0.32415	0.398835	0.573238	0.498659	0.461406	0.573238	0.498659
124.6	0.299834	0.351538	0.317541	0.370518	0.567362	0.506984	0.454618	0.567362	0.506984
124.7	0.297965	0.362904	0.336495	0.388415	0.583285	0.498934	0.464347	0.583285	0.498934
124.8	0.298013	0.361259	0.332703	0.391698	0.552406	0.494879	0.456236	0.552406	0.494879
124.9	0.298889	0.355686	0.337259	0.405264	0.565906	0.497008	0.442581	0.565906	0.497008
125	0.29479	0.352698	0.333986	0.400073	0.564774	0.509246	0.457095	0.564774	0.509246
125.1	0.289363	0.371921	0.338247	0.396674	0.557908	0.497809	0.455614	0.557908	0.497809
125.2	0.290141	0.370105	0.331135	0.396386	0.567801	0.497294	0.470415	0.567801	0.497294
125.3	0.296165	0.366633	0.340358	0.38134	0.566475	0.510379	0.460579	0.566475	0.510379
125.4	0.290332	0.367587	0.330795	0.387863	0.548949	0.51788	0.44514	0.548949	0.51788
125.5	0.295518	0.363232	0.327784	0.38344	0.558194	0.506551	0.473919	0.558194	0.506551
125.6	0.296615	0.359002	0.330645	0.365921	0.554877	0.51761	0.452083	0.554877	0.51761
125.7	0.305196	0.364599	0.314057	0.381207	0.565784	0.513254	0.448757	0.565784	0.513254
125.8	0.293802	0.356767	0.32325	0.370831	0.556189	0.506856	0.459512	0.556189	0.506856
125.9	0.304102	0.361473	0.31755	0.364389	0.554597	0.495088	0.463705	0.554597	0.495088
126	0.301259	0.37674	0.315978	0.375364	0.542826	0.501065	0.459859	0.542826	0.501065
126.1	0.304591	0.354349	0.335219	0.390543	0.570209	0.497472	0.447228	0.570209	0.497472
126.2	0.307532	0.357857	0.34215	0.37046	0.554965	0.509386	0.454367	0.554965	0.509386
126.3	0.302527	0.362189	0.349831	0.379714	0.567458	0.505441	0.452902	0.567458	0.505441
126.4	0.309747	0.365437	0.337198	0.394802	0.546079	0.504088	0.453392	0.546079	0.504088
126.5	0.301376	0.365424	0.334668	0.397229	0.563207	0.505464	0.469569	0.563207	0.505464
126.6	0.295013	0.346317	0.34129	0.407297	0.577415	0.503291	0.458979	0.577415	0.503291
126.7	0.31044	0.36309	0.337813	0.390729	0.572115	0.505473	0.456076	0.572115	0.505473
126.8	0.302789	0.356341	0.324992	0.395615	0.557231	0.511244	0.455618	0.557231	0.511244
126.9	0.305245	0.361119	0.325574	0.412947	0.562874	0.497028	0.444756	0.562874	0.497028
127	0.318203	0.361676	0.318455	0.401137	0.554688	0.509182	0.426476	0.554688	0.509182
127.1	0.31355	0.353131	0.320553	0.362965	0.569689	0.497814	0.437708	0.569689	0.497814
127.2	0.305066	0.353212	0.321063	0.372614	0.564273	0.504268	0.431003	0.564273	0.504268
127.3	0.30364	0.356952	0.312067	0.369126	0.557404	0.492976	0.438382	0.557404	0.492976
127.4	0.321918	0.349652	0.322932	0.358551	0.556951	0.495803	0.450725	0.556951	0.495803
127.5	0.314123	0.348409	0.325644	0.372721	0.575916	0.48539	0.455362	0.575916	0.48539
127.6	0.327812	0.360931	0.311568	0.370212	0.572815	0.502475	0.449133	0.572815	0.502475
127.7	0.320944	0.354192	0.318777	0.367153	0.585093	0.515091	0.455028	0.585093	0.515091
127.8	0.324389	0.359494	0.317233	0.370532	0.560513	0.504429	0.465668	0.560513	0.504429
127.9	0.32283	0.353256	0.314794	0.371333	0.555955	0.508686	0.470181	0.555955	0.508686
128	0.331066	0.346117	0.320819	0.355372	0.557696	0.518167	0.449535	0.557696	0.518167
128.1	0.32333	0.347474	0.315877	0.373321	0.557211	0.505413	0.445479	0.557211	0.505413
128.2	0.321932	0.344912	0.322309	0.378772	0.572358	0.508876	0.462072	0.572358	0.508876
128.3	0.309873	0.335795	0.316898	0.383731	0.569669	0.508988	0.450986	0.569669	0.508988
128.4	0.31343	0.343198	0.313142	0.383491	0.55296	0.499831	0.43615	0.55296	0.499831
128.5	0.319219	0.348403	0.307825	0.369741	0.555106	0.4925	0.432987	0.555106	0.4925
128.6	0.312634	0.355413	0.325863	0.359552	0.556306	0.507621	0.433064	0.556306	0.507621
128.7	0.315174	0.350643	0.310778	0.372921	0.567067	0.498125	0.441136	0.567067	0.498125
128.8	0.30208	0.351189	0.310844	0.370123	0.575817	0.494405	0.43103	0.575817	0.494405
128.9	0.316451	0.343258	0.324649	0.379547	0.560879	0.508748	0.444289	0.560879	0.508748
129	0.314161	0.347695	0.326399	0.382254	0.567107	0.502444	0.436601	0.567107	0.502444
129.1	0.307808	0.344086	0.334535	0.373281	0.56855	0.499533	0.438644	0.56855	0.499533
129.2	0.306213	0.34706	0.334469	0.376504	0.558957	0.500046	0.436671	0.558957	0.500046
129.3	0.308061	0.34308	0.31782	0.363393	0.562358	0.487711	0.43499	0.562358	0.487711
129.4	0.313701	0.345756	0.323912	0.367733	0.560216	0.482561	0.429516	0.560216	0.482561
129.5	0.318985	0.345895	0.333653	0.383222	0.54085	0.486728	0.434162	0.54085	0.486728
129.6	0.316079	0.353978	0.335348	0.395641	0.539348	0.483442	0.451188	0.539348	0.483442
129.7	0.322406	0.341702	0.333096	0.380364	0.539719	0.487	0.444978	0.539719	0.487
129.8	0.320062	0.346044	0.329513	0.389508	0.548067	0.48536	0.443211	0.548067	0.48536
129.9	0.310638	0.335038	0.320464	0.409185	0.56322	0.488642	0.446859	0.56322	0.488642
130	0.30422	0.338284	0.329334	0.401087	0.550906	0.48268	0.440021	0.550906	0.48268
130.1	0.312207	0.344917	0.321598	0.397336	0.562645	0.500569	0.437355	0.562645	0.500569
130.2	0.309326	0.347328	0.333465	0.384803	0.553418	0.481508	0.445422	0.553418	0.481508
130.3	0.316193	0.344761	0.333786	0.407924	0.554927	0.484803	0.431674	0.554927	0.484803
130.4	0.314345	0.351508	0.333078	0.386752	0.548142	0.481328	0.440741	0.548142	0.481328
130.5	0.324637	0.345359	0.320368	0.38447	0.546286	0.472936	0.446754	0.546286	0.472936
130.6	0.311728	0.349533	0.32664	0.401111	0.555596	0.491598	0.446896	0.555596	0.491598
130.7	0.309384	0.345056	0.335638	0.374469	0.56648	0.488706	0.441916	0.56648	0.488706
130.8	0.308383	0.350237	0.323277	0.38573	0.554403	0.481433	0.443213	0.554403	0.481433
130.9	0.306514	0.343635	0.326194	0.366078	0.545784	0.478727	0.436463	0.545784	0.478727
131	0.299002	0.347606	0.329233	0.371204	0.543623	0.488876	0.452915	0.543623	0.488876
131.1	0.304525	0.350974	0.319029	0.379916	0.544705	0.497943	0.446819	0.544705	0.497943
131.2	0.311873	0.347246	0.321694	0.399577	0.545173	0.480075	0.439207	0.545173	0.480075
131.3	0.304402	0.351767	0.32159	0.383584	0.556811	0.49675	0.443588	0.556811	0.49675
131.4	0.304431	0.357956	0.329151	0.379726	0.551735	0.499644	0.441027	0.551735	0.499644
131.5	0.302396	0.347135	0.330131	0.386143	0.564112	0.506377	0.449309	0.564112	0.506377
131.6	0.31136	0.344749	0.331371	0.396106	0.563145	0.514566	0.442723	0.563145	0.514566
131.7	0.313384	0.343768	0.337594	0.376901	0.560341	0.50611	0.444897	0.560341	0.50611
131.8	0.317017	0.353189	0.328802	0.381971	0.568462	0.50239	0.465953	0.568462	0.50239
131.9	0.313892	0.358773	0.323435	0.365088	0.566776	0.50119	0.459857	0.566776	0.50119
132	0.309237	0.351844	0.33346	0.356503	0.555629	0.499877	0.46694	0.555629	0.499877
132.1	0.308806	0.358443	0.335198	0.369917	0.567432	0.509467	0.447544	0.567432	0.509467
132.2	0.314384	0.3584	0.325904	0.376615	0.572431	0.506217	0.461462	0.572431	0.506217
132.3	0.310147	0.346656	0.326966	0.385954	0.565592	0.502225	0.468493	0.565592	0.502225
132.4	0.305793	0.35686	0.324227	0.38087	0.562324	0.511689	0.461201	0.562324	0.511689
132.5	0.305897	0.356753	0.335963	0.381491	0.552295	0.499681	0.458067	0.552295	0.499681
132.6	0.322839	0.349634	0.331773	0.383509	0.55137	0.521231	0.464094	0.55137	0.521231
132.7	0.317175	0.35275	0.338191	0.374155	0.575218	0.507617	0.463909	0.575218	0.507617
132.8	0.311921	0.358876	0.340496	0.387806	0.560483	0.497753	0.462403	0.560483	0.497753
132.9	0.306643	0.364558	0.337744	0.387117	0.546913	0.505191	0.446615	0.546913	0.505191
133	0.320497	0.340359	0.340911	0.37241	0.548477	0.505169	0.443534	0.548477	0.505169
133.1	0.311573	0.341911	0.339114	0.36772	0.564208	0.498546	0.461151	0.564208	0.498546
133.2	0.314747	0.360378	0.330858	0.359915	0.551366	0.500182	0.448301	0.551366	0.500182
133.3	0.311712	0.352629	0.327576	0.370765	0.537808	0.50691	0.442531	0.537808	0.50691
133.4	0.309779	0.351438	0.336979	0.356582	0.547845	0.503877	0.431883	0.547845	0.503877
133.5	0.302452	0.366034	0.334442	0.357436	0.551733	0.509216	0.435104	0.551733	0.509216
133.6	0.315143	0.364684	0.336187	0.35356	0.557818	0.519393	0.448642	0.557818	0.519393
133.7	0.318015	0.359972	0.334578	0.374898	0.548235	0.504397	0.449326	0.548235	0.504397
133.8	0.325383	0.360751	0.335618	0.372009	0.545669	0.513733	0.463344	0.545669	0.513733
133.9	0.337493	0.359334	0.339416	0.347666	0.543032	0.510658	0.453683	0.543032	0.510658
134	0.323239	0.362132	0.340955	0.352591	0.548538	0.51532	0.460605	0.548538	0.51532
134.1	0.327243	0.36899	0.332737	0.362056	0.549852	0.516346	0.460287	0.549852	0.516346
134.2	0.330469	0.369826	0.3403	0.345688	0.549282	0.510146	0.455132	0.549282	0.510146
134.3	0.31671	0.370147	0.348837	0.374799	0.534121	0.509709	0.453462	0.534121	0.509709
134.4	0.303585	0.372456	0.322831	0.352639	0.562971	0.501012	0.441582	0.562971	0.501012
134.5	0.317301	0.378027	0.327883	0.382897	0.563715	0.505102	0.442883	0.563715	0.505102
134.6	0.299948	0.366101	0.329473	0.373068	0.567845	0.501299	0.442993	0.567845	0.501299
134.7	0.299755	0.360275	0.338269	0.365317	0.565134	0.507437	0.43975	0.565134	0.507437
134.8	0.292418	0.353196	0.338094	0.361228	0.552585	0.502266	0.457807	0.552585	0.502266
134.9	0.301135	0.363642	0.352436	0.372824	0.555059	0.505568	0.446939	0.555059	0.505568
135	0.304674	0.368607	0.332979	0.369985	0.552638	0.505501	0.451047	0.552638	0.505501
135.1	0.302746	0.364889	0.336118	0.378993	0.553497	0.510675	0.452129	0.553497	0.510675
135.2	0.3004	0.359065	0.338944	0.372767	0.560696	0.513506	0.440047	0.560696	0.513506
135.3	0.286004	0.35449	0.353797	0.37928	0.552724	0.503729	0.445881	0.552724	0.503729
135.4	0.294025	0.358875	0.350753	0.36715	0.553575	0.509388	0.433046	0.553575	0.509388
135.5	0.289529	0.364869	0.348084	0.373687	0.552256	0.513126	0.440253	0.552256	0.513126
135.6	0.305327	0.3643	0.346106	0.374066	0.551431	0.503332	0.444311	0.551431	0.503332
135.7	0.300297	0.369544	0.328543	0.373475	0.564637	0.501077	0.446448	0.564637	0.501077
135.8	0.294327	0.376556	0.326911	0.384803	0.5403	0.504332	0.450067	0.5403	0.504332
135.9	0.2995	0.362307	0.32763	0.391125	0.555823	0.508826	0.445579	0.555823	0.508826
136	0.30083	0.366092	0.329087	0.389073	0.546466	0.508196	0.449643	0.546466	0.508196
136.1	0.310815	0.372116	0.337306	0.414258	0.561889	0.50867	0.445373	0.561889	0.50867
136.2	0.30328	0.361986	0.346165	0.373789	0.548782	0.512898	0.448412	0.548782	0.512898
136.3	0.307042	0.369953	0.340469	0.379152	0.547662	0.511935	0.456874	0.547662	0.511935
136.4	0.315602	0.364519	0.350545	0.376694	0.555369	0.50844	0.45251	0.555369	0.50844
136.5	0.30516	0.368384	0.338771	0.39225	0.569778	0.514917	0.457429	0.569778	0.514917
136.6	0.303471	0.36875	0.334059	0.404207	0.577817	0.525009	0.449816	0.577817	0.525009
136.7	0.318499	0.383941	0.328708	0.387944	0.586545	0.508943	0.458207	0.586545	0.508943
136.8	0.305156	0.367499	0.330642	0.380981	0.582407	0.512669	0.476895	0.582407	0.512669
136.9	0.312094	0.360222	0.331699	0.413099	0.569887	0.508593	0.468228	0.569887	0.508593
137	0.301393	0.363318	0.332397	0.401909	0.546093	0.522095	0.460191	0.546093	0.522095
137.1	0.291242	0.354241	0.329234	0.406013	0.559693	0.501492	0.467857	0.559693	0.501492
137.2	0.283073	0.361232	0.342182	0.398913	0.547957	0.504117	0.45681	0.547957	0.504117
137.3	0.276496	0.352248	0.336591	0.389328	0.54156	0.507816	0.46413	0.54156	0.507816
137.4	0.289251	0.353316	0.335939	0.421433	0.536747	0.516666	0.457342	0.536747	0.516666
137.5	0.28527	0.354351	0.329611	0.39899	0.556163	0.517877	0.460217	0.556163	0.517877
137.6	0.286641	0.3499	0.33986	0.384578	0.542259	0.515265	0.449325	0.542259	0.515265
137.7	0.290447	0.35807	0.346357	0.383412	0.553359	0.539518	0.45629	0.553359	0.539518
137.8	0.296293	0.360438	0.334413	0.381454	0.566363	0.518563	0.440499	0.566363	0.518563
137.9	0.295488	0.362288	0.350938	0.377027	0.560467	0.513235	0.449398	0.560467	0.513235
138	0.29808	0.37302	0.37577	0.392344	0.582661	0.510843	0.460037	0.582661	0.510843
138.1	0.298202	0.361591	0.358969	0.372215	0.559261	0.513935	0.453273	0.559261	0.513935
138.2	0.306603	0.358312	0.356944	0.375132	0.555442	0.521843	0.447437	0.555442	0.521843
138.3	0.305537	0.362405	0.348839	0.376529	0.560432	0.520798	0.460375	0.560432	0.520798
138.4	0.315266	0.358172	0.342834	0.374833	0.57074	0.511553	0.463579	0.57074	0.511553
138.5	0.307623	0.362857	0.347646	0.37234	0.561947	0.52471	0.460376	0.561947	0.52471
138.6	0.302119	0.361962	0.34997	0.365597	0.567441	0.517909	0.450547	0.567441	0.517909
138.7	0.306612	0.363053	0.354038	0.372501	0.55539	0.526141	0.44959	0.55539	0.526141
138.8	0.315451	0.369046	0.344008	0.401614	0.571024	0.516058	0.461702	0.571024	0.516058
138.9	0.324783	0.374607	0.359448	0.382761	0.581157	0.511783	0.466623	0.581157	0.511783
139	0.311449	0.37243	0.364195	0.393539	0.564147	0.518603	0.455197	0.564147	0.518603
139.1	0.31482	0.373956	0.356956	0.397778	0.576185	0.531015	0.451588	0.576185	0.531015
139.2	0.307499	0.365203	0.345911	0.375571	0.555725	0.533454	0.460507	0.555725	0.533454
139.3	0.313184	0.373725	0.355432	0.37304	0.562917	0.524485	0.450353	0.562917	0.524485
139.4	0.313371	0.379239	0.355668	0.355295	0.575815	0.534267	0.449721	0.575815	0.534267
139.5	0.299358	0.372105	0.345311	0.358753	0.575755	0.532328	0.447659	0.575755	0.532328
139.6	0.307777	0.382923	0.353836	0.375844	0.569457	0.531831	0.455591	0.569457	0.531831
139.7	0.306366	0.374223	0.34881	0.375349	0.558986	0.527425	0.453227	0.558986	0.527425
139.8	0.305024	0.383683	0.342398	0.388192	0.567891	0.534146	0.436824	0.567891	0.534146
139.9	0.309406	0.367885	0.358683	0.393724	0.580461	0.523831	0.44347	0.580461	0.523831
140	0.311292	0.368958	0.341613	0.373164	0.551203	0.522727	0.451509	0.551203	0.522727
140.1	0.316491	0.381993	0.348923	0.389824	0.568778	0.529876	0.441429	0.568778	0.529876
140.2	0.307623	0.372098	0.345748	0.376732	0.559893	0.539487	0.456475	0.559893	0.539487
140.3	0.306111	0.377067	0.334952	0.387103	0.571864	0.532662	0.436459	0.571864	0.532662
140.4	0.309103	0.371245	0.346618	0.370661	0.571456	0.538082	0.439707	0.571456	0.538082
140.5	0.301097	0.372791	0.349824	0.375306	0.5642	0.540104	0.446425	0.5642	0.540104
140.6	0.305525	0.37332	0.356366	0.374762	0.562231	0.533714	0.452878	0.562231	0.533714
140.7	0.31614	0.375796	0.352017	0.360114	0.542866	0.541057	0.470368	0.542866	0.541057
140.8	0.311267	0.37964	0.334665	0.375658	0.552548	0.537708	0.450558	0.552548	0.537708
140.9	0.315576	0.369101	0.361868	0.365339	0.559665	0.536005	0.453089	0.559665	0.536005
141	0.32262	0.375727	0.336523	0.356438	0.564231	0.536916	0.452994	0.564231	0.536916
141.1	0.317666	0.376393	0.32959	0.390723	0.571794	0.551484	0.443917	0.571794	0.551484
141.2	0.315429	0.370422	0.33917	0.389966	0.556614	0.54965	0.451047	0.556614	0.54965
141.3	0.314417	0.368518	0.348447	0.360697	0.549006	0.542808	0.448715	0.549006	0.542808
141.4	0.321378	0.368616	0.334066	0.359955	0.560671	0.538883	0.448656	0.560671	0.538883
141.5	0.322735	0.356947	0.341548	0.3568	0.566511	0.537747	0.457876	0.566511	0.537747
141.6	0.311804	0.360412	0.337994	0.3678	0.554186	0.5285	0.45474	0.554186	0.5285
141.7	0.294575	0.355861	0.342357	0.361529	0.565775	0.537845	0.468349	0.565775	0.537845
141.8	0.297843	0.358613	0.326329	0.368114	0.555154	0.535969	0.480261	0.555154	0.535969
141.9	0.294538	0.36969	0.327061	0.359007	0.543333	0.530178	0.457572	0.543333	0.530178
142	0.304891	0.369865	0.339682	0.365366	0.558966	0.52301	0.453301	0.558966	0.52301
142.1	0.304452	0.362086	0.339854	0.351881	0.562926	0.525787	0.476596	0.562926	0.525787
142.2	0.298458	0.35333	0.335921	0.354779	0.55811	0.523711	0.468928	0.55811	0.523711
142.3	0.302905	0.35543	0.331206	0.353615	0.550441	0.53245	0.473383	0.550441	0.53245
142.4	0.303353	0.364247	0.33042	0.370389	0.550237	0.533047	0.476672	0.550237	0.533047
142.5	0.298907	0.35895	0.341764	0.374115	0.574035	0.523716	0.462169	0.574035	0.523716
142.6	0.296309	0.353798	0.326406	0.373392	0.570254	0.52383	0.452238	0.570254	0.52383
142.7	0.303798	0.361129	0.331149	0.37898	0.573637	0.51918	0.461372	0.573637	0.51918
142.8	0.311576	0.368687	0.342151	0.391017	0.574417	0.51133	0.454549	0.574417	0.51133
142.9	0.305237	0.374461	0.335008	0.381005	0.561584	0.521857	0.465629	0.561584	0.521857
143	0.32155	0.372556	0.346658	0.395732	0.588396	0.529945	0.459237	0.588396	0.529945
143.1	0.319762	0.369894	0.343304	0.384414	0.584045	0.527085	0.472882	0.584045	0.527085
143.2	0.317266	0.363171	0.357531	0.392095	0.573178	0.516466	0.459417	0.573178	0.516466
143.3	0.30229	0.35567	0.349362	0.399313	0.553058	0.51649	0.446597	0.553058	0.51649
143.4	0.310262	0.363048	0.346634	0.380332	0.550787	0.505166	0.451609	0.550787	0.505166
143.5	0.302867	0.357576	0.349959	0.369833	0.555203	0.510163	0.466061	0.555203	0.510163
143.6	0.301474	0.358806	0.340897	0.389344	0.546812	0.514586	0.47051	0.546812	0.514586
143.7	0.308552	0.348913	0.334541	0.390642	0.571427	0.531679	0.445715	0.571427	0.531679
143.8	0.30517	0.346271	0.331223	0.399506	0.55737	0.514524	0.462463	0.55737	0.514524
143.9	0.322101	0.350574	0.324592	0.41458	0.577603	0.517952	0.482813	0.577603	0.517952
144	0.310247	0.35588	0.33255	0.396056	0.580813	0.523805	0.477794	0.580813	0.523805
144.1	0.31592	0.365253	0.328208	0.38488	0.566677	0.526363	0.464054	0.566677	0.526363
144.2	0.31324	0.35517	0.330016	0.359452	0.58002	0.525591	0.465315	0.58002	0.525591
144.3	0.313939	0.357708	0.334315	0.336199	0.572349	0.526778	0.46264	0.572349	0.526778
144.4	0.302003	0.348977	0.332153	0.347907	0.573214	0.538401	0.467765	0.573214	0.538401
144.5	0.30511	0.371926	0.321686	0.374471	0.571746	0.528064	0.470505	0.571746	0.528064
144.6	0.306645	0.364038	0.337127	0.383853	0.584326	0.527778	0.471643	0.584326	0.527778
144.7	0.302262	0.367955	0.330453	0.396336	0.580929	0.534233	0.457053	0.580929	0.534233
144.8	0.315774	0.36498	0.332753	0.377302	0.578919	0.532745	0.456018	0.578919	0.532745
144.9	0.306549	0.368401	0.335483	0.408225	0.568549	0.521296	0.466011	0.568549	0.521296
145	0.312134	0.364136	0.334314	0.409625	0.57014	0.518356	0.45982	0.57014	0.518356
145.1	0.306212	0.369097	0.328458	0.365449	0.574426	0.51869	0.464607	0.574426	0.51869
145.2	0.307782	0.37081	0.322348	0.380664	0.566635	0.511887	0.457362	0.566635	0.511887
145.3	0.313536	0.367032	0.324742	0.415839	0.572814	0.521474	0.457375	0.572814	0.521474
145.4	0.308683	0.349973	0.326126	0.387215	0.562717	0.531085	0.474883	0.562717	0.531085
145.5	0.2953	0.364011	0.331267	0.393982	0.571094	0.514741	0.475552	0.571094	0.514741
145.6	0.305428	0.356704	0.333521	0.390114	0.56338	0.500534	0.46038	0.56338	0.500534
145.7	0.30193	0.348382	0.32178	0.387066	0.570437	0.50316	0.476061	0.570437	0.50316
145.8	0.307052	0.356268	0.309913	0.390912	0.574285	0.503052	0.463637	0.574285	0.503052
145.9	0.304963	0.355235	0.321217	0.377727	0.565375	0.513866	0.469795	0.565375	0.513866
146	0.303453	0.356657	0.3258	0.395419	0.557847	0.515842	0.465471	0.557847	0.515842
146.1	0.301035	0.357032	0.322321	0.413045	0.570282	0.510368	0.470406	0.570282	0.510368
146.2	0.311214	0.356859	0.323709	0.392015	0.558877	0.509406	0.468701	0.558877	0.509406
146.3	0.308283	0.350992	0.318134	0.397165	0.552376	0.514723	0.458388	0.552376	0.514723
146.4	0.307529	0.350407	0.309266	0.403237	0.545317	0.512539	0.44769	0.545317	0.512539
146.5	0.302422	0.353931	0.320501	0.440924	0.556952	0.520056	0.462283	0.556952	0.520056
146.6	0.30465	0.356409	0.326107	0.4355	0.541383	0.508614	0.461145	0.541383	0.508614
146.7	0.297076	0.354439	0.329581	0.442102	0.553004	0.52113	0.478884	0.553004	0.52113
146.8	0.307168	0.357955	0.343229	0.415299	0.544383	0.497815	0.470583	0.544383	0.497815
146.9	0.296156	0.353712	0.319138	0.425926	0.547529	0.503466	0.472745	0.547529	0.503466
147	0.288878	0.348687	0.342355	0.440339	0.549142	0.509912	0.473938	0.549142	0.509912
147.1	0.307544	0.350896	0.31862	0.401946	0.55706	0.50842	0.466883	0.55706	0.50842
147.2	0.300198	0.349662	0.314603	0.398284	0.561909	0.516938	0.471346	0.561909	0.516938
147.3	0.311444	0.339411	0.32296	0.417217	0.549502	0.513594	0.467605	0.549502	0.513594
147.4	0.305786	0.343411	0.32311	0.396499	0.539219	0.510787	0.465516	0.539219	0.510787
147.5	0.30004	0.340305	0.304658	0.403623	0.555949	0.528026	0.471252	0.555949	0.528026
147.6	0.309605	0.345831	0.304692	0.401267	0.551937	0.521543	0.457168	0.551937	0.521543
147.7	0.316021	0.340826	0.300916	0.387744	0.548555	0.514683	0.464508	0.548555	0.514683
147.8	0.310321	0.335203	0.327748	0.389345	0.544756	0.491796	0.472494	0.544756	0.491796
147.9	0.30304	0.337244	0.319418	0.401508	0.547609	0.49587	0.475853	0.547609	0.49587
148	0.315478	0.340314	0.312315	0.397044	0.559965	0.509353	0.460811	0.559965	0.509353
148.1	0.31664	0.339512	0.333404	0.406332	0.559716	0.511025	0.45337	0.559716	0.511025
148.2	0.305398	0.340575	0.322222	0.383544	0.54453	0.509154	0.458075	0.54453	0.509154
148.3	0.304992	0.33329	0.338812	0.388417	0.537926	0.505738	0.454871	0.537926	0.505738
148.4	0.298758	0.339645	0.334589	0.394402	0.556295	0.496886	0.46406	0.556295	0.496886
148.5	0.295442	0.34225	0.338665	0.388052	0.555084	0.511316	0.453585	0.555084	0.511316
148.6	0.292123	0.334049	0.335004	0.408598	0.56982	0.511126	0.463813	0.56982	0.511126
148.7	0.292822	0.332706	0.334609	0.392108	0.566929	0.516997	0.467223	0.566929	0.516997
148.8	0.293518	0.340509	0.326902	0.399084	0.571036	0.518753	0.459113	0.571036	0.518753
148.9	0.295951	0.335053	0.324161	0.409475	0.558846	0.509836	0.461281	0.558846	0.509836
149	0.301653	0.339275	0.318455	0.431594	0.552782	0.517799	0.47592	0.552782	0.517799
149.1	0.301393	0.344035	0.328935	0.403739	0.555278	0.518722	0.456772	0.555278	0.518722
149.2	0.300598	0.340927	0.326682	0.434182	0.544926	0.517332	0.462817	0.544926	0.517332
149.3	0.304376	0.338134	0.31408	0.437241	0.553077	0.528631	0.468327	0.553077	0.528631
149.4	0.315176	0.342474	0.317115	0.413637	0.556396	0.527798	0.457757	0.556396	0.527798
149.5	0.314752	0.334176	0.316884	0.417361	0.567676	0.513332	0.46683	0.567676	0.513332
149.6	0.307541	0.338012	0.320181	0.401606	0.572093	0.502679	0.472115	0.572093	0.502679
149.7	0.31366	0.348149	0.319093	0.414962	0.576015	0.514133	0.474889	0.576015	0.514133
149.8	0.317026	0.334974	0.319977	0.443935	0.5809	0.508327	0.46845	0.5809	0.508327
149.9	0.318688	0.339863	0.311342	0.435697	0.570928	0.51938	0.489589	0.570928	0.51938
150	0.322801	0.352334	0.325058	0.413645	0.57688	0.5226	0.47366	0.57688	0.5226
150.1	0.312927	0.352721	0.324821	0.394236	0.573151	0.534139	0.487295	0.573151	0.534139
150.2	0.307855	0.358621	0.326159	0.398146	0.568385	0.52303	0.486502	0.568385	0.52303
150.3	0.311217	0.351471	0.332779	0.408062	0.571013	0.520189	0.484811	0.571013	0.520189
150.4	0.315598	0.35225	0.312382	0.398291	0.556837	0.522884	0.500372	0.556837	0.522884
150.5	0.311506	0.340246	0.316805	0.379627	0.566071	0.508254	0.480512	0.566071	0.508254
150.6	0.309165	0.33643	0.319295	0.410847	0.567021	0.513249	0.461559	0.567021	0.513249
150.7	0.311093	0.347945	0.322772	0.414502	0.56508	0.507342	0.455645	0.56508	0.507342
150.8	0.30998	0.337226	0.32501	0.419143	0.58492	0.510088	0.461669	0.58492	0.510088
150.9	0.307632	0.339299	0.323507	0.408804	0.59411	0.507215	0.463134	0.59411	0.507215
151	0.309474	0.338682	0.33337	0.407293	0.581265	0.492239	0.469144	0.581265	0.492239
151.1	0.306967	0.340988	0.3288	0.418195	0.588595	0.494094	0.465151	0.588595	0.494094
151.2	0.311194	0.335456	0.337444	0.418702	0.566896	0.501225	0.485023	0.566896	0.501225
151.3	0.322978	0.345595	0.344319	0.438989	0.564357	0.483239	0.505467	0.564357	0.483239
151.4	0.305217	0.342384	0.333725	0.428683	0.573606	0.49472	0.471846	0.573606	0.49472
151.5	0.311669	0.340002	0.336774	0.408813	0.576977	0.494516	0.480484	0.576977	0.494516
151.6	0.303093	0.337217	0.322767	0.406706	0.586539	0.509236	0.462277	0.586539	0.509236
151.7	0.304339	0.336764	0.323193	0.405425	0.576848	0.484657	0.470225	0.576848	0.484657
151.8	0.303479	0.345301	0.319671	0.423251	0.571461	0.492892	0.479436	0.571461	0.492892
151.9	0.296051	0.343206	0.32016	0.418229	0.5741	0.49083	0.485234	0.5741	0.49083
152	0.299414	0.350435	0.319504	0.42697	0.563612	0.484251	0.47767	0.563612	0.484251
152.1	0.314254	0.337072	0.330162	0.429996	0.565019	0.482138	0.485775	0.565019	0.482138
152.2	0.314245	0.336898	0.336557	0.42448	0.572065	0.494938	0.474874	0.572065	0.494938
152.3	0.307664	0.337437	0.326796	0.394591	0.577208	0.488413	0.476286	0.577208	0.488413
152.4	0.306954	0.327278	0.337929	0.41651	0.562735	0.492513	0.468718	0.562735	0.492513
152.5	0.300863	0.329008	0.320858	0.408626	0.560083	0.490919	0.480721	0.560083	0.490919
152.6	0.311603	0.334914	0.322022	0.405399	0.559333	0.498152	0.486089	0.559333	0.498152
152.7	0.311416	0.324039	0.332032	0.416601	0.553862	0.499385	0.470111	0.553862	0.499385
152.8	0.314056	0.333847	0.324739	0.380344	0.564684	0.510024	0.465967	0.564684	0.510024
152.9	0.308991	0.320792	0.32246	0.370006	0.551528	0.509119	0.456529	0.551528	0.509119
153	0.31235	0.327704	0.32263	0.392834	0.562303	0.518328	0.467032	0.562303	0.518328
153.1	0.306208	0.315102	0.323207	0.407072	0.54542	0.517885	0.460808	0.54542	0.517885
153.2	0.301075	0.334522	0.317069	0.385841	0.559242	0.513718	0.458973	0.559242	0.513718
153.3	0.294835	0.323077	0.339617	0.391734	0.567046	0.50317	0.462658	0.567046	0.50317
153.4	0.292099	0.33079	0.335253	0.381407	0.575164	0.516115	0.465203	0.575164	0.516115
153.5	0.293066	0.324198	0.331436	0.40216	0.562768	0.512082	0.471834	0.562768	0.512082
153.6	0.29664	0.329146	0.329166	0.39814	0.557267	0.502926	0.468589	0.557267	0.502926
153.7	0.300413	0.33747	0.317735	0.398778	0.550693	0.510165	0.473933	0.550693	0.510165
153.8	0.298962	0.336456	0.32921	0.38264	0.556423	0.504297	0.475786	0.556423	0.504297
153.9	0.302187	0.325164	0.324481	0.365725	0.562562	0.49642	0.462988	0.562562	0.49642
154	0.304509	0.32499	0.314106	0.365895	0.562094	0.497013	0.486033	0.562094	0.497013
154.1	0.297631	0.336562	0.332387	0.380719	0.56197	0.501131	0.4873	0.56197	0.501131
154.2	0.303387	0.33229	0.33413	0.37958	0.565879	0.499224	0.460388	0.565879	0.499224
154.3	0.309839	0.333049	0.327205	0.357527	0.565404	0.503681	0.455952	0.565404	0.503681
154.4	0.309231	0.345706	0.327886	0.408053	0.56517	0.506914	0.462796	0.56517	0.506914
154.5	0.312243	0.345622	0.31867	0.394805	0.574797	0.481598	0.454386	0.574797	0.481598
154.6	0.314562	0.339666	0.325521	0.389206	0.569526	0.491346	0.460056	0.569526	0.491346
154.7	0.306637	0.343958	0.325501	0.394983	0.558607	0.506672	0.468753	0.558607	0.506672
154.8	0.310927	0.341609	0.329794	0.379716	0.556883	0.496441	0.47429	0.556883	0.496441
154.9	0.310657	0.343847	0.321783	0.402494	0.554671	0.51333	0.462388	0.554671	0.51333
155	0.309028	0.342394	0.333187	0.381984	0.559895	0.496603	0.467663	0.559895	0.496603
155.1	0.308868	0.334806	0.330896	0.404203	0.545942	0.499094	0.450509	0.545942	0.499094
155.2	0.316661	0.338999	0.324218	0.389339	0.55728	0.491316	0.459489	0.55728	0.491316
155.3	0.299225	0.348275	0.332059	0.376886	0.5683	0.512988	0.461533	0.5683	0.512988
155.4	0.299397	0.347649	0.342128	0.411109	0.560284	0.50837	0.443441	0.560284	0.50837
155.5	0.303561	0.342204	0.338719	0.402426	0.558369	0.512999	0.453311	0.558369	0.512999
155.6	0.293076	0.341465	0.32397	0.390723	0.563071	0.50039	0.45622	0.563071	0.50039
155.7	0.285414	0.344511	0.327323	0.409142	0.573225	0.51679	0.444118	0.573225	0.51679
155.8	0.295212	0.351239	0.327731	0.390632	0.563819	0.50063	0.457011	0.563819	0.50063
155.9	0.308316	0.349396	0.331192	0.406594	0.553276	0.505663	0.442906	0.553276	0.505663
156	0.30263	0.351583	0.336175	0.395857	0.571156	0.504312	0.456983	0.571156	0.504312
156.1	0.302715	0.346251	0.326721	0.388058	0.555758	0.510276	0.460838	0.555758	0.510276
156.2	0.301342	0.334202	0.335464	0.383377	0.550753	0.502121	0.455647	0.550753	0.502121
156.3	0.295855	0.338261	0.340038	0.37618	0.566609	0.501824	0.463371	0.566609	0.501824
156.4	0.29714	0.344129	0.323497	0.369148	0.582046	0.506859	0.452131	0.582046	0.506859
156.5	0.296981	0.345714	0.337918	0.365017	0.566527	0.530837	0.450919	0.566527	0.530837
156.6	0.30075	0.340106	0.341544	0.372359	0.571865	0.524798	0.451629	0.571865	0.524798
156.7	0.302248	0.346472	0.344962	0.38034	0.574169	0.514678	0.455014	0.574169	0.514678
156.8	0.295903	0.339977	0.328393	0.383964	0.579645	0.521665	0.459009	0.579645	0.521665
156.9	0.296585	0.336853	0.329329	0.360457	0.576695	0.524244	0.462113	0.576695	0.524244
157	0.298841	0.333587	0.339516	0.363671	0.559777	0.510682	0.469865	0.559777	0.510682
157.1	0.299733	0.345861	0.338087	0.394621	0.560391	0.516016	0.464814	0.560391	0.516016
157.2	0.288294	0.333615	0.335375	0.387768	0.573721	0.511955	0.473771	0.573721	0.511955
157.3	0.298631	0.333238	0.326192	0.399797	0.596696	0.525492	0.465465	0.596696	0.525492
157.4	0.303322	0.332625	0.337255	0.405688	0.572758	0.509755	0.45445	0.572758	0.509755
157.5	0.293025	0.333078	0.325884	0.38789	0.573374	0.52918	0.460624	0.573374	0.52918
157.6	0.300204	0.342667	0.330214	0.389089	0.588098	0.520749	0.462979	0.588098	0.520749
157.7	0.297276	0.34649	0.324515	0.423612	0.579242	0.518974	0.466552	0.579242	0.518974
157.8	0.301706	0.344703	0.338182	0.420274	0.581553	0.514926	0.462998	0.581553	0.514926
157.9	0.301652	0.337942	0.33212	0.42691	0.5778	0.511748	0.47662	0.5778	0.511748
158	0.297713	0.339838	0.330331	0.400389	0.578447	0.510166	0.474655	0.578447	0.510166
158.1	0.295063	0.340952	0.348506	0.414195	0.562164	0.513687	0.47007	0.562164	0.513687
158.2	0.287994	0.348641	0.347948	0.409149	0.601048	0.512062	0.485352	0.601048	0.512062
158.3	0.298504	0.347456	0.354755	0.40971	0.594177	0.524825	0.4662	0.594177	0.524825
158.4	0.313943	0.346434	0.347321	0.392042	0.584075	0.513231	0.475281	0.584075	0.513231
158.5	0.307856	0.342796	0.335367	0.408844	0.585923	0.529525	0.471331	0.585923	0.529525
158.6	0.295167	0.338416	0.351266	0.410625	0.564307	0.532959	0.458976	0.564307	0.532959
158.7	0.300838	0.346125	0.340969	0.392367	0.575111	0.523432	0.442138	0.575111	0.523432
158.8	0.29126	0.333986	0.328593	0.402138	0.560538	0.516433	0.451323	0.560538	0.516433
158.9	0.291007	0.335083	0.332452	0.377851	0.562298	0.522157	0.465874	0.562298	0.522157
159	0.289826	0.336308	0.331369	0.368911	0.566252	0.516047	0.465346	0.566252	0.516047
159.1	0.30322	0.33581	0.33705	0.36206	0.564047	0.539219	0.459534	0.564047	0.539219
159.2	0.291747	0.328878	0.333848	0.377594	0.557146	0.535572	0.474416	0.557146	0.535572
159.3	0.295365	0.331255	0.331131	0.378929	0.566427	0.540504	0.475025	0.566427	0.540504
159.4	0.298329	0.328297	0.319981	0.400031	0.556716	0.528364	0.469742	0.556716	0.528364
159.5	0.302943	0.330294	0.333023	0.380569	0.561786	0.529457	0.46311	0.561786	0.529457
159.6	0.297179	0.336712	0.335362	0.368396	0.554738	0.531862	0.470836	0.554738	0.531862
159.7	0.291055	0.337126	0.344374	0.354613	0.567185	0.529688	0.457394	0.567185	0.529688
159.8	0.290985	0.338704	0.332895	0.381256	0.5462	0.541292	0.473744	0.5462	0.541292
159.9	0.3046	0.343796	0.325583	0.379915	0.558095	0.542297	0.461785	0.558095	0.542297
160	0.300472	0.343758	0.344236	0.368956	0.56484	0.525984	0.453176	0.56484	0.525984
160.1	0.297647	0.347895	0.330263	0.367057	0.559396	0.533453	0.471754	0.559396	0.533453
160.2	0.306256	0.348079	0.338732	0.345123	0.567418	0.537365	0.466339	0.567418	0.537365
160.3	0.304555	0.343943	0.329726	0.379813	0.558737	0.541695	0.468353	0.558737	0.541695
160.4	0.309365	0.338628	0.3324	0.363854	0.56718	0.53149	0.453467	0.56718	0.53149
160.5	0.303048	0.346994	0.334678	0.393324	0.590127	0.538781	0.452199	0.590127	0.538781
160.6	0.299693	0.344199	0.324537	0.38613	0.582644	0.543654	0.445436	0.582644	0.543654
160.7	0.299289	0.345546	0.339317	0.390632	0.56984	0.531877	0.464026	0.56984	0.531877
160.8	0.301739	0.334543	0.333956	0.386042	0.564967	0.538626	0.456747	0.564967	0.538626
160.9	0.302506	0.340107	0.331528	0.372518	0.57849	0.532545	0.465937	0.57849	0.532545
161	0.308332	0.346151	0.331045	0.392959	0.592249	0.529959	0.461659	0.592249	0.529959
161.1	0.309233	0.344034	0.343169	0.387103	0.574945	0.523414	0.456861	0.574945	0.523414
161.2	0.309681	0.334496	0.340639	0.396486	0.556191	0.532421	0.46074	0.556191	0.532421
161.3	0.315316	0.334882	0.342685	0.365234	0.560269	0.53114	0.474401	0.560269	0.53114
161.4	0.305801	0.331648	0.339346	0.392713	0.553877	0.519725	0.469647	0.553877	0.519725
161.5	0.314194	0.340811	0.333031	0.408039	0.551064	0.52762	0.461518	0.551064	0.52762
161.6	0.316002	0.357656	0.339839	0.39559	0.578973	0.518929	0.485451	0.578973	0.518929
161.7	0.31706	0.349134	0.329293	0.395253	0.582712	0.525168	0.442037	0.582712	0.525168
161.8	0.315729	0.346537	0.333538	0.388811	0.578439	0.526327	0.464913	0.578439	0.526327
161.9	0.322962	0.348191	0.343678	0.386105	0.571555	0.532201	0.473028	0.571555	0.532201
162	0.315706	0.342574	0.352142	0.407798	0.550611	0.529231	0.464005	0.550611	0.529231
162.1	0.326431	0.340597	0.338519	0.396709	0.557043	0.523636	0.480232	0.557043	0.523636
162.2	0.317771	0.328108	0.329448	0.397613	0.574433	0.535044	0.46269	0.574433	0.535044
162.3	0.319282	0.337967	0.320778	0.380865	0.568098	0.539922	0.467996	0.568098	0.539922
162.4	0.309161	0.356188	0.330324	0.382279	0.576663	0.530394	0.476288	0.576663	0.530394
162.5	0.328202	0.353337	0.33495	0.388963	0.575887	0.542285	0.467315	0.575887	0.542285
162.6	0.31853	0.352307	0.33555	0.374035	0.579969	0.523324	0.469549	0.579969	0.523324
162.7	0.321029	0.349772	0.322592	0.389986	0.579192	0.540914	0.480456	0.579192	0.540914
162.8	0.310587	0.3461	0.325927	0.379906	0.604275	0.545159	0.471057	0.604275	0.545159
162.9	0.312367	0.344915	0.314162	0.373371	0.576312	0.533466	0.483989	0.576312	0.533466
163	0.316614	0.340596	0.325952	0.388478	0.580766	0.535258	0.477728	0.580766	0.535258
163.1	0.312303	0.356106	0.327375	0.406854	0.576139	0.533061	0.473729	0.576139	0.533061
163.2	0.301681	0.351666	0.323495	0.404407	0.57143	0.534593	0.477663	0.57143	0.534593
163.3	0.30117	0.352459	0.333007	0.41338	0.560554	0.540196	0.475501	0.560554	0.540196
163.4	0.305742	0.347749	0.324824	0.422161	0.577392	0.522055	0.483923	0.577392	0.522055
163.5	0.315474	0.350304	0.332956	0.409879	0.573689	0.52658	0.46767	0.573689	0.52658
163.6	0.313352	0.35345	0.331836	0.405282	0.58675	0.525811	0.467398	0.58675	0.525811
163.7	0.314771	0.355109	0.327052	0.380817	0.55613	0.53417	0.460464	0.55613	0.53417
163.8	0.312054	0.34554	0.328894	0.381135	0.571572	0.516559	0.470909	0.571572	0.516559
163.9	0.306542	0.337992	0.320946	0.371957	0.570234	0.521149	0.485176	0.570234	0.521149
164	0.313573	0.362358	0.324642	0.379395	0.573638	0.517637	0.454531	0.573638	0.517637
164.1	0.31516	0.33892	0.321603	0.360664	0.567859	0.528421	0.461971	0.567859	0.528421
164.2	0.309884	0.348556	0.317685	0.359687	0.567206	0.522379	0.472342	0.567206	0.522379
164.3	0.316968	0.343929	0.312765	0.377923	0.572893	0.511265	0.477563	0.572893	0.511265
164.4	0.308948	0.348309	0.317943	0.371561	0.566234	0.52025	0.48054	0.566234	0.52025
164.5	0.312426	0.343147	0.317575	0.374794	0.584287	0.51906	0.466203	0.584287	0.51906
164.6	0.32072	0.347608	0.310775	0.36634	0.566554	0.525681	0.464595	0.566554	0.525681
164.7	0.305168	0.34973	0.310916	0.382213	0.573467	0.545413	0.462885	0.573467	0.545413
164.8	0.304866	0.341943	0.306144	0.371824	0.582484	0.532297	0.457503	0.582484	0.532297
164.9	0.30406	0.33883	0.312316	0.371828	0.570479	0.523469	0.460858	0.570479	0.523469
165	0.293469	0.337128	0.323921	0.378204	0.577096	0.54155	0.478126	0.577096	0.54155
165.1	0.306658	0.344267	0.328731	0.404242	0.548625	0.546117	0.476619	0.548625	0.546117
165.2	0.305878	0.352457	0.329136	0.390197	0.568368	0.533986	0.475818	0.568368	0.533986
165.3	0.302529	0.346708	0.329527	0.375613	0.556902	0.528625	0.457168	0.556902	0.528625
165.4	0.298381	0.349372	0.321107	0.365812	0.566412	0.527613	0.462472	0.566412	0.527613
165.5	0.300777	0.345075	0.33287	0.371258	0.562063	0.524173	0.476678	0.562063	0.524173
165.6	0.295193	0.33695	0.33934	0.377775	0.558894	0.532346	0.465702	0.558894	0.532346
165.7	0.296661	0.33847	0.324877	0.380125	0.554197	0.538241	0.464348	0.554197	0.538241
165.8	0.30714	0.34789	0.330943	0.36603	0.570607	0.533903	0.471746	0.570607	0.533903
165.9	0.308058	0.34263	0.341332	0.367344	0.556548	0.527582	0.457569	0.556548	0.527582
166	0.301735	0.343388	0.340705	0.35026	0.567986	0.520717	0.473814	0.567986	0.520717
166.1	0.308525	0.347079	0.331587	0.36137	0.561663	0.525733	0.479982	0.561663	0.525733
166.2	0.314043	0.34509	0.341748	0.391284	0.553618	0.520565	0.481438	0.553618	0.520565
166.3	0.307645	0.348958	0.328271	0.379143	0.550628	0.528175	0.467023	0.550628	0.528175
166.4	0.304186	0.343571	0.340004	0.370329	0.555288	0.543076	0.476217	0.555288	0.543076
166.5	0.310144	0.347414	0.33611	0.389927	0.530334	0.53782	0.471651	0.530334	0.53782
166.6	0.313191	0.347521	0.33045	0.383748	0.569299	0.543073	0.478853	0.569299	0.543073
166.7	0.317608	0.347548	0.324332	0.386853	0.543112	0.538456	0.479554	0.543112	0.538456
166.8	0.315291	0.340228	0.325506	0.397683	0.547832	0.533552	0.487874	0.547832	0.533552
166.9	0.311122	0.341089	0.32728	0.389014	0.54674	0.527655	0.468451	0.54674	0.527655
167	0.315877	0.333957	0.31151	0.364178	0.538381	0.529025	0.470968	0.538381	0.529025
167.1	0.319877	0.339518	0.323183	0.37697	0.552825	0.526579	0.468864	0.552825	0.526579
167.2	0.307134	0.345743	0.323668	0.349438	0.554452	0.51207	0.473166	0.554452	0.51207
167.3	0.298181	0.343236	0.324216	0.357976	0.564211	0.514852	0.472094	0.564211	0.514852
167.4	0.29895	0.348208	0.3404	0.359556	0.555623	0.533299	0.492238	0.555623	0.533299
167.5	0.301168	0.351636	0.341172	0.357486	0.555633	0.5271	0.482598	0.555633	0.5271
167.6	0.295766	0.348893	0.332823	0.347542	0.562043	0.520299	0.471523	0.562043	0.520299
167.7	0.299942	0.354018	0.329308	0.339548	0.545741	0.513146	0.471956	0.545741	0.513146
167.8	0.306683	0.344255	0.328602	0.344158	0.557739	0.533826	0.476102	0.557739	0.533826
167.9	0.305314	0.339333	0.326537	0.354515	0.559774	0.531037	0.465873	0.559774	0.531037
168	0.302845	0.334837	0.325775	0.353802	0.549059	0.52582	0.476132	0.549059	0.52582
168.1	0.298896	0.328464	0.320499	0.334	0.550964	0.53592	0.481533	0.550964	0.53592
168.2	0.305744	0.337929	0.323268	0.353582	0.565042	0.526819	0.469131	0.565042	0.526819
168.3	0.301081	0.332883	0.325997	0.369632	0.570202	0.524619	0.481824	0.570202	0.524619
168.4	0.302917	0.340412	0.32613	0.358718	0.564729	0.546368	0.463856	0.564729	0.546368
168.5	0.306373	0.347742	0.323951	0.343382	0.583968	0.544864	0.472217	0.583968	0.544864
168.6	0.310158	0.354561	0.316879	0.356223	0.582726	0.543151	0.479229	0.582726	0.543151
168.7	0.309578	0.353833	0.317105	0.368621	0.587058	0.555344	0.46678	0.587058	0.555344
168.8	0.30717	0.356792	0.327306	0.38676	0.590927	0.537845	0.47594	0.590927	0.537845
168.9	0.310022	0.355222	0.319808	0.38941	0.578909	0.531096	0.473909	0.578909	0.531096
169	0.308754	0.355605	0.332305	0.404106	0.57776	0.537689	0.467558	0.57776	0.537689
169.1	0.309694	0.342811	0.31127	0.385676	0.597028	0.519295	0.456637	0.597028	0.519295
169.2	0.301352	0.360104	0.310567	0.389441	0.574796	0.524312	0.46985	0.574796	0.524312
169.3	0.302827	0.358675	0.315431	0.375572	0.60187	0.510189	0.479427	0.60187	0.510189
169.4	0.300704	0.358014	0.330284	0.379705	0.571658	0.517573	0.466721	0.571658	0.517573
169.5	0.296988	0.359015	0.313953	0.346244	0.592918	0.520883	0.469828	0.592918	0.520883
169.6	0.298351	0.355988	0.333143	0.365379	0.595415	0.525238	0.474416	0.595415	0.525238
169.7	0.29136	0.357656	0.327118	0.374833	0.611135	0.541468	0.480555	0.611135	0.541468
169.8	0.296019	0.350414	0.318324	0.367088	0.597951	0.535826	0.474601	0.597951	0.535826
169.9	0.293101	0.342643	0.331674	0.368665	0.628818	0.521527	0.4785	0.628818	0.521527
170	0.284967	0.333639	0.322035	0.390632	0.612528	0.510676	0.469409	0.612528	0.510676
170.1	0.289113	0.33744	0.318246	0.378467	0.600116	0.52088	0.469797	0.600116	0.52088
170.2	0.29343	0.34332	0.319271	0.38476	0.609749	0.527666	0.482009	0.609749	0.527666
170.3	0.288844	0.340858	0.311345	0.395052	0.608922	0.521856	0.466082	0.608922	0.521856
170.4	0.289593	0.344811	0.323797	0.401062	0.610051	0.530517	0.478089	0.610051	0.530517
170.5	0.289103	0.351308	0.314504	0.402701	0.601484	0.524234	0.465622	0.601484	0.524234
170.6	0.300725	0.35178	0.315389	0.431481	0.57782	0.511404	0.484238	0.57782	0.511404
170.7	0.300472	0.340897	0.308206	0.394485	0.575462	0.526766	0.48193	0.575462	0.526766
170.8	0.293433	0.343531	0.311743	0.42381	0.609354	0.525478	0.467637	0.609354	0.525478
170.9	0.300888	0.343878	0.31036	0.41737	0.603288	0.521718	0.488727	0.603288	0.521718
171	0.302347	0.345611	0.316569	0.409135	0.605905	0.53359	0.486546	0.605905	0.53359
171.1	0.304829	0.343254	0.307956	0.404735	0.599651	0.536859	0.49646	0.599651	0.536859
171.2	0.308043	0.345099	0.308932	0.424962	0.581164	0.530875	0.487703	0.581164	0.530875
171.3	0.303725	0.343155	0.321268	0.394794	0.57486	0.531898	0.478268	0.57486	0.531898
171.4	0.310012	0.347742	0.326696	0.400527	0.587922	0.541748	0.47443	0.587922	0.541748
171.5	0.305549	0.34451	0.339332	0.395798	0.572371	0.527803	0.486398	0.572371	0.527803
171.6	0.306123	0.345318	0.328632	0.394665	0.572298	0.537925	0.487887	0.572298	0.537925
171.7	0.307195	0.342762	0.338156	0.371254	0.576056	0.54132	0.487931	0.576056	0.54132
171.8	0.304985	0.349127	0.332178	0.376155	0.579392	0.538555	0.49132	0.579392	0.538555
171.9	0.311074	0.353131	0.32836	0.362046	0.578178	0.528176	0.476743	0.578178	0.528176
172	0.314394	0.345517	0.332391	0.367999	0.577258	0.537952	0.482523	0.577258	0.537952
172.1	0.314714	0.343747	0.329644	0.357675	0.57697	0.531624	0.472544	0.57697	0.531624
172.2	0.312108	0.349965	0.328664	0.359299	0.593631	0.533926	0.485208	0.593631	0.533926
172.3	0.309588	0.354632	0.344927	0.354075	0.599298	0.535786	0.48442	0.599298	0.535786
172.4	0.31072	0.34797	0.338612	0.354869	0.594605	0.53014	0.480542	0.594605	0.53014
172.5	0.306489	0.349298	0.367161	0.370425	0.595436	0.52867	0.477806	0.595436	0.52867
172.6	0.29703	0.34981	0.342012	0.366195	0.591456	0.545298	0.493773	0.591456	0.545298
172.7	0.299729	0.353148	0.354206	0.371717	0.598321	0.525223	0.475673	0.598321	0.525223
172.8	0.295502	0.34983	0.329951	0.39761	0.594938	0.522689	0.487138	0.594938	0.522689
172.9	0.303812	0.347232	0.331722	0.387925	0.593808	0.500759	0.488376	0.593808	0.500759
173	0.30313	0.344772	0.329433	0.378291	0.598559	0.516877	0.475195	0.598559	0.516877
173.1	0.297538	0.337861	0.329811	0.375005	0.598713	0.521415	0.467191	0.598713	0.521415
173.2	0.294832	0.339763	0.31919	0.380007	0.616562	0.523737	0.469955	0.616562	0.523737
173.3	0.299335	0.344311	0.319468	0.372581	0.588778	0.521553	0.474803	0.588778	0.521553
173.4	0.293829	0.346004	0.322831	0.381222	0.599081	0.536773	0.472892	0.599081	0.536773
173.5	0.293171	0.3445	0.329694	0.373171	0.610466	0.517594	0.482019	0.610466	0.517594
173.6	0.301952	0.34948	0.336778	0.385549	0.590173	0.524817	0.480941	0.590173	0.524817
173.7	0.3083	0.347217	0.334466	0.382001	0.609159	0.519705	0.49134	0.609159	0.519705
173.8	0.315163	0.350501	0.346034	0.387347	0.603994	0.513033	0.494428	0.603994	0.513033
173.9	0.317594	0.345179	0.333334	0.375702	0.598171	0.521612	0.463463	0.598171	0.521612
174	0.308314	0.347572	0.336051	0.403975	0.602078	0.516814	0.487806	0.602078	0.516814
174.1	0.317935	0.34222	0.347666	0.404964	0.623035	0.505407	0.473814	0.623035	0.505407
174.2	0.305998	0.34674	0.340517	0.381434	0.606081	0.516868	0.479428	0.606081	0.516868
174.3	0.303269	0.351672	0.351255	0.374942	0.609839	0.522788	0.462794	0.609839	0.522788
174.4	0.298566	0.345916	0.343059	0.3774	0.577587	0.511424	0.478133	0.577587	0.511424
174.5	0.296657	0.347856	0.360433	0.385617	0.591943	0.52553	0.493732	0.591943	0.52553
174.6	0.305239	0.353907	0.344992	0.408821	0.577307	0.527815	0.482928	0.577307	0.527815
174.7	0.306828	0.353598	0.348393	0.387835	0.585089	0.530111	0.48561	0.585089	0.530111
174.8	0.305467	0.359408	0.349576	0.389961	0.594831	0.528093	0.481316	0.594831	0.528093
174.9	0.306056	0.363523	0.341315	0.387461	0.60271	0.515804	0.464449	0.60271	0.515804
175	0.31012	0.356742	0.345027	0.390094	0.6065	0.530425	0.48737	0.6065	0.530425
175.1	0.298847	0.364121	0.341888	0.386188	0.611408	0.511756	0.482847	0.611408	0.511756
175.2	0.302917	0.361506	0.335207	0.402346	0.617305	0.517077	0.46685	0.617305	0.517077
175.3	0.306285	0.364851	0.35585	0.398881	0.632931	0.516931	0.492138	0.632931	0.516931
175.4	0.302227	0.364581	0.35192	0.391612	0.610613	0.508724	0.489702	0.610613	0.508724
175.5	0.291179	0.360058	0.352913	0.380285	0.61187	0.5354	0.48049	0.61187	0.5354
175.6	0.29194	0.34498	0.349252	0.377266	0.626067	0.523243	0.494975	0.626067	0.523243
175.7	0.298482	0.351577	0.336016	0.391164	0.600552	0.531345	0.47326	0.600552	0.531345
175.8	0.305231	0.35067	0.346773	0.381269	0.61274	0.525956	0.47189	0.61274	0.525956
175.9	0.305792	0.344305	0.356409	0.388863	0.599885	0.519125	0.46401	0.599885	0.519125
176	0.303634	0.348009	0.356328	0.377146	0.605245	0.526148	0.464213	0.605245	0.526148
176.1	0.306749	0.345994	0.367151	0.391734	0.616956	0.529745	0.47362	0.616956	0.529745
176.2	0.300966	0.34654	0.347664	0.373432	0.640279	0.528659	0.464795	0.640279	0.528659
176.3	0.302596	0.350239	0.344287	0.37094	0.647987	0.525986	0.468218	0.647987	0.525986
176.4	0.305971	0.35305	0.337599	0.36261	0.634939	0.523536	0.476478	0.634939	0.523536
176.5	0.306309	0.353629	0.34386	0.379858	0.629923	0.508552	0.472579	0.629923	0.508552
176.6	0.303962	0.361241	0.342766	0.387261	0.625317	0.52174	0.466076	0.625317	0.52174
176.7	0.300553	0.347399	0.339054	0.371331	0.639014	0.511855	0.468164	0.639014	0.511855
176.8	0.308227	0.341173	0.34342	0.373308	0.635889	0.527509	0.474445	0.635889	0.527509
176.9	0.302578	0.356683	0.334515	0.370141	0.618567	0.528445	0.453691	0.618567	0.528445
177	0.296178	0.363246	0.347988	0.36464	0.631463	0.516059	0.462473	0.631463	0.516059
177.1	0.305486	0.349525	0.343433	0.380181	0.658396	0.534994	0.459149	0.658396	0.534994
177.2	0.307285	0.35542	0.343481	0.374761	0.648044	0.52128	0.457967	0.648044	0.52128
177.3	0.305195	0.355696	0.35982	0.368543	0.646009	0.529222	0.454522	0.646009	0.529222
177.4	0.29113	0.347075	0.365612	0.372643	0.62021	0.53558	0.463097	0.62021	0.53558
177.5	0.309952	0.357375	0.354599	0.367161	0.641018	0.518915	0.464578	0.641018	0.518915
177.6	0.307885	0.357349	0.34077	0.401356	0.635816	0.522677	0.458259	0.635816	0.522677
177.7	0.304193	0.35035	0.352901	0.376236	0.646611	0.526235	0.46894	0.646611	0.526235
177.8	0.311869	0.348835	0.345249	0.364761	0.645233	0.526954	0.464768	0.645233	0.526954
177.9	0.304335	0.354602	0.330546	0.375211	0.6337	0.522195	0.456684	0.6337	0.522195
178	0.297765	0.347346	0.34505	0.40618	0.632001	0.527459	0.468046	0.632001	0.527459
178.1	0.301664	0.349934	0.337551	0.410826	0.601094	0.528288	0.457543	0.601094	0.528288
178.2	0.308662	0.36389	0.351058	0.39215	0.623092	0.519561	0.462088	0.623092	0.519561
178.3	0.30188	0.342717	0.339098	0.394174	0.590617	0.530534	0.472011	0.590617	0.530534
178.4	0.311297	0.356894	0.34531	0.414876	0.594853	0.531862	0.473708	0.594853	0.531862
178.5	0.305867	0.355943	0.345097	0.401681	0.588068	0.51188	0.482789	0.588068	0.51188
178.6	0.294159	0.355299	0.336096	0.387747	0.603533	0.522413	0.479203	0.603533	0.522413
178.7	0.303091	0.36458	0.335371	0.397116	0.584261	0.513157	0.476469	0.584261	0.513157
178.8	0.293594	0.357407	0.336772	0.411605	0.616815	0.52919	0.477437	0.616815	0.52919
178.9	0.295038	0.368369	0.342175	0.395842	0.619266	0.514503	0.478503	0.619266	0.514503
179	0.303536	0.357285	0.334425	0.39716	0.61017	0.519363	0.4958	0.61017	0.519363
179.1	0.302995	0.363755	0.332732	0.400999	0.621842	0.530315	0.473372	0.621842	0.530315
179.2	0.304124	0.362815	0.340795	0.386091	0.619774	0.529509	0.486895	0.619774	0.529509
179.3	0.309849	0.35842	0.346709	0.408387	0.620325	0.524311	0.474057	0.620325	0.524311
179.4	0.317221	0.360781	0.334188	0.419111	0.60782	0.534041	0.459527	0.60782	0.534041
179.5	0.31297	0.354525	0.34052	0.407479	0.600578	0.539428	0.483903	0.600578	0.539428
179.6	0.305541	0.349383	0.335341	0.417684	0.596789	0.53016	0.474027	0.596789	0.53016
179.7	0.31089	0.359856	0.346109	0.436929	0.61181	0.534709	0.490049	0.61181	0.534709
179.8	0.331009	0.367742	0.355075	0.415102	0.609474	0.535547	0.482017	0.609474	0.535547
179.9	0.321085	0.361242	0.355625	0.400718	0.61141	0.540991	0.493535	0.61141	0.540991
180	0.316209	0.355842	0.345652	0.373261	0.622463	0.52764	0.485248	0.622463	0.52764
180.1	0.311457	0.363385	0.351425	0.363783	0.610266	0.521308	0.484757	0.610266	0.521308
180.2	0.31872	0.359494	0.364842	0.393831	0.61663	0.527837	0.478492	0.61663	0.527837
180.3	0.323892	0.363689	0.349369	0.416178	0.610305	0.537199	0.486683	0.610305	0.537199
180.4	0.321829	0.362714	0.353734	0.41233	0.608488	0.529179	0.47879	0.608488	0.529179
180.5	0.321798	0.360997	0.353428	0.423006	0.605792	0.512139	0.482969	0.605792	0.512139
180.6	0.324141	0.363933	0.358914	0.436522	0.614614	0.513077	0.477774	0.614614	0.513077
180.7	0.335673	0.367275	0.347749	0.452015	0.606653	0.510622	0.465095	0.606653	0.510622
180.8	0.333263	0.361767	0.347676	0.394763	0.606099	0.527857	0.47675	0.606099	0.527857
180.9	0.328824	0.364213	0.348248	0.400435	0.597244	0.524152	0.466732	0.597244	0.524152
181	0.328001	0.365778	0.348555	0.37756	0.60566	0.530953	0.480832	0.60566	0.530953
181.1	0.33207	0.355883	0.354274	0.385974	0.599236	0.531884	0.461621	0.599236	0.531884
181.2	0.326389	0.351525	0.340975	0.403802	0.592811	0.527693	0.468387	0.592811	0.527693
181.3	0.320163	0.360556	0.341484	0.392851	0.607115	0.528239	0.465229	0.607115	0.528239
181.4	0.32831	0.363985	0.346816	0.376549	0.606758	0.517733	0.46491	0.606758	0.517733
181.5	0.323436	0.360431	0.359811	0.385403	0.606595	0.526567	0.484635	0.606595	0.526567
181.6	0.322775	0.362962	0.357026	0.382972	0.602691	0.522863	0.487083	0.602691	0.522863
181.7	0.320991	0.356898	0.34406	0.371385	0.579796	0.532393	0.473917	0.579796	0.532393
181.8	0.319493	0.364235	0.330054	0.370001	0.574505	0.529421	0.491978	0.574505	0.529421
181.9	0.319071	0.371649	0.358662	0.382515	0.58168	0.537315	0.486524	0.58168	0.537315
182	0.320768	0.359328	0.35189	0.395675	0.610876	0.532562	0.46554	0.610876	0.532562
182.1	0.313503	0.361457	0.346983	0.38526	0.608553	0.533003	0.474194	0.608553	0.533003
182.2	0.312999	0.364579	0.342644	0.382621	0.613067	0.534748	0.5084	0.613067	0.534748
182.3	0.311618	0.369623	0.351186	0.382377	0.623617	0.534873	0.492312	0.623617	0.534873
182.4	0.303357	0.356729	0.360578	0.405052	0.607549	0.520884	0.482584	0.607549	0.520884
182.5	0.313049	0.352661	0.356003	0.366712	0.620064	0.54872	0.478769	0.620064	0.54872
182.6	0.307571	0.37392	0.35963	0.371862	0.605933	0.544284	0.487756	0.605933	0.544284
182.7	0.302146	0.353195	0.369598	0.373254	0.604657	0.541177	0.462421	0.604657	0.541177
182.8	0.302664	0.357268	0.349869	0.374862	0.628704	0.550539	0.483433	0.628704	0.550539
182.9	0.306396	0.366433	0.356781	0.365607	0.619396	0.554423	0.478404	0.619396	0.554423
183	0.304806	0.365964	0.38337	0.371403	0.606378	0.533015	0.486594	0.606378	0.533015
183.1	0.305172	0.364713	0.359602	0.368106	0.592768	0.527365	0.474347	0.592768	0.527365
183.2	0.30841	0.368997	0.357008	0.360543	0.628313	0.528441	0.479358	0.628313	0.528441
183.3	0.303798	0.369111	0.36413	0.368602	0.638901	0.530718	0.487043	0.638901	0.530718
183.4	0.305405	0.354142	0.352803	0.36672	0.626577	0.525236	0.479585	0.626577	0.525236
183.5	0.295942	0.35954	0.348755	0.372867	0.635688	0.526528	0.494373	0.635688	0.526528
183.6	0.298125	0.347946	0.359084	0.37414	0.624323	0.515632	0.493113	0.624323	0.515632
183.7	0.300137	0.349757	0.357725	0.38749	0.611356	0.522932	0.471531	0.611356	0.522932
183.8	0.294553	0.347418	0.350542	0.395283	0.593513	0.53415	0.468737	0.593513	0.53415
183.9	0.300282	0.357555	0.355187	0.399837	0.6148	0.532265	0.478909	0.6148	0.532265
184	0.309316	0.355407	0.355886	0.393157	0.622308	0.52584	0.475745	0.622308	0.52584
184.1	0.303615	0.343992	0.358288	0.405932	0.610282	0.528871	0.456386	0.610282	0.528871
184.2	0.310462	0.34064	0.352269	0.407236	0.613591	0.540681	0.46565	0.613591	0.540681
184.3	0.309123	0.345592	0.360341	0.402399	0.619667	0.538167	0.457825	0.619667	0.538167
184.4	0.314832	0.350177	0.358222	0.392356	0.614119	0.5361	0.466874	0.614119	0.5361
184.5	0.320955	0.348274	0.373218	0.387106	0.615592	0.536296	0.465402	0.615592	0.536296
184.6	0.311331	0.341648	0.376409	0.375858	0.611266	0.535387	0.457877	0.611266	0.535387
184.7	0.315026	0.347366	0.372952	0.392542	0.596835	0.53217	0.469969	0.596835	0.53217
184.8	0.308605	0.342532	0.370372	0.395022	0.598945	0.533583	0.475989	0.598945	0.533583
184.9	0.312552	0.364859	0.361788	0.387079	0.603619	0.528221	0.46108	0.603619	0.528221
185	0.313627	0.34371	0.35809	0.387733	0.605928	0.528	0.475001	0.605928	0.528
185.1	0.312606	0.360957	0.378935	0.382239	0.602005	0.527738	0.475189	0.602005	0.527738
185.2	0.305633	0.351595	0.368231	0.401777	0.605579	0.53679	0.480594	0.605579	0.53679
185.3	0.311214	0.354041	0.368352	0.385119	0.586386	0.538619	0.466425	0.586386	0.538619
185.4	0.312715	0.35044	0.38549	0.379681	0.583707	0.535276	0.467009	0.583707	0.535276
185.5	0.309669	0.35541	0.35428	0.386731	0.597762	0.523936	0.483992	0.597762	0.523936
185.6	0.306761	0.35509	0.370481	0.393788	0.593322	0.530725	0.488634	0.593322	0.530725
185.7	0.309235	0.350794	0.372142	0.373205	0.594527	0.543588	0.476373	0.594527	0.543588
185.8	0.316889	0.349857	0.34917	0.349911	0.611883	0.528203	0.46292	0.611883	0.528203
185.9	0.306454	0.363981	0.345862	0.359387	0.621972	0.553834	0.469249	0.621972	0.553834
186	0.305647	0.346977	0.346994	0.364949	0.609338	0.547934	0.466241	0.609338	0.547934
186.1	0.307632	0.345801	0.375205	0.363921	0.602945	0.541624	0.479287	0.602945	0.541624
186.2	0.302279	0.348028	0.360594	0.367735	0.601458	0.541538	0.446831	0.601458	0.541538
186.3	0.308947	0.341616	0.369923	0.352812	0.593094	0.559389	0.458845	0.593094	0.559389
186.4	0.310061	0.334873	0.346859	0.385654	0.60598	0.537582	0.458677	0.60598	0.537582
186.5	0.302645	0.341305	0.347061	0.368759	0.606994	0.541919	0.464352	0.606994	0.541919
186.6	0.29265	0.341738	0.344041	0.369123	0.60568	0.544296	0.484811	0.60568	0.544296
186.7	0.294854	0.350597	0.359611	0.363646	0.593613	0.538585	0.470158	0.593613	0.538585
186.8	0.296955	0.338449	0.34414	0.366569	0.597257	0.545917	0.475216	0.597257	0.545917
186.9	0.295681	0.344141	0.338622	0.369791	0.599683	0.557788	0.469178	0.599683	0.557788
187	0.29042	0.350257	0.346151	0.346262	0.565193	0.539205	0.466856	0.565193	0.539205
187.1	0.301714	0.346206	0.350699	0.355641	0.567848	0.542497	0.479232	0.567848	0.542497
187.2	0.310447	0.347281	0.335471	0.371632	0.57924	0.546765	0.474771	0.57924	0.546765
187.3	0.305069	0.35172	0.335728	0.357301	0.569437	0.54718	0.469467	0.569437	0.54718
187.4	0.308924	0.343241	0.350534	0.352116	0.585814	0.526196	0.46663	0.585814	0.526196
187.5	0.312358	0.34638	0.356831	0.364638	0.58343	0.529982	0.462707	0.58343	0.529982
187.6	0.310504	0.343418	0.351948	0.334765	0.586013	0.531626	0.462219	0.586013	0.531626
187.7	0.307394	0.343705	0.366397	0.345336	0.611318	0.528999	0.464909	0.611318	0.528999
187.8	0.308536	0.345047	0.353537	0.336985	0.596341	0.530507	0.478206	0.596341	0.530507
187.9	0.304695	0.349499	0.345579	0.369485	0.603526	0.550019	0.481454	0.603526	0.550019
188	0.309669	0.349968	0.364696	0.36224	0.591971	0.542553	0.48782	0.591971	0.542553
188.1	0.312984	0.341427	0.35239	0.341382	0.591445	0.536221	0.475707	0.591445	0.536221
188.2	0.323096	0.341973	0.350185	0.345203	0.592377	0.54318	0.480579	0.592377	0.54318
188.3	0.316874	0.353164	0.354303	0.339464	0.59433	0.536725	0.482571	0.59433	0.536725
188.4	0.322591	0.347556	0.350275	0.348079	0.585355	0.548796	0.474579	0.585355	0.548796
188.5	0.308442	0.33964	0.356141	0.3409	0.592972	0.549468	0.48436	0.592972	0.549468
188.6	0.315497	0.338733	0.34275	0.354753	0.609326	0.545115	0.462327	0.609326	0.545115
188.7	0.312489	0.340954	0.352505	0.345547	0.606324	0.557215	0.467014	0.606324	0.557215
188.8	0.314376	0.340743	0.342494	0.330997	0.617786	0.555479	0.470863	0.617786	0.555479
188.9	0.316151	0.345961	0.33671	0.343281	0.612748	0.545999	0.477734	0.612748	0.545999
189	0.325543	0.347131	0.356848	0.342716	0.597832	0.556062	0.460405	0.597832	0.556062
189.1	0.317188	0.349722	0.348144	0.347534	0.600408	0.554321	0.466865	0.600408	0.554321
189.2	0.312975	0.351507	0.345497	0.33847	0.590867	0.566542	0.467788	0.590867	0.566542
189.3	0.323412	0.351442	0.333683	0.330256	0.578247	0.558963	0.476647	0.578247	0.558963
189.4	0.315425	0.351721	0.341878	0.342833	0.599878	0.550528	0.469584	0.599878	0.550528
189.5	0.318581	0.350506	0.360934	0.352047	0.614897	0.542053	0.477832	0.614897	0.542053
189.6	0.320768	0.356858	0.353531	0.332713	0.630231	0.540144	0.478067	0.630231	0.540144
189.7	0.31315	0.356456	0.358786	0.361241	0.621048	0.546107	0.475108	0.621048	0.546107
189.8	0.314262	0.349444	0.356984	0.35831	0.630748	0.53943	0.474389	0.630748	0.53943
189.9	0.325667	0.346996	0.365649	0.345043	0.631269	0.53895	0.477878	0.631269	0.53895
190	0.326761	0.352569	0.373255	0.34989	0.61427	0.550521	0.477052	0.61427	0.550521
190.1	0.323587	0.349314	0.378823	0.354526	0.619533	0.561385	0.474386	0.619533	0.561385
190.2	0.305038	0.353126	0.379906	0.359736	0.61126	0.563759	0.463342	0.61126	0.563759
190.3	0.307795	0.351121	0.370545	0.359029	0.626307	0.55345	0.468335	0.626307	0.55345
190.4	0.307835	0.350681	0.371373	0.354931	0.606115	0.551363	0.457029	0.606115	0.551363
190.5	0.313095	0.353288	0.367459	0.366249	0.610803	0.543783	0.465779	0.610803	0.543783
190.6	0.303994	0.354714	0.374622	0.350125	0.594683	0.561001	0.482825	0.594683	0.561001
190.7	0.313453	0.357181	0.366633	0.364612	0.596116	0.544954	0.482238	0.596116	0.544954
190.8	0.307793	0.347769	0.366551	0.380615	0.602204	0.531623	0.47263	0.602204	0.531623
190.9	0.30903	0.34532	0.384315	0.387228	0.596794	0.535023	0.45806	0.596794	0.535023
191	0.321011	0.352376	0.36636	0.36998	0.613174	0.541992	0.47362	0.613174	0.541992
191.1	0.317021	0.36045	0.370337	0.34952	0.596054	0.540541	0.478373	0.596054	0.540541
191.2	0.31351	0.344669	0.365076	0.367914	0.604212	0.542012	0.460027	0.604212	0.542012
191.3	0.311995	0.347071	0.354565	0.374814	0.591063	0.545041	0.467485	0.591063	0.545041
191.4	0.311935	0.348399	0.351454	0.370859	0.599261	0.56938	0.458023	0.599261	0.56938
191.5	0.309011	0.345854	0.359504	0.351827	0.605341	0.564953	0.471758	0.605341	0.564953
191.6	0.306262	0.344962	0.368764	0.360586	0.595303	0.582812	0.465854	0.595303	0.582812
191.7	0.294009	0.353882	0.363828	0.372005	0.599336	0.586236	0.468944	0.599336	0.586236
191.8	0.290867	0.345101	0.358252	0.379137	0.605006	0.593488	0.46724	0.605006	0.593488
191.9	0.293299	0.342863	0.356929	0.359507	0.613058	0.581183	0.46328	0.613058	0.581183
192	0.296385	0.353597	0.356532	0.347086	0.6239	0.584432	0.465326	0.6239	0.584432
192.1	0.290458	0.357406	0.347038	0.353756	0.616985	0.584484	0.465155	0.616985	0.584484
192.2	0.283261	0.35861	0.35351	0.364876	0.615372	0.575452	0.465101	0.615372	0.575452
192.3	0.281935	0.344962	0.350267	0.356219	0.590071	0.583624	0.466741	0.590071	0.583624
192.4	0.28898	0.348719	0.351656	0.340053	0.596402	0.587387	0.475843	0.596402	0.587387
192.5	0.284971	0.355911	0.34128	0.347004	0.61071	0.581612	0.457622	0.61071	0.581612
192.6	0.290211	0.365603	0.347944	0.342754	0.599772	0.584826	0.451491	0.599772	0.584826
192.7	0.296413	0.350965	0.340369	0.337277	0.612331	0.574767	0.476304	0.612331	0.574767
192.8	0.305074	0.352976	0.35464	0.344539	0.604091	0.567782	0.47583	0.604091	0.567782
192.9	0.314369	0.34909	0.361332	0.349332	0.606773	0.565394	0.476599	0.606773	0.565394
193	0.300718	0.350319	0.343002	0.35138	0.609574	0.56816	0.475764	0.609574	0.56816
193.1	0.306023	0.354561	0.350352	0.357638	0.60217	0.555771	0.470368	0.60217	0.555771
193.2	0.31132	0.369013	0.350811	0.375297	0.601744	0.562752	0.470524	0.601744	0.562752
193.3	0.301485	0.360841	0.356904	0.387726	0.622713	0.558674	0.470354	0.622713	0.558674
193.4	0.305017	0.365589	0.346783	0.375714	0.623914	0.559828	0.463798	0.623914	0.559828
193.5	0.301978	0.36666	0.34342	0.393283	0.608374	0.562791	0.456763	0.608374	0.562791
193.6	0.313105	0.364478	0.353128	0.368196	0.610279	0.546886	0.459452	0.610279	0.546886
193.7	0.322006	0.364973	0.34179	0.378348	0.619814	0.567642	0.452887	0.619814	0.567642
193.8	0.312676	0.355827	0.343279	0.386782	0.639336	0.550674	0.461219	0.639336	0.550674
193.9	0.327421	0.354808	0.344607	0.376717	0.603816	0.558911	0.441007	0.603816	0.558911
194	0.334776	0.362119	0.346634	0.386385	0.59577	0.55358	0.458759	0.59577	0.55358
194.1	0.337584	0.359045	0.346005	0.392773	0.619847	0.560209	0.47318	0.619847	0.560209
194.2	0.332042	0.360391	0.357416	0.379856	0.598568	0.554493	0.465622	0.598568	0.554493
194.3	0.319439	0.353289	0.355304	0.367163	0.602325	0.556896	0.45833	0.602325	0.556896
194.4	0.321177	0.350571	0.345484	0.360968	0.614059	0.548402	0.473909	0.614059	0.548402
194.5	0.319056	0.361178	0.347168	0.353941	0.609357	0.54861	0.457046	0.609357	0.54861
194.6	0.308982	0.365109	0.340579	0.363368	0.597218	0.554814	0.45463	0.597218	0.554814
194.7	0.309807	0.363816	0.341328	0.365928	0.5914	0.564085	0.440034	0.5914	0.564085
194.8	0.299921	0.372592	0.35544	0.369235	0.602269	0.566215	0.458251	0.602269	0.566215
194.9	0.297932	0.372187	0.338997	0.364414	0.599805	0.570598	0.460463	0.599805	0.570598
195	0.302799	0.365576	0.337425	0.354268	0.603797	0.576204	0.460282	0.603797	0.576204
195.1	0.306117	0.366456	0.33591	0.355433	0.596284	0.560698	0.454744	0.596284	0.560698
195.2	0.305599	0.355384	0.339674	0.369794	0.585699	0.562489	0.456416	0.585699	0.562489
195.3	0.310601	0.361267	0.340692	0.373273	0.618416	0.564927	0.463214	0.618416	0.564927
195.4	0.314261	0.354822	0.336382	0.380927	0.609651	0.560032	0.460669	0.609651	0.560032
195.5	0.312351	0.348018	0.336377	0.37161	0.607527	0.558611	0.456239	0.607527	0.558611
195.6	0.320705	0.348782	0.339714	0.350764	0.597772	0.569354	0.468925	0.597772	0.569354
195.7	0.311686	0.367503	0.344385	0.35735	0.612431	0.554688	0.463452	0.612431	0.554688
195.8	0.317487	0.358735	0.341859	0.362329	0.613643	0.568161	0.4744	0.613643	0.568161
195.9	0.314797	0.356913	0.331172	0.369918	0.613887	0.566553	0.462657	0.613887	0.566553
196	0.313979	0.364695	0.327282	0.383329	0.609124	0.554781	0.463131	0.609124	0.554781
196.1	0.310687	0.357572	0.333134	0.380583	0.594071	0.563166	0.46316	0.594071	0.563166
196.2	0.318493	0.359891	0.347344	0.365453	0.601774	0.55503	0.477354	0.601774	0.55503
196.3	0.311629	0.360173	0.343157	0.387493	0.592217	0.562297	0.48806	0.592217	0.562297
196.4	0.3095	0.365928	0.329841	0.370094	0.600522	0.543868	0.453177	0.600522	0.543868
196.5	0.306356	0.360573	0.345143	0.376956	0.614225	0.545538	0.470352	0.614225	0.545538
196.6	0.313285	0.365549	0.336925	0.389515	0.600127	0.548775	0.468658	0.600127	0.548775
196.7	0.30845	0.362343	0.328224	0.398081	0.594755	0.554835	0.477611	0.594755	0.554835
196.8	0.309681	0.358095	0.327765	0.402162	0.606935	0.55385	0.478128	0.606935	0.55385
196.9	0.307256	0.353155	0.328875	0.387409	0.588666	0.55058	0.468546	0.588666	0.55058
197	0.306571	0.355264	0.331419	0.376657	0.573572	0.560569	0.492906	0.573572	0.560569
197.1	0.3118	0.358539	0.333264	0.388106	0.589197	0.552709	0.485323	0.589197	0.552709
197.2	0.300132	0.361312	0.33338	0.378238	0.58226	0.546474	0.470155	0.58226	0.546474
197.3	0.306444	0.357641	0.332301	0.390158	0.591946	0.56094	0.456521	0.591946	0.56094
197.4	0.3049	0.370663	0.334133	0.402037	0.601075	0.563014	0.468826	0.601075	0.563014
197.5	0.314476	0.361787	0.338208	0.384697	0.591788	0.562457	0.459549	0.591788	0.562457
197.6	0.305891	0.360697	0.336978	0.397457	0.60142	0.543121	0.46579	0.60142	0.543121
197.7	0.301192	0.351509	0.331812	0.392648	0.59563	0.551628	0.453672	0.59563	0.551628
197.8	0.313325	0.366974	0.343128	0.411017	0.582334	0.544383	0.465569	0.582334	0.544383
197.9	0.311692	0.352847	0.348839	0.40471	0.59368	0.545743	0.482745	0.59368	0.545743
198	0.310919	0.356982	0.349081	0.441117	0.596936	0.569684	0.474521	0.596936	0.569684
198.1	0.304631	0.354989	0.347264	0.426627	0.584481	0.571161	0.464999	0.584481	0.571161
198.2	0.30729	0.355268	0.33511	0.406163	0.600894	0.580501	0.456773	0.600894	0.580501
198.3	0.307014	0.351228	0.345929	0.400221	0.594691	0.585637	0.46105	0.594691	0.585637
198.4	0.300543	0.349128	0.350492	0.42411	0.59248	0.566885	0.464176	0.59248	0.566885
198.5	0.299925	0.34603	0.343271	0.385862	0.607274	0.581511	0.451206	0.607274	0.581511
198.6	0.304013	0.356692	0.347798	0.391714	0.595833	0.576364	0.463019	0.595833	0.576364
198.7	0.317525	0.358479	0.341252	0.408376	0.615359	0.581777	0.447174	0.615359	0.581777
198.8	0.315795	0.346277	0.352662	0.409353	0.614007	0.570452	0.457995	0.614007	0.570452
198.9	0.313468	0.358879	0.343523	0.417995	0.593168	0.571649	0.458955	0.593168	0.571649
199	0.31163	0.353075	0.334592	0.379622	0.585028	0.571527	0.458775	0.585028	0.571527
199.1	0.305777	0.356035	0.340141	0.390225	0.604802	0.568721	0.449804	0.604802	0.568721
199.2	0.317504	0.367159	0.340046	0.392281	0.624699	0.5838	0.449003	0.624699	0.5838
199.3	0.327221	0.363817	0.336491	0.403503	0.608635	0.573542	0.46518	0.608635	0.573542
199.4	0.322763	0.356746	0.346854	0.39801	0.635908	0.585286	0.446334	0.635908	0.585286
199.5	0.33134	0.360054	0.330223	0.383501	0.626872	0.585081	0.463321	0.626872	0.585081
199.6	0.31924	0.35381	0.326194	0.386203	0.627586	0.590655	0.458997	0.627586	0.590655
199.7	0.310726	0.35884	0.320739	0.393236	0.624416	0.5866	0.449409	0.624416	0.5866
199.8	0.303991	0.340752	0.325487	0.378541	0.610154	0.591604	0.473722	0.610154	0.591604
[truncated: 28,002 more rows]

## Sheet: SASA
Time(ns)	s3	s20	s37	s60	s70	s80	s95
0	1183.34	1187.89	1190.27	1187.1	1195.73	1186.06	1191.69
0.1	1233.07	1254.54	1248.04	1255.52	1267.27	1269.31	1284.85
0.2	1246.37	1253.18	1253.75	1262.6	1274.56	1278.86	1280.9
0.3	1250.66	1253.9	1264.49	1276.86	1279.43	1291.09	1285.26
0.4	1264.98	1261.34	1281.15	1264.92	1292.8	1284.32	1296.5
0.5	1267.45	1258.39	1278.66	1269.35	1286.01	1283.79	1295.68
0.6	1258.76	1268.32	1276.72	1274.37	1279.68	1286.05	1269.25
0.7	1268.25	1263.89	1292.87	1284.61	1285.66	1283.86	1285.47
0.8	1265.55	1270.17	1290.81	1285.84	1267.57	1278.77	1284.86
0.9	1266.31	1258.07	1293.37	1285.51	1265.62	1291.17	1289.09
1	1257.13	1263.68	1300.72	1290.45	1271.6	1284.74	1290.86
1.1	1254.85	1256.63	1278.53	1286.31	1261.35	1280.01	1307.95
1.2	1259.93	1264.52	1276.93	1292.86	1269.68	1288.39	1292.52
1.3	1263.64	1274.29	1271.16	1305.39	1263.9	1300.95	1294.31
1.4	1260.45	1278.97	1283.15	1308.4	1257.72	1284.09	1274.2
1.5	1267.94	1269.66	1288.04	1298.43	1267.03	1290.51	1283.3
1.6	1267.52	1276.56	1289.86	1298.58	1271.01	1285.76	1282.81
1.7	1268.58	1287.51	1288.08	1288.56	1282.64	1286.91	1274.45
1.8	1270.95	1283.72	1288.2	1292.68	1275.64	1287.99	1271.83
1.9	1276.88	1285.54	1279.9	1309.91	1268.62	1303.72	1275.06
2	1272.19	1284.32	1281.39	1304.05	1279.84	1301.11	1293.4
2.1	1267.78	1274.39	1283.49	1312.03	1276.41	1290.12	1281.72
2.2	1268.92	1278.37	1284.75	1296.46	1285.36	1292.53	1286.66
2.3	1268.92	1270.49	1282.31	1302.46	1292.63	1305.1	1279.8
2.4	1269.02	1275.29	1270.96	1301.09	1281.99	1295.12	1284.12
2.5	1269.06	1290.55	1291.69	1303.83	1279.76	1283.95	1275.52
2.6	1273.28	1282.11	1267.6	1295.37	1287.63	1294.31	1288.6
2.7	1274.1	1278.69	1274.8	1302.38	1287.9	1284.22	1280.39
2.8	1283.14	1274.02	1286.38	1302.08	1283.47	1282.63	1273.9
2.9	1267.55	1271.12	1289.42	1303.46	1287.47	1286.55	1275.89
3	1269.86	1278	1277.68	1297.65	1300.98	1296.03	1272.36
3.1	1270.62	1269.2	1278.52	1290.11	1279.96	1289.64	1289.48
3.2	1285.16	1272.86	1287.68	1301.86	1287.69	1287.99	1289.18
3.3	1285.87	1275.05	1288.62	1294.64	1295.67	1295.32	1284.38
3.4	1291.15	1276.48	1289.08	1307.15	1279.1	1309.9	1291.45
3.5	1281.87	1264.9	1292.41	1306.68	1280.43	1307.57	1283.23
3.6	1281.82	1269.21	1278.94	1311.93	1293.73	1316.99	1268.3
3.7	1283.23	1263.56	1287.98	1313.81	1287.78	1313.23	1277.6
3.8	1284.81	1263.62	1283.88	1298.47	1279.41	1312.33	1280.85
3.9	1281.66	1262.35	1277.21	1303.47	1288.27	1314.62	1267.31
4	1285	1267.2	1277.07	1298.48	1281.42	1307.36	1273.89
4.1	1287.28	1270.2	1278.87	1293.37	1271.97	1302.06	1272.94
4.2	1277.82	1267.99	1284.89	1276.87	1278.03	1286.87	1263.2
4.3	1282.86	1284.33	1274.52	1274.4	1276.93	1288.81	1281.08
4.4	1290.11	1276.87	1279.95	1268.35	1279.97	1313.7	1270.76
4.5	1285.37	1280.08	1271.82	1283.04	1275.14	1309.73	1299.89
4.6	1292.38	1266.13	1273.05	1288.67	1277.04	1305	1281.78
4.7	1288.49	1262.2	1272.59	1279.5	1257.5	1317.19	1269.73
4.8	1278.14	1268.18	1263.71	1277.14	1274.52	1305.21	1264.91
4.9	1295.05	1275.6	1265.34	1274	1283.45	1310.87	1264.81
5	1289.27	1273.84	1271.89	1275.56	1264.06	1303.29	1278.19
5.1	1295.22	1279.92	1275	1281.95	1262.57	1303.5	1288.5
5.2	1290.31	1267.31	1276.12	1284.77	1285.62	1293.94	1265.4
5.3	1285.96	1270.8	1270.76	1284.02	1281.54	1292.57	1271.13
5.4	1289.42	1278.06	1266.7	1286.71	1280.09	1297.86	1268.59
5.5	1293.43	1282.26	1259.04	1276.38	1274.95	1304.73	1254.98
5.6	1303.47	1273.93	1275.62	1290.73	1275.33	1283.41	1263.1
5.7	1301.33	1267.26	1278.79	1294.44	1279.55	1294.88	1271.45
5.8	1302.42	1284.53	1267.73	1293.89	1279.42	1294.22	1269.99
5.9	1298.36	1288.08	1261.29	1302.85	1267.16	1301.99	1269.68
6	1297.48	1284.04	1273.95	1295.92	1278.04	1300.66	1261.68
6.1	1292.15	1286.96	1280.06	1289.39	1271.17	1296.05	1267.81
6.2	1287.16	1291.89	1272.46	1289.27	1289.46	1283.29	1272.51
6.3	1275.74	1287.44	1267.04	1294.95	1274.71	1302.54	1268.13
6.4	1276.3	1287.49	1277.38	1291.66	1277.93	1292.83	1266.27
6.5	1288.98	1282.45	1276.77	1283.51	1287.47	1307.16	1273.07
6.6	1285.18	1283.84	1277.96	1289.75	1280.54	1293.51	1273.1
6.7	1282.5	1281.64	1271.56	1288.12	1279.14	1287.44	1288.3
6.8	1288.14	1284.02	1278.83	1295.45	1278.33	1293.45	1270.67
6.9	1290.83	1285.31	1273.36	1285.32	1272.41	1284.12	1272.09
7	1284.55	1280.25	1273.62	1292.03	1274.56	1278.95	1263.95
7.1	1295.14	1276.98	1264.21	1280.37	1277.2	1276.02	1257.94
7.2	1290.56	1279.73	1272.02	1272.48	1275.2	1286.27	1259.87
7.3	1293.17	1269.25	1280.03	1290.6	1281.91	1278.98	1263.33
7.4	1294.72	1270.96	1274.26	1293.38	1288.04	1265.33	1272.16
7.5	1300.62	1275.89	1272.43	1298.66	1277.9	1268.99	1267.26
7.6	1299.54	1275.68	1278.78	1306.93	1275.1	1280.72	1268.84
7.7	1295.55	1281.53	1279.37	1295.65	1271.87	1277.05	1270.91
7.8	1288.2	1283.15	1276.52	1292.7	1278.43	1273.59	1275.65
7.9	1293.88	1280.14	1282.97	1294.24	1261.69	1270.52	1264.11
8	1299.6	1277.82	1283.6	1288.38	1264.37	1276.07	1259.29
8.1	1293.67	1286.84	1275.69	1295.09	1270.74	1261.79	1273.74
8.2	1309.59	1277.47	1272.26	1298.54	1261.72	1279.93	1255.53
8.3	1300.17	1279.55	1277.27	1299.61	1278.06	1274.39	1262.03
8.4	1304.07	1273.87	1284.04	1286.94	1254.53	1267.6	1265
8.5	1301.88	1282.87	1277.7	1296.73	1269.5	1268.38	1259.19
8.6	1308.69	1280.73	1273.43	1294.58	1261.32	1271.55	1265.45
8.7	1301.44	1278.22	1272.48	1286.67	1261.76	1277.52	1257.97
8.8	1302.86	1276.01	1277.37	1290.21	1255.26	1277.07	1251.17
8.9	1308.65	1270.86	1288.46	1291.76	1263.57	1267.37	1259.25
9	1302.94	1272.24	1279.22	1290.4	1254.84	1283.69	1276.63
9.1	1303.71	1277.19	1285.13	1294.53	1248.52	1282.42	1260.51
9.2	1312.23	1267.76	1283.81	1271.06	1267.31	1276.59	1252.14
9.3	1295.31	1269.71	1274.17	1283.01	1269.05	1276.67	1259.32
9.4	1304.83	1268.58	1280.6	1279.48	1264	1274.36	1254.27
9.5	1305.46	1271.86	1282.96	1283.95	1272.77	1282.37	1251.74
9.6	1300.88	1264.96	1278.4	1281.88	1264.84	1291.57	1248.39
9.7	1301.41	1276.49	1290.91	1289.81	1258.56	1280.09	1250.39
9.8	1296.92	1277.93	1284.05	1292.23	1264.11	1287.13	1255.13
9.9	1303.18	1268.44	1278.05	1289.6	1267.37	1275.55	1262.68
10	1302.89	1269.21	1280.61	1287.99	1267.81	1276.42	1257.32
10.1	1306.17	1268.88	1282.13	1290.01	1268.88	1274.2	1255.03
10.2	1306.68	1269.41	1278.98	1283.58	1268.44	1278.56	1260.33
10.3	1309.56	1273.42	1285.96	1293.91	1257.28	1276.38	1258.47
10.4	1292.92	1271	1278.12	1290.19	1255.4	1282.31	1260.34
10.5	1304.33	1285.49	1270.65	1295.43	1260.99	1286.43	1262.6
10.6	1300.62	1280.31	1272.67	1291.55	1265.35	1280.5	1268.55
10.7	1301.15	1285.24	1280.2	1285.3	1269.25	1282.65	1260.66
10.8	1300.95	1283.07	1282.77	1296.06	1266.43	1280.75	1263.92
10.9	1304.17	1279.54	1281.47	1296.4	1269.12	1276.18	1256.52
11	1305.02	1290.33	1280.68	1289.93	1274.71	1284.98	1262.43
11.1	1299.05	1283.67	1280.7	1286.51	1277.25	1288.96	1257.98
11.2	1302	1273.21	1281.65	1293.1	1278.43	1279.76	1264.59
11.3	1301.37	1291.84	1288.57	1280.06	1272.85	1281.36	1267.03
11.4	1304.86	1282.44	1277.06	1294.29	1282.65	1279.28	1258.72
11.5	1313.02	1281.39	1281.33	1295.82	1274.17	1286.29	1264.84
11.6	1313.13	1283.16	1285.42	1275.85	1281.53	1292.56	1262.91
11.7	1306.67	1284.44	1289.5	1281.52	1276.08	1294.76	1252.05
11.8	1315.46	1280.02	1288.88	1281.43	1263.8	1300.17	1259.94
11.9	1308.44	1282.37	1281.9	1277.89	1268.52	1286.28	1254.26
12	1310.44	1285.53	1277.52	1279.74	1269.27	1289.95	1269.6
12.1	1316.16	1290.78	1282.13	1289.38	1277.88	1286.52	1242.56
12.2	1314.79	1281.84	1280.37	1287.37	1271.21	1294.46	1247.34
12.3	1318.38	1285.11	1286.3	1286.26	1264.58	1285.57	1254.67
12.4	1307.49	1279.57	1275.34	1293.84	1263.71	1285.86	1256.61
12.5	1313.21	1286.98	1276.62	1292.39	1288.18	1285.44	1261.4
12.6	1313.48	1275.51	1279.41	1303.18	1269.82	1293.91	1247.43
12.7	1312.01	1284.34	1282.06	1302.17	1280.84	1296.86	1245.86
12.8	1307.87	1284.19	1288.38	1295.5	1275.95	1295.35	1252.87
12.9	1308.13	1275.23	1281.19	1293.52	1264.76	1300.94	1262.38
13	1309.87	1279.87	1294.51	1300.31	1276.68	1297.99	1253.86
13.1	1302.66	1276.34	1288.61	1284.58	1273.5	1298.37	1258.6
13.2	1307.53	1288.24	1299.62	1287.55	1270.51	1295.14	1236.23
13.3	1310.83	1283.77	1292.99	1286.06	1264.5	1283.74	1245.45
13.4	1302.76	1286.27	1285.14	1288.47	1280.89	1289.83	1230.33
13.5	1303.17	1279.47	1272.72	1286.7	1273.04	1287.17	1252.4
13.6	1303.81	1280.19	1282.72	1281.95	1273.42	1292.04	1249.24
13.7	1311.52	1284.5	1277.01	1286.57	1277.73	1296.15	1252.12
13.8	1304.15	1291.78	1271.54	1289.53	1281.03	1292.78	1255
13.9	1308.61	1290.1	1274.8	1284.95	1277.17	1283.67	1250.66
14	1308.29	1285.15	1282.16	1286.39	1268.43	1288.83	1255.06
14.1	1320.13	1281	1278.2	1289.23	1259.9	1276.97	1257.07
14.2	1317.29	1278.68	1273.16	1294.77	1265.2	1277.33	1260.89
14.3	1317.96	1283.65	1278.32	1290.52	1257.42	1283.91	1248.05
14.4	1315.78	1282.64	1289.35	1299.79	1254.54	1287	1248.6
14.5	1312.2	1286.44	1279.99	1303.91	1260.93	1305.51	1248.86
14.6	1309.29	1283.18	1288.11	1294.95	1255.15	1310.14	1247.23
14.7	1312.01	1281.17	1282.55	1282.53	1250.34	1297.9	1247.65
14.8	1319.95	1279.19	1282.53	1288.86	1252.28	1295.91	1253.67
14.9	1318.5	1279.3	1282.33	1291.98	1261.11	1297.54	1250.74
15	1316.13	1282.78	1293.29	1275.53	1281.74	1289.77	1258.38
15.1	1318.34	1272.89	1284.42	1285.66	1271.49	1289.88	1258.23
15.2	1312.6	1287.72	1283.49	1288.2	1265.95	1288.63	1243.57
15.3	1318.19	1280.61	1286.73	1291.36	1268.26	1278.85	1253.61
15.4	1317.03	1288.72	1285.84	1290.76	1270.37	1275.84	1246.9
15.5	1320.1	1285.41	1284.08	1286.27	1269.96	1288.62	1262.74
15.6	1309.6	1277.37	1280.74	1285.92	1262.69	1278.08	1240.1
15.7	1307.85	1279.35	1286.35	1290.96	1255.12	1278.01	1240.92
15.8	1311.37	1280.05	1282.69	1281.24	1256.47	1287.29	1260.93
15.9	1316.28	1284.34	1279.14	1298.04	1255.23	1300.33	1242.53
16	1312.13	1278.51	1282.35	1278.73	1274.11	1292.22	1244.19
16.1	1315.13	1283.6	1281.26	1285.07	1266.59	1285.68	1228.96
16.2	1326	1275.8	1275.24	1296.56	1261.46	1282.7	1231.32
16.3	1315.83	1277.94	1286.61	1294.46	1273.81	1274.11	1236.76
16.4	1323.18	1278.4	1282.37	1293.61	1265.03	1276.52	1257.38
16.5	1309.92	1275.17	1277.22	1289.4	1277.86	1279.14	1248.23
16.6	1307.49	1286.36	1280.42	1291.58	1267.98	1276.28	1259.09
16.7	1316.08	1287.67	1279.96	1298.12	1274.96	1274.2	1257.7
16.8	1309.89	1277.52	1275.32	1282.95	1270.09	1278.77	1255.27
16.9	1321.71	1287.8	1279.51	1286.2	1267.41	1288.33	1257.54
17	1309.61	1283.41	1273.64	1281.27	1277.39	1280.89	1274.62
17.1	1310.14	1286.15	1275.99	1287.58	1265.22	1282.21	1265.54
17.2	1305.62	1278.59	1281.98	1283.03	1261.07	1285.82	1259.15
17.3	1303.31	1275.14	1276.74	1296.99	1271.69	1279.93	1269.54
17.4	1313.44	1288.92	1271.47	1287.86	1276.65	1284.9	1264.13
17.5	1307.97	1280.56	1267.13	1291.75	1278.73	1278.26	1259.16
17.6	1307.17	1280.65	1272.56	1287.66	1263.7	1285.24	1253.69
17.7	1312.14	1277.86	1277.31	1285.22	1279.81	1272.62	1244.24
17.8	1314.81	1280.49	1277.25	1287.66	1278.12	1272.38	1254.8
17.9	1306.16	1274.76	1265.6	1293.95	1275.53	1291.67	1255.37
18	1310.94	1285.28	1275.91	1271.7	1276.25	1281.42	1262.45
18.1	1313.46	1275.3	1266.6	1284.26	1264.28	1275.61	1254.73
18.2	1318.6	1279.65	1276.42	1282.57	1273.98	1279.48	1251.91
18.3	1309.06	1274.49	1279.47	1282.37	1275.14	1276.1	1263.01
18.4	1306.64	1269.57	1279.68	1281.54	1266.21	1292.43	1254.16
18.5	1308.91	1273.41	1281.54	1265.94	1272.98	1279.39	1255.43
18.6	1305.4	1275.72	1286.41	1265.04	1272.95	1288.94	1265.22
18.7	1304.04	1275.86	1280.26	1271.88	1271.96	1289.85	1264.71
18.8	1309.44	1280.66	1269.64	1274.71	1275.73	1287.86	1254.95
18.9	1318.02	1268.51	1269.89	1270.88	1278.16	1291.85	1258.26
19	1306.58	1268.17	1274.28	1273.53	1265.55	1280.29	1270.08
19.1	1304.61	1270.76	1272.99	1274.97	1273.46	1287.01	1253.77
19.2	1321.05	1279.6	1276.36	1267.39	1266.97	1292.44	1262.48
19.3	1310.87	1278.09	1280.45	1282.6	1280.98	1270.14	1259.87
19.4	1308.88	1272.01	1281.3	1278.17	1279.14	1289.33	1270.71
19.5	1320.92	1263.75	1281.21	1273.85	1281.71	1276.72	1258.75
19.6	1312.7	1275.39	1279.42	1285.25	1286.22	1281.84	1265.47
19.7	1316.09	1281.38	1273.19	1268.73	1270.69	1276.82	1256.85
19.8	1313.51	1283.16	1276.57	1268.67	1275.71	1281.57	1244.1
19.9	1312.67	1273.98	1272.38	1269.08	1280.97	1285.48	1259.86
20	1304.21	1273.31	1268.71	1279.84	1272.12	1275.04	1243.14
20.1	1314.79	1281	1268.56	1272.2	1281.08	1287.02	1242.34
20.2	1313.8	1280.03	1272.18	1273.99	1270.54	1278.27	1244.75
20.3	1313.95	1277.13	1275.72	1269.41	1279.87	1285.4	1242.77
20.4	1317.27	1265.42	1262.23	1267.51	1289.69	1278.44	1246.39
20.5	1322.79	1276.47	1263.63	1267.35	1279.08	1278.67	1247.36
20.6	1318.23	1278.65	1261.9	1262.92	1284.07	1280.77	1251.94
20.7	1316.57	1277.1	1257.09	1277.52	1290.58	1271.22	1265.15
20.8	1306.57	1272.89	1257	1272.7	1282.79	1284.94	1263.26
20.9	1316.1	1271.95	1253.58	1276.22	1285.94	1291.97	1262.85
21	1314.5	1274.68	1246.87	1269.12	1287.36	1279.93	1258.31
21.1	1306.41	1278.14	1258.34	1268.17	1275.42	1275.65	1260.82
21.2	1312.79	1269.57	1255.02	1262.11	1293.32	1279.63	1247.34
21.3	1306.57	1284.72	1256.36	1252.51	1278.17	1285.52	1249.37
21.4	1308.15	1276.93	1266.73	1256.81	1276.21	1282.05	1248.73
21.5	1304.62	1270.78	1264.95	1261.82	1281.46	1269.73	1240.78
21.6	1310.7	1276.88	1257.95	1267.64	1274.73	1278.92	1247.53
21.7	1307.44	1273.06	1265.71	1268.34	1279.48	1278.05	1246.83
21.8	1302.78	1273.67	1262.09	1271.98	1281.47	1283.71	1256.5
21.9	1311.67	1275.49	1270.58	1269.75	1292.29	1290.4	1247.39
22	1311.56	1275.15	1271.1	1262.49	1266.7	1283.8	1256.42
22.1	1314.83	1277.88	1272.72	1270.57	1273.19	1278.07	1260.87
22.2	1311.56	1275.4	1269.13	1271.5	1281.31	1287.05	1259.52
22.3	1311.58	1274.43	1264.1	1277.1	1279.16	1281.92	1256.44
22.4	1312.47	1287.73	1266.83	1271.88	1271.39	1283.44	1260.69
22.5	1309.98	1288.36	1268.9	1273.44	1272.7	1273.61	1254.5
22.6	1321.6	1279.71	1267.57	1277.24	1272.14	1274.72	1245.22
22.7	1305.72	1283.89	1270.04	1271.48	1281.49	1279.44	1252.03
22.8	1306.81	1283.84	1266.67	1285.78	1275.23	1276.2	1256.34
22.9	1316.85	1278.97	1264.93	1279.81	1277.42	1278.11	1232.76
23	1306.92	1285.4	1257.74	1278.99	1278.47	1279.29	1244.69
23.1	1314.85	1285.34	1263.24	1273.87	1272.03	1276.71	1239.53
23.2	1319.3	1282.57	1276.75	1275.74	1266.14	1284.33	1238
23.3	1312.77	1282.76	1262.95	1271.48	1267.82	1276.68	1252.22
23.4	1329.23	1273.18	1271.03	1274.45	1265.76	1285.81	1259.49
23.5	1313.6	1271.78	1267.91	1280.39	1273.02	1292.47	1238.96
23.6	1310.71	1283.9	1263.07	1277.72	1267.12	1275.37	1234.95
23.7	1317.84	1275.43	1264.83	1271.93	1266.05	1291.17	1237.19
23.8	1323.19	1274.35	1272.72	1281.51	1260.66	1276.99	1231.34
23.9	1314.75	1274.93	1265.62	1281.43	1266.26	1280.38	1235.9
24	1311.38	1269.63	1277.51	1278.78	1252.16	1286.59	1234.8
24.1	1314.51	1284.98	1264.01	1273.73	1266.52	1292.13	1226.59
24.2	1318.11	1288.45	1268.9	1278.65	1276.05	1288.22	1244.2
24.3	1314.87	1277.09	1267.89	1271.73	1268.63	1283.56	1233.83
24.4	1305.06	1277.76	1270.1	1278.87	1259.02	1296.6	1237.21
24.5	1316.01	1279.37	1272.17	1280.71	1263.39	1292.24	1239.61
24.6	1319.84	1290.47	1276.05	1271.46	1260.81	1289.33	1230.53
24.7	1307.19	1280.12	1270.68	1263.05	1249.7	1293.28	1239.1
24.8	1317.45	1272.45	1284.69	1267.52	1251.12	1288.55	1230.38
24.9	1316.92	1271.52	1279.54	1274.96	1268.01	1294.9	1228.07
25	1312.2	1272.46	1269.61	1277.16	1252.7	1307.72	1236.89
25.1	1314.76	1280.22	1267.93	1280.45	1255.59	1300.7	1253.03
25.2	1313.83	1277.79	1268.04	1276.61	1252.6	1298.38	1227.36
25.3	1305.91	1284.22	1260.65	1275.14	1252.96	1301.7	1229.84
25.4	1306.48	1284.07	1267.14	1271.92	1258.16	1303.99	1245.87
25.5	1300.12	1285.28	1271.22	1272.27	1258.81	1293.51	1242.52
25.6	1309.28	1284.61	1277.06	1276.08	1256.69	1293.38	1241.64
25.7	1309.93	1282.28	1274.47	1277.04	1255.08	1300.82	1250.74
25.8	1296.62	1278.84	1269.45	1278.8	1267.2	1292.13	1234.98
25.9	1309.96	1277.04	1277.22	1284.52	1257.14	1297.11	1244.73
26	1309.59	1277.79	1270.49	1285.47	1262.13	1290.32	1251.28
26.1	1309.15	1277.87	1279.08	1279.94	1266.91	1280.88	1237.1
26.2	1304.2	1280.74	1276.99	1293.07	1256.09	1277.91	1244.81
26.3	1319.82	1277.97	1266.87	1278.14	1266.25	1293.94	1257.67
26.4	1319.09	1291.01	1272.82	1267.74	1249.78	1282.86	1247.57
26.5	1308.86	1295.66	1271.71	1282.95	1251.44	1278.97	1252.59
26.6	1311.39	1283.35	1270.52	1269.94	1257.23	1277.17	1249.06
26.7	1312.56	1286.52	1265.44	1262.6	1258.23	1284.35	1254.54
26.8	1314.44	1285.01	1269.88	1265.9	1250.69	1284.12	1242.12
26.9	1318.69	1291.01	1269.12	1278.76	1252.06	1291.98	1239.78
27	1308.17	1281.66	1257.98	1276.47	1254.81	1298.38	1233.6
27.1	1316.73	1281.64	1266.63	1282.24	1257.06	1285.39	1230.34
27.2	1319.96	1283.97	1264.66	1278.66	1248.21	1292.56	1252.23
27.3	1319.21	1285.72	1269.35	1281.36	1243.19	1285.98	1246.78
27.4	1321.67	1279.21	1262.38	1277.94	1247.98	1288.07	1246.72
27.5	1318.04	1279.06	1270.06	1273.34	1251.61	1275.11	1251.6
27.6	1320.33	1281.64	1268.36	1264.27	1249.09	1277.48	1245.6
27.7	1327.62	1281.97	1266.3	1267.67	1252.87	1290.2	1232.09
27.8	1317.07	1283.41	1267.34	1264.17	1242.36	1287	1263.2
27.9	1329.62	1281.4	1261.09	1271.42	1247.38	1290.65	1254.7
28	1321.47	1279.48	1269.14	1263.76	1255.19	1290.21	1250.23
28.1	1331.04	1279.34	1264.54	1260.33	1250.24	1295.75	1252.93
28.2	1320.63	1281.13	1269.32	1263.05	1242.44	1288.64	1260.53
28.3	1328.39	1271.71	1271.86	1265.28	1242.18	1293.43	1252.82
28.4	1322.42	1282.36	1264.78	1272.21	1245.51	1289.26	1257.93
28.5	1320.09	1285.72	1262.47	1262.65	1243.8	1280.71	1257.38
28.6	1327.62	1277.8	1263.52	1262	1236.39	1283.44	1255.2
28.7	1316.54	1277.07	1265.99	1262.68	1246.17	1293.62	1248.15
28.8	1309.79	1276.9	1268.5	1264.71	1235.03	1295.98	1257.76
28.9	1314.08	1283	1273.85	1260.93	1233.19	1282.87	1242.57
29	1323.01	1286.07	1278.73	1261.16	1241.05	1284.65	1249.32
29.1	1324.7	1272.42	1268.83	1269.73	1241.86	1295.2	1253.62
29.2	1321.57	1271.6	1266.87	1263.6	1227.22	1294.34	1244.84
29.3	1318.54	1270.82	1261.22	1260.49	1239.15	1294.36	1242.36
29.4	1317.2	1279.01	1265.18	1274.73	1239.71	1290.2	1257.01
29.5	1314.49	1274.91	1257.98	1265.85	1241.07	1293.52	1260.94
29.6	1321.68	1275.04	1271.14	1275.51	1233.31	1288.66	1257.82
29.7	1318.27	1272.08	1261.11	1262.46	1241.99	1289.28	1271.86
29.8	1309.99	1272.79	1264.58	1256.81	1246.91	1294.53	1256.39
29.9	1320.67	1257.75	1259.98	1257.79	1249.64	1292.4	1260.12
30	1312.12	1269.82	1262.14	1263.58	1240.87	1282.41	1253.28
30.1	1305.8	1262.85	1265.13	1266.9	1248.94	1283.04	1253.62
30.2	1303.29	1259.06	1276.71	1263.27	1239.74	1284.27	1227.94
30.3	1303.24	1264.54	1262.04	1263.74	1246.45	1279.03	1246.82
30.4	1308.99	1266.94	1271.7	1272.83	1231	1290.26	1248.28
30.5	1304.47	1272.9	1261.6	1265.7	1230.31	1288.63	1246.06
30.6	1305.51	1261.71	1274.56	1266.63	1238.44	1286.28	1247.32
30.7	1307.16	1264.53	1265.61	1258.31	1241.43	1273.46	1253.34
30.8	1307.81	1276.23	1266.95	1262.76	1244.93	1291.23	1249.12
30.9	1307.25	1268.33	1265.33	1259.05	1242.94	1283.99	1243.1
31	1301.55	1271.4	1266.33	1263.5	1244.78	1270.65	1257.85
31.1	1308.35	1270.25	1260.22	1259.37	1240.7	1274.82	1263.99
31.2	1307.53	1265.58	1263.35	1271.68	1242.84	1276.56	1254.69
31.3	1299.38	1264.65	1261.18	1270.19	1238.78	1281.09	1245.05
31.4	1308.23	1278.12	1261.94	1274.73	1234.25	1283.88	1255.75
31.5	1308.68	1259.19	1262.02	1272.28	1226.73	1278.68	1245.03
31.6	1299.32	1267.79	1256.08	1272.38	1241.7	1269.09	1259.35
31.7	1309.29	1278.65	1258.01	1274.51	1235.82	1267.67	1252.07
31.8	1311.5	1273.58	1259.35	1273.24	1246.17	1264.11	1256.72
31.9	1315.51	1268.99	1253.66	1285.82	1243.83	1271.12	1244.19
32	1311.36	1268.84	1250.24	1287.24	1257.5	1274.37	1241
32.1	1301.06	1269.13	1256.1	1276.86	1232.28	1267.73	1242.21
32.2	1302.54	1272.12	1253.75	1274.72	1246.31	1271.26	1236.89
32.3	1308.13	1272.74	1252.44	1275.95	1249.73	1286.34	1248.21
32.4	1304.72	1270.55	1254.25	1282.17	1232.71	1259.7	1253.49
32.5	1316.08	1273.94	1258.77	1275.18	1238.77	1274.65	1246.93
32.6	1318.74	1275.6	1253.4	1285.6	1237.26	1276.76	1248.9
32.7	1309.93	1280.65	1254.62	1269.22	1241.32	1267.18	1251.68
32.8	1310.24	1279.6	1250.46	1276.13	1240.23	1274.55	1248.97
32.9	1314.52	1278.43	1251.89	1272.65	1236.59	1263.82	1240.65
33	1312.21	1283.03	1244.81	1276.07	1241.03	1267.57	1244.18
33.1	1305.52	1278.79	1260.63	1273.59	1235.23	1263.16	1254.63
33.2	1300.71	1276.99	1254.14	1278.03	1247.25	1277.33	1254.4
33.3	1303.5	1267.87	1250.85	1267.7	1240.03	1275.61	1256.56
33.4	1314.64	1281.72	1252.98	1275.86	1224.79	1263.47	1249.01
33.5	1301.7	1282.25	1249.52	1269.82	1236.7	1265	1248.8
33.6	1309.91	1282.4	1253.38	1258.91	1241.18	1277.55	1249.17
33.7	1300.83	1275.47	1251.07	1267.11	1231.39	1272.87	1238.62
33.8	1303.27	1274.59	1259.82	1274.9	1230.27	1269.76	1247.04
33.9	1307.9	1271.28	1254.27	1281.83	1231.63	1268.75	1244.17
34	1307.35	1283.38	1250.13	1263.98	1225.72	1275.61	1257.95
34.1	1304.75	1274.37	1258.73	1264.96	1231.02	1277.26	1256.44
34.2	1304.59	1272.58	1256.23	1261.85	1232.03	1276	1239.11
34.3	1297.55	1269.9	1247.61	1270.26	1240.02	1265.3	1238.48
34.4	1298.79	1276.51	1249.04	1264.4	1236.7	1276.74	1250.66
34.5	1301.16	1272.16	1255.26	1267.82	1229.62	1282.13	1264.3
34.6	1306.27	1281.75	1255.7	1266.52	1232.26	1263.16	1258.42
34.7	1300.13	1276.5	1258.53	1264.29	1236.09	1270.24	1256.77
34.8	1305.74	1278	1265.61	1281.57	1239.38	1265.58	1254.97
34.9	1295.03	1282.25	1264.17	1274.72	1236.14	1275.69	1258.7
35	1294.63	1274.45	1271.89	1260.93	1239.99	1266.91	1261.33
35.1	1300.26	1281.86	1264.18	1268.62	1227.87	1267.44	1252.8
35.2	1297.37	1279.14	1269.3	1266.59	1235.59	1276.42	1243.82
35.3	1308.98	1279.57	1270.01	1264.76	1239.85	1276.26	1243.93
35.4	1308.37	1287.13	1270.83	1257.81	1248.41	1270.61	1242.28
35.5	1307.94	1280.25	1276.09	1259.95	1229.69	1272.32	1252.66
35.6	1307.73	1274.36	1257.42	1276.91	1227.46	1270.1	1241.68
35.7	1313.38	1276.24	1264.37	1267.74	1226.38	1283.8	1243.57
35.8	1311.81	1273.14	1263.55	1267.54	1227.54	1283.5	1248.97
35.9	1302.96	1277.15	1266.2	1254.29	1243.08	1274.9	1244.21
36	1306.37	1273.49	1270.53	1255.66	1233.02	1283.69	1248.17
36.1	1304.78	1271.3	1271.6	1253.79	1221.3	1275.06	1248.15
36.2	1308.94	1277.68	1263.09	1254.76	1234.62	1275.29	1239.66
36.3	1306.33	1268.27	1268.65	1249.29	1231.97	1285.47	1238.05
36.4	1315.15	1268.41	1270.46	1257.53	1227.77	1275.38	1227.31
36.5	1305.02	1280.26	1263.07	1261.07	1224.75	1278.62	1235.43
36.6	1313.72	1281.86	1268.62	1267.91	1228.3	1266.29	1231.72
36.7	1309.43	1281.63	1278.8	1260.12	1242.46	1272.56	1223.41
36.8	1307.26	1280.32	1263.36	1254.84	1240.68	1282.66	1223.31
36.9	1298.29	1273.78	1271.3	1252.82	1241.16	1279.49	1228.88
37	1315.65	1274.53	1273.99	1259.04	1233.18	1284.52	1239.28
37.1	1303.7	1283.3	1272.32	1260.71	1235.51	1269.17	1222.96
37.2	1309.28	1271.73	1264.94	1265.28	1239.22	1285.98	1227.69
37.3	1304.11	1279.29	1276.28	1256.63	1230.05	1274.59	1221.13
37.4	1308.79	1287.37	1269.45	1256.64	1230.64	1272.96	1230.3
37.5	1306.86	1284.69	1263.38	1250.64	1241.27	1288.68	1226.32
37.6	1306.8	1286.24	1265.46	1256.93	1224.93	1288.46	1243.23
37.7	1301.15	1287.93	1266.02	1261.4	1234.58	1292.27	1250.98
37.8	1310.13	1277.79	1271.23	1256.66	1237.16	1272.19	1233.67
37.9	1313.18	1284.16	1263.23	1251.81	1226.48	1275.96	1241.18
38	1311.56	1270.9	1265.08	1256.17	1234.4	1282.9	1258.16
38.1	1304.32	1282.94	1269.34	1253.66	1220.75	1271.3	1240.45
38.2	1311.08	1272.54	1272.73	1251.79	1232.73	1274.78	1244.8
38.3	1311.64	1280.03	1274.71	1254.59	1224.8	1279.92	1244.39
38.4	1308.77	1264.69	1267.56	1245.09	1226.45	1280.7	1238.16
38.5	1316.58	1268.62	1268.74	1248.58	1227.15	1281.54	1235.71
38.6	1313.99	1271.03	1273.44	1253.69	1228.11	1278.92	1243.22
38.7	1312.65	1274.59	1262.93	1265.66	1224.72	1264.12	1250.03
38.8	1312.85	1278.87	1268.64	1276.17	1221.83	1275.13	1251.54
38.9	1308.71	1265.28	1261.14	1263.62	1218.35	1259.5	1244.59
39	1315	1283.59	1258.49	1279.87	1213.62	1270.63	1244.32
39.1	1317.51	1281.15	1274.29	1272.26	1219.47	1276.25	1244.38
39.2	1315.68	1279.85	1270.63	1279.28	1228.1	1286.28	1249.28
39.3	1312.51	1277.91	1266.16	1263.29	1234.15	1276.62	1236.16
39.4	1312.77	1269.76	1258.65	1264.13	1226.43	1280.1	1249.85
39.5	1301.88	1273.36	1265.51	1262.85	1217.79	1280.32	1248.3
39.6	1311.92	1266.61	1259.91	1267.73	1227.52	1283.59	1242.42
39.7	1312.06	1262.96	1270.29	1267.2	1214.92	1266.02	1247.19
39.8	1315.23	1271.7	1274.18	1257.8	1219.55	1281.1	1244.26
39.9	1312.38	1273.78	1267.37	1257.41	1211.31	1268.67	1249.74
40	1321.23	1267.81	1263.7	1267.37	1218.99	1277.93	1248.61
40.1	1311.74	1276.27	1268.3	1257.04	1226.77	1281.04	1243.14
40.2	1306.42	1276.23	1276.62	1255.21	1219.98	1271.01	1253.21
40.3	1313.92	1274.99	1273.94	1257.21	1228.45	1263.53	1236.23
40.4	1306.67	1275.32	1276.19	1260.01	1235.98	1272.82	1240.42
40.5	1301.24	1269.07	1275.15	1262.3	1222.57	1273.45	1242.58
40.6	1308.69	1282.79	1278.93	1262.52	1228.24	1276.03	1237.39
40.7	1307.71	1279.72	1274.18	1262.55	1220.63	1261.72	1232.08
40.8	1315.1	1278.16	1279.95	1269.08	1227.99	1269.64	1237.61
40.9	1314.44	1274.13	1269.54	1265.21	1224.42	1278.62	1236.81
41	1308.4	1280.66	1263.95	1268.96	1215.31	1272.22	1233.22
41.1	1308	1269.03	1268.23	1263.6	1235.53	1271.08	1247.22
41.2	1314.08	1273.81	1267.44	1266.94	1226.89	1270.69	1242.15
41.3	1303.37	1274.18	1268.17	1256.13	1220.62	1267.13	1235
41.4	1307.65	1272.67	1259.23	1262.73	1221.69	1263.83	1240.38
41.5	1301.34	1272.28	1270.53	1269	1224.14	1271.46	1247.21
41.6	1299.97	1270.03	1269.12	1264.71	1225.74	1259.58	1232.06
41.7	1303.98	1268.42	1265.21	1257.26	1222.72	1265.43	1231.34
41.8	1303.4	1272.2	1266.71	1269.52	1231.53	1267.74	1228.56
41.9	1302.38	1273.81	1266.99	1261.81	1229.94	1266.91	1226.86
42	1304.08	1272.44	1267.03	1258.01	1233.37	1270.08	1225.63
42.1	1310.11	1281.34	1276.37	1252.89	1228.45	1269.93	1224.14
42.2	1308.2	1273.43	1272.29	1266.29	1223.52	1267.68	1223.06
42.3	1304.13	1272.02	1270.74	1259.68	1226.51	1265.94	1208.33
42.4	1299.49	1274.41	1283.81	1270.41	1229.21	1280.52	1221.68
42.5	1297	1277.11	1270.8	1262.16	1225.88	1273.97	1216.76
42.6	1301.01	1281.33	1280.56	1279.98	1225.79	1280.54	1226.19
42.7	1309.49	1272.26	1280.46	1266.63	1230.29	1273.24	1222.31
42.8	1309.23	1279.29	1273.73	1273.85	1234.72	1270.18	1220.77
42.9	1304.96	1278.92	1277.71	1277.91	1225.38	1274.31	1223.45
43	1306.06	1273.32	1281.16	1269.22	1236.41	1263.84	1229.2
43.1	1297.87	1279.89	1280.96	1267.24	1227	1263.85	1227.3
43.2	1308.55	1288.68	1270.59	1268.98	1221.43	1270	1229.36
43.3	1297.72	1281.91	1263.13	1266.96	1217.27	1254.39	1229.52
43.4	1305.07	1280.31	1271.14	1270.37	1218.91	1262.28	1236.96
43.5	1304.04	1282.92	1261.78	1275.95	1224.59	1265.59	1240.28
43.6	1298.86	1280.81	1258.13	1264.94	1227.8	1260.91	1235.11
43.7	1309.57	1279.15	1261.52	1270.7	1230.56	1262.17	1231.66
43.8	1306.17	1271.66	1264.11	1269.54	1229.24	1268.92	1235.01
43.9	1310.29	1272.19	1265.66	1265.55	1224.09	1273	1236.9
44	1301.62	1276.45	1260.3	1276.51	1227.95	1271.9	1232.5
44.1	1303.29	1277.51	1258.29	1257.68	1242.84	1260.45	1239.86
44.2	1307.47	1271.26	1259.79	1268.63	1230.42	1273.51	1242.31
44.3	1299.82	1269.49	1263.31	1266.3	1239.65	1271.21	1245.74
44.4	1301.62	1269.18	1262.09	1258.63	1231.5	1279.33	1244.73
44.5	1301.76	1262.95	1264.36	1257.74	1235.01	1276.14	1240.54
44.6	1304.43	1266.54	1268.78	1254.4	1235.06	1282.68	1242.76
44.7	1306.79	1271.08	1265.96	1253.29	1235.12	1279.44	1227.04
44.8	1299.26	1265.23	1263.11	1247.18	1236.12	1271.03	1240.55
44.9	1302.07	1256.1	1266.88	1245.05	1235.8	1262.6	1231.58
45	1299.3	1260.72	1266.92	1261.72	1241.37	1269.41	1229.89
45.1	1304.98	1264.84	1255.41	1253.33	1247.36	1261.95	1234.73
45.2	1301.86	1263.62	1267.62	1262.45	1241.84	1263.46	1242.73
45.3	1304.27	1258.54	1284.73	1262.36	1242.68	1264.68	1253.07
45.4	1305.77	1269.49	1276.5	1264.08	1230.97	1260.5	1234.79
45.5	1306.29	1270.78	1276.37	1272.19	1237.17	1259.55	1240.86
45.6	1304.07	1258.71	1276.12	1253.75	1238.65	1262.53	1235.92
45.7	1311.49	1262.06	1267.34	1254.04	1243.09	1258.45	1233.54
45.8	1306.73	1271.72	1272.95	1251.1	1243.68	1254.9	1245.61
45.9	1300.24	1268.13	1261.42	1263.93	1242.13	1254.5	1238.87
46	1301.79	1266.48	1260.82	1259.66	1250.29	1268.18	1244.73
46.1	1299.99	1265.07	1275.87	1257.73	1241.58	1263.27	1238.95
46.2	1301.09	1258.39	1261.95	1246.13	1243.33	1255.81	1238.95
46.3	1299.43	1259.63	1265.58	1249.85	1238.58	1257.65	1241.33
46.4	1304.23	1256.26	1268.02	1251.07	1242.93	1258.72	1251.63
46.5	1297.8	1261.13	1271.91	1251.03	1247.75	1256.43	1239.72
46.6	1297.27	1258.4	1267.2	1248.08	1243.52	1265.24	1240.86
46.7	1296.93	1241.85	1267.18	1260.76	1237.76	1259.6	1238.32
46.8	1299.28	1239.78	1271.1	1262.95	1232.93	1260.11	1227.78
46.9	1294.56	1253.67	1264.15	1254.02	1244.23	1263.9	1225.31
47	1287.13	1253.56	1270.23	1264.63	1246.78	1280.21	1236.17
47.1	1297.69	1254.09	1269.69	1271.98	1237.96	1276	1233.86
47.2	1296.17	1255.19	1265.54	1260.01	1244.33	1269.47	1238.86
47.3	1298.21	1261.48	1271.96	1267.52	1250.51	1262.01	1228.42
47.4	1296.9	1266.48	1269	1280.37	1257.1	1264.95	1225.43
47.5	1292.45	1272.8	1276.67	1285.54	1245.77	1275.57	1242.44
47.6	1291.98	1263.09	1276.2	1269.88	1250.11	1264.21	1233.71
47.7	1291.69	1264.7	1275.86	1274.14	1236.75	1266.17	1231.06
47.8	1284.9	1254.78	1280.38	1269.3	1242.64	1273.49	1240.75
47.9	1294.3	1263.88	1276.12	1265.85	1256.83	1261.5	1243.62
48	1288.72	1257.61	1274.26	1281.57	1248.42	1270.7	1244.71
48.1	1290.36	1253.13	1279.89	1276.92	1253.99	1258.18	1240.66
48.2	1309.78	1261.54	1275.73	1268.85	1247.7	1268.97	1237.66
48.3	1295.09	1260.95	1266.59	1282.28	1238.25	1270.81	1243.89
48.4	1294	1259.76	1272.55	1284.92	1252.57	1254.05	1240.65
48.5	1298.83	1262.49	1269.67	1283.53	1236.03	1247.03	1243.73
48.6	1294.51	1254.53	1274.28	1278.15	1236.44	1254.22	1229.9
48.7	1293.31	1264.49	1270.52	1278.01	1240.33	1255.81	1242.38
48.8	1300.86	1263.62	1275.04	1273.15	1240.36	1256.64	1245.09
48.9	1302.22	1265.22	1264.41	1274.19	1241.08	1270.2	1236.87
49	1295.41	1264.75	1274.76	1278.05	1249.75	1261.94	1228.48
49.1	1291.34	1278.85	1264.61	1272.19	1248.39	1262.07	1237.85
49.2	1295.5	1259.35	1268.82	1289.93	1252.94	1254.79	1253.04
49.3	1301.42	1268.75	1266.17	1270	1247.14	1249.87	1249.46
49.4	1302.59	1261.55	1266.54	1278.04	1243.14	1256.22	1225.77
49.5	1296.97	1264.48	1265.34	1276.92	1243.91	1266.24	1233.44
49.6	1293.26	1268.33	1269.08	1281.55	1236.16	1253.97	1229.28
49.7	1301.99	1263.26	1269.31	1278.65	1246.52	1247.03	1234.36
49.8	1301.22	1272.78	1268.87	1267.48	1236.78	1252.69	1226.72
49.9	1305.71	1267.19	1266.76	1278.44	1242.61	1247.74	1238.01
50	1305.36	1261.27	1274.99	1279.53	1244.88	1248.73	1224.1
50.1	1299.21	1263.89	1269.13	1272.25	1241.62	1251.23	1230.34
50.2	1302.37	1265	1268.01	1284.67	1239.71	1241.75	1224.15
50.3	1314.67	1260.2	1266.8	1276.83	1248.47	1239.77	1234.15
50.4	1306.36	1266.49	1272.22	1273.28	1236.42	1248.19	1220.12
50.5	1313.82	1274.24	1263.84	1286.14	1246.72	1245.85	1229.82
50.6	1309.7	1273.92	1269.66	1287.14	1238.84	1241.91	1229.22
50.7	1299.2	1265.44	1258.87	1278.14	1249.55	1248.72	1225.92
50.8	1293.29	1266.66	1265.81	1285.19	1251.77	1241.33	1233.47
50.9	1295.52	1268.78	1265.26	1277.03	1238.54	1265.86	1222.61
51	1298.08	1265.38	1265.8	1276.06	1239.59	1262.21	1225.32
51.1	1295.19	1266.02	1268.64	1276.43	1236.1	1260.24	1222.41
51.2	1301.04	1266.07	1269.63	1273.46	1249.33	1267.24	1223.11
51.3	1305.64	1270.89	1262.77	1271.47	1248.17	1258.11	1211.76
51.4	1301.2	1261	1275.96	1274.16	1246.29	1262.67	1214.03
51.5	1307.36	1264.43	1274.39	1273.96	1248.44	1257.38	1220.76
51.6	1294.43	1261.61	1270.75	1284.69	1243.49	1265.34	1222.43
51.7	1302.87	1269.49	1269.73	1273.39	1246.25	1265.06	1229.76
51.8	1303.85	1275.94	1270.62	1287.13	1244.99	1244.13	1234.03
51.9	1298.65	1267.21	1277.68	1268.04	1253.18	1256.9	1236.29
52	1307.37	1275.37	1272.02	1271.29	1261.66	1254.53	1219.3
52.1	1298.99	1266.27	1270.28	1273.43	1258.23	1248.21	1234.4
52.2	1299.99	1279.82	1262.59	1273.13	1243.21	1248.91	1228.67
52.3	1302.73	1270.15	1269.02	1276.74	1235.74	1253.06	1217.28
52.4	1298.28	1263.4	1273.96	1261.63	1251.07	1261.38	1222.18
52.5	1304.2	1268.92	1259	1271.76	1242.2	1260.67	1237.63
52.6	1295.83	1267.49	1272.37	1264.67	1241.87	1261.01	1217.18
52.7	1295.47	1267.5	1267.23	1269.95	1248.04	1269.25	1224.34
52.8	1297.04	1269.53	1269.84	1275.33	1240.39	1257.69	1226.1
52.9	1301.79	1250.86	1276.12	1268.92	1243.5	1255.16	1222.5
53	1301.97	1262	1271.75	1273.91	1239.36	1236.27	1233.27
53.1	1304.38	1268	1266.94	1267.12	1253.34	1253.21	1224.61
53.2	1305.58	1264.68	1277.27	1279.57	1249.04	1247.53	1221.37
53.3	1291.56	1259.28	1280.86	1274.79	1241.96	1247.49	1224.51
53.4	1301.92	1260.65	1270.78	1273.65	1245.21	1255.18	1220.87
53.5	1308.92	1265.83	1272.86	1272.62	1239.07	1262.3	1224.44
53.6	1306.29	1277.42	1279.49	1283.42	1231.71	1259.06	1227.07
53.7	1303.35	1273.88	1284.53	1279	1244.47	1254.03	1225.32
53.8	1308.26	1259.06	1276.72	1274.71	1250.16	1261.74	1233.57
53.9	1306.4	1270.6	1269.31	1266.7	1235.27	1256.37	1215.62
54	1306.6	1266.08	1266.75	1271.22	1225.02	1256.58	1235.59
54.1	1305.64	1264.24	1272.01	1272.3	1234.91	1250.97	1217.48
54.2	1297.7	1263.29	1267.54	1261	1231.25	1258.04	1208.55
54.3	1303.21	1266.8	1266.64	1262.01	1240.72	1252.52	1211.41
54.4	1308.45	1261.32	1256.63	1270.17	1246.36	1252.87	1216.04
54.5	1307.96	1252.93	1263.42	1263.22	1250.9	1255.36	1214.32
54.6	1312.05	1269.03	1268.76	1266.77	1232	1262.4	1212.21
54.7	1308.42	1265.04	1268.66	1267.11	1240.92	1244.3	1198.95
54.8	1308.67	1263.09	1267.4	1266.59	1245.61	1246.51	1208.81
54.9	1300.87	1253.99	1272.87	1268.29	1239.12	1231.01	1204.81
55	1295.97	1257.59	1268.09	1272.32	1246.78	1253.69	1196.51
55.1	1303.23	1264.87	1271.79	1266.41	1242.07	1253.25	1209.35
55.2	1298.19	1267.63	1277.02	1274.35	1238.92	1260.36	1208.04
55.3	1303.32	1264.44	1280.66	1272	1244	1256.27	1213.32
55.4	1304.98	1260.81	1274.08	1270.82	1241.01	1249.5	1203.04
55.5	1301.85	1245.58	1267.87	1263.71	1237.88	1252.03	1202.69
55.6	1303.84	1261.37	1278.92	1267.82	1228.36	1253.8	1201.67
55.7	1306.22	1257.23	1263.1	1260.64	1231.53	1252.17	1202.58
55.8	1312.55	1275.12	1259.48	1271.01	1230.37	1238.26	1206.66
55.9	1299.92	1271.1	1267.3	1268.34	1239.26	1244.59	1200.15
56	1302.14	1266.43	1272.66	1268.7	1246.23	1259.7	1201.56
56.1	1297.05	1265.79	1268.65	1261.5	1252.72	1250.03	1215.83
56.2	1302.06	1268.63	1273.25	1263.89	1251.73	1249.5	1199.72
56.3	1305.18	1271.49	1276.41	1275.21	1242.08	1263.45	1225.95
56.4	1298.14	1270.46	1269.76	1273.32	1251.37	1251.64	1218.13
56.5	1298.66	1273.62	1264.81	1269.11	1242.97	1247.85	1203.99
56.6	1308.83	1273.47	1265.54	1273.12	1245.15	1238.28	1206.53
56.7	1304.59	1275.99	1273.44	1258.37	1251.87	1250.51	1209.93
56.8	1298.89	1275.51	1279.11	1262.01	1243.23	1240.46	1211.35
56.9	1305.92	1286.44	1274.21	1262.15	1252.1	1244.97	1227.93
57	1304.89	1282.82	1270.87	1275.37	1246.86	1243.49	1213.95
57.1	1299.71	1275.86	1266.47	1275.07	1252.7	1236.97	1216.04
57.2	1306.78	1274.42	1274.7	1271.41	1255.8	1246.02	1219.47
57.3	1304.4	1273.91	1270.02	1280.78	1250.31	1233.68	1221.01
57.4	1303.67	1280.62	1263.36	1270.54	1255.01	1247.85	1214.74
57.5	1312.52	1275.75	1263.93	1279.05	1248.71	1250.75	1209.47
57.6	1309.77	1265.63	1266.84	1270.73	1255.59	1255.9	1205.58
57.7	1314.97	1274.55	1276.52	1273.92	1246.9	1250.42	1213.88
57.8	1318.18	1272.72	1274.44	1273.34	1247.21	1248.48	1216.85
57.9	1309.21	1276.33	1281.46	1274.91	1261.79	1242.48	1215.37
58	1305.64	1265.31	1268.58	1273.64	1241.96	1247.3	1206.68
58.1	1315.67	1271.43	1271.27	1278.63	1239.45	1246.34	1211.27
58.2	1302.52	1274.11	1267.04	1286.29	1250.03	1245.25	1217.42
58.3	1313.93	1271.29	1269.9	1273.66	1257.33	1241.53	1216.36
58.4	1308.69	1279.16	1265.54	1279.3	1252.98	1247.72	1221.01
58.5	1312.48	1266.62	1274.41	1280.31	1231.21	1241.51	1215.44
58.6	1313.28	1267.73	1269.65	1272.15	1237.03	1239.26	1210.28
58.7	1310.79	1273.43	1275.28	1274.96	1241.52	1249.34	1223.01
58.8	1308.88	1259.89	1283.55	1279.82	1231.27	1250.92	1214.61
58.9	1304.04	1261.39	1280.85	1276.56	1238.45	1241.26	1220.21
59	1301.11	1268	1281.08	1267.79	1232.47	1245.05	1223
59.1	1297.69	1254.63	1287.37	1270.45	1232.74	1242.82	1216.73
59.2	1302.16	1271.07	1282.07	1272.88	1236.78	1236.76	1208.27
59.3	1305.06	1262.22	1288.42	1269.89	1227.41	1247.52	1214.99
59.4	1307.17	1268.4	1285.76	1278.04	1233.22	1240.14	1217.84
59.5	1308.98	1270.87	1297.86	1274.1	1225.9	1250	1218.84
59.6	1309.14	1264.26	1291.34	1278.09	1225.59	1245.16	1209.87
59.7	1312.9	1274	1291.04	1283.29	1239.78	1244.83	1207.23
59.8	1316.1	1262.26	1284.15	1283.65	1240.77	1241.65	1213.17
59.9	1324.49	1262.12	1294.2	1283.43	1230.16	1236.78	1208.07
60	1314.38	1265.83	1284.2	1283.57	1247	1243.69	1212.9
60.1	1308.73	1267.83	1297.48	1280.12	1234	1234.56	1208.52
60.2	1306.99	1251.91	1289.59	1269.97	1232.01	1248.97	1222.58
60.3	1299.47	1263.4	1292.59	1279.82	1227.74	1243.48	1222.68
60.4	1300.45	1264.05	1278.36	1278.14	1233.79	1241.91	1211.79
60.5	1302.76	1260.24	1288.2	1276.81	1225.56	1246.39	1222.97
60.6	1305.34	1257.6	1284.25	1266.84	1232.3	1239.6	1221.03
60.7	1301.52	1267.22	1285.73	1271.79	1238.71	1243.1	1217.13
60.8	1312.72	1266.48	1291.93	1277.84	1244.85	1241.02	1208.43
60.9	1302.19	1258.32	1284.76	1266.11	1239.9	1243.35	1214.77
61	1298.86	1265.38	1280.32	1276.5	1252.31	1237.18	1220.74
61.1	1296.91	1275.22	1285.07	1275.72	1245.5	1241.27	1212.35
61.2	1304.38	1270.25	1296.05	1263.6	1251.74	1242.21	1215.23
61.3	1299.6	1276.9	1275.83	1261.59	1236.2	1239.69	1214.57
61.4	1293.83	1276.8	1274.28	1260.01	1240.4	1252.01	1220.62
61.5	1298.27	1270.27	1272.01	1263.52	1239.1	1241.65	1216.24
61.6	1297.47	1253.18	1279.99	1259.72	1250.12	1237.34	1212.37
61.7	1300.95	1265.7	1269.76	1272.48	1248.82	1240.38	1203.22
61.8	1305.13	1260.93	1275.83	1262.71	1251.03	1229.91	1210.4
61.9	1295.01	1271.85	1276.52	1260.12	1236.04	1248.67	1207.13
62	1294.5	1259.31	1273.23	1259.55	1248.41	1235.53	1199.55
62.1	1295.48	1272.07	1277.02	1259.1	1237.21	1233.97	1206.62
62.2	1297.02	1272.35	1284.38	1262.77	1233.2	1234.91	1208.57
62.3	1297.77	1270.79	1273.22	1268.17	1239.27	1245.14	1204.26
62.4	1289.83	1271.03	1267.28	1267.02	1244.75	1240.8	1210.69
62.5	1287.8	1279.94	1262.69	1271.2	1245.03	1233.42	1202.43
62.6	1292.93	1279.45	1271.38	1259.58	1251.89	1226.91	1200.91
62.7	1292.49	1264.71	1276.23	1267.95	1248.73	1248.5	1229.34
62.8	1295.42	1275.16	1270.03	1267.65	1244.93	1250.41	1207.88
62.9	1307.28	1262.43	1287.28	1263.65	1250.99	1243.16	1211.34
63	1295.74	1268.72	1277.82	1268.98	1246.07	1244.31	1206.12
63.1	1295.12	1258.44	1285.64	1269.31	1243.28	1254.74	1210.51
63.2	1296.58	1266.65	1285.95	1270.01	1235.59	1251.15	1212.64
63.3	1305.04	1266.27	1276.5	1271.45	1225.31	1254.34	1214.9
63.4	1294.44	1260.08	1279.85	1272.1	1232.21	1242.94	1213.46
63.5	1298.39	1265.14	1280.54	1279.56	1230.57	1236.57	1203.58
63.6	1292.75	1271.51	1275.3	1270.47	1237.1	1245.51	1205.3
63.7	1291.4	1264.48	1284.68	1267.62	1222.05	1248.16	1224.13
63.8	1292.87	1265.14	1281.85	1274.63	1235.36	1247.9	1206.21
63.9	1295.05	1266.38	1277.72	1271.22	1234.95	1253.55	1205.71
64	1296.25	1263.55	1277.1	1278.09	1229.94	1239.97	1211.86
64.1	1293.78	1265.1	1277.81	1264.72	1224.85	1253.74	1204.6
64.2	1304.16	1267.33	1275.25	1265.77	1228.43	1243.41	1206.38
64.3	1287.94	1269.01	1271.08	1265.73	1224.4	1254.57	1207.19
64.4	1297.75	1263.4	1272.9	1267.17	1230.65	1248.77	1195.53
64.5	1297.64	1265.9	1273.76	1268.53	1227.67	1244.99	1180.7
64.6	1295.4	1263.42	1269.42	1257.26	1233.8	1233.04	1186.91
64.7	1293.14	1264.13	1281.71	1262.48	1227.44	1244.82	1190.53
64.8	1300.99	1268.96	1273.07	1271.03	1235.52	1248.33	1191.88
64.9	1297.82	1268.6	1272.87	1255.62	1235.75	1251.91	1195.48
65	1298.02	1267.23	1275.11	1260.21	1252.28	1245.25	1205.99
65.1	1292.81	1268.23	1275.57	1264.09	1236.49	1243.33	1203.24
65.2	1292.13	1274.42	1269.54	1260.28	1234.51	1252.42	1196.26
65.3	1303.77	1268.2	1268.35	1266.8	1242.18	1247.4	1192.87
65.4	1297.52	1269.49	1268.87	1272.64	1246.72	1240.77	1199.64
65.5	1300.7	1270.45	1277.36	1279.14	1240.81	1248.15	1201.1
65.6	1293.71	1268.33	1268.36	1278.48	1237.33	1261.02	1204.26
65.7	1291.25	1278.63	1266.87	1283.85	1235.25	1261.39	1202.54
65.8	1287.09	1273.4	1265.85	1286.64	1237.69	1259.63	1200.51
65.9	1292.16	1269.19	1272.77	1274.93	1235.4	1246.32	1220.76
66	1294.77	1266.46	1277.52	1277.88	1230.65	1240.3	1207.89
66.1	1297.04	1260.94	1277.12	1293.32	1229.28	1249.62	1205.87
66.2	1296.19	1266.44	1285.68	1290.49	1231.39	1251.88	1218.71
66.3	1297.38	1261.51	1280.35	1284.79	1226.5	1257.01	1202.01
66.4	1296.03	1262.49	1283.7	1278.17	1230.54	1248.74	1191.3
66.5	1290.57	1270.09	1289.79	1288.37	1234.9	1260.17	1197.14
66.6	1294.97	1270.24	1282.32	1280.89	1229.68	1264.59	1203.12
66.7	1298.67	1269.97	1283.75	1281.5	1231.68	1252.72	1201.21
66.8	1298.1	1271.9	1276.8	1279.3	1228.48	1253.44	1214.66
66.9	1302.86	1267.28	1285.12	1263.46	1225.88	1259.42	1206.1
67	1299	1266.15	1268.53	1272.73	1233.28	1264.07	1209.25
67.1	1306.38	1259.58	1279.93	1267.71	1228.56	1247.15	1199.17
67.2	1300.2	1259.85	1278.45	1285.08	1236.23	1249.98	1187.94
67.3	1304.25	1263.07	1280.51	1267.72	1224.76	1257.98	1187.53
67.4	1295.15	1274.46	1282.81	1270.62	1221.54	1247.12	1190.22
67.5	1298.91	1264	1283.86	1274.1	1229.46	1241.8	1184.28
67.6	1299.3	1264.02	1280.81	1267.08	1225.12	1247.62	1195.01
67.7	1306.72	1273.12	1280.34	1276.28	1221.16	1253.21	1187.24
67.8	1299.86	1263.9	1279.83	1264.22	1231.16	1253.8	1202.94
67.9	1297.61	1270.41	1279.33	1274.83	1232.71	1254.33	1199.74
68	1300.5	1264.65	1275.08	1278.35	1228.41	1255.96	1194.99
68.1	1303.78	1263.22	1280	1274.42	1227.68	1259.55	1201.96
68.2	1301.55	1257.79	1275.34	1278.99	1231.12	1268.4	1199.3
68.3	1306.97	1254.54	1275.09	1277.52	1227.88	1243.83	1199.14
68.4	1307.33	1256.72	1279.74	1276.92	1244.55	1262.66	1204.25
68.5	1302.21	1265.51	1274.36	1266.54	1234.17	1245.43	1200.62
68.6	1303.23	1257.8	1277.95	1267.2	1234.21	1244.9	1190.54
68.7	1301.9	1269.29	1281.13	1268.81	1234.19	1251.44	1194.06
68.8	1300.49	1270.42	1283.25	1286.04	1226.34	1249.73	1196.16
68.9	1306.01	1262.78	1282.3	1269.44	1226.11	1258.17	1198.62
69	1303.02	1269.82	1291.57	1268.68	1230.46	1249.17	1186.57
69.1	1301.83	1271.26	1281.93	1252.55	1223.4	1255.71	1194.71
69.2	1297.84	1266.82	1279.24	1275.37	1216.61	1250.9	1190.59
69.3	1294.23	1282.75	1285.59	1267.29	1231.4	1244.72	1194.64
69.4	1294.12	1263.99	1279.41	1270.47	1230.79	1259.21	1194.19
69.5	1299.32	1267.21	1270.18	1280.91	1226.57	1258.12	1195.43
69.6	1296.99	1268.96	1282.2	1272.7	1229.49	1255.95	1201.92
69.7	1299.34	1272.65	1283.17	1275.42	1223.4	1241.36	1203.07
69.8	1301.95	1275.99	1274.88	1271.65	1227.96	1236.09	1191.74
69.9	1290.44	1268.5	1287.2	1274.37	1232.14	1247.69	1192.95
70	1295.31	1278.28	1280.39	1271.21	1226.24	1242.93	1194.81
70.1	1293.88	1278.04	1282.98	1265.27	1233.51	1249.74	1196.69
70.2	1288.18	1277.76	1280.92	1264.41	1226.11	1256.21	1199.89
70.3	1291.28	1280.97	1275.41	1279.5	1223.2	1240.3	1204.51
70.4	1298.93	1268.14	1272.32	1271.65	1218.77	1240.69	1191.93
70.5	1293.85	1276.27	1275.84	1271.5	1217.43	1235.3	1190.75
70.6	1290.38	1277.16	1275.39	1276.16	1230.09	1236.29	1190.42
70.7	1292.67	1266.92	1283.56	1265.4	1221.03	1244.52	1203.55
70.8	1300.64	1263.78	1281.38	1271.45	1230.21	1239.31	1202.07
70.9	1297.44	1269.03	1275.76	1277	1222.84	1226.94	1206.88
71	1308.34	1272.71	1274.16	1261.97	1216.11	1235.53	1200.39
71.1	1302	1277.05	1275.85	1267.82	1222.98	1233.4	1195.91
71.2	1294.9	1270.88	1282.76	1278.13	1218.37	1236.27	1194.7
71.3	1306.54	1271.72	1274.86	1271.58	1229.38	1233.56	1193.9
71.4	1305.84	1269.71	1279.77	1266.24	1225.87	1238.66	1205.74
71.5	1309.44	1267.81	1270.68	1275.46	1224.66	1232.21	1205.94
71.6	1308.65	1274.28	1260.88	1274.51	1212.86	1230.11	1198.19
71.7	1308.02	1280.16	1272.24	1264.67	1215.9	1246.93	1200.33
71.8	1308.72	1266.91	1277.02	1261.84	1228.9	1243.7	1199.62
71.9	1299.5	1267.42	1279.53	1268.72	1217.33	1247.26	1206.43
72	1299	1268.35	1273.23	1264.57	1220.44	1234.87	1210.89
72.1	1304.98	1271.56	1281.95	1260.78	1222.86	1233.68	1214.28
72.2	1307.94	1276.11	1288.05	1263.33	1223.18	1234.13	1212.63
72.3	1301.81	1268.73	1288.78	1267.9	1228.73	1241.7	1203.51
72.4	1320.22	1263.49	1280.43	1255.4	1233.12	1230.35	1195.26
72.5	1304.27	1257.17	1281.9	1260.95	1223	1231.17	1209.6
72.6	1310.93	1259.26	1284.24	1265.17	1224.08	1241.68	1209.08
72.7	1304.72	1257.07	1287.32	1263.85	1230.71	1238.62	1199.65
72.8	1300.78	1263.8	1276.61	1260.66	1219.82	1244.41	1206.32
72.9	1301.43	1267.56	1291.32	1257.75	1223.4	1239.52	1209.1
73	1304.11	1261.4	1276.48	1268.39	1230.04	1242.27	1214.61
73.1	1305.95	1262.48	1273.56	1255.16	1231.42	1234.97	1207.33
73.2	1299.6	1266.21	1283.25	1256.98	1232.49	1244.9	1213.96
73.3	1302.88	1265.88	1280.12	1258.66	1230.55	1234.3	1214.04
73.4	1293.8	1267.94	1279.58	1256.46	1223.13	1235.15	1216.94
73.5	1305.63	1266.95	1276.88	1251.98	1225.44	1243.97	1208.79
73.6	1292.59	1259.88	1276	1261.92	1231.59	1230.36	1205.95
73.7	1292.82	1267.85	1283.19	1250.58	1223.04	1253.61	1200.63
73.8	1299.47	1268.49	1284.26	1252.43	1222.18	1251.63	1194.84
73.9	1297.8	1261.32	1285.07	1264.96	1232.83	1239.35	1188.64
74	1300.43	1268.62	1286.35	1256.95	1223.93	1228.97	1188.37
74.1	1298.23	1266.92	1297.01	1263.18	1232.3	1240.96	1201.76
74.2	1299.83	1270.69	1280.2	1267.39	1230.73	1227.5	1203.16
74.3	1300.41	1266.33	1284.18	1267.68	1226.66	1225.34	1208.37
74.4	1302.93	1268.23	1285.94	1254.32	1221.03	1219.68	1200.14
74.5	1305.08	1261.89	1281.79	1258.39	1234.77	1229.81	1193.75
74.6	1304.71	1262.97	1280.22	1256.45	1221.7	1238.4	1193.36
74.7	1311.71	1258.96	1279.55	1250.08	1229.2	1249.75	1194.2
74.8	1307.4	1266.21	1283.35	1263.06	1211.31	1236.76	1196
74.9	1309.95	1270.02	1294.53	1249.11	1229.76	1246.82	1198.16
75	1306.51	1265.02	1281.94	1264.34	1222.56	1253.83	1206.57
75.1	1307.66	1260.81	1287.18	1258.35	1228.06	1254.33	1207.09
75.2	1304.31	1266.01	1279.62	1266.64	1213.42	1241.69	1219.44
75.3	1317.48	1262.1	1277.82	1259.63	1208.8	1230.65	1212.93
75.4	1304.24	1266.89	1287.3	1274.81	1210.77	1244.16	1207.91
75.5	1310.22	1269.07	1281.39	1275.96	1227.03	1233.85	1201.77
75.6	1302.32	1266.78	1287.94	1270.01	1226.99	1232.62	1211
75.7	1308.48	1265.75	1283.72	1261.07	1221.28	1232.52	1192.03
75.8	1305.17	1264.05	1291.03	1258.74	1222.69	1241.01	1185.21
75.9	1305.57	1270.33	1288.69	1262.24	1228.87	1235.82	1189.89
76	1299.22	1262.37	1283.83	1264.09	1230.37	1235.87	1205.29
76.1	1298.16	1268.12	1287.93	1271.12	1223.72	1228.51	1201.6
76.2	1297.97	1259.18	1281.82	1272.27	1225.42	1236.16	1199.51
76.3	1293.03	1259.89	1287.43	1271.45	1222.37	1230.69	1196.04
76.4	1299.87	1266.02	1288.17	1262.05	1219.59	1235.31	1208.29
76.5	1296.97	1261.28	1284.56	1265.66	1221.73	1229.69	1211.92
76.6	1298.1	1270.46	1283.81	1264.27	1215.33	1244.34	1204.81
76.7	1292.01	1266.78	1283.35	1271.14	1210.51	1236.58	1199.79
76.8	1303.45	1261.3	1277.38	1279.36	1209.31	1229.55	1194.2
76.9	1303.27	1272.13	1284.39	1264.86	1209.79	1235.84	1191.17
77	1310.59	1263.2	1277.74	1256.57	1223.22	1240.16	1191.01
77.1	1298.65	1255.7	1273.99	1268.03	1240.23	1240.68	1200.34
77.2	1297.37	1257.1	1282.06	1266.27	1220.93	1250.4	1209.25
77.3	1304.86	1262.16	1276.6	1263.71	1219.27	1254.15	1202.49
77.4	1296.63	1268.43	1278.94	1264.06	1226.43	1247.72	1189.08
77.5	1307.72	1269.07	1277.9	1271.45	1224.61	1235.44	1193.48
77.6	1299.55	1259.92	1279.05	1260.56	1223.34	1240.96	1204.3
77.7	1312.81	1265.53	1273.85	1273.48	1218.73	1260.93	1181.21
77.8	1308.01	1261.37	1277.35	1260.92	1215.56	1258.43	1181.72
77.9	1312.74	1265.45	1277.2	1257.25	1219.38	1254.16	1192.25
78	1305.2	1271.59	1291.15	1261.66	1214.67	1242.03	1197.3
78.1	1307.54	1279.53	1287.38	1264.52	1221.33	1246.05	1207.4
78.2	1313.47	1266.36	1275.34	1270.1	1214.88	1254.28	1208.26
78.3	1305.51	1271.78	1278.79	1267.05	1208.38	1250.93	1182.51
78.4	1309.84	1279.08	1292.14	1266.34	1212.66	1241.33	1184.62
78.5	1305.8	1270.8	1286.92	1267.19	1215.51	1248.08	1186.75
78.6	1299.03	1281.65	1287.96	1272.67	1219.26	1252.74	1184.82
78.7	1303.29	1264.98	1287.01	1271.58	1217.62	1249.37	1188.18
78.8	1296.36	1274.6	1279.34	1268.68	1228.53	1244.41	1174.8
78.9	1304.11	1268.2	1281.32	1271.1	1225.93	1238.73	1191.51
79	1308.55	1266.86	1288.04	1268.99	1216.42	1238.96	1186.43
79.1	1302.26	1271.3	1275.82	1263.3	1218.8	1240.97	1182.8
79.2	1294.18	1267.76	1287.95	1266.93	1217.87	1242.14	1187.07
79.3	1293.62	1276.69	1280.5	1271.71	1228.09	1228.92	1201.12
79.4	1300.25	1273.95	1288.4	1263.94	1228.89	1236.51	1195.55
79.5	1303.29	1275.94	1282.12	1259.85	1213.78	1235.03	1193.57
79.6	1296.95	1269.53	1281.64	1265.77	1229.35	1243.25	1194.88
79.7	1299.84	1267.59	1280.83	1261.31	1220.44	1243.03	1193.86
79.8	1291.83	1266.77	1278.42	1258.03	1217.77	1245.53	1189.36
79.9	1296.88	1268.26	1282.12	1265.6	1215.92	1242.81	1193.06
80	1299.83	1270.71	1277.57	1261.61	1225.95	1243.21	1207.25
80.1	1296.58	1265.59	1275.39	1265.59	1230.26	1238.02	1206.19
80.2	1292.12	1270.44	1275.47	1258.12	1221.89	1235.37	1201.19
80.3	1292.04	1272.18	1274.38	1254.21	1221.04	1228.7	1203.59
80.4	1291.02	1271.4	1277.75	1268.76	1217.62	1229.42	1211.09
80.5	1307.33	1270.12	1279.57	1264.91	1223.84	1247.66	1192.53
80.6	1307.58	1267.87	1274.03	1264.49	1220.85	1240.89	1192.29
80.7	1297.66	1262.39	1285.07	1260.99	1211.36	1245.06	1198.76
80.8	1300.33	1264.25	1280.25	1264.95	1208.06	1235.62	1207.36
80.9	1303.47	1264.01	1280.98	1262.99	1209.81	1241	1196.93
81	1308.45	1264.47	1270.76	1267.48	1231.66	1233.68	1204.75
81.1	1304.71	1275.18	1287.8	1258.52	1219.16	1247.31	1198.49
81.2	1301	1256.84	1278.98	1254.12	1221.47	1244.03	1215.12
81.3	1305.91	1268.45	1284.35	1260.68	1212.51	1235.66	1211.08
81.4	1304.52	1269.65	1278.02	1263.66	1217.21	1241.35	1207.86
81.5	1291.58	1266.13	1286.8	1261.38	1215.83	1233.07	1199.97
81.6	1302.75	1268.58	1278.06	1258.96	1224.97	1237.67	1197.94
81.7	1295.24	1263.54	1277.4	1259.89	1219.64	1231.43	1197.6
81.8	1304.16	1262.04	1265.78	1254.58	1213.68	1233.01	1194.26
81.9	1305.9	1257.11	1272.08	1254.58	1216.86	1236.44	1189.26
82	1299.63	1259.14	1270.41	1251.02	1226.01	1234.85	1197.99
82.1	1296.33	1268.5	1263.46	1257.56	1231.18	1245.49	1184.22
82.2	1305.33	1270.04	1272.59	1261.58	1227.5	1245.02	1179.91
82.3	1296.85	1262.09	1269.93	1265.09	1218.04	1237.09	1188.62
82.4	1297.06	1266.3	1279.01	1268.74	1230.9	1247.54	1190.51
82.5	1303.53	1260.5	1278.49	1268.28	1235.5	1232.68	1188.56
82.6	1294	1262.41	1283.79	1259.94	1234.07	1230.76	1195.59
82.7	1299.48	1266.65	1272.64	1262.58	1221.68	1236.28	1191.93
82.8	1296.08	1269.8	1277.23	1248.96	1235.22	1250	1192.17
82.9	1301.2	1260.79	1274.91	1265.46	1234.18	1239.84	1183.62
83	1304.98	1269.45	1278.94	1255.62	1237.4	1255.21	1189.19
83.1	1301	1267.05	1282.11	1270.54	1220.27	1242.64	1193.94
83.2	1306.92	1266.9	1287.45	1257.02	1238.72	1249.25	1195.37
83.3	1303.18	1256.39	1276.41	1269.7	1236.78	1249.25	1186.57
83.4	1303.71	1257.58	1272.27	1263.57	1223.02	1241.93	1184.55
83.5	1297.35	1263.33	1271.3	1263.79	1221.41	1248.4	1189.67
83.6	1301.78	1262.41	1271.73	1272.03	1216.82	1243.84	1192.55
83.7	1303.08	1252.99	1272.18	1262.84	1221.69	1230.97	1194.33
83.8	1301.84	1261.17	1269.95	1256.37	1219.08	1237.41	1202.52
83.9	1292.9	1265.3	1271.38	1259.86	1224.42	1235.24	1201.9
84	1300.64	1258.85	1276.81	1263.94	1220.35	1237.32	1199.2
84.1	1297.32	1258.24	1285	1264.16	1220.59	1241.16	1195.6
84.2	1290.79	1267.63	1282.01	1260.76	1211.69	1235.11	1194.88
84.3	1300.53	1268.73	1280.28	1276.38	1213.2	1230.3	1202.46
84.4	1295.42	1274.83	1284.43	1260.31	1218.83	1232.02	1193.14
84.5	1295.97	1264.03	1280.47	1276.34	1218.43	1234.19	1193.98
84.6	1300.08	1264.31	1267.2	1266.48	1218.45	1232.22	1196.09
84.7	1294.85	1262.11	1287.71	1263.55	1217.38	1230.56	1191.51
84.8	1296.51	1265.24	1283.29	1271.2	1216.13	1224.11	1196.86
84.9	1306.07	1270.61	1271.28	1269.99	1206.19	1233.1	1194.24
85	1296.14	1264.04	1285.95	1269.07	1214.2	1245.39	1205.17
85.1	1300.76	1268.16	1278.11	1268.45	1227.06	1236.86	1189.74
85.2	1298.13	1267.49	1288.78	1272.64	1219.44	1245.58	1195.61
85.3	1295.1	1271.86	1277.79	1274.93	1218.9	1251.01	1189.54
85.4	1287.99	1259.04	1279.92	1265.8	1213.03	1253.05	1199.63
85.5	1288.94	1266.41	1281.01	1266.96	1212.97	1246.87	1207.06
85.6	1289.36	1270.25	1287.47	1262.53	1203.95	1248.18	1190.11
85.7	1297.03	1272.16	1280.04	1264.36	1212.85	1233.44	1213.38
85.8	1296.76	1280.95	1285.69	1256.07	1203.31	1241.37	1208.17
85.9	1296.96	1278.8	1280.04	1270.13	1214.05	1247.53	1193.62
86	1304.24	1267.62	1281.22	1254.98	1210.64	1246.8	1201.61
86.1	1305.9	1261.14	1277.5	1259.81	1222.26	1255.26	1195.58
86.2	1299.42	1280.35	1281.43	1272.2	1220.85	1257.39	1191.88
86.3	1287.94	1267.3	1288.55	1267.53	1223.23	1241.16	1196.77
86.4	1302.05	1268.16	1283.39	1266.71	1219.46	1248.71	1197.89
86.5	1309.45	1272.27	1287.03	1266.04	1220.53	1250.62	1197.52
86.6	1303.09	1276.47	1287.21	1259.36	1223.83	1245.09	1193.04
86.7	1298.08	1273.99	1287.94	1270.47	1217.99	1245.29	1204.92
86.8	1301.31	1277.6	1268.05	1271.51	1216.81	1250.2	1205.86
86.9	1293.54	1277.39	1281.84	1268.21	1217.19	1244.26	1210.47
87	1295.18	1269.93	1281.19	1262.55	1212.89	1245.26	1196.49
87.1	1297.82	1275.68	1290.68	1263.11	1222.6	1238.4	1200.02
87.2	1297.17	1271.31	1280.36	1256.58	1207.16	1232.46	1218.04
87.3	1305.7	1273.66	1278.25	1261.1	1211	1231.17	1196.11
87.4	1298.15	1278.4	1279.76	1254.37	1208.91	1228.44	1198.3
87.5	1303.28	1266.51	1277.68	1267.69	1220.74	1230.24	1190.33
87.6	1299.59	1280.02	1285.39	1261.48	1221.69	1223.94	1192.63
87.7	1302.78	1278.08	1284.04	1253.36	1214.25	1231.12	1190.82
87.8	1299.6	1275.23	1277.93	1257.55	1215.09	1219.46	1197.74
87.9	1297.58	1276.57	1267.7	1248.84	1220.09	1230.69	1196.98
88	1300.17	1271.47	1262.85	1258.6	1222.63	1234.57	1200.88
88.1	1301.58	1264.53	1265.92	1261.29	1213.29	1234.76	1201.92
88.2	1303.88	1263.41	1263.61	1254.95	1223.1	1239.85	1183.76
88.3	1307.07	1275.45	1273.01	1251.67	1208.79	1250.24	1203.64
88.4	1298.09	1259.98	1271.17	1264.52	1210.66	1235.72	1204.6
88.5	1305.94	1248.97	1274.08	1258.76	1218.53	1241.43	1211.83
88.6	1294.79	1259.01	1268.89	1261.73	1219.95	1233.75	1202.23
88.7	1307.43	1263.58	1270.35	1258.78	1210.86	1247.72	1208.49
88.8	1298.36	1263.72	1266.49	1259.45	1228	1236.98	1208.47
88.9	1297.64	1265.41	1259.55	1267.25	1219.81	1236.9	1208.73
89	1306.68	1260.77	1260.61	1244.66	1223.63	1229.18	1205.24
89.1	1305.05	1263.64	1274	1254.71	1220.42	1232.78	1211.15
89.2	1301.64	1267.04	1269.08	1252.19	1209.73	1243.46	1208.99
89.3	1298.77	1269.21	1263.36	1252.36	1221.48	1232.53	1204.16
89.4	1297.51	1266.25	1269.47	1256.59	1213.6	1239.41	1204.8
89.5	1308.89	1259.14	1274.41	1255.64	1219.04	1234.71	1191.91
89.6	1306.4	1269.58	1254.34	1252.09	1210.59	1231.54	1197.94
89.7	1298.83	1267.41	1260.05	1256.4	1209.91	1233.78	1186.15
89.8	1298.33	1271.56	1262.93	1248.47	1225.59	1229.8	1191.65
89.9	1301.59	1270.07	1262.01	1256.52	1222.74	1239.59	1200.6
90	1307.58	1264.06	1262.94	1256.29	1224.63	1227.77	1207.27
90.1	1301.96	1269.55	1262.49	1251.44	1220.88	1239.13	1198.41
90.2	1297.7	1277.51	1266.23	1258.95	1224.42	1238.56	1200.27
90.3	1303.38	1262.23	1261.29	1254.64	1228.29	1234.9	1193.6
90.4	1300.44	1259.48	1271.69	1256.18	1218.53	1250.32	1207.63
90.5	1296.01	1265.62	1274.61	1259.5	1240.4	1258.41	1196.15
90.6	1304.4	1267.37	1277.19	1260.57	1228.64	1252.09	1198.03
90.7	1301.02	1270.61	1270.47	1264.86	1230.13	1250.33	1205.21
90.8	1301.93	1267.72	1270.03	1263.91	1223.52	1262.59	1196.07
90.9	1303.89	1263.17	1259.37	1264.72	1221.39	1251.4	1206.69
91	1297.16	1277.49	1260.18	1269.27	1223.42	1248.08	1201.69
91.1	1297.43	1272.68	1270.71	1274.35	1217.36	1238.81	1190.91
91.2	1298.41	1272.74	1269.13	1273.55	1210.82	1243.32	1192.65
91.3	1303.05	1274.86	1277.06	1263.7	1224.32	1237.88	1194.81
91.4	1298.77	1272.3	1261.05	1271.41	1219.35	1229.48	1206.03
91.5	1305.11	1285.1	1261.67	1258.61	1219.43	1240.47	1208.38
91.6	1297.2	1281.08	1262.88	1261.16	1217.19	1237.15	1199.66
91.7	1296.01	1277.97	1263.63	1267.76	1231.74	1233	1200.01
91.8	1299.49	1269.23	1270.09	1262.19	1227.35	1217.5	1204.52
91.9	1303.63	1273.83	1271.73	1264.61	1218.32	1238.47	1208.01
92	1300.22	1278.38	1275.71	1262.19	1217.62	1238.02	1202.44
92.1	1300.73	1269.19	1280.97	1269.64	1217.1	1229.2	1207.39
92.2	1299.15	1266.87	1274.74	1262.59	1215.4	1229.92	1192.23
92.3	1302.72	1272.01	1277.87	1262.83	1230.14	1234.12	1203.66
92.4	1300.89	1277.53	1273.22	1261.21	1226.63	1245.6	1205.28
92.5	1299.84	1275.34	1273.36	1272.7	1226.33	1245.01	1207.73
92.6	1303.32	1272.7	1276.6	1266.16	1233.1	1242	1202.2
92.7	1294.12	1281.77	1272.36	1266.8	1225.55	1248.14	1191.87
92.8	1302.22	1272.14	1277.48	1261.65	1222.55	1237.53	1196.13
92.9	1297.96	1268.83	1285.07	1267.33	1232.31	1251.51	1198.75
93	1300.09	1266.78	1281.73	1270.55	1223.08	1242.73	1191.21
93.1	1301.4	1264.37	1280.54	1276.1	1230.62	1247.45	1185.3
93.2	1295.52	1267.35	1272.37	1260.71	1232.59	1242.51	1190.61
93.3	1297.44	1269.48	1278.81	1266.38	1213.51	1254.58	1175.97
93.4	1295.07	1267.87	1284.57	1274.49	1210.14	1264.91	1195.43
93.5	1292.35	1270.43	1285.63	1270.09	1218.61	1251.08	1182.41
93.6	1307.3	1278.96	1277.35	1266.2	1207.02	1241.56	1180.52
93.7	1299.4	1262.44	1292.45	1269.32	1228.69	1266.51	1169.42
93.8	1307.56	1270.84	1281.58	1273.83	1223.75	1246.77	1172.42
93.9	1305.39	1282.85	1283.91	1272.81	1212.78	1237.23	1178.55
94	1307.7	1278.38	1289.8	1275.75	1226.07	1229.84	1191.12
94.1	1311.46	1288.78	1284.34	1268.69	1222.37	1239.12	1179.75
94.2	1307.59	1270.19	1285.01	1259.13	1222.68	1234.78	1183.45
94.3	1310.65	1277.04	1282.17	1258.82	1224.04	1244.48	1192
94.4	1307.35	1267.06	1289.58	1256.56	1232.7	1242.86	1183.78
94.5	1306.42	1282.01	1279.21	1260.98	1213.75	1239.01	1185.35
94.6	1306.8	1280.02	1280.68	1263.67	1236.42	1229.06	1174.07
94.7	1305.82	1281.79	1288.95	1263.6	1218.12	1230.51	1179.83
94.8	1309.83	1282.34	1284.14	1262.61	1229.34	1233.91	1172.57
94.9	1301.73	1275.71	1286.28	1254.45	1220.65	1233.68	1181.49
95	1303.44	1273.88	1287.17	1270.71	1224.98	1230.43	1181.6
95.1	1302.73	1282.14	1286.91	1266.1	1220.98	1227.48	1175.82
95.2	1305.92	1279.36	1297.24	1281.47	1231.99	1238.77	1189.92
95.3	1311.4	1284.81	1284.46	1272.45	1211.96	1230.26	1182.75
95.4	1304.92	1279.89	1293.51	1266.16	1225.36	1232.37	1196.3
95.5	1302.76	1281.49	1293.87	1265.88	1221.71	1226.24	1193.9
95.6	1301.86	1285.29	1286.56	1266.12	1218.22	1226.43	1185.62
95.7	1306.87	1286.7	1288.38	1259.84	1208.32	1233.02	1188.87
95.8	1308.17	1269.35	1293.52	1254.73	1219.36	1231.1	1183.47
95.9	1298.89	1269.97	1291.24	1256.77	1230.86	1238.04	1184.51
96	1297.53	1282.44	1294.33	1246.85	1222.94	1238.56	1197.26
96.1	1302.01	1277.69	1289.16	1246.1	1215.98	1241.21	1194.22
96.2	1304.76	1272.99	1296.59	1243.97	1213.33	1237.39	1183.43
96.3	1302.28	1270.33	1288.35	1239.84	1216	1250.97	1192.58
96.4	1313.56	1277.02	1284.03	1241.01	1203.92	1250.38	1175.28
96.5	1305.39	1278.47	1293.1	1261.33	1214.12	1262.14	1193.16
96.6	1303.3	1280.85	1280.29	1259.87	1211.13	1255.36	1184.18
96.7	1303.32	1289.2	1279.24	1269.1	1210.27	1247.09	1190.27
96.8	1297	1288.16	1282.52	1263.23	1205.43	1253.63	1188.97
96.9	1305.86	1283.41	1271.74	1264.47	1209.69	1260.16	1179.74
97	1310.08	1277.42	1284.31	1261.51	1208.33	1246.92	1192.54
97.1	1305.1	1288.39	1273.46	1259.32	1200.85	1252.93	1182.74
97.2	1308.04	1278.47	1274.68	1265.77	1200.77	1246.84	1173.85
97.3	1303.75	1280.27	1276.05	1265.79	1206.95	1253.2	1179.18
97.4	1298.31	1278.56	1277.22	1259.08	1218.57	1255.29	1197.72
97.5	1305.2	1275.39	1287.47	1271.82	1214.37	1253.77	1190.78
97.6	1304.84	1279.7	1271.18	1262.68	1214.39	1256.08	1182.64
97.7	1302.24	1283.56	1270.15	1274.96	1208.25	1255.31	1188.82
97.8	1310.98	1277.17	1273.4	1266.25	1207.79	1259.84	1192.78
97.9	1306.7	1279.22	1279.99	1262.74	1193.11	1257	1187.11
98	1302.95	1285.97	1296.42	1258.51	1199.89	1251.31	1186.3
98.1	1312.16	1286.29	1283.17	1275.22	1209.72	1259.08	1185.94
98.2	1303.62	1286.01	1273.42	1271.91	1197	1257.29	1196.03
98.3	1311.53	1279.53	1274.73	1261.76	1202.34	1242.33	1190.83
98.4	1318.83	1286.95	1281.66	1280.48	1205.58	1255.88	1196.6
98.5	1315.55	1279.51	1273.57	1272.42	1203.17	1250.68	1194.16
98.6	1311.17	1286.06	1270.91	1265.7	1204.97	1259.26	1194.83
98.7	1316.16	1276.72	1269.51	1261.05	1216.28	1250.62	1198.49
98.8	1310.84	1280.47	1269.12	1263.04	1211.8	1248.4	1193.92
98.9	1303.64	1278.85	1278.07	1265.52	1209.21	1260.46	1189.49
99	1311.41	1269.41	1266.65	1262.2	1201.05	1252.99	1192.29
99.1	1305.44	1270.97	1271.32	1267.19	1206.75	1249.78	1187.62
99.2	1319.72	1281.7	1272.66	1263.33	1199.04	1253.96	1192.73
99.3	1310.81	1272.74	1280.88	1266.96	1192.78	1247.63	1193.52
99.4	1304.51	1274.32	1269.74	1270.52	1210.99	1255.87	1200.04
99.5	1314.35	1264.65	1259.27	1269.57	1203.48	1250.61	1184.09
99.6	1311.9	1267.93	1266.99	1263.14	1209.5	1249.95	1194.35
99.7	1303.12	1265.18	1268.48	1264.09	1201.54	1250.39	1191.72
99.8	1311.49	1277.42	1268.05	1265.97	1216.85	1247.11	1194.49
99.9	1306.3	1279.93	1273.31	1252.3	1216.69	1245.26	1190.26
100	1316.75	1277.91	1269.88	1259.52	1209.33	1251.02	1196.74
100.1	1306.7	1273.39	1276.68	1257.16	1209.34	1250.98	1194.82
100.2	1308.32	1270.3	1275.27	1259.72	1215.59	1235.7	1201.57
100.3	1318.21	1273.64	1280.45	1261.2	1220.92	1241.14	1197.63
100.4	1307.14	1268.86	1276.07	1254.53	1204.27	1243.7	1194.01
100.5	1308.87	1272.98	1286.48	1254.51	1201.31	1243.72	1193.46
100.6	1313.35	1285.86	1284.04	1258.84	1205.41	1248.5	1197.22
100.7	1305.31	1272.18	1297.62	1253.25	1207.16	1243.76	1186.92
100.8	1305.74	1275.05	1291.69	1270.96	1211.7	1240.65	1198.02
100.9	1313.74	1268.55	1283.91	1250.8	1209.45	1254.38	1205.9
101	1307.58	1262.81	1283.56	1266.58	1218.14	1237.95	1191.94
101.1	1314.24	1260.82	1277.52	1266.34	1221.44	1241.4	1183.46
101.2	1318.64	1270.87	1277.08	1274.37	1213.77	1237.22	1181.48
101.3	1310.81	1269.24	1275.71	1263.08	1212.84	1246.2	1186.66
101.4	1312.54	1274.03	1274.88	1269.21	1227.26	1246.47	1195.58
101.5	1310.84	1275.24	1272.24	1253.12	1219.74	1238.85	1173.77
101.6	1304.57	1267.95	1286.41	1264.93	1218.37	1242.36	1188.97
101.7	1314.09	1275.97	1286.1	1265.15	1220.91	1235.69	1184.34
101.8	1310.07	1277.34	1284.05	1272.77	1213.91	1241.48	1184.92
101.9	1305.33	1273.67	1289.51	1265.24	1228.84	1245.94	1180.96
102	1303.41	1278.01	1275.65	1248.49	1214.42	1245.48	1180.73
102.1	1312.7	1275.67	1272.54	1261.39	1200.85	1245.18	1184.69
102.2	1304.14	1276.04	1273.36	1256.35	1214.37	1240.72	1180.04
102.3	1310.68	1277.07	1283.9	1246.4	1213.31	1240.74	1173.38
102.4	1312.02	1276.2	1278.88	1269.35	1208.07	1246.66	1183.33
102.5	1314.93	1264.87	1276.74	1255.14	1211.05	1242.91	1187.12
102.6	1308.3	1270.93	1282.83	1272.54	1209.65	1236.46	1195.66
102.7	1309.38	1275.98	1290.85	1261.07	1213.3	1247.72	1186.5
102.8	1307.31	1266.77	1273.13	1267.24	1201.7	1237.04	1186.94
102.9	1306.73	1276.54	1277.28	1261.08	1201.43	1232.54	1187.98
103	1315.47	1278.99	1272.08	1252.68	1206	1235.84	1196.51
103.1	1311.21	1278.42	1278.09	1259.96	1208.23	1241.74	1198.8
103.2	1307.04	1277.51	1263.58	1260.34	1201.54	1249.44	1184.49
103.3	1302	1276.53	1272.36	1271.53	1208.08	1258.13	1176.73
103.4	1314.55	1271.74	1276.52	1264.71	1207.02	1266.34	1180.09
103.5	1300.88	1280.36	1274.49	1269.81	1211.3	1252.86	1180.48
103.6	1307.88	1286.6	1272.74	1265.98	1211.44	1246.95	1189.9
103.7	1299.46	1286.73	1273.13	1258.25	1224.79	1251.3	1195.56
103.8	1307.18	1287.09	1271.42	1258.4	1215.73	1250.58	1190.7
103.9	1308.54	1283.19	1269.7	1253.52	1217.61	1250.44	1192.53
104	1306.26	1288.73	1269.13	1251.58	1222.36	1252.1	1203.36
104.1	1302.92	1276.81	1275.06	1249.56	1218.92	1234.35	1192.41
104.2	1310.18	1278.86	1265.09	1253.34	1217.13	1253.08	1180.41
104.3	1306.13	1273.66	1269.29	1265.67	1231.72	1239.01	1198.75
104.4	1311.59	1274.05	1269.8	1259.65	1228.02	1257.22	1182.19
104.5	1310.54	1279.4	1258.58	1270.5	1210.57	1245.14	1189.54
104.6	1307.93	1273.18	1279.46	1260.45	1217.62	1244.41	1197.54
104.7	1306.45	1277.58	1259.19	1261.04	1215.62	1236.41	1175.01
104.8	1301.65	1271.66	1261.91	1260.27	1219.06	1238.56	1180.55
104.9	1307.42	1274.75	1277.32	1260.78	1211.99	1251.37	1194.78
105	1303.71	1268.54	1269.85	1266.94	1212	1240.7	1194.31
105.1	1303.9	1280.66	1267.04	1274.43	1219.28	1234.35	1198.14
105.2	1305.61	1272.62	1269.97	1270.09	1224.32	1246.16	1185.56
105.3	1305.91	1275.6	1265.65	1267.61	1219.88	1236.75	1183.53
105.4	1306.65	1270.66	1267.02	1262.85	1215.49	1251.99	1189.94
105.5	1303.37	1276.85	1266.84	1258.41	1224.79	1249.51	1189.58
105.6	1301.88	1259.88	1266.01	1270.12	1215.76	1248.11	1184.32
105.7	1303.3	1266.14	1273.47	1268.5	1212.22	1258.57	1195.65
105.8	1301.08	1275.71	1271.41	1268.35	1217.33	1258.43	1185.8
105.9	1310.47	1273.67	1268.22	1258.69	1222.12	1243.82	1181.83
106	1314.72	1281.22	1267.52	1253.39	1217.73	1261.12	1195.15
106.1	1309.03	1276.94	1261.34	1258.14	1226.75	1245.89	1175.56
106.2	1308.36	1271.59	1268.58	1254.97	1211.17	1251.8	1176.67
106.3	1304.51	1267.54	1281.53	1258.48	1217.71	1238.97	1186.53
106.4	1307.92	1273.88	1266.62	1271.63	1220.17	1245.66	1187.63
106.5	1301.55	1276.56	1254.23	1259.99	1212.6	1249.12	1179.32
106.6	1304.93	1274.15	1268.46	1264.7	1215.42	1251.1	1183.59
106.7	1305.71	1269.06	1264.84	1263.04	1220.08	1252.15	1182.8
106.8	1303.77	1268.56	1269.54	1270.27	1210.32	1251.02	1171.53
106.9	1296.67	1269.14	1279.34	1267.62	1216	1256.18	1171.56
107	1300.38	1274.19	1274.4	1265.01	1210.04	1264.14	1172.53
107.1	1305.5	1279.02	1274.06	1256.15	1223.64	1253.33	1172.36
107.2	1301.95	1265.45	1277.12	1265.28	1220.1	1245.89	1185.84
107.3	1299.63	1280.19	1279.95	1261.99	1218.86	1242.89	1183.78
107.4	1302.64	1281.25	1287.73	1271.74	1216.44	1239.66	1182.09
107.5	1303.76	1285.23	1282.44	1267.93	1226.77	1235.63	1183.04
[truncated: 28,925 more rows]

## Sheet: RMSF
ResID Chain A	3a	20a	37a	60a	70a	80a	95a		ResID Chain B	3b	20b	37b	60b	70b	80b	95b			ResID Chain C	3c	20c	37c	60c	70c	80c	95c
[truncated: 1,945 more rows]

[truncated: 1 more sheets: RBD]
